# Supplementary material for: Proteomic Signatures of Corals from Thermodynamic Reefs
Source: Microorganisms. 2020 Aug 1;8(8):1171. doi: 10.3390/microorganisms8081171 (PMC7465421; doi:10.3390/microorganisms8081171)
Supplement: Supplementary file 1 [file microorganisms-08-01171-s001.zip › Mayfield online supplemental data file.xlsx]

## Sheet: submission details
File types submitted to data repositories				SHVTS=Seriatopora hystrix variable temperature study (the name of the experiment; Mayfield et al. [2012; J. Exp. Biol.])
	File type	#files	names	File contents	File access	Notes	Sequence database queried
	RAW	2	SHVTS-A.raw, SHVTS-B.raw	peak data from the mass spectrometer	restricted to those with Thermo-Fisher Scientific's Proteome Discoverer (or equivalent)		The Seriatopora hystrix-Cladocopium transcriptome (conceptually translated to proteins)
	MZML	2	SHVTS-A.mzml, SHVTS-B.mzml	peak data from the mass spectrometer	open access	the respective RAW files were converted to MZML on the MassIVE deta repository (https://massive.ucsd.edu/)
	MZID	2	SHVTS-A.mzid, SHVTS-B.mzid	mass spectrometry results	open access	requires querying the RAW mass spectrometry or MZML peak data against a sequence database	http://symbiont.iis.sinica.edu.tw/s_hystrix/static/html/#stat
	fasta	1	SHVTS protein seqs.fa	conceptually translated Seriatopora hystrix-Cladocopium transcriptome	open access	can be opened
	PDF	2	Mayfield Microorganisms 2020.pdf, Mayfield Microorganisms 2020-supplemental material.pdf	the manuscript (and its associated supplemental material) describing the experiment	open access	The original manuscript describing the study is Mayfield et al. (2012 J. Exp. Biol).
Unless you have an interest in mass spectrometry and want to replicate these findings, all pertinent data can be found within this spreadsheet, namely the protein sequences and concentrations.
For those who are interested in reproducing these findings, I recommend accessing the same files mentioned above on the "MassIVE" mass spectrometry data repository (https://massive.ucsd.edu/).
You can find all of my data from this project under accession MSV000085863 (https://massive.ucsd.edu/ProteoSAFe/dataset.jsp?task=558adcff310b48279b6692dbe3ea41c0).
For more details on the S. hystrix-Cladocopium transcriptome, please check out this site: http://symbiont.iis.sinica.edu.tw/s_hystrix/static/html/#stat.

## Sheet: site info
Site	Latitude	Longitude	Body of water	Latitude	Longitude
Houwan	22°01’23.30’’N	120°41’18.29’’E	Taiwan Strait	22.0231	120.688
Houbihu	21°56’18.01’’N	120°44’45.54’’E	Nanwan Bay (Luzon Strait)	21.9383	120.746

## Sheet: terms
Terms in "sample ID" worksheet
Term	description
iTRAQ batch	isobaric tags for relative and absolute (protein) concentration (the original label-based proteomics method). As described elsewhere, I had to analyze my samples in two batches since the iTRAQ technology permits the assessment of only eight at a time
sample description	There are eight iTRAQ tags (aka "labels"): 113-119 and 121 (not 120). I used label 113 as the denominator since it was effectively the "control" coral sample against which the other samples within that batch are normalized. The exact same normalizer sample was run in both batches to control for batch-to-batch variation.
site	the field site in Southern Taiwan: Houbihu ("HBH," Nanwan Bay, Luzon Strait, South China Sea) and Houwan ("HWN," Taiwan Strait)
temp. treatment	variable (23-29C over a 6-hr cycle) and stable (26C over the entire duration of the 7-day study)
ste x treatment	the four site (HWN vs. HBH) x temperature treatment (stable vs. variable) interaction groups. See abbreviations on "sample ID" page.
iTRAQ label	self explanatory. See the associated manuscript for the catalog number from SCIEX (USA).
batch x label	iTRAQ batch and label for each sample. Please note that label 113 was the control sample that was run in each batch to control for batch-to-batch variation.
Terms in "iTRAQ batch A (SHVTS-A)" and "iTRAQ batch B (SHVTS-B)" worksheets
The actual protein sequences are hidden from displayed, but can be shown by clicking on the "+" signs in the left-most column. Other ancillary data are also shown upon doing so.
Protein FDR Confidence: Combined	This refers to whether the protein's identify could be verified with "high" confidence (p<0.01, calculated using a decoy database approach). "Medium" (0.01<p<0.05) and "low" (p>0.05) confidence proteins were not considered in this work, but those interested in them can extract the pertinent information from the MZML files.
Accession	This is the accession number of the sequence against which the protein aligned most closely in the Seriatopora hystrix-Cladocopium transcriptome. The associated fasta file can be downloaded from the MassIVE data repository submission (MSV000085863).
Exp. Q value Combined	This and the following terms are described here: https://pubmed.ncbi.nlm.nih.gov/18052118/. In short, q-values are adjusted p-values found using an optimized FDR approach and are likely the better term (over p-values) for assessing large mass spectrometry databsets.
Sum Pep Score	This is the percent chance that the software's guess about the protein ID was wrong.
Coverage (%)	The percentage of the protein that was sequenced.
# Peptides	The number of peptides sequenced that aligned to the accession number listed in the respective row.
# PSMs	PSM=peptide-spectrum match			The number of peptide spectrum matches. The number of PSM's is the total number of identified peptide spectra matched for the protein. The PSM value may be higher than the number of peptides identified for high-scoring proteins because peptides may be identified repeatedly.
# unique peptides	The number of unique peptides that mapped to the protein associated with the accession number listed in the respective row.
# protein groups	I have never seen this value be anything but one.
# AAs	This is the number of amino acids (AA) in the entire protein. Please note that this is nearly always much higher than what was sequenced (which can be discerned from clicking on the "+" sign at the far left of each row).
	To see the sequence of the entire protein, consult the attached Seriatopora hystrix-Cladocopium transcriptome (conceptually translated to proteins).
MW [kDA]	The molecular weight (MW) of the hypothetical protein, in kilodaltons (kDa). Please note that this is the MW of the entire protein, not just the peptide(s) sequenced herein
calc. PI	The isoelectric point calculated from the sequence of the entire protein (see protein linked to accession number), not the peptide sequenced herein.
Score Sequest HT: Sequest HT	Sum of the scores of the peptides from the Sequest HT search. This was not the preferred algorithm herein, and these data were not considered.
# Peptides (by Search Engine): Sequest HT	The number of distinct peptide sequences in a protein group from the Sequest HT search. As mentioned above, I did not generally rely on the Sequest algorithm herein.
Abundance ratios: 114/113 to 119/113	These are the quantitative data featured in the manuscript. The data reflect a ratio of the target sample's (#114-119) protein concentration over the concentration of that protein for the control/normalizing sample (#113). You will note that only a minority of proteins were successfully labeled (an unfortunate limitation of the technology).
Abundances (grouped: 113-119)	These are the raw data used to calculate the ratios (see preceding row.).
Found in sample (113-119)	These are qualitative concentration data. I am unsure of the threshold used by Thermo's Proteome Discoverer, and they do not explain it in the manual. Since there is no correlation between their subjective levels (not found, low, or high) and the actual ratio data of interest, I generally ignore these columns.

## Sheet: sample ID
iTRAQ batch	sample description	site	temp. treatment	site x treatment	iTRAQ label	batch-label
A	Abundance Ratio: (114) / (113) of SHVTS-A-HBH-var 6	HBH	variable	HBH-var	114	A-114
A	Abundance Ratio: (115) / (113) of SHVTS-A-HBH-stab 5	HBH	stable	HBH-stab	115	A-115
A	Abundance Ratio: (116) / (113) of SHVTS-A-HBH-stab 6	HBH	stable	HBH-stab	116	A-116
A	Abundance Ratio: (117) / (113) of SHVTS-A-HWN-var 1	HWN	variable	HWN-var	117	A-117
A	Abundance Ratio: (118) / (113) of SHVTS-A-HWN-stab 4	HWN	stable	HWN-stab	118	A-118
A	Abundance Ratio: (119) / (113) of SHVTS-A-HWN-stab 6	HWN	stable	HWN-stab	119	A-119
B	Abundance Ratio: (114) / (113) of SHVTS-B-HBH-var 1	HBH	variable	HBH-var	114	B-114
B	Abundance Ratio: (115) / (113) of SHVTS-B-HBH-stab1	HBH	stable	HBH-stab	115	B-115
B	Abundance Ratio: (116) / (113) of SHVTS-B-HBH-stab3	HBH	stable	HBH-stab	116	B-116
B	Abundance Ratio: (117) / (113) of SHVTS-B-HWN-var5	HWN	variable	HWN-var	117	B-117
B	Abundance Ratio: (118) / (113) of SHVTS-B-HWN-stab1	HWN	stable	HWN-stab	118	B-118
B	Abundance Ratio: (119) / (113) of SHVTS-B-HWN-var3	HWN	variable	HWN-var	119	B-119
		HBH=Houbihu (upwelling site)
		HWN=Houwan (non-upwelling control site)
		var=variable
		stab=stable
		Please note that a batch-normalizing control sample was labeled with iTRAQ tag 113
		and used as the denominator for all presented ratio data.

## Sheet: iTRAQ batch A (SHVTS-A)
Protein FDR Confidence: Combined	Accession	Exp. q-value: Combined	Sum PEP Score	Coverage [%]	# Peptides	# PSMs	# Unique Peptides	# Protein Groups	# AAs	MW [kDa]	calc. pI	Score Sequest HT: Sequest HT	# Peptides (by Search Engine): Sequest HT	Abundance Ratio: (114) / (113)	Abundance Ratio: (115) / (113)	Abundance Ratio: (116) / (113)	Abundance Ratio: (117) / (113)	Abundance Ratio: (118) / (113)	Abundance Ratio: (119) / (113)	Abundances (Grouped): 113	Abundances (Grouped): 114	Abundances (Grouped): 115	Abundances (Grouped): 116	Abundances (Grouped): 117	Abundances (Grouped): 118	Abundances (Grouped): 119	Found in Sample: 113	Found in Sample: 114	Found in Sample: 115	Found in Sample: 116	Found in Sample: 117	Found in Sample: 118	Found in Sample: 119
High	c47249_g1	0	0.282	3	1	14	1	1	374	39.5	6.62	0	1														High	High	High	High	High	High	High
Checked	Annotated Sequence	Modifications in Master Proteins	Qvality PEP	Qvality q-value	# Protein Groups	# Proteins	# PSMs	Master Protein Accessions	Positions in Master Proteins	# Missed Cleavages	Theo. MH+ [Da]	# Razor Quan Results	Abundance Ratio: (114) / (113)	Abundance Ratio: (116) / (113)	Abundance Ratio: (117) / (113)	Abundance Ratio: (118) / (113)	Abundance Ratio: (119) / (113)	Abundances (Grouped): 113	Abundances (Grouped): 114	Abundances (Grouped): 115	Abundances (Grouped): 116	Abundances (Grouped): 117	Abundances (Grouped): 118	Abundances (Grouped): 119	Abundances (Grouped): 121	Quan Info	Found in Sample: [S98] F12: 114, Sample	Found in Sample: [S99] F12: 115, Sample	Found in Sample: [S100] F12: 116, Sample	Found in Sample: [S101] F12: 117, Sample	Found in Sample: [S102] F12: 118, Sample	Found in Sample: [S103] F12: 119, Sample	Found in Sample: [S104] F12: 121, Sample	Percolator PEP (by Search Engine): Sequest HT	XCorr (by Search Engine): Sequest HT	Sequence in Protein	Positions in Protein	Peptide Group Modifications in Protein	Quan Usage
FALSE	[R].LRKAVGGGLR.[Q]		1	0	1	1	14	c47249_g1	c47249_g1 [257-266]	2	1026.65	0														No Quan Labels	High	High	High	High	High	High	Not Found	0.522082	0.96	R.LRKAVGGGLR.Q	[257-266]		Not Used
	Confidence	PSM Ambiguity	Annotated Sequence	Modifications	# Protein Groups	# Proteins	Master Protein Accessions	Protein Accessions	# Missed Cleavages	Charge	DeltaScore	DeltaCn	Rank	m/z [Da]	MH+ [Da]	Theo. MH+ [Da]	DeltaM [ppm]	Deltam/z [Da]	Activation Type	MS Order	Isolation Interference [%]	Average Reporter S/N	Ion Inject Time [ms]	RT [min]	First Scan	Spectrum File	Abundance: 113	Abundance: 114	Abundance: 115	Abundance: 116	Abundance: 117	Abundance: 118	Abundance: 119	XCorr	Percolator q-Value	Percolator PEP
	High	Unambiguous	[R].LRKAVGGGLR.[Q]		1	1	c47249_g1	c47249_g1	2	2	0.303	0	1	513.835	1026.66	1026.65	9.92	0.00509	HCD (High Energy Collision Dissociation)	MS2	15.9079	21.8	17.01	20.4458	4604	SHUTSA.raw	10.8	15.6	102.1	12.8	12.8	4.6	15.4	0.66	0	0.6613
	High	Unambiguous	[R].LRKAVGGGLR.[Q]		1	1	c47249_g1	c47249_g1	2	2	0.3854	0	1	513.835	1026.66	1026.65	8.85	0.00454	HCD (High Energy Collision Dissociation)	MS2	17.6647	21.2	50	5.8363	1187	SHUTSA.raw	35.2	32.3	56.6	15	6.5	11.6	12.6	0.96	0	0.522082
	Low	Unambiguous	[R].LRKAVGGGLR.[Q]		1	1	c47249_g1	c47249_g1	2	2	0.1034	0	1	513.835	1026.66	1026.65	8.61	0.00442	HCD (High Energy Collision Dissociation)	MS2	0	5.3	36.637	15.6408	3427	SHUTSA.raw	10.3	8.7	7.6	5.9	3.6	2.4	4.1	0.58	0.5954	0.9668
	Low	Unambiguous	[R].LRKAVGGGLR.[Q]		1	1	c47249_g1	c47249_g1	2	2	0.2718	0	1	513.835	1026.66	1026.65	9.68	0.00497	HCD (High Energy Collision Dissociation)	MS2	32.9583	4.5	50	15.1315	3319	SHUTSA.raw	8.7	3.8	8.1	3.5	3.8	4.4	3.6	1.03	0.8778	1
	Low	Unambiguous	[R].LRKAVGGGLR.[Q]		1	1	c47249_g1	c47249_g1	2	2	0.2394	0	1	513.835	1026.66	1026.65	9.56	0.00491	HCD (High Energy Collision Dissociation)	MS2	50.3913	31.2	50	5.3234	1067	SHUTSA.raw	64.3	31.6	47.2	26.7	34.2	24.6	20.8	0.71	0.8974	1
	Low	Rejected	[R].LRKAVGGGLR.[Q]		1	1	c47249_g1	c47249_g1	2	2		0.0444	2	513.834	1026.66	1026.65	8.02	0.00411	HCD (High Energy Collision Dissociation)	MS2	0	5.1	50	14.6222	3207	SHUTSA.raw	8.8	6.2	4.8	3.9	4.9	7.7	4.2	0.43	0.8974	1
	Low	Unambiguous	[R].LRKAVGGGLR.[Q]		1	1	c47249_g1	c47249_g1	2	2	0.0714	0	1	513.834	1026.66	1026.65	7.78	0.00399	HCD (High Energy Collision Dissociation)	MS2	29.6684	6.5	50	14.4552	3172	SHUTSA.raw	9.3	8	9.1	3.7	5.1	10.1	6.5	0.28	0.9015	1
	Low	Unambiguous	[R].LRKAVGGGLR.[Q]		1	1	c47249_g1	c47249_g1	2	2	0.3333	0	1	513.835	1026.66	1026.65	9.09	0.00466	HCD (High Energy Collision Dissociation)	MS2	14.9073	15.6	19.443	20.6168	4654	SHUTSA.raw	9.7	15	61.4	11.2	8.8	6.6	12.1	0.63	0.9015	1
	Low	Unambiguous	[R].LRKAVGGGLR.[Q]		1	1	c47249_g1	c47249_g1	2	2	0.3889	0	1	513.835	1026.66	1026.65	9.92	0.00509	HCD (High Energy Collision Dissociation)	MS2	62.3091	2.6	27.3	14.7896	3244	SHUTSA.raw	5.6	3.6	4.6	2.9		3.8		0.72	0.9146	1
	Low	Unambiguous	[R].LRKAVGGGLR.[Q]		1	1	c47249_g1	c47249_g1	2	2	0.3678	0	1	513.835	1026.66	1026.65	9.44	0.00485	HCD (High Energy Collision Dissociation)	MS2	0	6.8	31.175	15.9838	3503	SHUTSA.raw	8.7	12.3	8.6	8.3	5.9	6.9	3.9	0.87	0.9301	1
	Low	Unambiguous	[R].LRKAVGGGLR.[Q]		1	1	c47249_g1	c47249_g1	2	2	0.3194	0	1	513.835	1026.66	1026.65	8.73	0.00448	HCD (High Energy Collision Dissociation)	MS2	23.7071	2.4	22.985	15.4691	3391	SHUTSA.raw	4.1	3.3	4.1	3.2		4.3		0.72	0.9301	1
	Low	Unambiguous	[R].LRKAVGGGLR.[Q]		1	1	c47249_g1	c47249_g1	2	2	0.2031	0	1	513.835	1026.66	1026.65	8.61	0.00442	HCD (High Energy Collision Dissociation)	MS2	18.2985	4.9	35.769	15.3001	3355	SHUTSA.raw	13.3	4.8	5.5	2.5	4.1	3.7	5	0.64	0.9301	1
	Low	Unambiguous	[R].LRKAVGGGLR.[Q]		1	1	c47249_g1	c47249_g1	2	2	0.169	0	1	513.833	1026.66	1026.65	5.99	0.00308	HCD (High Energy Collision Dissociation)	MS2	46.8513	43.7	50	23.3692	5662	SHUTSA.raw	52.5	38.7	43.6	31.6	35.1	63.6	84.2	0.71	0.9301	1
	Low	Unambiguous	[R].LRKAVGGGLR.[Q]		1	1	c47249_g1	c47249_g1	2	2	0.1333	0	1	513.834	1026.66	1026.65	7.06	0.00363	HCD (High Energy Collision Dissociation)	MS2	0	3.7	22.119	15.81	3466	SHUTSA.raw	6	5.4	7.8	3.4		4.6	2.6	0.6	0.9389	1
High	c71126_g2	0	0.257	4	1	1	1	1	568	65.1	9.13	0	1														High	High	High	High	High	High	High
Checked	Annotated Sequence	Modifications in Master Proteins	Qvality PEP	Qvality q-value	# Protein Groups	# Proteins	# PSMs	Master Protein Accessions	Positions in Master Proteins	# Missed Cleavages	Theo. MH+ [Da]	# Razor Quan Results	Abundance Ratio: (114) / (113)	Abundance Ratio: (116) / (113)	Abundance Ratio: (117) / (113)	Abundance Ratio: (118) / (113)	Abundance Ratio: (119) / (113)	Abundances (Grouped): 113	Abundances (Grouped): 114	Abundances (Grouped): 115	Abundances (Grouped): 116	Abundances (Grouped): 117	Abundances (Grouped): 118	Abundances (Grouped): 119	Abundances (Grouped): 121	Quan Info	Found in Sample: [S98] F12: 114, Sample	Found in Sample: [S99] F12: 115, Sample	Found in Sample: [S100] F12: 116, Sample	Found in Sample: [S101] F12: 117, Sample	Found in Sample: [S102] F12: 118, Sample	Found in Sample: [S103] F12: 119, Sample	Found in Sample: [S104] F12: 121, Sample	Percolator PEP (by Search Engine): Sequest HT	XCorr (by Search Engine): Sequest HT	Sequence in Protein	Positions in Protein	Peptide Group Modifications in Protein	Quan Usage
FALSE	[K].FSMAFIKLPVGTEGAVPRLWETR.[R]		1	0	1	1	1	c71126_g2	c71126_g2 [385-407]	2	2621.39	0														No Quan Labels	High	High	High	High	High	High	Not Found	0.5533	0.64	K.FSMAFIKLPVGTEGAVPRLWETR.R	[385-407]		Not Used
	Confidence	PSM Ambiguity	Annotated Sequence	Modifications	# Protein Groups	# Proteins	Master Protein Accessions	Protein Accessions	# Missed Cleavages	Charge	DeltaScore	DeltaCn	Rank	m/z [Da]	MH+ [Da]	Theo. MH+ [Da]	DeltaM [ppm]	Deltam/z [Da]	Activation Type	MS Order	Isolation Interference [%]	Average Reporter S/N	Ion Inject Time [ms]	RT [min]	First Scan	Spectrum File	Abundance: 113	Abundance: 114	Abundance: 115	Abundance: 116	Abundance: 117	Abundance: 118	Abundance: 119	XCorr	Percolator q-Value	Percolator PEP
	High	Unambiguous	[K].FSmAFIKLPVGTEGAVPRLWETR.[R]	M3(Oxidation)	1	1	c71126_g2	c71126_g2	2	4	0.0781	0	1	656.105	2621.4	2621.39	2.39	0.00157	HCD (High Energy Collision Dissociation)	MS2	20.5936	3.2	50	39.4901	10096	SHUTSA.raw	5.2	5	2.6	2.9	2.5	4.5	2.9	0.64	0	0.5533
High	c55940_g1	0	0.248	5	1	24	1	1	122	14.3	6.62	0	1														High	High	High	High	High	High	High
Checked	Annotated Sequence	Modifications in Master Proteins	Qvality PEP	Qvality q-value	# Protein Groups	# Proteins	# PSMs	Master Protein Accessions	Positions in Master Proteins	# Missed Cleavages	Theo. MH+ [Da]	# Razor Quan Results	Abundance Ratio: (114) / (113)	Abundance Ratio: (116) / (113)	Abundance Ratio: (117) / (113)	Abundance Ratio: (118) / (113)	Abundance Ratio: (119) / (113)	Abundances (Grouped): 113	Abundances (Grouped): 114	Abundances (Grouped): 115	Abundances (Grouped): 116	Abundances (Grouped): 117	Abundances (Grouped): 118	Abundances (Grouped): 119	Abundances (Grouped): 121	Quan Info	Found in Sample: [S98] F12: 114, Sample	Found in Sample: [S99] F12: 115, Sample	Found in Sample: [S100] F12: 116, Sample	Found in Sample: [S101] F12: 117, Sample	Found in Sample: [S102] F12: 118, Sample	Found in Sample: [S103] F12: 119, Sample	Found in Sample: [S104] F12: 121, Sample	Percolator PEP (by Search Engine): Sequest HT	XCorr (by Search Engine): Sequest HT	Sequence in Protein	Positions in Protein	Peptide Group Modifications in Protein	Quan Usage
FALSE	[K].IGRAHV.[-]		1	0	1	2	24	c55940_g1	c55940_g1 [117-122]	1	652.389	0														No Quan Labels	High	High	High	High	High	High	High	0.5651	0.54	K.IGRAHV.-	[117-122]		Not Used
	Confidence	PSM Ambiguity	Annotated Sequence	Modifications	# Protein Groups	# Proteins	Master Protein Accessions	Protein Accessions	# Missed Cleavages	Charge	DeltaScore	DeltaCn	Rank	m/z [Da]	MH+ [Da]	Theo. MH+ [Da]	DeltaM [ppm]	Deltam/z [Da]	Activation Type	MS Order	Isolation Interference [%]	Average Reporter S/N	Ion Inject Time [ms]	RT [min]	First Scan	Spectrum File	Abundance: 113	Abundance: 114	Abundance: 115	Abundance: 116	Abundance: 117	Abundance: 118	Abundance: 119	XCorr	Percolator q-Value	Percolator PEP
	High	Unambiguous	[K].IGRAHV.[-]		1	2	c55940_g1	c31879_g2; c55940_g1	1	2	0.0556	0	1	326.697	652.387	652.389	-3.49	-0.00114	HCD (High Energy Collision Dissociation)	MS2	44.4776	46.1	21.237	31.1224	7829	SHUTSA.raw	21.5	45	29.3	57.4	52.8	45.2	83.1	0.54	0	0.5651
	High	Unambiguous	[K].IGRAHV.[-]		1	2	c55940_g1	c31879_g2; c55940_g1	1	2	0.1333	0	1	326.698	652.389	652.389	-0.21	-7e-05	HCD (High Energy Collision Dissociation)	MS2	57.5244	86.1	35.794	55.5116	14041	SHUTSA.raw	39.7	91.6	50.3	132	110.4	71.9	147.3	0.3	0	0.65
	High	Selected	[K].IGRAHV.[-]		1	2	c55940_g1	c31879_g2; c55940_g1	1	2	0.0213	0	1	326.698	652.388	652.389	-1.15	-0.00037	HCD (High Energy Collision Dissociation)	MS2	62.184	42.8	19.84	29.5033	7401	SHUTSA.raw	21.5	40.8	27	56.2	50	40.9	79.2	0.47	0	0.5956
	High	Unambiguous	[K].IGRAHV.[-]		1	2	c55940_g1	c31879_g2; c55940_g1	1	2	0.0909	0	1	326.699	652.39	652.389	1.38	0.00045	HCD (High Energy Collision Dissociation)	MS2	68.3654	41.6	17.095	39.0251	9979	SHUTSA.raw	55.3	38.1	22.4	51.1	43.3	39.8	61.3	0.33	0	0.6256
	High	Selected	[K].IGRAHV.[-]		1	2	c55940_g1	c31879_g2; c55940_g1	1	2	0.037	0	1	326.699	652.39	652.389	1.94	0.00063	HCD (High Energy Collision Dissociation)	MS2	65.383	50.8	24.947	60.3884	15201	SHUTSA.raw	21	52.8	27.9	74.7	66.3	42.4	92.6	0.27	0	0.696
	High	Selected	[K].IGRAHV.[-]		1	2	c55940_g1	c31879_g2; c55940_g1	1	2		0	3	326.698	652.389	652.389	0.72	0.00024	HCD (High Energy Collision Dissociation)	MS2	57.3506	37.3	14.426	60.5959	15250	SHUTSA.raw	18.6	41.4	22.5	53.8	48.7	34.2	58.3	0.25	0	0.6818
	High	Selected	[K].IGRAHV.[-]		1	2	c55940_g1	c31879_g2; c55940_g1	1	2	0.0233	0	1	326.697	652.387	652.389	-2.27	-0.00074	HCD (High Energy Collision Dissociation)	MS2	64.5476	96.8	47.084	29.1314	7304	SHUTSA.raw	49.1	91.8	60.6	137.7	117.6	91	169.1	0.43	0	0.6831
	High	Selected	[K].IGRAHV.[-]		1	2	c55940_g1	c31879_g2; c55940_g1	1	2	0.04	0	1	326.698	652.389	652.389	0.35	0.00011	HCD (High Energy Collision Dissociation)	MS2	77.9104	33.4	17.339	66.5685	16576	SHUTSA.raw	25.9	35	21.2	47.9	37	27.9	56.5	0.25	0	0.768
	Low	Unambiguous	[K].IGRAHV.[-]		1	2	c55940_g1	c31879_g2; c55940_g1	1	2	0.1351	0	1	326.699	652.391	652.389	3.34	0.00109	HCD (High Energy Collision Dissociation)	MS2	63.0764	59.4	24.976	30.0755	7552	SHUTSA.raw	31.7	59.2	37.4	81.5	74	49.5	106.1	0.37	0.8974	1
	Low	Unambiguous	[K].IGRAHV.[-]		1	2	c55940_g1	c31879_g2; c55940_g1	1	2	0.2083	0	1	326.699	652.391	652.389	2.59	0.00085	HCD (High Energy Collision Dissociation)	MS2	69.6936	25	11.646	54.4246	13792	SHUTSA.raw	13.3	27.2	16.6	35.3	27.7	24.1	43	0.24	0.8974	1
	Low	Unambiguous	[K].IGRAHV.[-]		1	2	c55940_g1	c31879_g2; c55940_g1	1	2	0.1154	0	1	326.699	652.39	652.389	1.75	0.00057	HCD (High Energy Collision Dissociation)	MS2	55.6577	31.1	15.692	47.2412	12026	SHUTSA.raw	16.3	34.7	18.3	41.6	34	30.7	58.9	0.26	0.8974	1
	Low	Unambiguous	[K].IGRAHV.[-]		1	2	c55940_g1	c31879_g2; c55940_g1	1	2	0.12	0	1	326.698	652.389	652.389	-0.12	-4e-05	HCD (High Energy Collision Dissociation)	MS2	68.9786	47.7	16.903	52.0103	13226	SHUTSA.raw	21.3	50.3	28	70.5	62.5	41.7	79.4	0.25	0.8974	1
	Low	Unambiguous	[K].IGRAHV.[-]		1	2	c55940_g1	c31879_g2; c55940_g1	1	2	0.1481	0	1	326.699	652.391	652.389	3.9	0.00127	HCD (High Energy Collision Dissociation)	MS2	71.7921	54.8	27.348	49.8429	12703	SHUTSA.raw	29.3	58.5	34.6	72.6	71.9	51	89.2	0.27	0.8974	1
	Low	Rejected	[K].IGRAHV.[-]		1	2	c55940_g1	c31879_g2; c55940_g1	1	2		0.0179	2	326.698	652.388	652.389	-0.87	-0.00028	HCD (High Energy Collision Dissociation)	MS2	83.0873	55.5	28.191	22.7784	5417	SHUTSA.raw	36.2	124.7	28.6	45.8	45.7	40.5	81.5	0.55	0.9015	1
	Low	Unambiguous	[K].IGRAHV.[-]		1	2	c55940_g1	c31879_g2; c55940_g1	1	2	0.1379	0	1	326.698	652.389	652.389	0.26	8e-05	HCD (High Energy Collision Dissociation)	MS2	63.8033	32.2	13.628	59.6883	15031	SHUTSA.raw	14.9	31.7	18.7	45.1	43.2	27.8	54.8	0.29	0.9039	1
	Low	Unambiguous	[K].IGRAHV.[-]		1	2	c55940_g1	c31879_g2; c55940_g1	1	2	0.1538	0	1	326.697	652.386	652.389	-4.52	-0.00147	HCD (High Energy Collision Dissociation)	MS2	51.7725	64.6	27.467	31.9783	8077	SHUTSA.raw	34.4	71.6	37.6	91.3	71.5	60.5	113.4	0.39	0.9039	1
	Low	Unambiguous	[K].IGRAHV.[-]		1	2	c55940_g1	c31879_g2; c55940_g1	1	2	0.1379	0	1	326.698	652.389	652.389	0.63	0.00021	HCD (High Energy Collision Dissociation)	MS2	27.335	46.1	20.298	62.5793	15717	SHUTSA.raw	20.6	51.9	26.5	64.8	59	41.9	82	0.29	0.9039	1
	Low	Selected	[K].IGRAHV.[-]		1	2	c55940_g1	c31879_g2; c55940_g1	1	2	0	0	1	326.698	652.388	652.389	-1.34	-0.00044	HCD (High Energy Collision Dissociation)	MS2	45.5694	80.2	43.975	31.5598	7957	SHUTSA.raw	42.7	81.9	44	113.1	92.6	77.8	131.9	0.44	0.9041	1
	Low	Unambiguous	[K].IGRAHV.[-]		1	2	c55940_g1	c31879_g2; c55940_g1	1	2	0.12	0	1	326.697	652.387	652.389	-3.3	-0.00108	HCD (High Energy Collision Dissociation)	MS2	56.0535	54.1	25.543	53.7794	13648	SHUTSA.raw	25.4	60.9	29.1	77.4	67.3	47.5	98	0.25	0.9101	1
	Low	Selected	[K].IGRAHV.[-]		1	2	c55940_g1	c31879_g2; c55940_g1	1	2	0.04	0	1	326.698	652.388	652.389	-0.77	-0.00025	HCD (High Energy Collision Dissociation)	MS2	54.1961	31.5	18.987	40.5903	10383	SHUTSA.raw	14	29.9	16.8	44.9	39.1	27.7	53	0.25	0.9176	1
	Low	Rejected	[K].IGRAHV.[-]		1	2	c55940_g1	c31879_g2; c55940_g1	1	2		0.0323	2	326.698	652.389	652.389	-0.12	-4e-05	HCD (High Energy Collision Dissociation)	MS2	70.3964	46.2	17.753	51.2118	13036	SHUTSA.raw	22.3	50.9	28.7	68	55.7	40.6	78.3	0.3	0.9187	1
	Low	Unambiguous	[K].IGRAHV.[-]		1	2	c55940_g1	c31879_g2; c55940_g1	1	2	0.0536	0	1	326.698	652.389	652.389	0.63	0.00021	HCD (High Energy Collision Dissociation)	MS2	46.216	35.5	15.094	34.2863	8703	SHUTSA.raw	19.6	30.2	23.6	45.6	44.4	36.3	60.7	0.56	0.9272	1
	Low	Unambiguous	[K].IGRAHV.[-]		1	2	c55940_g1	c31879_g2; c55940_g1	1	2	0.2083	0	1	326.698	652.39	652.389	0.91	0.0003	HCD (High Energy Collision Dissociation)	MS2	65.2943	48.3	22.718	30.9282	7773	SHUTSA.raw	27.4	45.1	28.4	62.8	48.2	52.9	83.9	0.48	0.9301	1
	Low	Rejected	[K].IGRAHV.[-]		1	2	c55940_g1	c31879_g2; c55940_g1	1	2		0.0417	2	326.698	652.389	652.389	0.54	0.00017	HCD (High Energy Collision Dissociation)	MS2	73.117	95.7	50	34.4577	8749	SHUTSA.raw	41.4	100.7	59.3	131.9	116	93	167.5	0.46	0.9536	1
High	c67876_g1	0	0.156	2	1	4	1	1	372	41.7	8.78	0	1														High	High	High	High	High	High	High
Checked	Annotated Sequence	Modifications in Master Proteins	Qvality PEP	Qvality q-value	# Protein Groups	# Proteins	# PSMs	Master Protein Accessions	Positions in Master Proteins	# Missed Cleavages	Theo. MH+ [Da]	# Razor Quan Results	Abundance Ratio: (114) / (113)	Abundance Ratio: (116) / (113)	Abundance Ratio: (117) / (113)	Abundance Ratio: (118) / (113)	Abundance Ratio: (119) / (113)	Abundances (Grouped): 113	Abundances (Grouped): 114	Abundances (Grouped): 115	Abundances (Grouped): 116	Abundances (Grouped): 117	Abundances (Grouped): 118	Abundances (Grouped): 119	Abundances (Grouped): 121	Quan Info	Found in Sample: [S98] F12: 114, Sample	Found in Sample: [S99] F12: 115, Sample	Found in Sample: [S100] F12: 116, Sample	Found in Sample: [S101] F12: 117, Sample	Found in Sample: [S102] F12: 118, Sample	Found in Sample: [S103] F12: 119, Sample	Found in Sample: [S104] F12: 121, Sample	Percolator PEP (by Search Engine): Sequest HT	XCorr (by Search Engine): Sequest HT	Sequence in Protein	Positions in Protein	Peptide Group Modifications in Protein	Quan Usage
FALSE	[K].WLKLADV.[-]		1	0	1	1	4	c67876_g1	c67876_g1 [366-372]	1	844.493	0														No Quan Labels	High	High	High	High	High	High	Not Found	0.6982	0.78	K.WLKLADV.-	[366-372]		Not Used
	Confidence	PSM Ambiguity	Annotated Sequence	Modifications	# Protein Groups	# Proteins	Master Protein Accessions	Protein Accessions	# Missed Cleavages	Charge	DeltaScore	DeltaCn	Rank	m/z [Da]	MH+ [Da]	Theo. MH+ [Da]	DeltaM [ppm]	Deltam/z [Da]	Activation Type	MS Order	Isolation Interference [%]	Average Reporter S/N	Ion Inject Time [ms]	RT [min]	First Scan	Spectrum File	Abundance: 113	Abundance: 114	Abundance: 115	Abundance: 116	Abundance: 117	Abundance: 118	Abundance: 119	XCorr	Percolator q-Value	Percolator PEP
	High	Rejected	[K].WLKLADV.[-]		1	1	c67876_g1	c67876_g1	1	2	0.0385	0	1	422.752	844.498	844.493	5.86	0.00248	HCD (High Energy Collision Dissociation)	MS2	7.02397	12.6	26.397	20.4	4592	SHUTSA.raw	23.5	12.4	19.6	10.5	8.5	13.1	12.8	0.78	0	0.6982
	Low	Selected	[K].WLKLADV.[-]		1	1	c67876_g1	c67876_g1	1	2	0.023	0	1	422.754	844.5	844.493	8.39	0.00354	HCD (High Energy Collision Dissociation)	MS2	9.38395	40.7	50	21.9704	5152	SHUTSA.raw	65	36.4	53.4	36	34.8	49.6	50.7	0.87	0.8856	1
	Low	Rejected	[K].WLKLADV.[-]		1	1	c67876_g1	c67876_g1	1	2		0.0395	2	422.753	844.498	844.493	6.08	0.00257	HCD (High Energy Collision Dissociation)	MS2	10.7453	47.5	37.213	22.4468	5290	SHUTSA.raw	51.3	56.3	55.3	33.5	58.9	69.8	54.7	0.73	0.8974	1
	Low	Selected	[K].WLKLADV.[-]		1	1	c67876_g1	c67876_g1	1	2	0.0482	0	1	422.753	844.499	844.493	6.95	0.00293	HCD (High Energy Collision Dissociation)	MS2	0	29.5	50	21.2522	4877	SHUTSA.raw	49.8	31.7	36.6	26.9	24.6	35.2	31.3	0.83	0.9078	1
High	c104715_g1	0	0.14	3	1	1	1	1	266	29.8	8.25	0	1														High	High	High	High	High	High	High
Checked	Annotated Sequence	Modifications in Master Proteins	Qvality PEP	Qvality q-value	# Protein Groups	# Proteins	# PSMs	Master Protein Accessions	Positions in Master Proteins	# Missed Cleavages	Theo. MH+ [Da]	# Razor Quan Results	Abundance Ratio: (114) / (113)	Abundance Ratio: (116) / (113)	Abundance Ratio: (117) / (113)	Abundance Ratio: (118) / (113)	Abundance Ratio: (119) / (113)	Abundances (Grouped): 113	Abundances (Grouped): 114	Abundances (Grouped): 115	Abundances (Grouped): 116	Abundances (Grouped): 117	Abundances (Grouped): 118	Abundances (Grouped): 119	Abundances (Grouped): 121	Quan Info	Found in Sample: [S98] F12: 114, Sample	Found in Sample: [S99] F12: 115, Sample	Found in Sample: [S100] F12: 116, Sample	Found in Sample: [S101] F12: 117, Sample	Found in Sample: [S102] F12: 118, Sample	Found in Sample: [S103] F12: 119, Sample	Found in Sample: [S104] F12: 121, Sample	Percolator PEP (by Search Engine): Sequest HT	XCorr (by Search Engine): Sequest HT	Sequence in Protein	Positions in Protein	Peptide Group Modifications in Protein	Quan Usage
FALSE	[K].TPRKPKASR.[S]		1	0	1	1	1	c104715_g1	c104715_g1 [175-183]	2	1040.63	0														No Quan Labels	High	High	High	High	High	High	Not Found	0.7239	0.68	K.TPRKPKASR.S	[175-183]		Not Used
	Confidence	PSM Ambiguity	Annotated Sequence	Modifications	# Protein Groups	# Proteins	Master Protein Accessions	Protein Accessions	# Missed Cleavages	Charge	DeltaScore	DeltaCn	Rank	m/z [Da]	MH+ [Da]	Theo. MH+ [Da]	DeltaM [ppm]	Deltam/z [Da]	Activation Type	MS Order	Isolation Interference [%]	Average Reporter S/N	Ion Inject Time [ms]	RT [min]	First Scan	Spectrum File	Abundance: 113	Abundance: 114	Abundance: 115	Abundance: 116	Abundance: 117	Abundance: 118	Abundance: 119	XCorr	Percolator q-Value	Percolator PEP
	High	Unambiguous	[K].TPRKPKASR.[S]		1	1	c104715_g1	c104715_g1	2	2	0.1029	0	1	520.825	1040.64	1040.63	9.65	0.00502	HCD (High Energy Collision Dissociation)	MS2		24.7	50	22.8449	5442	SHUTSA.raw	35.9	24.6	40.2	26	21.5	27.4	21.8	0.68	0	0.7239
High	c188819_g1	0	0.115	13	1	1	1	1	61	6.9	7.25	0	1														Not Found	Not Found	Not Found	Low	Low	Low	Low
Checked	Annotated Sequence	Modifications in Master Proteins	Qvality PEP	Qvality q-value	# Protein Groups	# Proteins	# PSMs	Master Protein Accessions	Positions in Master Proteins	# Missed Cleavages	Theo. MH+ [Da]	# Razor Quan Results	Abundance Ratio: (114) / (113)	Abundance Ratio: (116) / (113)	Abundance Ratio: (117) / (113)	Abundance Ratio: (118) / (113)	Abundance Ratio: (119) / (113)	Abundances (Grouped): 113	Abundances (Grouped): 114	Abundances (Grouped): 115	Abundances (Grouped): 116	Abundances (Grouped): 117	Abundances (Grouped): 118	Abundances (Grouped): 119	Abundances (Grouped): 121	Quan Info	Found in Sample: [S98] F12: 114, Sample	Found in Sample: [S99] F12: 115, Sample	Found in Sample: [S100] F12: 116, Sample	Found in Sample: [S101] F12: 117, Sample	Found in Sample: [S102] F12: 118, Sample	Found in Sample: [S103] F12: 119, Sample	Found in Sample: [S104] F12: 121, Sample	Percolator PEP (by Search Engine): Sequest HT	XCorr (by Search Engine): Sequest HT	Sequence in Protein	Positions in Protein	Peptide Group Modifications in Protein	Quan Usage
FALSE	[R].QGTMKGIP.[-]		1	0	1	1	1	c188819_g1	c188819_g1 [54-61]	1	1135.64	0														No Quan Values	Not Found	Not Found	Low	Low	Low	Low	Not Found	0.768	0.55	R.QGTMKGIP.-	[54-61]		Not Used
	Confidence	PSM Ambiguity	Annotated Sequence	Modifications	# Protein Groups	# Proteins	Master Protein Accessions	Protein Accessions	# Missed Cleavages	Charge	DeltaScore	DeltaCn	Rank	m/z [Da]	MH+ [Da]	Theo. MH+ [Da]	DeltaM [ppm]	Deltam/z [Da]	Activation Type	MS Order	Isolation Interference [%]	Average Reporter S/N	Ion Inject Time [ms]	RT [min]	First Scan	Spectrum File	Abundance: 113	Abundance: 114	Abundance: 115	Abundance: 116	Abundance: 117	Abundance: 118	Abundance: 119	XCorr	Percolator q-Value	Percolator PEP
	Low	Unambiguous	[R].qGTMKGIP.[-]	N-Term(iTRAQ8plex)	1	1	c188819_g1	c188819_g1	1	7	0.0727	0	1	163.098	1135.64	1135.64	-1.06	-0.00017	HCD (High Energy Collision Dissociation)	MS2	52.0097	9.4	38.46	48.157	12256	SHUTSA.raw				32.1	32	4.5	6.9	0.55	0.06987	0.768
High	c77970_g8	1.111	0.047	6	2	2	2	1	270	28.2	6.58	0	2														Low	Low	Low	Low	Low	Low	Low
Checked	Annotated Sequence	Modifications in Master Proteins	Qvality PEP	Qvality q-value	# Protein Groups	# Proteins	# PSMs	Master Protein Accessions	Positions in Master Proteins	# Missed Cleavages	Theo. MH+ [Da]	# Razor Quan Results	Abundance Ratio: (114) / (113)	Abundance Ratio: (116) / (113)	Abundance Ratio: (117) / (113)	Abundance Ratio: (118) / (113)	Abundance Ratio: (119) / (113)	Abundances (Grouped): 113	Abundances (Grouped): 114	Abundances (Grouped): 115	Abundances (Grouped): 116	Abundances (Grouped): 117	Abundances (Grouped): 118	Abundances (Grouped): 119	Abundances (Grouped): 121	Quan Info	Found in Sample: [S98] F12: 114, Sample	Found in Sample: [S99] F12: 115, Sample	Found in Sample: [S100] F12: 116, Sample	Found in Sample: [S101] F12: 117, Sample	Found in Sample: [S102] F12: 118, Sample	Found in Sample: [S103] F12: 119, Sample	Found in Sample: [S104] F12: 121, Sample	Percolator PEP (by Search Engine): Sequest HT	XCorr (by Search Engine): Sequest HT	Sequence in Protein	Positions in Protein	Peptide Group Modifications in Protein	Quan Usage
FALSE	[R].LQINGLLSSK.[G]		1	0.800029	1	1	1	c77970_g8	c77970_g8 [74-83]	0	1072.64	0														No Quan Labels	Low	Low	Low	Low	Low	Low	Not Found	0.898	0.88	R.LQINGLLSSK.G	[74-83]		Not Used
	Confidence	PSM Ambiguity	Annotated Sequence	Modifications	# Protein Groups	# Proteins	Master Protein Accessions	Protein Accessions	# Missed Cleavages	Charge	DeltaScore	DeltaCn	Rank	m/z [Da]	MH+ [Da]	Theo. MH+ [Da]	DeltaM [ppm]	Deltam/z [Da]	Activation Type	MS Order	Isolation Interference [%]	Average Reporter S/N	Ion Inject Time [ms]	RT [min]	First Scan	Spectrum File	Abundance: 113	Abundance: 114	Abundance: 115	Abundance: 116	Abundance: 117	Abundance: 118	Abundance: 119	XCorr	Percolator q-Value	Percolator PEP
	Low	Selected	[R].LQINGLLSSK.[G]		1	1	c77970_g8	c77970_g8	0	3		0.0435	2	358.219	1072.64	1072.64	6.94	0.00248	HCD (High Energy Collision Dissociation)	MS2	48.6722	10	22.984	22.7672	5411	SHUTSA.raw	11.6	7	11.6	11.5	8	19.6	10.7	0.88	0.5663	0.898
FALSE	[R].VGIHCR.[FW]		1	0.921339	1	2	1	c77970_g8	c77970_g8 [132-137]	0	741.382	0														No Quan Labels	Low	Low	Low	Low	Low	Low	Not Found	1	0.28	R.VGIHCR.W	[132-137]		Not Used
	Confidence	PSM Ambiguity	Annotated Sequence	Modifications	# Protein Groups	# Proteins	Master Protein Accessions	Protein Accessions	# Missed Cleavages	Charge	DeltaScore	DeltaCn	Rank	m/z [Da]	MH+ [Da]	Theo. MH+ [Da]	DeltaM [ppm]	Deltam/z [Da]	Activation Type	MS Order	Isolation Interference [%]	Average Reporter S/N	Ion Inject Time [ms]	RT [min]	First Scan	Spectrum File	Abundance: 113	Abundance: 114	Abundance: 115	Abundance: 116	Abundance: 117	Abundance: 118	Abundance: 119	XCorr	Percolator q-Value	Percolator PEP
	Low	Unambiguous	[R].VGIHcR.[FW]	C5(Carbamidomethyl)	1	2	c77970_g8	c77970_g5; c77970_g8	0	2	0.0714	0	1	371.193	741.379	741.382	-4.8	-0.00178	HCD (High Energy Collision Dissociation)	MS2	54.6324	9.7	50	40.398	10337	SHUTSA.raw	17.8	10	9.4	12.9	9.4	11.8	6	0.28	0.9198	1
High	c74668_g1	1.1	0.034	2	2	2	2	1	525	59.7	7.78	0	2														Low	Low	Low	Low	Low	Low	Low
Checked	Annotated Sequence	Modifications in Master Proteins	Qvality PEP	Qvality q-value	# Protein Groups	# Proteins	# PSMs	Master Protein Accessions	Positions in Master Proteins	# Missed Cleavages	Theo. MH+ [Da]	# Razor Quan Results	Abundance Ratio: (114) / (113)	Abundance Ratio: (116) / (113)	Abundance Ratio: (117) / (113)	Abundance Ratio: (118) / (113)	Abundance Ratio: (119) / (113)	Abundances (Grouped): 113	Abundances (Grouped): 114	Abundances (Grouped): 115	Abundances (Grouped): 116	Abundances (Grouped): 117	Abundances (Grouped): 118	Abundances (Grouped): 119	Abundances (Grouped): 121	Quan Info	Found in Sample: [S98] F12: 114, Sample	Found in Sample: [S99] F12: 115, Sample	Found in Sample: [S100] F12: 116, Sample	Found in Sample: [S101] F12: 117, Sample	Found in Sample: [S102] F12: 118, Sample	Found in Sample: [S103] F12: 119, Sample	Found in Sample: [S104] F12: 121, Sample	Percolator PEP (by Search Engine): Sequest HT	XCorr (by Search Engine): Sequest HT	Sequence in Protein	Positions in Protein	Peptide Group Modifications in Protein	Quan Usage
FALSE	[K].LTKSSKK.[S]		1	0.800029	1	1	1	c74668_g1	c74668_g1 [511-517]	2	791.499	0														No Quan Labels	Low	Low	Low	Low	Low	Low	Not Found	0.9248	0.78	K.LTKSSKK.S	[511-517]		Not Used
	Confidence	PSM Ambiguity	Annotated Sequence	Modifications	# Protein Groups	# Proteins	Master Protein Accessions	Protein Accessions	# Missed Cleavages	Charge	DeltaScore	DeltaCn	Rank	m/z [Da]	MH+ [Da]	Theo. MH+ [Da]	DeltaM [ppm]	Deltam/z [Da]	Activation Type	MS Order	Isolation Interference [%]	Average Reporter S/N	Ion Inject Time [ms]	RT [min]	First Scan	Spectrum File	Abundance: 113	Abundance: 114	Abundance: 115	Abundance: 116	Abundance: 117	Abundance: 118	Abundance: 119	XCorr	Percolator q-Value	Percolator PEP
	Low	Unambiguous	[K].LTKSSKK.[S]		1	1	c74668_g1	c74668_g1	2	2	0.0897	0	1	396.249	791.491	791.499	-8.95	-0.00354	HCD (High Energy Collision Dissociation)	MS2	55.5852	98	50	23.5293	5717	SHUTSA.raw	101.6	89.2	124.3	142	96.2	100.2	130.6	0.78	0.5663	0.9248
FALSE	[K].VKLTKSSK.[K]		1	0.916083	1	1	1	c74668_g1	c74668_g1 [509-516]	2	890.567	0														No Quan Labels	Low	Low	Low	Low	Low	Low	Not Found	1	0.7	K.VKLTKSSK.K	[509-516]		Not Used
	Confidence	PSM Ambiguity	Annotated Sequence	Modifications	# Protein Groups	# Proteins	Master Protein Accessions	Protein Accessions	# Missed Cleavages	Charge	DeltaScore	DeltaCn	Rank	m/z [Da]	MH+ [Da]	Theo. MH+ [Da]	DeltaM [ppm]	Deltam/z [Da]	Activation Type	MS Order	Isolation Interference [%]	Average Reporter S/N	Ion Inject Time [ms]	RT [min]	First Scan	Spectrum File	Abundance: 113	Abundance: 114	Abundance: 115	Abundance: 116	Abundance: 117	Abundance: 118	Abundance: 119	XCorr	Percolator q-Value	Percolator PEP
	Low	Selected	[K].VKLTKSSK.[K]		1	1	c74668_g1	c74668_g1	2	2		0.0411	2	445.79	890.573	890.567	6.51	0.0029	HCD (High Energy Collision Dissociation)	MS2	50.3075	75.8	50	23.2706	5620	SHUTSA.raw	127.6	79.3	156.3	34.1	29.3	75.1	104.5	0.7	0.9106	1
High	c121497_g1	1	0.033	2	1	1	1	1	476	55.2	9.58	0	1														Low	Low	Low	Low	Low	Low	Low
Checked	Annotated Sequence	Modifications in Master Proteins	Qvality PEP	Qvality q-value	# Protein Groups	# Proteins	# PSMs	Master Protein Accessions	Positions in Master Proteins	# Missed Cleavages	Theo. MH+ [Da]	# Razor Quan Results	Abundance Ratio: (114) / (113)	Abundance Ratio: (116) / (113)	Abundance Ratio: (117) / (113)	Abundance Ratio: (118) / (113)	Abundance Ratio: (119) / (113)	Abundances (Grouped): 113	Abundances (Grouped): 114	Abundances (Grouped): 115	Abundances (Grouped): 116	Abundances (Grouped): 117	Abundances (Grouped): 118	Abundances (Grouped): 119	Abundances (Grouped): 121	Quan Info	Found in Sample: [S98] F12: 114, Sample	Found in Sample: [S99] F12: 115, Sample	Found in Sample: [S100] F12: 116, Sample	Found in Sample: [S101] F12: 117, Sample	Found in Sample: [S102] F12: 118, Sample	Found in Sample: [S103] F12: 119, Sample	Found in Sample: [S104] F12: 121, Sample	Percolator PEP (by Search Engine): Sequest HT	XCorr (by Search Engine): Sequest HT	Sequence in Protein	Positions in Protein	Peptide Group Modifications in Protein	Quan Usage
FALSE	[R].LQAKREVR.[E]		1	0.800029	1	1	1	c121497_g1	c121497_g1 [136-143]	2	999.606	0														No Quan Labels	Low	Low	Low	Low	Low	Low	Not Found	0.9259	0.77	R.LQAKREVR.E	[136-143]		Not Used
	Confidence	PSM Ambiguity	Annotated Sequence	Modifications	# Protein Groups	# Proteins	Master Protein Accessions	Protein Accessions	# Missed Cleavages	Charge	DeltaScore	DeltaCn	Rank	m/z [Da]	MH+ [Da]	Theo. MH+ [Da]	DeltaM [ppm]	Deltam/z [Da]	Activation Type	MS Order	Isolation Interference [%]	Average Reporter S/N	Ion Inject Time [ms]	RT [min]	First Scan	Spectrum File	Abundance: 113	Abundance: 114	Abundance: 115	Abundance: 116	Abundance: 117	Abundance: 118	Abundance: 119	XCorr	Percolator q-Value	Percolator PEP
	Low	Unambiguous	[R].LQAKREVR.[E]		1	1	c121497_g1	c121497_g1	2	2	0.0909	0	1	500.311	999.615	999.606	9.62	0.00481	HCD (High Energy Collision Dissociation)	MS2	26.6014	25	13.763	5.3148	1064	SHUTSA.raw	22.1	42.7	100.8	12.6	5.1	9.1	7.5	0.77	0.5663	0.9259
High	c71034_g1	0.917	0.024	2	1	1	1	1	569	64.4	8.35	0	1														Low	Low	Low	Low	Low	Low	Low
Checked	Annotated Sequence	Modifications in Master Proteins	Qvality PEP	Qvality q-value	# Protein Groups	# Proteins	# PSMs	Master Protein Accessions	Positions in Master Proteins	# Missed Cleavages	Theo. MH+ [Da]	# Razor Quan Results	Abundance Ratio: (114) / (113)	Abundance Ratio: (116) / (113)	Abundance Ratio: (117) / (113)	Abundance Ratio: (118) / (113)	Abundance Ratio: (119) / (113)	Abundances (Grouped): 113	Abundances (Grouped): 114	Abundances (Grouped): 115	Abundances (Grouped): 116	Abundances (Grouped): 117	Abundances (Grouped): 118	Abundances (Grouped): 119	Abundances (Grouped): 121	Quan Info	Found in Sample: [S98] F12: 114, Sample	Found in Sample: [S99] F12: 115, Sample	Found in Sample: [S100] F12: 116, Sample	Found in Sample: [S101] F12: 117, Sample	Found in Sample: [S102] F12: 118, Sample	Found in Sample: [S103] F12: 119, Sample	Found in Sample: [S104] F12: 121, Sample	Percolator PEP (by Search Engine): Sequest HT	XCorr (by Search Engine): Sequest HT	Sequence in Protein	Positions in Protein	Peptide Group Modifications in Protein	Quan Usage
FALSE	[R].RKASQIELK.[N]		1	0.800029	1	1	1	c71034_g1	c71034_g1 [232-240]	2	1072.65	0														No Quan Labels	Low	Low	Low	Low	Low	Low	Not Found	0.9458	1.16	R.RKASQIELK.N	[232-240]		Not Used
	Confidence	PSM Ambiguity	Annotated Sequence	Modifications	# Protein Groups	# Proteins	Master Protein Accessions	Protein Accessions	# Missed Cleavages	Charge	DeltaScore	DeltaCn	Rank	m/z [Da]	MH+ [Da]	Theo. MH+ [Da]	DeltaM [ppm]	Deltam/z [Da]	Activation Type	MS Order	Isolation Interference [%]	Average Reporter S/N	Ion Inject Time [ms]	RT [min]	First Scan	Spectrum File	Abundance: 113	Abundance: 114	Abundance: 115	Abundance: 116	Abundance: 117	Abundance: 118	Abundance: 119	XCorr	Percolator q-Value	Percolator PEP
	Low	Unambiguous	[R].RKASQIELK.[N]		1	1	c71034_g1	c71034_g1	2	3	0.1034	0	1	358.221	1072.65	1072.65	0.9	0.00032	HCD (High Energy Collision Dissociation)	MS2	47.9214	17.2	50	22.5928	5342	SHUTSA.raw	18.1	18.4	17.9	21.4	11.7	31.3	18.9	1.16	0.5663	0.9458
High	c59436_g2	1	0.018	1	1	1	1	1	585	66.2	5.77	0	1														Low	Low	Low	Low	Low	Low	Low
Checked	Annotated Sequence	Modifications in Master Proteins	Qvality PEP	Qvality q-value	# Protein Groups	# Proteins	# PSMs	Master Protein Accessions	Positions in Master Proteins	# Missed Cleavages	Theo. MH+ [Da]	# Razor Quan Results	Abundance Ratio: (114) / (113)	Abundance Ratio: (116) / (113)	Abundance Ratio: (117) / (113)	Abundance Ratio: (118) / (113)	Abundance Ratio: (119) / (113)	Abundances (Grouped): 113	Abundances (Grouped): 114	Abundances (Grouped): 115	Abundances (Grouped): 116	Abundances (Grouped): 117	Abundances (Grouped): 118	Abundances (Grouped): 119	Abundances (Grouped): 121	Quan Info	Found in Sample: [S98] F12: 114, Sample	Found in Sample: [S99] F12: 115, Sample	Found in Sample: [S100] F12: 116, Sample	Found in Sample: [S101] F12: 117, Sample	Found in Sample: [S102] F12: 118, Sample	Found in Sample: [S103] F12: 119, Sample	Found in Sample: [S104] F12: 121, Sample	Percolator PEP (by Search Engine): Sequest HT	XCorr (by Search Engine): Sequest HT	Sequence in Protein	Positions in Protein	Peptide Group Modifications in Protein	Quan Usage
FALSE	[R].IAKNKDR.[E]		1	0.800029	1	1	1	c59436_g2	c59436_g2 [101-107]	2	844.5	0														No Quan Labels	Low	Low	Low	Low	Low	Low	Not Found	0.9584	0.77	R.IAKNKDR.E	[101-107]		Not Used
	Confidence	PSM Ambiguity	Annotated Sequence	Modifications	# Protein Groups	# Proteins	Master Protein Accessions	Protein Accessions	# Missed Cleavages	Charge	DeltaScore	DeltaCn	Rank	m/z [Da]	MH+ [Da]	Theo. MH+ [Da]	DeltaM [ppm]	Deltam/z [Da]	Activation Type	MS Order	Isolation Interference [%]	Average Reporter S/N	Ion Inject Time [ms]	RT [min]	First Scan	Spectrum File	Abundance: 113	Abundance: 114	Abundance: 115	Abundance: 116	Abundance: 117	Abundance: 118	Abundance: 119	XCorr	Percolator q-Value	Percolator PEP
	Low	Unambiguous	[R].IAKNKDR.[E]		1	1	c59436_g2	c59436_g2	2	2	0.0779	0	1	422.754	844.5	844.5	0	0	HCD (High Energy Collision Dissociation)	MS2	0	34.6	50	21.6132	5016	SHUTSA.raw	56.4	33.8	47.6	28.4	31.9	42	36.4	0.77	0.5954	0.9584
High	c74077_g1	0.929	0.016	1	1	1	1	1	976	111.4	6.95	0	1														Low	Low	Low	Low	Low	Low	Low
Checked	Annotated Sequence	Modifications in Master Proteins	Qvality PEP	Qvality q-value	# Protein Groups	# Proteins	# PSMs	Master Protein Accessions	Positions in Master Proteins	# Missed Cleavages	Theo. MH+ [Da]	# Razor Quan Results	Abundance Ratio: (114) / (113)	Abundance Ratio: (116) / (113)	Abundance Ratio: (117) / (113)	Abundance Ratio: (118) / (113)	Abundance Ratio: (119) / (113)	Abundances (Grouped): 113	Abundances (Grouped): 114	Abundances (Grouped): 115	Abundances (Grouped): 116	Abundances (Grouped): 117	Abundances (Grouped): 118	Abundances (Grouped): 119	Abundances (Grouped): 121	Quan Info	Found in Sample: [S98] F12: 114, Sample	Found in Sample: [S99] F12: 115, Sample	Found in Sample: [S100] F12: 116, Sample	Found in Sample: [S101] F12: 117, Sample	Found in Sample: [S102] F12: 118, Sample	Found in Sample: [S103] F12: 119, Sample	Found in Sample: [S104] F12: 121, Sample	Percolator PEP (by Search Engine): Sequest HT	XCorr (by Search Engine): Sequest HT	Sequence in Protein	Positions in Protein	Peptide Group Modifications in Protein	Quan Usage
FALSE	[K].IPGIFGR.[L]		1	0.800029	1	1	1	c74077_g1	c74077_g1 [541-547]	0	759.451	0														No Quan Labels	Low	Low	Low	Low	Low	Low	Not Found	0.9642	0.56	K.IPGIFGR.L	[541-547]		Not Used
	Confidence	PSM Ambiguity	Annotated Sequence	Modifications	# Protein Groups	# Proteins	Master Protein Accessions	Protein Accessions	# Missed Cleavages	Charge	DeltaScore	DeltaCn	Rank	m/z [Da]	MH+ [Da]	Theo. MH+ [Da]	DeltaM [ppm]	Deltam/z [Da]	Activation Type	MS Order	Isolation Interference [%]	Average Reporter S/N	Ion Inject Time [ms]	RT [min]	First Scan	Spectrum File	Abundance: 113	Abundance: 114	Abundance: 115	Abundance: 116	Abundance: 117	Abundance: 118	Abundance: 119	XCorr	Percolator q-Value	Percolator PEP
	Low	Unambiguous	[K].IPGIFGR.[L]		1	1	c74077_g1	c74077_g1	0	2	1	0	1	380.232	759.456	759.451	6.23	0.00237	HCD (High Energy Collision Dissociation)	MS2	28.9825	73.1	50	18.6392	4123	SHUTSA.raw	70.7	92	68.6	73.5	64.6	86.6	128.7	0.56	0.5954	0.9642
High	c18669_g1	0.867	0.012	3	1	2	1	1	430	48.6	7.5	0	1														Low	Low	Low	Low	Low	Low	Low
Checked	Annotated Sequence	Modifications in Master Proteins	Qvality PEP	Qvality q-value	# Protein Groups	# Proteins	# PSMs	Master Protein Accessions	Positions in Master Proteins	# Missed Cleavages	Theo. MH+ [Da]	# Razor Quan Results	Abundance Ratio: (114) / (113)	Abundance Ratio: (116) / (113)	Abundance Ratio: (117) / (113)	Abundance Ratio: (118) / (113)	Abundance Ratio: (119) / (113)	Abundances (Grouped): 113	Abundances (Grouped): 114	Abundances (Grouped): 115	Abundances (Grouped): 116	Abundances (Grouped): 117	Abundances (Grouped): 118	Abundances (Grouped): 119	Abundances (Grouped): 121	Quan Info	Found in Sample: [S98] F12: 114, Sample	Found in Sample: [S99] F12: 115, Sample	Found in Sample: [S100] F12: 116, Sample	Found in Sample: [S101] F12: 117, Sample	Found in Sample: [S102] F12: 118, Sample	Found in Sample: [S103] F12: 119, Sample	Found in Sample: [S104] F12: 121, Sample	Percolator PEP (by Search Engine): Sequest HT	XCorr (by Search Engine): Sequest HT	Sequence in Protein	Positions in Protein	Peptide Group Modifications in Protein	Quan Usage
FALSE	[K].LAKERPAKYQGK.[D]		1	0.800029	1	1	2	c18669_g1	c18669_g1 [269-280]	2	1388.8	0														No Quan Labels	Low	Low	Low	Low	Low	Low	Not Found	1	0.82	K.LAKERPAKYQGK.D	[269-280]		Not Used
	Confidence	PSM Ambiguity	Annotated Sequence	Modifications	# Protein Groups	# Proteins	Master Protein Accessions	Protein Accessions	# Missed Cleavages	Charge	DeltaScore	DeltaCn	Rank	m/z [Da]	MH+ [Da]	Theo. MH+ [Da]	DeltaM [ppm]	Deltam/z [Da]	Activation Type	MS Order	Isolation Interference [%]	Average Reporter S/N	Ion Inject Time [ms]	RT [min]	First Scan	Spectrum File	Abundance: 113	Abundance: 114	Abundance: 115	Abundance: 116	Abundance: 117	Abundance: 118	Abundance: 119	XCorr	Percolator q-Value	Percolator PEP
	Low	Unambiguous	[K].LAKERPAKYQGK.[D]		1	1	c18669_g1	c18669_g1	2	2	0.2174	0	1	694.909	1388.81	1388.8	6.48	0.0045	HCD (High Energy Collision Dissociation)	MS2	9.07598	27.2	42.688	35.0095	8899	SHUTSA.raw	20.1	13	151	13.1	5.4	9.7	5.4	0.69	0.5954	0.9728
	Low	Unambiguous	[K].LAKERPAKYQGK.[D]		1	1	c18669_g1	c18669_g1	2	2	0.1341	0	1	694.91	1388.81	1388.8	8.94	0.00621	HCD (High Energy Collision Dissociation)	MS2	0	5.6	50	35.1817	8950	SHUTSA.raw	12.1	5.8	13.7	3.3		5.9	3.9	0.82	0.8974	1
High	c24239_g1	1	0	8	1	1	1	1	79	8.7	8.02	0	1														Low	Low	Low	Low	Low	Low	Low
Checked	Annotated Sequence	Modifications in Master Proteins	Qvality PEP	Qvality q-value	# Protein Groups	# Proteins	# PSMs	Master Protein Accessions	Positions in Master Proteins	# Missed Cleavages	Theo. MH+ [Da]	# Razor Quan Results	Abundance Ratio: (114) / (113)	Abundance Ratio: (116) / (113)	Abundance Ratio: (117) / (113)	Abundance Ratio: (118) / (113)	Abundance Ratio: (119) / (113)	Abundances (Grouped): 113	Abundances (Grouped): 114	Abundances (Grouped): 115	Abundances (Grouped): 116	Abundances (Grouped): 117	Abundances (Grouped): 118	Abundances (Grouped): 119	Abundances (Grouped): 121	Quan Info	Found in Sample: [S98] F12: 114, Sample	Found in Sample: [S99] F12: 115, Sample	Found in Sample: [S100] F12: 116, Sample	Found in Sample: [S101] F12: 117, Sample	Found in Sample: [S102] F12: 118, Sample	Found in Sample: [S103] F12: 119, Sample	Found in Sample: [S104] F12: 121, Sample	Percolator PEP (by Search Engine): Sequest HT	XCorr (by Search Engine): Sequest HT	Sequence in Protein	Positions in Protein	Peptide Group Modifications in Protein	Quan Usage
FALSE	[R].LRVVRP.[-]		1	0.844476	1	1	1	c24239_g1	c24239_g1 [74-79]	1	739.494	0														No Quan Labels	Low	Low	Low	Low	Low	Low	Not Found	0.9998	0.86	R.LRVVRP.-	[74-79]		Not Used
	Confidence	PSM Ambiguity	Annotated Sequence	Modifications	# Protein Groups	# Proteins	Master Protein Accessions	Protein Accessions	# Missed Cleavages	Charge	DeltaScore	DeltaCn	Rank	m/z [Da]	MH+ [Da]	Theo. MH+ [Da]	DeltaM [ppm]	Deltam/z [Da]	Activation Type	MS Order	Isolation Interference [%]	Average Reporter S/N	Ion Inject Time [ms]	RT [min]	First Scan	Spectrum File	Abundance: 113	Abundance: 114	Abundance: 115	Abundance: 116	Abundance: 117	Abundance: 118	Abundance: 119	XCorr	Percolator q-Value	Percolator PEP
	Low	Unambiguous	[R].LRVVRP.[-]		1	1	c24239_g1	c24239_g1	1	2	0.3023	0	1	370.25	739.493	739.494	-1.35	-0.0005	HCD (High Energy Collision Dissociation)	MS2	51.5395	15.7	50	18.1772	4007	SHUTSA.raw	28.2	20.3	19.6	13.3	12.5	14.5	17.5	0.86	0.6159	0.9998
High	c41573_g1	0.286	0	1	1	26	1	1	537	61.1	5.99	0	1	0.71	1.311	0.44	0.295	0.449	0.361	175.2	124.5	229.7	77.1	51.7	78.7	63.2	Low	Low	Low	Low	Low	Low	Low
Checked	Annotated Sequence	Modifications in Master Proteins	Qvality PEP	Qvality q-value	# Protein Groups	# Proteins	# PSMs	Master Protein Accessions	Positions in Master Proteins	# Missed Cleavages	Theo. MH+ [Da]	# Razor Quan Results	Abundance Ratio: (114) / (113)	Abundance Ratio: (116) / (113)	Abundance Ratio: (117) / (113)	Abundance Ratio: (118) / (113)	Abundance Ratio: (119) / (113)	Abundances (Grouped): 113	Abundances (Grouped): 114	Abundances (Grouped): 115	Abundances (Grouped): 116	Abundances (Grouped): 117	Abundances (Grouped): 118	Abundances (Grouped): 119	Abundances (Grouped): 121	Quan Info	Found in Sample: [S98] F12: 114, Sample	Found in Sample: [S99] F12: 115, Sample	Found in Sample: [S100] F12: 116, Sample	Found in Sample: [S101] F12: 117, Sample	Found in Sample: [S102] F12: 118, Sample	Found in Sample: [S103] F12: 119, Sample	Found in Sample: [S104] F12: 121, Sample	Percolator PEP (by Search Engine): Sequest HT	XCorr (by Search Engine): Sequest HT	Sequence in Protein	Positions in Protein	Peptide Group Modifications in Protein	Quan Usage
FALSE	[R].LPPQEFAK.[D]		1	0.844476	1	1	26	c41573_g1	c41573_g1 [456-463]	0	1233.71	1	0.71	0.44	0.295	0.449	0.361	175.2	124.5	229.7	77.1	51.7	78.7	63.2			Low	Low	Low	Low	Low	Low	Not Found	1	0.64	R.LPPQEFAK.D	[456-463]		Used
	Confidence	PSM Ambiguity	Annotated Sequence	Modifications	# Protein Groups	# Proteins	Master Protein Accessions	Protein Accessions	# Missed Cleavages	Charge	DeltaScore	DeltaCn	Rank	m/z [Da]	MH+ [Da]	Theo. MH+ [Da]	DeltaM [ppm]	Deltam/z [Da]	Activation Type	MS Order	Isolation Interference [%]	Average Reporter S/N	Ion Inject Time [ms]	RT [min]	First Scan	Spectrum File	Abundance: 113	Abundance: 114	Abundance: 115	Abundance: 116	Abundance: 117	Abundance: 118	Abundance: 119	XCorr	Percolator q-Value	Percolator PEP
	Low	Unambiguous	[R].LPPQEFAk.[D]	K8(iTRAQ8plex)	1	1	c41573_g1	c41573_g1	0	2	0.0513	0	1	617.357	1233.71	1233.71	-6.08	-0.00375	HCD (High Energy Collision Dissociation)	MS2	16.9501	8.4	50	29.7943	7477	SHUTSA.raw	15.8	11.4	17.7	5.7	3.8	6.6	6.4	0.39	0.8974	1
	Low	Rejected	[R].LPPQEFAk.[D]	K8(iTRAQ8plex)	1	1	c41573_g1	c41573_g1	0	2		0	2	617.359	1233.71	1233.71	-2.81	-0.00173	HCD (High Energy Collision Dissociation)	MS2	0	4.2	50	57.9074	14614	SHUTSA.raw	9.9	7.2	8.4	2.7		5.2		0.39	0.8974	1
	Low	Unambiguous	[R].LPPQEFAk.[D]	K8(iTRAQ8plex)	1	1	c41573_g1	c41573_g1	0	2	0.3265	0	1	617.358	1233.71	1233.71	-5.19	-0.0032	HCD (High Energy Collision Dissociation)	MS2	0	4.2	48.769	57.6128	14544	SHUTSA.raw	7.5	8.2	7.8	2.3		4.9	2.6	0.49	0.8974	1
	Low	Selected	[R].LPPQEFAk.[D]	K8(iTRAQ8plex)	1	1	c41573_g1	c41573_g1	0	2	0.0351	0	1	617.359	1233.71	1233.71	-3.8	-0.00234	HCD (High Energy Collision Dissociation)	MS2	0	5.2	48.974	56.5557	14288	SHUTSA.raw	15	6.9	7.9	3.3		6.3	2	0.57	0.8974	1
	Low	Rejected	[R].LPPQEFAk.[D]	K8(iTRAQ8plex)	1	1	c41573_g1	c41573_g1	0	2		0	2	617.359	1233.71	1233.71	-3.6	-0.00222	HCD (High Energy Collision Dissociation)	MS2	8.36702	2.4	31.091	57.4329	14497	SHUTSA.raw	7.8	3.8	5.3			2.5		0.52	0.8974	1
	Low	Unambiguous	[R].LPPQEFAk.[D]	K8(iTRAQ8plex)	1	1	c41573_g1	c41573_g1	0	2	0.0784	0	1	617.357	1233.71	1233.71	-6.67	-0.00411	HCD (High Energy Collision Dissociation)	MS2	27.7731	3.6	50	57.2169	14444	SHUTSA.raw	6	6.6	6.3		2.4	4.5	2.8	0.51	0.8974	1
	Low	Rejected	[R].LPPQEFAk.[D]	K8(iTRAQ8plex)	1	1	c41573_g1	c41573_g1	0	2		0	2	617.358	1233.71	1233.71	-3.9	-0.00241	HCD (High Energy Collision Dissociation)	MS2	8.53387	2.2	45.084	47.3549	12051	SHUTSA.raw	10.2	3.2	4.1					0.35	0.8974	1
	Low	Unambiguous	[R].LPPQEFAk.[D]	K8(iTRAQ8plex)	1	1	c41573_g1	c41573_g1	0	2	0.2973	0	1	617.358	1233.71	1233.71	-5.19	-0.0032	HCD (High Energy Collision Dissociation)	MS2	0	1.5	38.04	42.3918	10841	SHUTSA.raw	5.4	2.7	3.8					0.37	0.8974	1
	Low	Selected	[R].LPPQEFAk.[D]	K8(iTRAQ8plex)	1	1	c41573_g1	c41573_g1	0	2	0	0	1	617.359	1233.71	1233.71	-3.21	-0.00198	HCD (High Energy Collision Dissociation)	MS2	60.5373	2.1	50	44.0554	11259	SHUTSA.raw	6.3		4.8		2.5	3.2		0.64	0.8974	1
	Low	Selected	[R].LPPQEFAk.[D]	K8(iTRAQ8plex)	1	1	c41573_g1	c41573_g1	0	2	0	0	1	617.359	1233.71	1233.71	-3.7	-0.00228	HCD (High Energy Collision Dissociation)	MS2	16.7725	1	24.94	52.039	13233	SHUTSA.raw	4.8		2.8					0.35	0.8974	1
	Low	Selected	[R].LPPQEFAk.[D]	K8(iTRAQ8plex)	1	1	c41573_g1	c41573_g1	0	2	0.0238	0	1	617.36	1233.71	1233.71	-2.22	-0.00137	HCD (High Energy Collision Dissociation)	MS2	19.9462	4.9	50	49.9907	12737	SHUTSA.raw	14.4	3.4	9.9	3.4		3.9	4.1	0.42	0.8974	1
	Low	Unambiguous	[R].LPPQEFAk.[D]	K8(iTRAQ8plex)	1	1	c41573_g1	c41573_g1	0	2	0.1163	0	1	617.357	1233.71	1233.71	-6.08	-0.00375	HCD (High Energy Collision Dissociation)	MS2	0	4.5	50	62.2676	15645	SHUTSA.raw	14.1	2.8	10.6	3.7		4.6		0.43	0.8974	1
	Low	Rejected	[R].LPPQEFAk.[D]	K8(iTRAQ8plex)	1	1	c41573_g1	c41573_g1	0	2		0	2	617.357	1233.71	1233.71	-6.47	-0.00399	HCD (High Energy Collision Dissociation)	MS2		6.9	50	60.1049	15133	SHUTSA.raw	14	9	13.5	3.3	3.4	7.5	4.6	0.39	0.8974	1
	Low	Selected	[R].LPPQEFAk.[D]	K8(iTRAQ8plex)	1	1	c41573_g1	c41573_g1	0	2	0	0	1	617.359	1233.71	1233.71	-3.51	-0.00217	HCD (High Energy Collision Dissociation)	MS2		2.4	50	46.5559	11855	SHUTSA.raw	5.8	2.9	7.5			2.9		0.36	0.9039	1
	Low	Selected	[R].LPPQEFAk.[D]	K8(iTRAQ8plex)	1	1	c41573_g1	c41573_g1	0	2	0	0	1	617.358	1233.71	1233.71	-4.2	-0.00259	HCD (High Energy Collision Dissociation)	MS2	0	0.6	24.937	50.7839	12930	SHUTSA.raw	2.4	2.2						0.36	0.9039	1
	Low	Rejected	[R].LPPQEFAk.[D]	K8(iTRAQ8plex)	1	1	c41573_g1	c41573_g1	0	2		0	2	617.359	1233.71	1233.71	-2.32	-0.00143	HCD (High Energy Collision Dissociation)	MS2	0	0.9	16.197	56.0194	14158	SHUTSA.raw	4.4	2.7						0.4	0.9039	1
	Low	Selected	[R].LPPQEFAk.[D]	K8(iTRAQ8plex)	1	1	c41573_g1	c41573_g1	0	2	0	0	1	617.359	1233.71	1233.71	-3.7	-0.00228	HCD (High Energy Collision Dissociation)	MS2	0	0.6	29.054	47.1227	11993	SHUTSA.raw	4.4							0.39	0.9096	1
	Low	Rejected	[R].LPPQEFAk.[D]	K8(iTRAQ8plex)	1	1	c41573_g1	c41573_g1	0	2		0	2	617.359	1233.71	1233.71	-3.11	-0.00192	HCD (High Energy Collision Dissociation)	MS2	0	1.9	25.227	52.5479	13352	SHUTSA.raw	6.9	2.3	3.4			2.3		0.48	0.9101	1
	Low	Selected	[R].LPPQEFAk.[D]	K8(iTRAQ8plex)	1	1	c41573_g1	c41573_g1	0	2	0.0227	0	1	617.357	1233.71	1233.71	-5.48	-0.00338	HCD (High Energy Collision Dissociation)	MS2	0	2.4	17.391	49.6872	12662	SHUTSA.raw	5.4	6.2	5.2			2.1		0.44	0.9272	1
	Low	Rejected	[R].LPPQEFAk.[D]	K8(iTRAQ8plex)	1	1	c41573_g1	c41573_g1	0	2		0.0488	3	617.36	1233.71	1233.71	-1.92	-0.00119	HCD (High Energy Collision Dissociation)	MS2	0	9.6	50	67.0677	16708	SHUTSA.raw	15.6	10.7	12.4	11.8	11	9.5	5.4	0.39	0.9301	1
	Low	Selected	[R].LPPQEFAk.[D]	K8(iTRAQ8plex)	1	1	c41573_g1	c41573_g1	0	2	0	0	1	617.358	1233.71	1233.71	-4.2	-0.00259	HCD (High Energy Collision Dissociation)	MS2	0	2.7	50	51.3437	13066	SHUTSA.raw	6.2	2.5	6.7	3.5		2.9		0.35	0.9301	1
	Low	Unambiguous	[R].LPPQEFAk.[D]	K8(iTRAQ8plex)	1	1	c41573_g1	c41573_g1	0	2	0.125	0	1	617.357	1233.71	1233.71	-6.87	-0.00424	HCD (High Energy Collision Dissociation)	MS2	25.3828	3.5	50	40.0028	10231	SHUTSA.raw	8.4		7.7	2.6	3.5	3.7	1.9	0.4	0.9301	1
	Low	Selected	[R].LPPQEFAk.[D]	K8(iTRAQ8plex)	1	1	c41573_g1	c41573_g1	0	2	0	0	1	617.36	1233.71	1233.71	-1.72	-0.00106	HCD (High Energy Collision Dissociation)	MS2	0	2	50	45.2609	11553	SHUTSA.raw	10.6		5					0.55	0.9314	1
	Low	Rejected	[R].LPPQEFAk.[D]	K8(iTRAQ8plex)	1	1	c41573_g1	c41573_g1	0	2		0	2	617.36	1233.71	1233.71	-2.22	-0.00137	HCD (High Energy Collision Dissociation)	MS2	0	1.7	21.886	61.2357	15398	SHUTSA.raw	8	2.3	3.1					0.4	0.9389	1
	Low	Rejected	[R].LPPQEFAk.[D]	K8(iTRAQ8plex)	1	1	c41573_g1	c41573_g1	0	2		0.0244	3	617.358	1233.71	1233.71	-4.2	-0.00259	HCD (High Energy Collision Dissociation)	MS2	59.8909	4.2	50	70.3209	17674	SHUTSA.raw	8.7	5.9	5.3	2.9	5.5	2	3.5	0.4	0.9389	1
	Low	Selected	[R].LPPQEFAk.[D]	K8(iTRAQ8plex)	1	1	c41573_g1	c41573_g1	0	2	0	0	1	617.358	1233.71	1233.71	-3.9	-0.00241	HCD (High Energy Collision Dissociation)	MS2		13	50	29.1677	7314	SHUTSA.raw	24	15.2	35.3	7.9	5.1	9.2	7.6	0.42	0.9525	1
High	c74028_g2	0.364	0	9	1	3	1	1	116	13	9.92	0	1														Low	Low	Low	Low	Low	Low	Low
Checked	Annotated Sequence	Modifications in Master Proteins	Qvality PEP	Qvality q-value	# Protein Groups	# Proteins	# PSMs	Master Protein Accessions	Positions in Master Proteins	# Missed Cleavages	Theo. MH+ [Da]	# Razor Quan Results	Abundance Ratio: (114) / (113)	Abundance Ratio: (116) / (113)	Abundance Ratio: (117) / (113)	Abundance Ratio: (118) / (113)	Abundance Ratio: (119) / (113)	Abundances (Grouped): 113	Abundances (Grouped): 114	Abundances (Grouped): 115	Abundances (Grouped): 116	Abundances (Grouped): 117	Abundances (Grouped): 118	Abundances (Grouped): 119	Abundances (Grouped): 121	Quan Info	Found in Sample: [S98] F12: 114, Sample	Found in Sample: [S99] F12: 115, Sample	Found in Sample: [S100] F12: 116, Sample	Found in Sample: [S101] F12: 117, Sample	Found in Sample: [S102] F12: 118, Sample	Found in Sample: [S103] F12: 119, Sample	Found in Sample: [S104] F12: 121, Sample	Percolator PEP (by Search Engine): Sequest HT	XCorr (by Search Engine): Sequest HT	Sequence in Protein	Positions in Protein	Peptide Group Modifications in Protein	Quan Usage
FALSE	[-].LPVIGLEKSCR.[Y]		1	0.926357	1	1	3	c74028_g2	c74028_g2 [1-11]	1	1271.71	0														No Quan Labels	Low	Low	Low	Low	Low	Low	Not Found	1	0.5	-.LPVIGLEKSCR.Y	[1-11]		Not Used
	Confidence	PSM Ambiguity	Annotated Sequence	Modifications	# Protein Groups	# Proteins	Master Protein Accessions	Protein Accessions	# Missed Cleavages	Charge	DeltaScore	DeltaCn	Rank	m/z [Da]	MH+ [Da]	Theo. MH+ [Da]	DeltaM [ppm]	Deltam/z [Da]	Activation Type	MS Order	Isolation Interference [%]	Average Reporter S/N	Ion Inject Time [ms]	RT [min]	First Scan	Spectrum File	Abundance: 113	Abundance: 114	Abundance: 115	Abundance: 116	Abundance: 117	Abundance: 118	Abundance: 119	XCorr	Percolator q-Value	Percolator PEP
	Low	Selected	[-].LPVIGLEKScR.[Y]	C10(Carbamidomethyl)	1	1	c74028_g2	c74028_g2	1	2	0.02	0	1	636.364	1271.72	1271.71	5.58	0.00355	HCD (High Energy Collision Dissociation)	MS2		3.4	50	68.1582	17029	SHUTSA.raw	5.1	3.8	5	5.2		5.7	2.6	0.5	0.9301	1
	Low	Rejected	[-].LPVIGLEKScR.[Y]	C10(Carbamidomethyl)	1	1	c74028_g2	c74028_g2	1	2		0.0217	3	636.362	1271.72	1271.71	2.8	0.00178	HCD (High Energy Collision Dissociation)	MS2	15.6928	3.6	50	72.3983	18320	SHUTSA.raw	3.6	3.7	4.8	4	4	4.8	4.1	0.45	0.9389	1
	Low	Rejected	[-].LPVIGLEKScR.[Y]	C10(Carbamidomethyl)	1	1	c74028_g2	c74028_g2	1	2		0	3	636.361	1271.72	1271.71	0.78	0.0005	HCD (High Energy Collision Dissociation)	MS2		20.1	50	67.7915	16921	SHUTSA.raw	23.5	25.6	29.3	19.6	16.8	21.7	24.5	0.48	0.9423	1
High	c54002_g1	0.176	0	2	1	36	1	1	518	59.1	7.03	0	1														Low	Low	Low	Low	Low	Low	Low
Checked	Annotated Sequence	Modifications in Master Proteins	Qvality PEP	Qvality q-value	# Protein Groups	# Proteins	# PSMs	Master Protein Accessions	Positions in Master Proteins	# Missed Cleavages	Theo. MH+ [Da]	# Razor Quan Results	Abundance Ratio: (114) / (113)	Abundance Ratio: (116) / (113)	Abundance Ratio: (117) / (113)	Abundance Ratio: (118) / (113)	Abundance Ratio: (119) / (113)	Abundances (Grouped): 113	Abundances (Grouped): 114	Abundances (Grouped): 115	Abundances (Grouped): 116	Abundances (Grouped): 117	Abundances (Grouped): 118	Abundances (Grouped): 119	Abundances (Grouped): 121	Quan Info	Found in Sample: [S98] F12: 114, Sample	Found in Sample: [S99] F12: 115, Sample	Found in Sample: [S100] F12: 116, Sample	Found in Sample: [S101] F12: 117, Sample	Found in Sample: [S102] F12: 118, Sample	Found in Sample: [S103] F12: 119, Sample	Found in Sample: [S104] F12: 121, Sample	Percolator PEP (by Search Engine): Sequest HT	XCorr (by Search Engine): Sequest HT	Sequence in Protein	Positions in Protein	Peptide Group Modifications in Protein	Quan Usage
FALSE	[R].LPPEKMAK.[V]		1	0.844476	1	1	36	c54002_g1	c54002_g1 [194-201]	1	1233.72	0														No Quan Values	Low	Low	Low	Low	Low	Low	Not Found	1	0.64	R.LPPEKMAK.V	[194-201]		Not Used
	Confidence	PSM Ambiguity	Annotated Sequence	Modifications	# Protein Groups	# Proteins	Master Protein Accessions	Protein Accessions	# Missed Cleavages	Charge	DeltaScore	DeltaCn	Rank	m/z [Da]	MH+ [Da]	Theo. MH+ [Da]	DeltaM [ppm]	Deltam/z [Da]	Activation Type	MS Order	Isolation Interference [%]	Average Reporter S/N	Ion Inject Time [ms]	RT [min]	First Scan	Spectrum File	Abundance: 113	Abundance: 114	Abundance: 115	Abundance: 116	Abundance: 117	Abundance: 118	Abundance: 119	XCorr	Percolator q-Value	Percolator PEP
	Low	Rejected	[R].LPPEkmAK.[V]	K5(iTRAQ8plex); M6(Oxidation)	1	1	c54002_g1	c54002_g1	1	2		0	3	617.359	1233.71	1233.72	-5.54	-0.00342	HCD (High Energy Collision Dissociation)	MS2	0	4.2	50	57.9074	14614	SHUTSA.raw	9.9	7.2	8.4	2.7		5.2		0.39	0.8974	1
	Low	Selected	[R].LPPEKmAk.[V]	M6(Oxidation); K8(iTRAQ8plex)	1	1	c54002_g1	c54002_g1	1	2	0	0	1	617.359	1233.71	1233.72	-5.54	-0.00342	HCD (High Energy Collision Dissociation)	MS2	0	4.2	50	57.9074	14614	SHUTSA.raw	9.9	7.2	8.4	2.7		5.2		0.39	0.8974	1
	Low	Unambiguous	[R].LPPEkmAK.[V]	K5(iTRAQ8plex); M6(Oxidation)	1	1	c54002_g1	c54002_g1	1	2		0.0213	2	617.359	1233.71	1233.72	-6.34	-0.00391	HCD (High Energy Collision Dissociation)	MS2	16.4392	5.1	50	58.5489	14762	SHUTSA.raw	8.5	5.1	9.3	4.3	2.2	7.4	4	0.46	0.8974	1
	Low	Unambiguous	[R].LPPEKmAk.[V]	M6(Oxidation); K8(iTRAQ8plex)	1	1	c54002_g1	c54002_g1	1	2	0.0213	0	1	617.359	1233.71	1233.72	-6.34	-0.00391	HCD (High Energy Collision Dissociation)	MS2	16.4392	5.1	50	58.5489	14762	SHUTSA.raw	8.5	5.1	9.3	4.3	2.2	7.4	4	0.47	0.8974	1
	Low	Rejected	[R].LPPEKmAk.[V]	M6(Oxidation); K8(iTRAQ8plex)	1	1	c54002_g1	c54002_g1	1	2		0.0351	2	617.359	1233.71	1233.72	-6.53	-0.00403	HCD (High Energy Collision Dissociation)	MS2	0	5.2	48.974	56.5557	14288	SHUTSA.raw	15	6.9	7.9	3.3		6.3	2	0.55	0.8974	1
	Low	Rejected	[R].LPPEkmAK.[V]	K5(iTRAQ8plex); M6(Oxidation)	1	1	c54002_g1	c54002_g1	1	2		0.0192	3	617.359	1233.71	1233.72	-6.34	-0.00391	HCD (High Energy Collision Dissociation)	MS2	8.36702	2.4	31.091	57.4329	14497	SHUTSA.raw	7.8	3.8	5.3			2.5		0.51	0.8974	1
	Low	Selected	[R].LPPEKmAk.[V]	M6(Oxidation); K8(iTRAQ8plex)	1	1	c54002_g1	c54002_g1	1	2	0	0	1	617.359	1233.71	1233.72	-6.34	-0.00391	HCD (High Energy Collision Dissociation)	MS2	8.36702	2.4	31.091	57.4329	14497	SHUTSA.raw	7.8	3.8	5.3			2.5		0.52	0.8974	1
	Low	Rejected	[R].LPPEkmAK.[V]	K5(iTRAQ8plex); M6(Oxidation)	1	1	c54002_g1	c54002_g1	1	2		0.0286	3	617.358	1233.71	1233.72	-6.63	-0.00409	HCD (High Energy Collision Dissociation)	MS2	8.53387	2.2	45.084	47.3549	12051	SHUTSA.raw	10.2	3.2	4.1					0.34	0.8974	1
	Low	Selected	[R].LPPEKmAk.[V]	M6(Oxidation); K8(iTRAQ8plex)	1	1	c54002_g1	c54002_g1	1	2	0	0	1	617.358	1233.71	1233.72	-6.63	-0.00409	HCD (High Energy Collision Dissociation)	MS2	8.53387	2.2	45.084	47.3549	12051	SHUTSA.raw	10.2	3.2	4.1					0.35	0.8974	1
	Low	Rejected	[R].LPPEKmAk.[V]	M6(Oxidation); K8(iTRAQ8plex)	1	1	c54002_g1	c54002_g1	1	2		0	2	617.359	1233.71	1233.72	-5.94	-0.00366	HCD (High Energy Collision Dissociation)	MS2	60.5373	2.1	50	44.0554	11259	SHUTSA.raw	6.3		4.8		2.5	3.2		0.64	0.8974	1
	Low	Rejected	[R].LPPEkmAK.[V]	K5(iTRAQ8plex); M6(Oxidation)	1	1	c54002_g1	c54002_g1	1	2		0	2	617.359	1233.71	1233.72	-5.94	-0.00366	HCD (High Energy Collision Dissociation)	MS2	60.5373	2.1	50	44.0554	11259	SHUTSA.raw	6.3		4.8		2.5	3.2		0.64	0.8974	1
	Low	Rejected	[R].LPPEkmAK.[V]	K5(iTRAQ8plex); M6(Oxidation)	1	1	c54002_g1	c54002_g1	1	2		0.0238	2	617.36	1233.71	1233.72	-4.95	-0.00305	HCD (High Energy Collision Dissociation)	MS2	19.9462	4.9	50	49.9907	12737	SHUTSA.raw	14.4	3.4	9.9	3.4		3.9	4.1	0.41	0.8974	1
	Low	Rejected	[R].LPPEkmAK.[V]	K5(iTRAQ8plex); M6(Oxidation)	1	1	c54002_g1	c54002_g1	1	2		0	2	617.359	1233.71	1233.72	-6.43	-0.00397	HCD (High Energy Collision Dissociation)	MS2	16.7725	1	24.94	52.039	13233	SHUTSA.raw	4.8		2.8					0.35	0.9015	1
	Low	Rejected	[R].LPPEKmAk.[V]	M6(Oxidation); K8(iTRAQ8plex)	1	1	c54002_g1	c54002_g1	1	2		0	2	617.359	1233.71	1233.72	-6.43	-0.00397	HCD (High Energy Collision Dissociation)	MS2	16.7725	1	24.94	52.039	13233	SHUTSA.raw	4.8		2.8					0.35	0.9015	1
	Low	Rejected	[R].LPPEkmAK.[V]	K5(iTRAQ8plex); M6(Oxidation)	1	1	c54002_g1	c54002_g1	1	2		0	2	617.359	1233.71	1233.72	-6.24	-0.00385	HCD (High Energy Collision Dissociation)	MS2		2.4	50	46.5559	11855	SHUTSA.raw	5.8	2.9	7.5			2.9		0.36	0.9039	1
	Low	Rejected	[R].LPPEKmAk.[V]	M6(Oxidation); K8(iTRAQ8plex)	1	1	c54002_g1	c54002_g1	1	2		0	2	617.359	1233.71	1233.72	-6.24	-0.00385	HCD (High Energy Collision Dissociation)	MS2		2.4	50	46.5559	11855	SHUTSA.raw	5.8	2.9	7.5			2.9		0.36	0.9039	1
	Low	Rejected	[R].LPPEkmAK.[V]	K5(iTRAQ8plex); M6(Oxidation)	1	1	c54002_g1	c54002_g1	1	2		0	4	617.358	1233.71	1233.72	-6.93	-0.00427	HCD (High Energy Collision Dissociation)	MS2	0	0.6	24.937	50.7839	12930	SHUTSA.raw	2.4	2.2						0.36	0.9039	1
	Low	Rejected	[R].LPPEKmAk.[V]	M6(Oxidation); K8(iTRAQ8plex)	1	1	c54002_g1	c54002_g1	1	2		0	2	617.358	1233.71	1233.72	-6.93	-0.00427	HCD (High Energy Collision Dissociation)	MS2	0	0.6	24.937	50.7839	12930	SHUTSA.raw	2.4	2.2						0.36	0.9039	1
	Low	Rejected	[R].LPPEkmAK.[V]	K5(iTRAQ8plex); M6(Oxidation)	1	1	c54002_g1	c54002_g1	1	2		0.025	3	617.359	1233.71	1233.72	-5.05	-0.00311	HCD (High Energy Collision Dissociation)	MS2	0	0.9	16.197	56.0194	14158	SHUTSA.raw	4.4	2.7						0.39	0.9096	1
	Low	Selected	[R].LPPEKmAk.[V]	M6(Oxidation); K8(iTRAQ8plex)	1	1	c54002_g1	c54002_g1	1	2	0	0	1	617.359	1233.71	1233.72	-5.05	-0.00311	HCD (High Energy Collision Dissociation)	MS2	0	0.9	16.197	56.0194	14158	SHUTSA.raw	4.4	2.7						0.4	0.9096	1
	Low	Rejected	[R].LPPEkmAK.[V]	K5(iTRAQ8plex); M6(Oxidation)	1	1	c54002_g1	c54002_g1	1	2		0	2	617.359	1233.71	1233.72	-6.43	-0.00397	HCD (High Energy Collision Dissociation)	MS2	0	0.6	29.054	47.1227	11993	SHUTSA.raw	4.4							0.39	0.9101	1
	Low	Unambiguous	[R].LPPEKmAk.[V]	M6(Oxidation); K8(iTRAQ8plex)	1	1	c54002_g1	c54002_g1	1	2	0.1064	0	1	617.359	1233.71	1233.72	-6.53	-0.00403	HCD (High Energy Collision Dissociation)	MS2	0		12.969	48.6365	12393	SHUTSA.raw								0.47	0.9101	1
	Low	Rejected	[R].LPPEKmAk.[V]	M6(Oxidation); K8(iTRAQ8plex)	1	1	c54002_g1	c54002_g1	1	2		0	2	617.359	1233.71	1233.72	-6.43	-0.00397	HCD (High Energy Collision Dissociation)	MS2	0	0.6	29.054	47.1227	11993	SHUTSA.raw	4.4							0.39	0.9101	1
	Low	Rejected	[R].LPPEkmAK.[V]	K5(iTRAQ8plex); M6(Oxidation)	1	1	c54002_g1	c54002_g1	1	2		0	3	617.359	1233.71	1233.72	-5.84	-0.0036	HCD (High Energy Collision Dissociation)	MS2	0	1.9	25.227	52.5479	13352	SHUTSA.raw	6.9	2.3	3.4			2.3		0.48	0.9137	1
	Low	Selected	[R].LPPEKmAk.[V]	M6(Oxidation); K8(iTRAQ8plex)	1	1	c54002_g1	c54002_g1	1	2	0	0	1	617.359	1233.71	1233.72	-5.84	-0.0036	HCD (High Energy Collision Dissociation)	MS2	0	1.9	25.227	52.5479	13352	SHUTSA.raw	6.9	2.3	3.4			2.3		0.48	0.9146	1
	Low	Rejected	[R].LPPEKmAk.[V]	M6(Oxidation); K8(iTRAQ8plex)	1	1	c54002_g1	c54002_g1	1	2		0	2	617.358	1233.71	1233.72	-6.93	-0.00427	HCD (High Energy Collision Dissociation)	MS2	0	2.7	50	51.3437	13066	SHUTSA.raw	6.2	2.5	6.7	3.5		2.9		0.35	0.9291	1
	Low	Rejected	[R].LPPEkmAK.[V]	K5(iTRAQ8plex); M6(Oxidation)	1	1	c54002_g1	c54002_g1	1	2		0	2	617.358	1233.71	1233.72	-6.93	-0.00427	HCD (High Energy Collision Dissociation)	MS2	0	2.7	50	51.3437	13066	SHUTSA.raw	6.2	2.5	6.7	3.5		2.9		0.35	0.9291	1
	Low	Rejected	[R].LPPEKmAk.[V]	M6(Oxidation); K8(iTRAQ8plex)	1	1	c54002_g1	c54002_g1	1	2		0.0488	2	617.36	1233.71	1233.72	-4.65	-0.00287	HCD (High Energy Collision Dissociation)	MS2	0	9.6	50	67.0677	16708	SHUTSA.raw	15.6	10.7	12.4	11.8	11	9.5	5.4	0.39	0.9301	1
	Low	Rejected	[R].LPPEkmAK.[V]	K5(iTRAQ8plex); M6(Oxidation)	1	1	c54002_g1	c54002_g1	1	2		0.0488	4	617.36	1233.71	1233.72	-4.65	-0.00287	HCD (High Energy Collision Dissociation)	MS2	0	9.6	50	67.0677	16708	SHUTSA.raw	15.6	10.7	12.4	11.8	11	9.5	5.4	0.39	0.9301	1
	Low	Rejected	[R].LPPEkmAK.[V]	K5(iTRAQ8plex); M6(Oxidation)	1	1	c54002_g1	c54002_g1	1	2		0	2	617.36	1233.71	1233.72	-4.46	-0.00275	HCD (High Energy Collision Dissociation)	MS2	0	2	50	45.2609	11553	SHUTSA.raw	10.6		5					0.55	0.9301	1
	Low	Rejected	[R].LPPEKmAk.[V]	M6(Oxidation); K8(iTRAQ8plex)	1	1	c54002_g1	c54002_g1	1	2		0	2	617.36	1233.71	1233.72	-4.46	-0.00275	HCD (High Energy Collision Dissociation)	MS2	0	2	50	45.2609	11553	SHUTSA.raw	10.6		5					0.55	0.9301	1
	Low	Rejected	[R].LPPEKmAk.[V]	M6(Oxidation); K8(iTRAQ8plex)	1	1	c54002_g1	c54002_g1	1	2		0	2	617.358	1233.71	1233.72	-6.93	-0.00427	HCD (High Energy Collision Dissociation)	MS2	59.8909	4.2	50	70.3209	17674	SHUTSA.raw	8.7	5.9	5.3	2.9	5.5	2	3.5	0.41	0.9343	1
	Low	Rejected	[R].LPPEkmAK.[V]	K5(iTRAQ8plex); M6(Oxidation)	1	1	c54002_g1	c54002_g1	1	2		0.0244	4	617.358	1233.71	1233.72	-6.93	-0.00427	HCD (High Energy Collision Dissociation)	MS2	59.8909	4.2	50	70.3209	17674	SHUTSA.raw	8.7	5.9	5.3	2.9	5.5	2	3.5	0.4	0.9343	1
	Low	Selected	[R].LPPEKmAk.[V]	M6(Oxidation); K8(iTRAQ8plex)	1	1	c54002_g1	c54002_g1	1	2	0	0	1	617.36	1233.71	1233.72	-4.95	-0.00305	HCD (High Energy Collision Dissociation)	MS2	0	1.7	21.886	61.2357	15398	SHUTSA.raw	8	2.3	3.1					0.4	0.9357	1
	Low	Unambiguous	[R].LPPEkmAK.[V]	K5(iTRAQ8plex); M6(Oxidation)	1	1	c54002_g1	c54002_g1	1	2	0.122	0	1	617.36	1233.71	1233.72	-4.85	-0.00299	HCD (High Energy Collision Dissociation)	MS2	21.9301	2.5	50	51.7938	13176	SHUTSA.raw	8.9		6.3		2.6	2.5		0.41	0.9389	1
	Low	Unambiguous	[R].LPPEKmAk.[V]	M6(Oxidation); K8(iTRAQ8plex)	1	1	c54002_g1	c54002_g1	1	2	0.122	0	1	617.36	1233.71	1233.72	-4.85	-0.00299	HCD (High Energy Collision Dissociation)	MS2	21.9301	2.5	50	51.7938	13176	SHUTSA.raw	8.9		6.3		2.6	2.5		0.41	0.9389	1
High	c144228_g1	0.258	0	2	1	1	1	1	293	33.5	8.19	0	1														Low	Low	Low	Low	Low	Low	Low
Checked	Annotated Sequence	Modifications in Master Proteins	Qvality PEP	Qvality q-value	# Protein Groups	# Proteins	# PSMs	Master Protein Accessions	Positions in Master Proteins	# Missed Cleavages	Theo. MH+ [Da]	# Razor Quan Results	Abundance Ratio: (114) / (113)	Abundance Ratio: (116) / (113)	Abundance Ratio: (117) / (113)	Abundance Ratio: (118) / (113)	Abundance Ratio: (119) / (113)	Abundances (Grouped): 113	Abundances (Grouped): 114	Abundances (Grouped): 115	Abundances (Grouped): 116	Abundances (Grouped): 117	Abundances (Grouped): 118	Abundances (Grouped): 119	Abundances (Grouped): 121	Quan Info	Found in Sample: [S98] F12: 114, Sample	Found in Sample: [S99] F12: 115, Sample	Found in Sample: [S100] F12: 116, Sample	Found in Sample: [S101] F12: 117, Sample	Found in Sample: [S102] F12: 118, Sample	Found in Sample: [S103] F12: 119, Sample	Found in Sample: [S104] F12: 121, Sample	Percolator PEP (by Search Engine): Sequest HT	XCorr (by Search Engine): Sequest HT	Sequence in Protein	Positions in Protein	Peptide Group Modifications in Protein	Quan Usage
FALSE	[K].FLEIMSR.[T]		1	0.921339	1	1	1	c144228_g1	c144228_g1 [129-135]	0	895.471	0														No Quan Labels	Low	Low	Low	Low	Low	Low	Not Found	1	0.82	K.FLEIMSR.T	[129-135]		Not Used
	Confidence	PSM Ambiguity	Annotated Sequence	Modifications	# Protein Groups	# Proteins	Master Protein Accessions	Protein Accessions	# Missed Cleavages	Charge	DeltaScore	DeltaCn	Rank	m/z [Da]	MH+ [Da]	Theo. MH+ [Da]	DeltaM [ppm]	Deltam/z [Da]	Activation Type	MS Order	Isolation Interference [%]	Average Reporter S/N	Ion Inject Time [ms]	RT [min]	First Scan	Spectrum File	Abundance: 113	Abundance: 114	Abundance: 115	Abundance: 116	Abundance: 117	Abundance: 118	Abundance: 119	XCorr	Percolator q-Value	Percolator PEP
	Low	Selected	[K].FLEIMSR.[T]		1	1	c144228_g1	c144228_g1	0	2	0.0366	0	1	448.24	895.473	895.471	2.83	0.00127	HCD (High Energy Collision Dissociation)	MS2	0	19.1	50	22.7686	5412	SHUTSA.raw	39.5	19.7	29	14.1	12.9	18	19.6	0.82	0.9219	1
High	c182229_g1	0.158	0	2	1	1	1	1	468	52.9	5.27	0	1														Low	Low	Low	Low	Low	Low	Low
Checked	Annotated Sequence	Modifications in Master Proteins	Qvality PEP	Qvality q-value	# Protein Groups	# Proteins	# PSMs	Master Protein Accessions	Positions in Master Proteins	# Missed Cleavages	Theo. MH+ [Da]	# Razor Quan Results	Abundance Ratio: (114) / (113)	Abundance Ratio: (116) / (113)	Abundance Ratio: (117) / (113)	Abundance Ratio: (118) / (113)	Abundance Ratio: (119) / (113)	Abundances (Grouped): 113	Abundances (Grouped): 114	Abundances (Grouped): 115	Abundances (Grouped): 116	Abundances (Grouped): 117	Abundances (Grouped): 118	Abundances (Grouped): 119	Abundances (Grouped): 121	Quan Info	Found in Sample: [S98] F12: 114, Sample	Found in Sample: [S99] F12: 115, Sample	Found in Sample: [S100] F12: 116, Sample	Found in Sample: [S101] F12: 117, Sample	Found in Sample: [S102] F12: 118, Sample	Found in Sample: [S103] F12: 119, Sample	Found in Sample: [S104] F12: 121, Sample	Percolator PEP (by Search Engine): Sequest HT	XCorr (by Search Engine): Sequest HT	Sequence in Protein	Positions in Protein	Peptide Group Modifications in Protein	Quan Usage
FALSE	[R].LLADLFPGLK.[R]		1	0.882781	1	1	1	c182229_g1	c182229_g1 [336-345]	0	1086.66	0														No Quan Labels	Low	Low	Low	Low	Low	Low	Not Found	1	0.51	R.LLADLFPGLK.R	[336-345]		Not Used
	Confidence	PSM Ambiguity	Annotated Sequence	Modifications	# Protein Groups	# Proteins	Master Protein Accessions	Protein Accessions	# Missed Cleavages	Charge	DeltaScore	DeltaCn	Rank	m/z [Da]	MH+ [Da]	Theo. MH+ [Da]	DeltaM [ppm]	Deltam/z [Da]	Activation Type	MS Order	Isolation Interference [%]	Average Reporter S/N	Ion Inject Time [ms]	RT [min]	First Scan	Spectrum File	Abundance: 113	Abundance: 114	Abundance: 115	Abundance: 116	Abundance: 117	Abundance: 118	Abundance: 119	XCorr	Percolator q-Value	Percolator PEP
	Low	Unambiguous	[R].LLADLFPGLK.[R]		1	1	c182229_g1	c182229_g1	0	2	0.1373	0	1	543.835	1086.66	1086.66	6.23	0.00338	HCD (High Energy Collision Dissociation)	MS2	0	24	50	24.9696	6119	SHUTSA.raw	56.1	24.3	50	14.9	19.9	14.6	12.4	0.51	0.9015	1
High	c57941_g1	0.516	0	2	1	2	1	1	521	58.4	8.85	0	1														Low	Low	Low	Low	Low	Low	Low
Checked	Annotated Sequence	Modifications in Master Proteins	Qvality PEP	Qvality q-value	# Protein Groups	# Proteins	# PSMs	Master Protein Accessions	Positions in Master Proteins	# Missed Cleavages	Theo. MH+ [Da]	# Razor Quan Results	Abundance Ratio: (114) / (113)	Abundance Ratio: (116) / (113)	Abundance Ratio: (117) / (113)	Abundance Ratio: (118) / (113)	Abundance Ratio: (119) / (113)	Abundances (Grouped): 113	Abundances (Grouped): 114	Abundances (Grouped): 115	Abundances (Grouped): 116	Abundances (Grouped): 117	Abundances (Grouped): 118	Abundances (Grouped): 119	Abundances (Grouped): 121	Quan Info	Found in Sample: [S98] F12: 114, Sample	Found in Sample: [S99] F12: 115, Sample	Found in Sample: [S100] F12: 116, Sample	Found in Sample: [S101] F12: 117, Sample	Found in Sample: [S102] F12: 118, Sample	Found in Sample: [S103] F12: 119, Sample	Found in Sample: [S104] F12: 121, Sample	Percolator PEP (by Search Engine): Sequest HT	XCorr (by Search Engine): Sequest HT	Sequence in Protein	Positions in Protein	Peptide Group Modifications in Protein	Quan Usage
FALSE	[K].RPAEVWEPK.[A]		1	0.926357	1	1	2	c57941_g1	c57941_g1 [369-377]	0	1111.59	0														No Quan Labels	Low	Low	Low	Low	Low	Low	Not Found	1	0.77	K.RPAEVWEPK.A	[369-377]		Not Used
	Confidence	PSM Ambiguity	Annotated Sequence	Modifications	# Protein Groups	# Proteins	Master Protein Accessions	Protein Accessions	# Missed Cleavages	Charge	DeltaScore	DeltaCn	Rank	m/z [Da]	MH+ [Da]	Theo. MH+ [Da]	DeltaM [ppm]	Deltam/z [Da]	Activation Type	MS Order	Isolation Interference [%]	Average Reporter S/N	Ion Inject Time [ms]	RT [min]	First Scan	Spectrum File	Abundance: 113	Abundance: 114	Abundance: 115	Abundance: 116	Abundance: 117	Abundance: 118	Abundance: 119	XCorr	Percolator q-Value	Percolator PEP
	Low	Unambiguous	[K].RPAEVWEPK.[A]		1	1	c57941_g1	c57941_g1	0	3	0.4156	0	1	371.201	1111.59	1111.59	-0.62	-0.00023	HCD (High Energy Collision Dissociation)	MS2	52.4961	12.6	28.876	24.4306	5980	SHUTSA.raw	21.3	15	15	13.3	8.7	17	10.2	0.77	0.9301	1
	Low	Unambiguous	[K].RPAEVWEPK.[A]		1	1	c57941_g1	c57941_g1	0	3	0.3836	0	1	371.201	1111.59	1111.59	-1.61	-0.0006	HCD (High Energy Collision Dissociation)	MS2	44.3786	6.8	26.402	36.8767	9411	SHUTSA.raw	11.5	6.5	6.1	6.7	6.9	11.5	5	0.73	0.9423	1
High	c35488_g1	0.533	0	2	1	2	1	1	440	49.2	7.66	0	1														Low	Low	Low	Low	Low	Low	Low
Checked	Annotated Sequence	Modifications in Master Proteins	Qvality PEP	Qvality q-value	# Protein Groups	# Proteins	# PSMs	Master Protein Accessions	Positions in Master Proteins	# Missed Cleavages	Theo. MH+ [Da]	# Razor Quan Results	Abundance Ratio: (114) / (113)	Abundance Ratio: (116) / (113)	Abundance Ratio: (117) / (113)	Abundance Ratio: (118) / (113)	Abundance Ratio: (119) / (113)	Abundances (Grouped): 113	Abundances (Grouped): 114	Abundances (Grouped): 115	Abundances (Grouped): 116	Abundances (Grouped): 117	Abundances (Grouped): 118	Abundances (Grouped): 119	Abundances (Grouped): 121	Quan Info	Found in Sample: [S98] F12: 114, Sample	Found in Sample: [S99] F12: 115, Sample	Found in Sample: [S100] F12: 116, Sample	Found in Sample: [S101] F12: 117, Sample	Found in Sample: [S102] F12: 118, Sample	Found in Sample: [S103] F12: 119, Sample	Found in Sample: [S104] F12: 121, Sample	Percolator PEP (by Search Engine): Sequest HT	XCorr (by Search Engine): Sequest HT	Sequence in Protein	Positions in Protein	Peptide Group Modifications in Protein	Quan Usage
FALSE	[K].LPGTPQPQK.[K]		1	0.899187	1	1	2	c35488_g1	c35488_g1 [203-211]	0	965.541	0														No Quan Labels	Low	Low	Low	Low	Low	Low	Not Found	1	0.35	K.LPGTPQPQK.K	[203-211]		Not Used
	Confidence	PSM Ambiguity	Annotated Sequence	Modifications	# Protein Groups	# Proteins	Master Protein Accessions	Protein Accessions	# Missed Cleavages	Charge	DeltaScore	DeltaCn	Rank	m/z [Da]	MH+ [Da]	Theo. MH+ [Da]	DeltaM [ppm]	Deltam/z [Da]	Activation Type	MS Order	Isolation Interference [%]	Average Reporter S/N	Ion Inject Time [ms]	RT [min]	First Scan	Spectrum File	Abundance: 113	Abundance: 114	Abundance: 115	Abundance: 116	Abundance: 117	Abundance: 118	Abundance: 119	XCorr	Percolator q-Value	Percolator PEP
	Low	Selected	[K].LPGTPQPQK.[K]		1	1	c35488_g1	c35488_g1	0	2	0.0286	0	1	483.274	965.541	965.541	-0.53	-0.00026	HCD (High Energy Collision Dissociation)	MS2	0	15.4	50	8.682	1873	SHUTSA.raw	11.2	6.2	20.3	32.2	33.2	5.5	14.5	0.35	0.9041	1
	Low	Rejected	[K].LPGTPQPQK.[K]		1	1	c35488_g1	c35488_g1	0	2		0.0303	3	483.272	965.538	965.541	-3.95	-0.00191	HCD (High Energy Collision Dissociation)	MS2	0	8.5	50	10.4062	2248	SHUTSA.raw	8.9	4.5	15.7	12.6	12.9	5.8	7.3	0.32	0.9301	1
High	c72960_g1	0.276	0	12	1	1	1	1	224	25.3	9.91	0	1														Low	Low	Low	Low	Low	Low	Low
Checked	Annotated Sequence	Modifications in Master Proteins	Qvality PEP	Qvality q-value	# Protein Groups	# Proteins	# PSMs	Master Protein Accessions	Positions in Master Proteins	# Missed Cleavages	Theo. MH+ [Da]	# Razor Quan Results	Abundance Ratio: (114) / (113)	Abundance Ratio: (116) / (113)	Abundance Ratio: (117) / (113)	Abundance Ratio: (118) / (113)	Abundance Ratio: (119) / (113)	Abundances (Grouped): 113	Abundances (Grouped): 114	Abundances (Grouped): 115	Abundances (Grouped): 116	Abundances (Grouped): 117	Abundances (Grouped): 118	Abundances (Grouped): 119	Abundances (Grouped): 121	Quan Info	Found in Sample: [S98] F12: 114, Sample	Found in Sample: [S99] F12: 115, Sample	Found in Sample: [S100] F12: 116, Sample	Found in Sample: [S101] F12: 117, Sample	Found in Sample: [S102] F12: 118, Sample	Found in Sample: [S103] F12: 119, Sample	Found in Sample: [S104] F12: 121, Sample	Percolator PEP (by Search Engine): Sequest HT	XCorr (by Search Engine): Sequest HT	Sequence in Protein	Positions in Protein	Peptide Group Modifications in Protein	Quan Usage
FALSE	[R].HASDSGIDLPNMTQFGSSRDAKHPMK.[R]		1	0.918718	1	1	1	c72960_g1	c72960_g1 [127-152]	2	2827.33	0														No Quan Labels	Low	Low	Low	Low	Low	Low	Not Found	1	0.22	R.HASDSGIDLPNMTQFGSSRDAKHPMK.R	[127-152]		Not Used
	Confidence	PSM Ambiguity	Annotated Sequence	Modifications	# Protein Groups	# Proteins	Master Protein Accessions	Protein Accessions	# Missed Cleavages	Charge	DeltaScore	DeltaCn	Rank	m/z [Da]	MH+ [Da]	Theo. MH+ [Da]	DeltaM [ppm]	Deltam/z [Da]	Activation Type	MS Order	Isolation Interference [%]	Average Reporter S/N	Ion Inject Time [ms]	RT [min]	First Scan	Spectrum File	Abundance: 113	Abundance: 114	Abundance: 115	Abundance: 116	Abundance: 117	Abundance: 118	Abundance: 119	XCorr	Percolator q-Value	Percolator PEP
	Low	Selected	[R].HASDSGIDLPNMTQFGSSRDAKHPMK.[R]		1	1	c72960_g1	c72960_g1	2	2	0.0455	0	1	1414.15	2827.3	2827.33	-9.85	-0.01393	HCD (High Energy Collision Dissociation)	MS2	17.955	10.3	50	58.6863	14797	SHUTSA.raw	8.6	11.8	15.8	12.9	8.4	12.8	12	0.22	0.9106	1
High	c4627_g1	0.552	0	2	1	1	1	1	323	36.1	6.61	0	1														Low	Low	Low	Low	Low	Low	Low
Checked	Annotated Sequence	Modifications in Master Proteins	Qvality PEP	Qvality q-value	# Protein Groups	# Proteins	# PSMs	Master Protein Accessions	Positions in Master Proteins	# Missed Cleavages	Theo. MH+ [Da]	# Razor Quan Results	Abundance Ratio: (114) / (113)	Abundance Ratio: (116) / (113)	Abundance Ratio: (117) / (113)	Abundance Ratio: (118) / (113)	Abundance Ratio: (119) / (113)	Abundances (Grouped): 113	Abundances (Grouped): 114	Abundances (Grouped): 115	Abundances (Grouped): 116	Abundances (Grouped): 117	Abundances (Grouped): 118	Abundances (Grouped): 119	Abundances (Grouped): 121	Quan Info	Found in Sample: [S98] F12: 114, Sample	Found in Sample: [S99] F12: 115, Sample	Found in Sample: [S100] F12: 116, Sample	Found in Sample: [S101] F12: 117, Sample	Found in Sample: [S102] F12: 118, Sample	Found in Sample: [S103] F12: 119, Sample	Found in Sample: [S104] F12: 121, Sample	Percolator PEP (by Search Engine): Sequest HT	XCorr (by Search Engine): Sequest HT	Sequence in Protein	Positions in Protein	Peptide Group Modifications in Protein	Quan Usage
FALSE	[K].IGKTGK.[S]		1	0.855853	1	1	1	c4627_g1	c4627_g1 [151-156]	1	907.588	0														No Quan Values	Low	Low	Low	Low	Low	Low	Not Found	1	0.28	K.IGKTGK.S	[151-156]		Not Used
	Confidence	PSM Ambiguity	Annotated Sequence	Modifications	# Protein Groups	# Proteins	Master Protein Accessions	Protein Accessions	# Missed Cleavages	Charge	DeltaScore	DeltaCn	Rank	m/z [Da]	MH+ [Da]	Theo. MH+ [Da]	DeltaM [ppm]	Deltam/z [Da]	Activation Type	MS Order	Isolation Interference [%]	Average Reporter S/N	Ion Inject Time [ms]	RT [min]	First Scan	Spectrum File	Abundance: 113	Abundance: 114	Abundance: 115	Abundance: 116	Abundance: 117	Abundance: 118	Abundance: 119	XCorr	Percolator q-Value	Percolator PEP
	Low	Unambiguous	[K].IGkTGK.[S]	K3(iTRAQ8plex)	1	1	c4627_g1	c4627_g1	1	2	0.0714	0	1	454.295	907.584	907.588	-4.62	-0.0021	HCD (High Energy Collision Dissociation)	MS2	54.1083	122.5	8.018	23.1687	5580	SHUTSA.raw	53.6	542.4	296.5	14.6	33.7	11.7	27.4	0.28	0.8974	1
High	c79384_g6	0.64	0	2	1	2	1	1	605	68	7.37	0	1														Low	Low	Low	Low	Low	Low	Low
Checked	Annotated Sequence	Modifications in Master Proteins	Qvality PEP	Qvality q-value	# Protein Groups	# Proteins	# PSMs	Master Protein Accessions	Positions in Master Proteins	# Missed Cleavages	Theo. MH+ [Da]	# Razor Quan Results	Abundance Ratio: (114) / (113)	Abundance Ratio: (116) / (113)	Abundance Ratio: (117) / (113)	Abundance Ratio: (118) / (113)	Abundance Ratio: (119) / (113)	Abundances (Grouped): 113	Abundances (Grouped): 114	Abundances (Grouped): 115	Abundances (Grouped): 116	Abundances (Grouped): 117	Abundances (Grouped): 118	Abundances (Grouped): 119	Abundances (Grouped): 121	Quan Info	Found in Sample: [S98] F12: 114, Sample	Found in Sample: [S99] F12: 115, Sample	Found in Sample: [S100] F12: 116, Sample	Found in Sample: [S101] F12: 117, Sample	Found in Sample: [S102] F12: 118, Sample	Found in Sample: [S103] F12: 119, Sample	Found in Sample: [S104] F12: 121, Sample	Percolator PEP (by Search Engine): Sequest HT	XCorr (by Search Engine): Sequest HT	Sequence in Protein	Positions in Protein	Peptide Group Modifications in Protein	Quan Usage
FALSE	[K].SRVAIVGNNGVGK.[S]		1	0.921339	1	1	2	c79384_g6	c79384_g6 [495-507]	1	1270.72	0														No Quan Labels	Low	Low	Low	Low	Low	Low	Not Found	1	0.68	K.SRVAIVGNNGVGK.S	[495-507]		Not Used
	Confidence	PSM Ambiguity	Annotated Sequence	Modifications	# Protein Groups	# Proteins	Master Protein Accessions	Protein Accessions	# Missed Cleavages	Charge	DeltaScore	DeltaCn	Rank	m/z [Da]	MH+ [Da]	Theo. MH+ [Da]	DeltaM [ppm]	Deltam/z [Da]	Activation Type	MS Order	Isolation Interference [%]	Average Reporter S/N	Ion Inject Time [ms]	RT [min]	First Scan	Spectrum File	Abundance: 113	Abundance: 114	Abundance: 115	Abundance: 116	Abundance: 117	Abundance: 118	Abundance: 119	XCorr	Percolator q-Value	Percolator PEP
	Low	Selected	[K].SRVAIVGNNGVGK.[S]		1	1	c79384_g6	c79384_g6	1	2	0	0	1	635.863	1270.72	1270.72	-3.48	-0.00221	HCD (High Energy Collision Dissociation)	MS2	66.9909	12.4	50	64.2657	16077	SHUTSA.raw	29.2	8.7	17.1	18	7.6	8.9	9.7	0.68	0.9219	1
	Low	Rejected	[K].SRVAIVGNNGVGK.[S]		1	1	c79384_g6	c79384_g6	1	2		0.0179	3	635.866	1270.72	1270.72	1.71	0.00109	HCD (High Energy Collision Dissociation)	MS2	50.4791	4.9	50	66.3162	16518	SHUTSA.raw	7.8	3.1	7.1	5.5	4.5	6.2	5	0.55	0.9272	1
High	c136435_g1	0.593	0	23	1	1	1	1	77	8	8.02	0	1														Low	Low	Low	Low	Low	Low	Low
Checked	Annotated Sequence	Modifications in Master Proteins	Qvality PEP	Qvality q-value	# Protein Groups	# Proteins	# PSMs	Master Protein Accessions	Positions in Master Proteins	# Missed Cleavages	Theo. MH+ [Da]	# Razor Quan Results	Abundance Ratio: (114) / (113)	Abundance Ratio: (116) / (113)	Abundance Ratio: (117) / (113)	Abundance Ratio: (118) / (113)	Abundance Ratio: (119) / (113)	Abundances (Grouped): 113	Abundances (Grouped): 114	Abundances (Grouped): 115	Abundances (Grouped): 116	Abundances (Grouped): 117	Abundances (Grouped): 118	Abundances (Grouped): 119	Abundances (Grouped): 121	Quan Info	Found in Sample: [S98] F12: 114, Sample	Found in Sample: [S99] F12: 115, Sample	Found in Sample: [S100] F12: 116, Sample	Found in Sample: [S101] F12: 117, Sample	Found in Sample: [S102] F12: 118, Sample	Found in Sample: [S103] F12: 119, Sample	Found in Sample: [S104] F12: 121, Sample	Percolator PEP (by Search Engine): Sequest HT	XCorr (by Search Engine): Sequest HT	Sequence in Protein	Positions in Protein	Peptide Group Modifications in Protein	Quan Usage
FALSE	[K].VKSKILIVSKPCGNPIGK.[E]		1	0.923095	1	1	1	c136435_g1	c136435_g1 [34-51]	2	2242.36	0														No Quan Values	Low	Low	Low	Low	Low	Low	Not Found	1	0.44	K.VKSKILIVSKPCGNPIGK.E	[34-51]		Not Used
	Confidence	PSM Ambiguity	Annotated Sequence	Modifications	# Protein Groups	# Proteins	Master Protein Accessions	Protein Accessions	# Missed Cleavages	Charge	DeltaScore	DeltaCn	Rank	m/z [Da]	MH+ [Da]	Theo. MH+ [Da]	DeltaM [ppm]	Deltam/z [Da]	Activation Type	MS Order	Isolation Interference [%]	Average Reporter S/N	Ion Inject Time [ms]	RT [min]	First Scan	Spectrum File	Abundance: 113	Abundance: 114	Abundance: 115	Abundance: 116	Abundance: 117	Abundance: 118	Abundance: 119	XCorr	Percolator q-Value	Percolator PEP
	Low	Unambiguous	[K].VKSKILIVSkPcGNPIGK.[E]	K10(iTRAQ8plex); C12(Carbamidomethyl)	1	1	c136435_g1	c136435_g1	2	2	0.2727	0	1	1121.69	2242.37	2242.36	3.21	0.0036	HCD (High Energy Collision Dissociation)	MS2	28.6499	7.9	50	74.7657	19022	SHUTSA.raw	9.6	8	8.3	11.6	7	9.7	9.2	0.44	0.9291	1
High	c131393_g1	0.302	0	9	1	1	1	1	80	8.2	10.65	0	1														Low	Low	Low	Low	Low	Low	Low
Checked	Annotated Sequence	Modifications in Master Proteins	Qvality PEP	Qvality q-value	# Protein Groups	# Proteins	# PSMs	Master Protein Accessions	Positions in Master Proteins	# Missed Cleavages	Theo. MH+ [Da]	# Razor Quan Results	Abundance Ratio: (114) / (113)	Abundance Ratio: (116) / (113)	Abundance Ratio: (117) / (113)	Abundance Ratio: (118) / (113)	Abundance Ratio: (119) / (113)	Abundances (Grouped): 113	Abundances (Grouped): 114	Abundances (Grouped): 115	Abundances (Grouped): 116	Abundances (Grouped): 117	Abundances (Grouped): 118	Abundances (Grouped): 119	Abundances (Grouped): 121	Quan Info	Found in Sample: [S98] F12: 114, Sample	Found in Sample: [S99] F12: 115, Sample	Found in Sample: [S100] F12: 116, Sample	Found in Sample: [S101] F12: 117, Sample	Found in Sample: [S102] F12: 118, Sample	Found in Sample: [S103] F12: 119, Sample	Found in Sample: [S104] F12: 121, Sample	Percolator PEP (by Search Engine): Sequest HT	XCorr (by Search Engine): Sequest HT	Sequence in Protein	Positions in Protein	Peptide Group Modifications in Protein	Quan Usage
FALSE	[K].AARRNGK.[A]		1	0.844476	1	1	1	c131393_g1	c131393_g1 [56-62]	2	772.454	0														No Quan Labels	Low	Low	Low	Low	Low	Low	Not Found	1	0.46	K.AARRNGK.A	[56-62]		Not Used
	Confidence	PSM Ambiguity	Annotated Sequence	Modifications	# Protein Groups	# Proteins	Master Protein Accessions	Protein Accessions	# Missed Cleavages	Charge	DeltaScore	DeltaCn	Rank	m/z [Da]	MH+ [Da]	Theo. MH+ [Da]	DeltaM [ppm]	Deltam/z [Da]	Activation Type	MS Order	Isolation Interference [%]	Average Reporter S/N	Ion Inject Time [ms]	RT [min]	First Scan	Spectrum File	Abundance: 113	Abundance: 114	Abundance: 115	Abundance: 116	Abundance: 117	Abundance: 118	Abundance: 119	XCorr	Percolator q-Value	Percolator PEP
	Low	Selected	[K].AARRNGK.[A]		1	1	c131393_g1	c131393_g1	2	2	0.0435	0	1	386.731	772.455	772.454	1.6	0.00062	HCD (High Energy Collision Dissociation)	MS2	87.9271	5.1	4.772	23.0131	5514	SHUTSA.raw	10.5	6.2	6.8	4.1	3.9	6.2	3	0.46	0.8856	1
High	c97961_g1	0.615	0	2	1	1	1	1	646	72.7	6.38	0	1														Low	Low	Low	Low	Low	Low	Low
Checked	Annotated Sequence	Modifications in Master Proteins	Qvality PEP	Qvality q-value	# Protein Groups	# Proteins	# PSMs	Master Protein Accessions	Positions in Master Proteins	# Missed Cleavages	Theo. MH+ [Da]	# Razor Quan Results	Abundance Ratio: (114) / (113)	Abundance Ratio: (116) / (113)	Abundance Ratio: (117) / (113)	Abundance Ratio: (118) / (113)	Abundance Ratio: (119) / (113)	Abundances (Grouped): 113	Abundances (Grouped): 114	Abundances (Grouped): 115	Abundances (Grouped): 116	Abundances (Grouped): 117	Abundances (Grouped): 118	Abundances (Grouped): 119	Abundances (Grouped): 121	Quan Info	Found in Sample: [S98] F12: 114, Sample	Found in Sample: [S99] F12: 115, Sample	Found in Sample: [S100] F12: 116, Sample	Found in Sample: [S101] F12: 117, Sample	Found in Sample: [S102] F12: 118, Sample	Found in Sample: [S103] F12: 119, Sample	Found in Sample: [S104] F12: 121, Sample	Percolator PEP (by Search Engine): Sequest HT	XCorr (by Search Engine): Sequest HT	Sequence in Protein	Positions in Protein	Peptide Group Modifications in Protein	Quan Usage
FALSE	[K].LLECRASPNGPR.[V]		1	0.844476	1	1	1	c97961_g1	c97961_g1 [453-464]	1	1369.7	0														No Quan Labels	Low	Low	Low	Low	Low	Low	Not Found	1	0.51	K.LLECRASPNGPR.V	[453-464]		Not Used
	Confidence	PSM Ambiguity	Annotated Sequence	Modifications	# Protein Groups	# Proteins	Master Protein Accessions	Protein Accessions	# Missed Cleavages	Charge	DeltaScore	DeltaCn	Rank	m/z [Da]	MH+ [Da]	Theo. MH+ [Da]	DeltaM [ppm]	Deltam/z [Da]	Activation Type	MS Order	Isolation Interference [%]	Average Reporter S/N	Ion Inject Time [ms]	RT [min]	First Scan	Spectrum File	Abundance: 113	Abundance: 114	Abundance: 115	Abundance: 116	Abundance: 117	Abundance: 118	Abundance: 119	XCorr	Percolator q-Value	Percolator PEP
	Low	Selected	[K].LLEcRASPNGPR.[V]	C4(Carbamidomethyl)	1	1	c97961_g1	c97961_g1	1	3	0	0	1	457.237	1369.7	1369.7	-3.49	-0.00159	HCD (High Energy Collision Dissociation)	MS2	16.7902	26.6	50	30.2191	7587	SHUTSA.raw	44.4	40.4	35.2	12.7	23.2	29.4	27.7	0.51	0.8974	1
High	c103260_g1	0.696	0	8	1	1	1	1	75	8.3	5.19	0	1	0.704	0.644	0.531	0.363	0.702	0.539	178.4	125.6	114.9	94.8	64.8	125.3	96.1	Low	Low	Low	Low	Low	Low	Low
Checked	Annotated Sequence	Modifications in Master Proteins	Qvality PEP	Qvality q-value	# Protein Groups	# Proteins	# PSMs	Master Protein Accessions	Positions in Master Proteins	# Missed Cleavages	Theo. MH+ [Da]	# Razor Quan Results	Abundance Ratio: (114) / (113)	Abundance Ratio: (116) / (113)	Abundance Ratio: (117) / (113)	Abundance Ratio: (118) / (113)	Abundance Ratio: (119) / (113)	Abundances (Grouped): 113	Abundances (Grouped): 114	Abundances (Grouped): 115	Abundances (Grouped): 116	Abundances (Grouped): 117	Abundances (Grouped): 118	Abundances (Grouped): 119	Abundances (Grouped): 121	Quan Info	Found in Sample: [S98] F12: 114, Sample	Found in Sample: [S99] F12: 115, Sample	Found in Sample: [S100] F12: 116, Sample	Found in Sample: [S101] F12: 117, Sample	Found in Sample: [S102] F12: 118, Sample	Found in Sample: [S103] F12: 119, Sample	Found in Sample: [S104] F12: 121, Sample	Percolator PEP (by Search Engine): Sequest HT	XCorr (by Search Engine): Sequest HT	Sequence in Protein	Positions in Protein	Peptide Group Modifications in Protein	Quan Usage
FALSE	[R].LAALKP.[-]		1	0.926357	1	1	1	c103260_g1	c103260_g1 [70-75]	0	916.613	0	0.704	0.531	0.363	0.702	0.539	178.4	125.6	114.9	94.8	64.8	125.3	96.1			Low	Low	Low	Low	Low	Low	Not Found	1	0.61	R.LAALKP.-	[70-75]		Used
	Confidence	PSM Ambiguity	Annotated Sequence	Modifications	# Protein Groups	# Proteins	Master Protein Accessions	Protein Accessions	# Missed Cleavages	Charge	DeltaScore	DeltaCn	Rank	m/z [Da]	MH+ [Da]	Theo. MH+ [Da]	DeltaM [ppm]	Deltam/z [Da]	Activation Type	MS Order	Isolation Interference [%]	Average Reporter S/N	Ion Inject Time [ms]	RT [min]	First Scan	Spectrum File	Abundance: 113	Abundance: 114	Abundance: 115	Abundance: 116	Abundance: 117	Abundance: 118	Abundance: 119	XCorr	Percolator q-Value	Percolator PEP
	Low	Unambiguous	[R].LAALkP.[-]	K5(iTRAQ8plex)	1	1	c103260_g1	c103260_g1	0	2	0.2131	0	1	458.808	916.609	916.613	-4.28	-0.00196	HCD (High Energy Collision Dissociation)	MS2	49.2186	69.2	50	23.3209	5642	SHUTSA.raw	135.6	85.1	98	53.9	35.5	81.3	64.1	0.61	0.9301	1
High	c109880_g1	0.842	0	4	1	1	1	1	147	16.6	7.71	0	1														Low	Low	Low	Low	Low	Low	Low
Checked	Annotated Sequence	Modifications in Master Proteins	Qvality PEP	Qvality q-value	# Protein Groups	# Proteins	# PSMs	Master Protein Accessions	Positions in Master Proteins	# Missed Cleavages	Theo. MH+ [Da]	# Razor Quan Results	Abundance Ratio: (114) / (113)	Abundance Ratio: (116) / (113)	Abundance Ratio: (117) / (113)	Abundance Ratio: (118) / (113)	Abundance Ratio: (119) / (113)	Abundances (Grouped): 113	Abundances (Grouped): 114	Abundances (Grouped): 115	Abundances (Grouped): 116	Abundances (Grouped): 117	Abundances (Grouped): 118	Abundances (Grouped): 119	Abundances (Grouped): 121	Quan Info	Found in Sample: [S98] F12: 114, Sample	Found in Sample: [S99] F12: 115, Sample	Found in Sample: [S100] F12: 116, Sample	Found in Sample: [S101] F12: 117, Sample	Found in Sample: [S102] F12: 118, Sample	Found in Sample: [S103] F12: 119, Sample	Found in Sample: [S104] F12: 121, Sample	Percolator PEP (by Search Engine): Sequest HT	XCorr (by Search Engine): Sequest HT	Sequence in Protein	Positions in Protein	Peptide Group Modifications in Protein	Quan Usage
FALSE	[R].LRIGTV.[-]		1	0.868462	1	1	1	c109880_g1	c109880_g1 [142-147]	1	658.425	0														No Quan Labels	Low	Low	Low	Low	Low	Low	Low	1	0.43	R.LRIGTV.-	[142-147]		Not Used
	Confidence	PSM Ambiguity	Annotated Sequence	Modifications	# Protein Groups	# Proteins	Master Protein Accessions	Protein Accessions	# Missed Cleavages	Charge	DeltaScore	DeltaCn	Rank	m/z [Da]	MH+ [Da]	Theo. MH+ [Da]	DeltaM [ppm]	Deltam/z [Da]	Activation Type	MS Order	Isolation Interference [%]	Average Reporter S/N	Ion Inject Time [ms]	RT [min]	First Scan	Spectrum File	Abundance: 113	Abundance: 114	Abundance: 115	Abundance: 116	Abundance: 117	Abundance: 118	Abundance: 119	XCorr	Percolator q-Value	Percolator PEP
	Low	Unambiguous	[R].LRIGTV.[-]		1	1	c109880_g1	c109880_g1	1	2	0.2558	0	1	329.719	658.431	658.425	8.95	0.00295	HCD (High Energy Collision Dissociation)	MS2	28.8984	20.7	50	71.749	18120	SHUTSA.raw	26.3	17.7	45.5	20.9	14.1	15.5	20.7	0.43	0.8974	1
High	c140705_g1	0.4	0	4	1	1	1	1	229	24.9	11.69	0	1														Low	Low	Low	Low	Low	Low	Low
Checked	Annotated Sequence	Modifications in Master Proteins	Qvality PEP	Qvality q-value	# Protein Groups	# Proteins	# PSMs	Master Protein Accessions	Positions in Master Proteins	# Missed Cleavages	Theo. MH+ [Da]	# Razor Quan Results	Abundance Ratio: (114) / (113)	Abundance Ratio: (116) / (113)	Abundance Ratio: (117) / (113)	Abundance Ratio: (118) / (113)	Abundance Ratio: (119) / (113)	Abundances (Grouped): 113	Abundances (Grouped): 114	Abundances (Grouped): 115	Abundances (Grouped): 116	Abundances (Grouped): 117	Abundances (Grouped): 118	Abundances (Grouped): 119	Abundances (Grouped): 121	Quan Info	Found in Sample: [S98] F12: 114, Sample	Found in Sample: [S99] F12: 115, Sample	Found in Sample: [S100] F12: 116, Sample	Found in Sample: [S101] F12: 117, Sample	Found in Sample: [S102] F12: 118, Sample	Found in Sample: [S103] F12: 119, Sample	Found in Sample: [S104] F12: 121, Sample	Percolator PEP (by Search Engine): Sequest HT	XCorr (by Search Engine): Sequest HT	Sequence in Protein	Positions in Protein	Peptide Group Modifications in Protein	Quan Usage
FALSE	[K].TKSALNKPSK.[R]		1	0.882781	1	1	1	c140705_g1	c140705_g1 [48-57]	1	1073.63	0														No Quan Labels	Low	Low	Low	Low	Low	Low	Not Found	1	0.72	K.TKSALNKPSK.R	[48-57]		Not Used
	Confidence	PSM Ambiguity	Annotated Sequence	Modifications	# Protein Groups	# Proteins	Master Protein Accessions	Protein Accessions	# Missed Cleavages	Charge	DeltaScore	DeltaCn	Rank	m/z [Da]	MH+ [Da]	Theo. MH+ [Da]	DeltaM [ppm]	Deltam/z [Da]	Activation Type	MS Order	Isolation Interference [%]	Average Reporter S/N	Ion Inject Time [ms]	RT [min]	First Scan	Spectrum File	Abundance: 113	Abundance: 114	Abundance: 115	Abundance: 116	Abundance: 117	Abundance: 118	Abundance: 119	XCorr	Percolator q-Value	Percolator PEP
	Low	Unambiguous	[K].TKSALNKPSK.[R]		1	1	c140705_g1	c140705_g1	1	2	0.1667	0	1	537.316	1073.62	1073.63	-6.65	-0.00357	HCD (High Energy Collision Dissociation)	MS2		19.5	50	33.9062	8595	SHUTSA.raw	27.1	18.2	47.8	13.7	10.6	26.1	12.7	0.72	0.8974	1
High	c70869_g1	0.174	0	4	1	1	1	1	363	40.7	6.46	0	1	0.602	0.376	0.241	0.193	0.592	0.507	227.9	137.2	85.6	55	43.9	134.9	115.6	Low	Low	Low	Low	Low	Low	Low
Checked	Annotated Sequence	Modifications in Master Proteins	Qvality PEP	Qvality q-value	# Protein Groups	# Proteins	# PSMs	Master Protein Accessions	Positions in Master Proteins	# Missed Cleavages	Theo. MH+ [Da]	# Razor Quan Results	Abundance Ratio: (114) / (113)	Abundance Ratio: (116) / (113)	Abundance Ratio: (117) / (113)	Abundance Ratio: (118) / (113)	Abundance Ratio: (119) / (113)	Abundances (Grouped): 113	Abundances (Grouped): 114	Abundances (Grouped): 115	Abundances (Grouped): 116	Abundances (Grouped): 117	Abundances (Grouped): 118	Abundances (Grouped): 119	Abundances (Grouped): 121	Quan Info	Found in Sample: [S98] F12: 114, Sample	Found in Sample: [S99] F12: 115, Sample	Found in Sample: [S100] F12: 116, Sample	Found in Sample: [S101] F12: 117, Sample	Found in Sample: [S102] F12: 118, Sample	Found in Sample: [S103] F12: 119, Sample	Found in Sample: [S104] F12: 121, Sample	Percolator PEP (by Search Engine): Sequest HT	XCorr (by Search Engine): Sequest HT	Sequence in Protein	Positions in Protein	Peptide Group Modifications in Protein	Quan Usage
FALSE	[R].GILAQAGGVSGMGTK.[M]		1	0.882781	1	1	1	c70869_g1	c70869_g1 [119-133]	0	1666.91	1	0.602	0.241	0.193	0.592	0.507	227.9	137.2	85.6	55	43.9	134.9	115.6			Low	Low	Low	Low	Low	Low	Not Found	1	0.98	R.GILAQAGGVSGMGTK.M	[119-133]		Used
	Confidence	PSM Ambiguity	Annotated Sequence	Modifications	# Protein Groups	# Proteins	Master Protein Accessions	Protein Accessions	# Missed Cleavages	Charge	DeltaScore	DeltaCn	Rank	m/z [Da]	MH+ [Da]	Theo. MH+ [Da]	DeltaM [ppm]	Deltam/z [Da]	Activation Type	MS Order	Isolation Interference [%]	Average Reporter S/N	Ion Inject Time [ms]	RT [min]	First Scan	Spectrum File	Abundance: 113	Abundance: 114	Abundance: 115	Abundance: 116	Abundance: 117	Abundance: 118	Abundance: 119	XCorr	Percolator q-Value	Percolator PEP
	Low	Selected	[R].GILAQAGGVSGmGTk.[M]	M12(Oxidation); K15(iTRAQ8plex)	1	1	c70869_g1	c70869_g1	0	3	0.0102	0	1	556.31	1666.92	1666.91	3.08	0.00171	HCD (High Energy Collision Dissociation)	MS2	6.01221	15.4	31.268	34.209	8681	SHUTSA.raw	38.2	20.5	16.1	6.9	5.3	19.3	17	0.98	0.8974	1
High	c87657_g1	0.457	0	15	1	2	1	1	48	5.6	5.38	0	1														Low	Low	Low	Low	Low	Low	Low
Checked	Annotated Sequence	Modifications in Master Proteins	Qvality PEP	Qvality q-value	# Protein Groups	# Proteins	# PSMs	Master Protein Accessions	Positions in Master Proteins	# Missed Cleavages	Theo. MH+ [Da]	# Razor Quan Results	Abundance Ratio: (114) / (113)	Abundance Ratio: (116) / (113)	Abundance Ratio: (117) / (113)	Abundance Ratio: (118) / (113)	Abundance Ratio: (119) / (113)	Abundances (Grouped): 113	Abundances (Grouped): 114	Abundances (Grouped): 115	Abundances (Grouped): 116	Abundances (Grouped): 117	Abundances (Grouped): 118	Abundances (Grouped): 119	Abundances (Grouped): 121	Quan Info	Found in Sample: [S98] F12: 114, Sample	Found in Sample: [S99] F12: 115, Sample	Found in Sample: [S100] F12: 116, Sample	Found in Sample: [S101] F12: 117, Sample	Found in Sample: [S102] F12: 118, Sample	Found in Sample: [S103] F12: 119, Sample	Found in Sample: [S104] F12: 121, Sample	Percolator PEP (by Search Engine): Sequest HT	XCorr (by Search Engine): Sequest HT	Sequence in Protein	Positions in Protein	Peptide Group Modifications in Protein	Quan Usage
FALSE	[R].ILLTLSK.[D]		1	0.926357	1	1	1	c87657_g1	c87657_g1 [4-10]	0	1091.73	0														No Quan Values	Low	Low	Low	Low	Low	Low	Not Found	1	0.25	R.ILLTLSK.D	[4-10]		Not Used
	Confidence	PSM Ambiguity	Annotated Sequence	Modifications	# Protein Groups	# Proteins	Master Protein Accessions	Protein Accessions	# Missed Cleavages	Charge	DeltaScore	DeltaCn	Rank	m/z [Da]	MH+ [Da]	Theo. MH+ [Da]	DeltaM [ppm]	Deltam/z [Da]	Activation Type	MS Order	Isolation Interference [%]	Average Reporter S/N	Ion Inject Time [ms]	RT [min]	First Scan	Spectrum File	Abundance: 113	Abundance: 114	Abundance: 115	Abundance: 116	Abundance: 117	Abundance: 118	Abundance: 119	XCorr	Percolator q-Value	Percolator PEP
	Low	Rejected	[R].ILLTLSk.[D]	K7(iTRAQ8plex)	1	1	c87657_g1	c87657_g1	0	2		0.0385	3	546.367	1091.73	1091.73	-6.33	-0.00345	HCD (High Energy Collision Dissociation)	MS2	53.5198	18.9	50	25.9604	6402	SHUTSA.raw	42.3	32	36.6	10.4	5.9	12.6	11.7	0.25	0.9301	1
FALSE	[R].ILLTLSK.[D]		1	0.939969	1	1	1	c87657_g1	c87657_g1 [4-10]	0	787.529	0														No Quan Labels	Low	Low	Low	Low	Low	Low	Not Found	1	0.22	R.ILLTLSK.D	[4-10]		Not Used
	Confidence	PSM Ambiguity	Annotated Sequence	Modifications	# Protein Groups	# Proteins	Master Protein Accessions	Protein Accessions	# Missed Cleavages	Charge	DeltaScore	DeltaCn	Rank	m/z [Da]	MH+ [Da]	Theo. MH+ [Da]	DeltaM [ppm]	Deltam/z [Da]	Activation Type	MS Order	Isolation Interference [%]	Average Reporter S/N	Ion Inject Time [ms]	RT [min]	First Scan	Spectrum File	Abundance: 113	Abundance: 114	Abundance: 115	Abundance: 116	Abundance: 117	Abundance: 118	Abundance: 119	XCorr	Percolator q-Value	Percolator PEP
	Low	Unambiguous	[R].ILLTLSK.[D]		1	1	c87657_g1	c87657_g1	0	2	0.1364	0	1	394.269	787.53	787.529	1.82	0.00072	HCD (High Energy Collision Dissociation)	MS2	69.2246	325.9	50	25.1879	6174	SHUTSA.raw	399.3	463.9	358	431.6	480.8	225	248.8	0.22	0.9525	1
High	c143518_g1	0.432	0	2	1	1	1	1	393	42.2	8.09	0	1														Low	Low	Low	Low	Low	Low	Low
Checked	Annotated Sequence	Modifications in Master Proteins	Qvality PEP	Qvality q-value	# Protein Groups	# Proteins	# PSMs	Master Protein Accessions	Positions in Master Proteins	# Missed Cleavages	Theo. MH+ [Da]	# Razor Quan Results	Abundance Ratio: (114) / (113)	Abundance Ratio: (116) / (113)	Abundance Ratio: (117) / (113)	Abundance Ratio: (118) / (113)	Abundance Ratio: (119) / (113)	Abundances (Grouped): 113	Abundances (Grouped): 114	Abundances (Grouped): 115	Abundances (Grouped): 116	Abundances (Grouped): 117	Abundances (Grouped): 118	Abundances (Grouped): 119	Abundances (Grouped): 121	Quan Info	Found in Sample: [S98] F12: 114, Sample	Found in Sample: [S99] F12: 115, Sample	Found in Sample: [S100] F12: 116, Sample	Found in Sample: [S101] F12: 117, Sample	Found in Sample: [S102] F12: 118, Sample	Found in Sample: [S103] F12: 119, Sample	Found in Sample: [S104] F12: 121, Sample	Percolator PEP (by Search Engine): Sequest HT	XCorr (by Search Engine): Sequest HT	Sequence in Protein	Positions in Protein	Peptide Group Modifications in Protein	Quan Usage
FALSE	[R].APKVMTK.[A]		1	0.882781	1	1	1	c143518_g1	c143518_g1 [76-82]	1	790.449	0														No Quan Labels	Low	Low	Low	Low	Low	Low	Not Found	1	0.63	R.APKVMTK.A	[76-82]		Not Used
	Confidence	PSM Ambiguity	Annotated Sequence	Modifications	# Protein Groups	# Proteins	Master Protein Accessions	Protein Accessions	# Missed Cleavages	Charge	DeltaScore	DeltaCn	Rank	m/z [Da]	MH+ [Da]	Theo. MH+ [Da]	DeltaM [ppm]	Deltam/z [Da]	Activation Type	MS Order	Isolation Interference [%]	Average Reporter S/N	Ion Inject Time [ms]	RT [min]	First Scan	Spectrum File	Abundance: 113	Abundance: 114	Abundance: 115	Abundance: 116	Abundance: 117	Abundance: 118	Abundance: 119	XCorr	Percolator q-Value	Percolator PEP
	Low	Unambiguous	[R].APKVmTK.[A]	M5(Oxidation)	1	1	c143518_g1	c143518_g1	1	2	0.0794	0	1	395.726	790.446	790.449	-4.47	-0.00177	HCD (High Energy Collision Dissociation)	MS2	40.2096	79.9	50	21.4252	4943	SHUTSA.raw	78.1	54.5	79.2	105.9	83.1	87	151.5	0.63	0.8974	1
High	c56717_g1	0.444	0	1	1	1	1	1	751	82.8	5.38	0	1	1.041	0.895	1.072	1.095	0.88	1.043	113.9	118.6	101.9	122	124.7	100.2	118.8	Low	Low	Low	Low	Low	Low	Low
Checked	Annotated Sequence	Modifications in Master Proteins	Qvality PEP	Qvality q-value	# Protein Groups	# Proteins	# PSMs	Master Protein Accessions	Positions in Master Proteins	# Missed Cleavages	Theo. MH+ [Da]	# Razor Quan Results	Abundance Ratio: (114) / (113)	Abundance Ratio: (116) / (113)	Abundance Ratio: (117) / (113)	Abundance Ratio: (118) / (113)	Abundance Ratio: (119) / (113)	Abundances (Grouped): 113	Abundances (Grouped): 114	Abundances (Grouped): 115	Abundances (Grouped): 116	Abundances (Grouped): 117	Abundances (Grouped): 118	Abundances (Grouped): 119	Abundances (Grouped): 121	Quan Info	Found in Sample: [S98] F12: 114, Sample	Found in Sample: [S99] F12: 115, Sample	Found in Sample: [S100] F12: 116, Sample	Found in Sample: [S101] F12: 117, Sample	Found in Sample: [S102] F12: 118, Sample	Found in Sample: [S103] F12: 119, Sample	Found in Sample: [S104] F12: 121, Sample	Percolator PEP (by Search Engine): Sequest HT	XCorr (by Search Engine): Sequest HT	Sequence in Protein	Positions in Protein	Peptide Group Modifications in Protein	Quan Usage
FALSE	[K].LKEQLCIILQK.[V]		1	0.844476	1	1	1	c56717_g1	c56717_g1 [428-438]	1	2298.43	0	1.041	1.072	1.095	0.88	1.043	113.9	118.6	101.9	122	124.7	100.2	118.8			Low	Low	Low	Low	Low	Low	Not Found	1	0.24	K.LKEQLCIILQK.V	[428-438]		Used
	Confidence	PSM Ambiguity	Annotated Sequence	Modifications	# Protein Groups	# Proteins	Master Protein Accessions	Protein Accessions	# Missed Cleavages	Charge	DeltaScore	DeltaCn	Rank	m/z [Da]	MH+ [Da]	Theo. MH+ [Da]	DeltaM [ppm]	Deltam/z [Da]	Activation Type	MS Order	Isolation Interference [%]	Average Reporter S/N	Ion Inject Time [ms]	RT [min]	First Scan	Spectrum File	Abundance: 113	Abundance: 114	Abundance: 115	Abundance: 116	Abundance: 117	Abundance: 118	Abundance: 119	XCorr	Percolator q-Value	Percolator PEP
	Low	Unambiguous	[K].lkEQLcIILQk.[V]	N-Term(iTRAQ8plex); K2(iTRAQ8plex); C6(Carbamidomethyl); K11(iTRAQ8plex)	1	1	c56717_g1	c56717_g1	1	2	0.3333	0	1	1149.72	2298.43	2298.43	-1.46	-0.00168	HCD (High Energy Collision Dissociation)	MS2	0	18.3	50	70.2218	17641	SHUTSA.raw	23.7	22	23.8	19	18.7	17.8	21.7	0.24	0.8974	1
High	c54715_g1	0.356	0	6	1	3	1	1	128	14.5	8.78	0	1														Low	Low	Low	Low	Low	Low	Low
Checked	Annotated Sequence	Modifications in Master Proteins	Qvality PEP	Qvality q-value	# Protein Groups	# Proteins	# PSMs	Master Protein Accessions	Positions in Master Proteins	# Missed Cleavages	Theo. MH+ [Da]	# Razor Quan Results	Abundance Ratio: (114) / (113)	Abundance Ratio: (116) / (113)	Abundance Ratio: (117) / (113)	Abundance Ratio: (118) / (113)	Abundance Ratio: (119) / (113)	Abundances (Grouped): 113	Abundances (Grouped): 114	Abundances (Grouped): 115	Abundances (Grouped): 116	Abundances (Grouped): 117	Abundances (Grouped): 118	Abundances (Grouped): 119	Abundances (Grouped): 121	Quan Info	Found in Sample: [S98] F12: 114, Sample	Found in Sample: [S99] F12: 115, Sample	Found in Sample: [S100] F12: 116, Sample	Found in Sample: [S101] F12: 117, Sample	Found in Sample: [S102] F12: 118, Sample	Found in Sample: [S103] F12: 119, Sample	Found in Sample: [S104] F12: 121, Sample	Percolator PEP (by Search Engine): Sequest HT	XCorr (by Search Engine): Sequest HT	Sequence in Protein	Positions in Protein	Peptide Group Modifications in Protein	Quan Usage
FALSE	[-].SALLKVER.[V]		1	0.855509	1	1	3	c54715_g1	c54715_g1 [1-8]	1	957.573	0														No Quan Labels	Low	Low	Low	Low	Low	Low	Not Found	1	0.44	-.SALLKVER.V	[1-8]		Not Used
	Confidence	PSM Ambiguity	Annotated Sequence	Modifications	# Protein Groups	# Proteins	Master Protein Accessions	Protein Accessions	# Missed Cleavages	Charge	DeltaScore	DeltaCn	Rank	m/z [Da]	MH+ [Da]	Theo. MH+ [Da]	DeltaM [ppm]	Deltam/z [Da]	Activation Type	MS Order	Isolation Interference [%]	Average Reporter S/N	Ion Inject Time [ms]	RT [min]	First Scan	Spectrum File	Abundance: 113	Abundance: 114	Abundance: 115	Abundance: 116	Abundance: 117	Abundance: 118	Abundance: 119	XCorr	Percolator q-Value	Percolator PEP
	Low	Selected	[-].sALLKVER.[V]	N-Term(Prot)(Acetyl)	1	1	c54715_g1	c54715_g1	1	2	0.0227	0	1	479.289	957.571	957.573	-2.18	-0.00105	HCD (High Energy Collision Dissociation)	MS2	16.313	8.5	8.589	54.7407	13865	SHUTSA.raw	28.5	6.7	5.8	6.2	4.5	10.6	5.8	0.44	0.8974	1
	Low	Unambiguous	[-].sALLKVER.[V]	N-Term(Prot)(Acetyl)	1	1	c54715_g1	c54715_g1	1	2	0.1212	0	1	479.289	957.572	957.573	-1.16	-0.00056	HCD (High Energy Collision Dissociation)	MS2	15.3641	3.2	12.787	35.1093	8927	SHUTSA.raw	11.2		3.4		3	5.7	2.3	0.33	0.8974	1
	Low	Selected	[-].sALLKVER.[V]	N-Term(Prot)(Acetyl)	1	1	c54715_g1	c54715_g1	1	2	0	0	1	479.289	957.57	957.573	-3.08	-0.00147	HCD (High Energy Collision Dissociation)	MS2	21.0988	15	23.611	7.8938	1676	SHUTSA.raw	75.6	7.5	10.7	8.8	4	7.2	6.5	0.42	0.8974	1
High	c78549_g1	0.281	0	1	1	1	1	1	530	59.3	6.14	0	1														Low	Low	Low	Low	Low	Low	Low
Checked	Annotated Sequence	Modifications in Master Proteins	Qvality PEP	Qvality q-value	# Protein Groups	# Proteins	# PSMs	Master Protein Accessions	Positions in Master Proteins	# Missed Cleavages	Theo. MH+ [Da]	# Razor Quan Results	Abundance Ratio: (114) / (113)	Abundance Ratio: (116) / (113)	Abundance Ratio: (117) / (113)	Abundance Ratio: (118) / (113)	Abundance Ratio: (119) / (113)	Abundances (Grouped): 113	Abundances (Grouped): 114	Abundances (Grouped): 115	Abundances (Grouped): 116	Abundances (Grouped): 117	Abundances (Grouped): 118	Abundances (Grouped): 119	Abundances (Grouped): 121	Quan Info	Found in Sample: [S98] F12: 114, Sample	Found in Sample: [S99] F12: 115, Sample	Found in Sample: [S100] F12: 116, Sample	Found in Sample: [S101] F12: 117, Sample	Found in Sample: [S102] F12: 118, Sample	Found in Sample: [S103] F12: 119, Sample	Found in Sample: [S104] F12: 121, Sample	Percolator PEP (by Search Engine): Sequest HT	XCorr (by Search Engine): Sequest HT	Sequence in Protein	Positions in Protein	Peptide Group Modifications in Protein	Quan Usage
FALSE	[-].LEGECK.[M]		1	0.855853	1	1	1	c78549_g1	c78549_g1 [1-6]	0	735.334	0														No Quan Labels	Low	Low	Low	Low	Low	Low	Not Found	1	0.41	-.LEGECK.M	[1-6]		Not Used
	Confidence	PSM Ambiguity	Annotated Sequence	Modifications	# Protein Groups	# Proteins	Master Protein Accessions	Protein Accessions	# Missed Cleavages	Charge	DeltaScore	DeltaCn	Rank	m/z [Da]	MH+ [Da]	Theo. MH+ [Da]	DeltaM [ppm]	Deltam/z [Da]	Activation Type	MS Order	Isolation Interference [%]	Average Reporter S/N	Ion Inject Time [ms]	RT [min]	First Scan	Spectrum File	Abundance: 113	Abundance: 114	Abundance: 115	Abundance: 116	Abundance: 117	Abundance: 118	Abundance: 119	XCorr	Percolator q-Value	Percolator PEP
	Low	Unambiguous	[-].LEGEcK.[M]	C5(Carbamidomethyl)	1	1	c78549_g1	c78549_g1	0	2	0.1707	0	1	368.17	735.333	735.334	-2.09	-0.00077	HCD (High Energy Collision Dissociation)	MS2	27.0318	29.7	50	28.3783	7104	SHUTSA.raw	38.7	40.8	45.8	25.4	22	28.6	35.9	0.41	0.8974	1
High	c76684_g1	0.941	0	1	1	1	1	1	663	77.1	9.32	0	1														Low	Low	Low	Low	Low	Low	Low
Checked	Annotated Sequence	Modifications in Master Proteins	Qvality PEP	Qvality q-value	# Protein Groups	# Proteins	# PSMs	Master Protein Accessions	Positions in Master Proteins	# Missed Cleavages	Theo. MH+ [Da]	# Razor Quan Results	Abundance Ratio: (114) / (113)	Abundance Ratio: (116) / (113)	Abundance Ratio: (117) / (113)	Abundance Ratio: (118) / (113)	Abundance Ratio: (119) / (113)	Abundances (Grouped): 113	Abundances (Grouped): 114	Abundances (Grouped): 115	Abundances (Grouped): 116	Abundances (Grouped): 117	Abundances (Grouped): 118	Abundances (Grouped): 119	Abundances (Grouped): 121	Quan Info	Found in Sample: [S98] F12: 114, Sample	Found in Sample: [S99] F12: 115, Sample	Found in Sample: [S100] F12: 116, Sample	Found in Sample: [S101] F12: 117, Sample	Found in Sample: [S102] F12: 118, Sample	Found in Sample: [S103] F12: 119, Sample	Found in Sample: [S104] F12: 121, Sample	Percolator PEP (by Search Engine): Sequest HT	XCorr (by Search Engine): Sequest HT	Sequence in Protein	Positions in Protein	Peptide Group Modifications in Protein	Quan Usage
FALSE	[K].LNAATIMR.[E]		1	0.882781	1	1	1	c76684_g1	c76684_g1 [298-305]	0	905.487	0														No Quan Labels	Low	Low	Low	Low	Low	Low	Not Found	1	0.43	K.LNAATIMR.E	[298-305]		Not Used
	Confidence	PSM Ambiguity	Annotated Sequence	Modifications	# Protein Groups	# Proteins	Master Protein Accessions	Protein Accessions	# Missed Cleavages	Charge	DeltaScore	DeltaCn	Rank	m/z [Da]	MH+ [Da]	Theo. MH+ [Da]	DeltaM [ppm]	Deltam/z [Da]	Activation Type	MS Order	Isolation Interference [%]	Average Reporter S/N	Ion Inject Time [ms]	RT [min]	First Scan	Spectrum File	Abundance: 113	Abundance: 114	Abundance: 115	Abundance: 116	Abundance: 117	Abundance: 118	Abundance: 119	XCorr	Percolator q-Value	Percolator PEP
	Low	Unambiguous	[K].LNAATImR.[E]	M7(Oxidation)	1	1	c76684_g1	c76684_g1	0	2	0.093	0	1	453.244	905.48	905.487	-7.57	-0.00343	HCD (High Energy Collision Dissociation)	MS2	40.6094	28.8	23.31	39.4874	10094	SHUTSA.raw	25.3	19.9	19.4	27.2	105.9	20.4	12.4	0.43	0.9015	1
High	c67517_g2	0.762	0	18	1	2	1	1	55	6.5	4.94	0	1														Low	Low	Low	Low	Low	Low	Low
Checked	Annotated Sequence	Modifications in Master Proteins	Qvality PEP	Qvality q-value	# Protein Groups	# Proteins	# PSMs	Master Protein Accessions	Positions in Master Proteins	# Missed Cleavages	Theo. MH+ [Da]	# Razor Quan Results	Abundance Ratio: (114) / (113)	Abundance Ratio: (116) / (113)	Abundance Ratio: (117) / (113)	Abundance Ratio: (118) / (113)	Abundance Ratio: (119) / (113)	Abundances (Grouped): 113	Abundances (Grouped): 114	Abundances (Grouped): 115	Abundances (Grouped): 116	Abundances (Grouped): 117	Abundances (Grouped): 118	Abundances (Grouped): 119	Abundances (Grouped): 121	Quan Info	Found in Sample: [S98] F12: 114, Sample	Found in Sample: [S99] F12: 115, Sample	Found in Sample: [S100] F12: 116, Sample	Found in Sample: [S101] F12: 117, Sample	Found in Sample: [S102] F12: 118, Sample	Found in Sample: [S103] F12: 119, Sample	Found in Sample: [S104] F12: 121, Sample	Percolator PEP (by Search Engine): Sequest HT	XCorr (by Search Engine): Sequest HT	Sequence in Protein	Positions in Protein	Peptide Group Modifications in Protein	Quan Usage
FALSE	[K].YIKGVYDILR.[Y]		1	0.855853	1	2	2	c67517_g2	c67517_g2 [25-34]	1	1239.71	0														No Quan Labels	Low	Low	Low	Low	Low	Low	Not Found	1	0.65	K.YIKGVYDILR.Y	[25-34]		Not Used
	Confidence	PSM Ambiguity	Annotated Sequence	Modifications	# Protein Groups	# Proteins	Master Protein Accessions	Protein Accessions	# Missed Cleavages	Charge	DeltaScore	DeltaCn	Rank	m/z [Da]	MH+ [Da]	Theo. MH+ [Da]	DeltaM [ppm]	Deltam/z [Da]	Activation Type	MS Order	Isolation Interference [%]	Average Reporter S/N	Ion Inject Time [ms]	RT [min]	First Scan	Spectrum File	Abundance: 113	Abundance: 114	Abundance: 115	Abundance: 116	Abundance: 117	Abundance: 118	Abundance: 119	XCorr	Percolator q-Value	Percolator PEP
	Low	Unambiguous	[K].YIKGVYDILR.[Y]		1	2	c67517_g2	c67517_g1; c67517_g2	1	2	0.2615	0	1	620.363	1239.72	1239.71	8.12	0.00503	HCD (High Energy Collision Dissociation)	MS2	30.3865	3.4	50	72.3547	18308	SHUTSA.raw	5.9	3.4	6	4.9	3	3.8		0.65	0.8974	1
	Low	Rejected	[K].YIKGVYDILR.[Y]		1	2	c67517_g2	c67517_g1; c67517_g2	1	2		0.0213	2	620.364	1239.72	1239.71	9.4	0.00583	HCD (High Energy Collision Dissociation)	MS2	0	11.6	50	66.9584	16677	SHUTSA.raw	18	13.9	14.3	9.8	8.7	14.4	13.7	0.46	0.8974	1
High	c80713_g3	0.168	0	1	1	1	1	1	976	111.8	8.27	0	1														Low	Low	Low	Not Found	Not Found	Low	Low
Checked	Annotated Sequence	Modifications in Master Proteins	Qvality PEP	Qvality q-value	# Protein Groups	# Proteins	# PSMs	Master Protein Accessions	Positions in Master Proteins	# Missed Cleavages	Theo. MH+ [Da]	# Razor Quan Results	Abundance Ratio: (114) / (113)	Abundance Ratio: (116) / (113)	Abundance Ratio: (117) / (113)	Abundance Ratio: (118) / (113)	Abundance Ratio: (119) / (113)	Abundances (Grouped): 113	Abundances (Grouped): 114	Abundances (Grouped): 115	Abundances (Grouped): 116	Abundances (Grouped): 117	Abundances (Grouped): 118	Abundances (Grouped): 119	Abundances (Grouped): 121	Quan Info	Found in Sample: [S98] F12: 114, Sample	Found in Sample: [S99] F12: 115, Sample	Found in Sample: [S100] F12: 116, Sample	Found in Sample: [S101] F12: 117, Sample	Found in Sample: [S102] F12: 118, Sample	Found in Sample: [S103] F12: 119, Sample	Found in Sample: [S104] F12: 121, Sample	Percolator PEP (by Search Engine): Sequest HT	XCorr (by Search Engine): Sequest HT	Sequence in Protein	Positions in Protein	Peptide Group Modifications in Protein	Quan Usage
FALSE	[K].KWIKLLK.[A]		1	0.926357	1	1	1	c80713_g3	c80713_g3 [119-125]	2	1537.04	0														No Quan Values	Low	Low	Not Found	Not Found	Low	Low	Not Found	1	0.12	K.KWIKLLK.A	[119-125]		Not Used
	Confidence	PSM Ambiguity	Annotated Sequence	Modifications	# Protein Groups	# Proteins	Master Protein Accessions	Protein Accessions	# Missed Cleavages	Charge	DeltaScore	DeltaCn	Rank	m/z [Da]	MH+ [Da]	Theo. MH+ [Da]	DeltaM [ppm]	Deltam/z [Da]	Activation Type	MS Order	Isolation Interference [%]	Average Reporter S/N	Ion Inject Time [ms]	RT [min]	First Scan	Spectrum File	Abundance: 113	Abundance: 114	Abundance: 115	Abundance: 116	Abundance: 117	Abundance: 118	Abundance: 119	XCorr	Percolator q-Value	Percolator PEP
	Low	Unambiguous	[K].KWIkLLk.[A]	K4(iTRAQ8plex); K7(iTRAQ8plex)	1	1	c80713_g3	c80713_g3	2	3	0.0833	0	1	513.022	1537.05	1537.04	5	0.00256	HCD (High Energy Collision Dissociation)	MS2	29.5317	2.5	50	74.6303	18974	SHUTSA.raw	6.8	2	6.8			2.2	2.2	0.12	0.9307	1
High	c30207_g1	0.17	0	2	1	1	1	1	512	56.7	6.2	0	1														Low	Low	Low	Low	Low	Low	Low
Checked	Annotated Sequence	Modifications in Master Proteins	Qvality PEP	Qvality q-value	# Protein Groups	# Proteins	# PSMs	Master Protein Accessions	Positions in Master Proteins	# Missed Cleavages	Theo. MH+ [Da]	# Razor Quan Results	Abundance Ratio: (114) / (113)	Abundance Ratio: (116) / (113)	Abundance Ratio: (117) / (113)	Abundance Ratio: (118) / (113)	Abundance Ratio: (119) / (113)	Abundances (Grouped): 113	Abundances (Grouped): 114	Abundances (Grouped): 115	Abundances (Grouped): 116	Abundances (Grouped): 117	Abundances (Grouped): 118	Abundances (Grouped): 119	Abundances (Grouped): 121	Quan Info	Found in Sample: [S98] F12: 114, Sample	Found in Sample: [S99] F12: 115, Sample	Found in Sample: [S100] F12: 116, Sample	Found in Sample: [S101] F12: 117, Sample	Found in Sample: [S102] F12: 118, Sample	Found in Sample: [S103] F12: 119, Sample	Found in Sample: [S104] F12: 121, Sample	Percolator PEP (by Search Engine): Sequest HT	XCorr (by Search Engine): Sequest HT	Sequence in Protein	Positions in Protein	Peptide Group Modifications in Protein	Quan Usage
FALSE	[K].LQVPIAAAVR.[N]		1	0.921339	1	1	1	c30207_g1	c30207_g1 [420-429]	0	1037.65	0														No Quan Labels	Low	Low	Low	Low	Low	Low	Not Found	1	0.88	K.LQVPIAAAVR.N	[420-429]		Not Used
	Confidence	PSM Ambiguity	Annotated Sequence	Modifications	# Protein Groups	# Proteins	Master Protein Accessions	Protein Accessions	# Missed Cleavages	Charge	DeltaScore	DeltaCn	Rank	m/z [Da]	MH+ [Da]	Theo. MH+ [Da]	DeltaM [ppm]	Deltam/z [Da]	Activation Type	MS Order	Isolation Interference [%]	Average Reporter S/N	Ion Inject Time [ms]	RT [min]	First Scan	Spectrum File	Abundance: 113	Abundance: 114	Abundance: 115	Abundance: 116	Abundance: 117	Abundance: 118	Abundance: 119	XCorr	Percolator q-Value	Percolator PEP
	Low	Unambiguous	[K].LQVPIAAAVR.[N]		1	1	c30207_g1	c30207_g1	0	2	0.1818	0	1	519.329	1037.65	1037.65	3.24	0.00168	HCD (High Energy Collision Dissociation)	MS2	53.1277	37	50	5.3603	1078	SHUTSA.raw	70.6	40.4	54.4	40.3	23.6	39.3	27.8	0.88	0.9187	1
High	c80612_g3	0.193	0	4	1	1	1	1	232	26.3	5.64	0	1														Low	Low	Low	Low	Low	Low	Low
Checked	Annotated Sequence	Modifications in Master Proteins	Qvality PEP	Qvality q-value	# Protein Groups	# Proteins	# PSMs	Master Protein Accessions	Positions in Master Proteins	# Missed Cleavages	Theo. MH+ [Da]	# Razor Quan Results	Abundance Ratio: (114) / (113)	Abundance Ratio: (116) / (113)	Abundance Ratio: (117) / (113)	Abundance Ratio: (118) / (113)	Abundance Ratio: (119) / (113)	Abundances (Grouped): 113	Abundances (Grouped): 114	Abundances (Grouped): 115	Abundances (Grouped): 116	Abundances (Grouped): 117	Abundances (Grouped): 118	Abundances (Grouped): 119	Abundances (Grouped): 121	Quan Info	Found in Sample: [S98] F12: 114, Sample	Found in Sample: [S99] F12: 115, Sample	Found in Sample: [S100] F12: 116, Sample	Found in Sample: [S101] F12: 117, Sample	Found in Sample: [S102] F12: 118, Sample	Found in Sample: [S103] F12: 119, Sample	Found in Sample: [S104] F12: 121, Sample	Percolator PEP (by Search Engine): Sequest HT	XCorr (by Search Engine): Sequest HT	Sequence in Protein	Positions in Protein	Peptide Group Modifications in Protein	Quan Usage
FALSE	[K].LALKHLVHK.[R]		1	0.873348	1	1	1	c80612_g3	c80612_g3 [192-200]	1	1058.68	0														No Quan Labels	Low	Low	Low	Low	Low	Low	Not Found	1	0.39	K.LALKHLVHK.R	[192-200]		Not Used
	Confidence	PSM Ambiguity	Annotated Sequence	Modifications	# Protein Groups	# Proteins	Master Protein Accessions	Protein Accessions	# Missed Cleavages	Charge	DeltaScore	DeltaCn	Rank	m/z [Da]	MH+ [Da]	Theo. MH+ [Da]	DeltaM [ppm]	Deltam/z [Da]	Activation Type	MS Order	Isolation Interference [%]	Average Reporter S/N	Ion Inject Time [ms]	RT [min]	First Scan	Spectrum File	Abundance: 113	Abundance: 114	Abundance: 115	Abundance: 116	Abundance: 117	Abundance: 118	Abundance: 119	XCorr	Percolator q-Value	Percolator PEP
	Low	Unambiguous	[K].LALKHLVHK.[R]		1	1	c80612_g3	c80612_g3	1	2	0.1282	0	1	529.85	1058.69	1058.68	8.38	0.00444	HCD (High Energy Collision Dissociation)	MS2		23.2	50	21.516	4980	SHUTSA.raw	105.7	18.8	21.3	11.5	6.4	10.5	11.7	0.39	0.8974	1
High	c43960_g1	0.195	0	6	1	1	1	1	563	64.1	6.54	0	1														Low	Low	Low	Low	Low	Low	Low
Checked	Annotated Sequence	Modifications in Master Proteins	Qvality PEP	Qvality q-value	# Protein Groups	# Proteins	# PSMs	Master Protein Accessions	Positions in Master Proteins	# Missed Cleavages	Theo. MH+ [Da]	# Razor Quan Results	Abundance Ratio: (114) / (113)	Abundance Ratio: (116) / (113)	Abundance Ratio: (117) / (113)	Abundance Ratio: (118) / (113)	Abundance Ratio: (119) / (113)	Abundances (Grouped): 113	Abundances (Grouped): 114	Abundances (Grouped): 115	Abundances (Grouped): 116	Abundances (Grouped): 117	Abundances (Grouped): 118	Abundances (Grouped): 119	Abundances (Grouped): 121	Quan Info	Found in Sample: [S98] F12: 114, Sample	Found in Sample: [S99] F12: 115, Sample	Found in Sample: [S100] F12: 116, Sample	Found in Sample: [S101] F12: 117, Sample	Found in Sample: [S102] F12: 118, Sample	Found in Sample: [S103] F12: 119, Sample	Found in Sample: [S104] F12: 121, Sample	Percolator PEP (by Search Engine): Sequest HT	XCorr (by Search Engine): Sequest HT	Sequence in Protein	Positions in Protein	Peptide Group Modifications in Protein	Quan Usage
FALSE	[K].LAGSEVQFMLDYLGFPDSQDDVDKLLKVLDSDK.[D]		1	0.939969	1	1	1	c43960_g1	c43960_g1 [131-163]	2	4005.04	0														No Quan Values	Low	Low	Low	Low	Low	Low	Not Found	1	0.43	K.LAGSEVQFMLDYLGFPDSQDDVDKLLKVLDSDK.D	[131-163]		Not Used
	Confidence	PSM Ambiguity	Annotated Sequence	Modifications	# Protein Groups	# Proteins	Master Protein Accessions	Protein Accessions	# Missed Cleavages	Charge	DeltaScore	DeltaCn	Rank	m/z [Da]	MH+ [Da]	Theo. MH+ [Da]	DeltaM [ppm]	Deltam/z [Da]	Activation Type	MS Order	Isolation Interference [%]	Average Reporter S/N	Ion Inject Time [ms]	RT [min]	First Scan	Spectrum File	Abundance: 113	Abundance: 114	Abundance: 115	Abundance: 116	Abundance: 117	Abundance: 118	Abundance: 119	XCorr	Percolator q-Value	Percolator PEP
	Low	Unambiguous	[K].lAGSEVQFMLDYLGFPDSQDDVDKLLKVLDSDK.[D]	N-Term(iTRAQ8plex)	1	1	c43960_g1	c43960_g1	2	3	0.2558	0	1	1335.68	4005.03	4005.04	-0.21	-0.00028	HCD (High Energy Collision Dissociation)	MS2	37.7836	4.2	50	70.2629	17655	SHUTSA.raw	5.5	2.6	4.6	4.8	3.5	6.9	6	0.43	0.9525	1
High	c33508_g2	0.198	0	8	1	4	1	1	75	8.8	8.75	0	1														Low	Low	Low	Low	Low	Low	Low
Checked	Annotated Sequence	Modifications in Master Proteins	Qvality PEP	Qvality q-value	# Protein Groups	# Proteins	# PSMs	Master Protein Accessions	Positions in Master Proteins	# Missed Cleavages	Theo. MH+ [Da]	# Razor Quan Results	Abundance Ratio: (114) / (113)	Abundance Ratio: (116) / (113)	Abundance Ratio: (117) / (113)	Abundance Ratio: (118) / (113)	Abundance Ratio: (119) / (113)	Abundances (Grouped): 113	Abundances (Grouped): 114	Abundances (Grouped): 115	Abundances (Grouped): 116	Abundances (Grouped): 117	Abundances (Grouped): 118	Abundances (Grouped): 119	Abundances (Grouped): 121	Quan Info	Found in Sample: [S98] F12: 114, Sample	Found in Sample: [S99] F12: 115, Sample	Found in Sample: [S100] F12: 116, Sample	Found in Sample: [S101] F12: 117, Sample	Found in Sample: [S102] F12: 118, Sample	Found in Sample: [S103] F12: 119, Sample	Found in Sample: [S104] F12: 121, Sample	Percolator PEP (by Search Engine): Sequest HT	XCorr (by Search Engine): Sequest HT	Sequence in Protein	Positions in Protein	Peptide Group Modifications in Protein	Quan Usage
FALSE	[K].IWEKVR.[-]		1	0.923095	1	1	4	c33508_g2	c33508_g2 [70-75]	1	830.488	0														No Quan Labels	Low	Low	Low	Low	Low	Low	Not Found	1	1	K.IWEKVR.-	[70-75]		Not Used
	Confidence	PSM Ambiguity	Annotated Sequence	Modifications	# Protein Groups	# Proteins	Master Protein Accessions	Protein Accessions	# Missed Cleavages	Charge	DeltaScore	DeltaCn	Rank	m/z [Da]	MH+ [Da]	Theo. MH+ [Da]	DeltaM [ppm]	Deltam/z [Da]	Activation Type	MS Order	Isolation Interference [%]	Average Reporter S/N	Ion Inject Time [ms]	RT [min]	First Scan	Spectrum File	Abundance: 113	Abundance: 114	Abundance: 115	Abundance: 116	Abundance: 117	Abundance: 118	Abundance: 119	XCorr	Percolator q-Value	Percolator PEP
	Low	Rejected	[K].IWEKVR.[-]		1	1	c33508_g2	c33508_g2	1	2		0.0291	3	415.745	830.483	830.488	-5.92	-0.00246	HCD (High Energy Collision Dissociation)	MS2	29.6295	14.9	50	21.5804	5004	SHUTSA.raw	24.5	17.4	23.9	14.4	7.9	18.8	12.4	1	0.9291	1
	Low	Selected	[K].IWEKVR.[-]		1	1	c33508_g2	c33508_g2	1	2	0	0	1	415.744	830.482	830.488	-7.97	-0.00331	HCD (High Energy Collision Dissociation)	MS2	40.7235	16.6	50	20.3662	4580	SHUTSA.raw	30.7	20.1	23.3	11.9	12.5	17.4	16.6	0.9	0.9301	1
	Low	Rejected	[K].IWEKVR.[-]		1	1	c33508_g2	c33508_g2	1	2		0.0333	3	415.745	830.482	830.488	-7.17	-0.00298	HCD (High Energy Collision Dissociation)	MS2	0	13.9	50	21.2322	4870	SHUTSA.raw	24.5	16.9	23.5	10.2	7.6	16.4	12.2	0.87	0.9301	1
	Low	Unambiguous	[K].IWEKVR.[-]		1	1	c33508_g2	c33508_g2	1	2	0.0909	0	1	415.745	830.483	830.488	-6.36	-0.00264	HCD (High Energy Collision Dissociation)	MS2	29.1674	13.2	50	20.6886	4679	SHUTSA.raw	25.3	15.6	15.7	12.8	7.9	12.6	15.5	0.88	0.9301	1
High	c26161_g1	0.203	0	2	1	2	1	1	520	57.8	5.67	0	1														Low	Low	Low	Low	Low	Low	Low
Checked	Annotated Sequence	Modifications in Master Proteins	Qvality PEP	Qvality q-value	# Protein Groups	# Proteins	# PSMs	Master Protein Accessions	Positions in Master Proteins	# Missed Cleavages	Theo. MH+ [Da]	# Razor Quan Results	Abundance Ratio: (114) / (113)	Abundance Ratio: (116) / (113)	Abundance Ratio: (117) / (113)	Abundance Ratio: (118) / (113)	Abundance Ratio: (119) / (113)	Abundances (Grouped): 113	Abundances (Grouped): 114	Abundances (Grouped): 115	Abundances (Grouped): 116	Abundances (Grouped): 117	Abundances (Grouped): 118	Abundances (Grouped): 119	Abundances (Grouped): 121	Quan Info	Found in Sample: [S98] F12: 114, Sample	Found in Sample: [S99] F12: 115, Sample	Found in Sample: [S100] F12: 116, Sample	Found in Sample: [S101] F12: 117, Sample	Found in Sample: [S102] F12: 118, Sample	Found in Sample: [S103] F12: 119, Sample	Found in Sample: [S104] F12: 121, Sample	Percolator PEP (by Search Engine): Sequest HT	XCorr (by Search Engine): Sequest HT	Sequence in Protein	Positions in Protein	Peptide Group Modifications in Protein	Quan Usage
FALSE	[K].SKTLGRPAQK.[K]		1	0.926357	1	1	2	c26161_g1	c26161_g1 [293-302]	1	1085.64	0														No Quan Labels	Low	Low	Low	Low	Low	Low	Not Found	1	1.28	K.SKTLGRPAQK.K	[293-302]		Not Used
	Confidence	PSM Ambiguity	Annotated Sequence	Modifications	# Protein Groups	# Proteins	Master Protein Accessions	Protein Accessions	# Missed Cleavages	Charge	DeltaScore	DeltaCn	Rank	m/z [Da]	MH+ [Da]	Theo. MH+ [Da]	DeltaM [ppm]	Deltam/z [Da]	Activation Type	MS Order	Isolation Interference [%]	Average Reporter S/N	Ion Inject Time [ms]	RT [min]	First Scan	Spectrum File	Abundance: 113	Abundance: 114	Abundance: 115	Abundance: 116	Abundance: 117	Abundance: 118	Abundance: 119	XCorr	Percolator q-Value	Percolator PEP
	Low	Unambiguous	[K].SKTLGRPAQK.[K]		1	1	c26161_g1	c26161_g1	1	3	0.1406	0	1	362.555	1085.65	1085.64	6.06	0.00219	HCD (High Energy Collision Dissociation)	MS2	52.576	10.3	11.39	23.3775	5666	SHUTSA.raw	19.1	10.1	15	7.6	6.9	14.6	9.3	1.28	0.9301	1
	Low	Unambiguous	[K].SKTLGRPAQK.[K]		1	1	c26161_g1	c26161_g1	1	3	0.0902	0	1	362.555	1085.65	1085.64	6.39	0.00231	HCD (High Energy Collision Dissociation)	MS2	45.8007	31.2	50	23.556	5732	SHUTSA.raw	48.4	41.1	44.1	28	18.2	33.7	35.8	1.22	0.9301	1
High	c120779_g1	0.213	0	8	1	2	1	1	117	13.3	10.24	0	1														Low	Low	Low	Low	Low	Low	Low
Checked	Annotated Sequence	Modifications in Master Proteins	Qvality PEP	Qvality q-value	# Protein Groups	# Proteins	# PSMs	Master Protein Accessions	Positions in Master Proteins	# Missed Cleavages	Theo. MH+ [Da]	# Razor Quan Results	Abundance Ratio: (114) / (113)	Abundance Ratio: (116) / (113)	Abundance Ratio: (117) / (113)	Abundance Ratio: (118) / (113)	Abundance Ratio: (119) / (113)	Abundances (Grouped): 113	Abundances (Grouped): 114	Abundances (Grouped): 115	Abundances (Grouped): 116	Abundances (Grouped): 117	Abundances (Grouped): 118	Abundances (Grouped): 119	Abundances (Grouped): 121	Quan Info	Found in Sample: [S98] F12: 114, Sample	Found in Sample: [S99] F12: 115, Sample	Found in Sample: [S100] F12: 116, Sample	Found in Sample: [S101] F12: 117, Sample	Found in Sample: [S102] F12: 118, Sample	Found in Sample: [S103] F12: 119, Sample	Found in Sample: [S104] F12: 121, Sample	Percolator PEP (by Search Engine): Sequest HT	XCorr (by Search Engine): Sequest HT	Sequence in Protein	Positions in Protein	Peptide Group Modifications in Protein	Quan Usage
FALSE	[K].VYASIYQPK.[A]		1	0.926357	1	1	2	c120779_g1	c120779_g1 [21-29]	0	1068.57	0														No Quan Labels	Low	Low	Low	Low	Low	Low	Not Found	1	0.66	K.VYASIYQPK.A	[21-29]		Not Used
	Confidence	PSM Ambiguity	Annotated Sequence	Modifications	# Protein Groups	# Proteins	Master Protein Accessions	Protein Accessions	# Missed Cleavages	Charge	DeltaScore	DeltaCn	Rank	m/z [Da]	MH+ [Da]	Theo. MH+ [Da]	DeltaM [ppm]	Deltam/z [Da]	Activation Type	MS Order	Isolation Interference [%]	Average Reporter S/N	Ion Inject Time [ms]	RT [min]	First Scan	Spectrum File	Abundance: 113	Abundance: 114	Abundance: 115	Abundance: 116	Abundance: 117	Abundance: 118	Abundance: 119	XCorr	Percolator q-Value	Percolator PEP
	Low	Unambiguous	[K].VYASIYQPK.[A]		1	1	c120779_g1	c120779_g1	0	2	0.2576	0	1	534.785	1068.56	1068.57	-8.78	-0.00469	HCD (High Energy Collision Dissociation)	MS2	0	11.2	50	47.3413	12047	SHUTSA.raw	26.9	11.1	16.9	14.7	6.3	7.9	6.2	0.66	0.9307	1
	Low	Unambiguous	[K].VYASIYQPK.[A]		1	1	c120779_g1	c120779_g1	0	2	0.1698	0	1	534.786	1068.57	1068.57	-6.73	-0.00359	HCD (High Energy Collision Dissociation)	MS2	0	9.4	50	59.2624	14932	SHUTSA.raw	29	5	12.5	11.9	6	6	4.7	0.53	0.9515	1
High	c38528_g1	0.216	0	2	1	1	1	1	415	46.1	6.55	0	1														Low	Low	Low	Low	Low	Low	Low
Checked	Annotated Sequence	Modifications in Master Proteins	Qvality PEP	Qvality q-value	# Protein Groups	# Proteins	# PSMs	Master Protein Accessions	Positions in Master Proteins	# Missed Cleavages	Theo. MH+ [Da]	# Razor Quan Results	Abundance Ratio: (114) / (113)	Abundance Ratio: (116) / (113)	Abundance Ratio: (117) / (113)	Abundance Ratio: (118) / (113)	Abundance Ratio: (119) / (113)	Abundances (Grouped): 113	Abundances (Grouped): 114	Abundances (Grouped): 115	Abundances (Grouped): 116	Abundances (Grouped): 117	Abundances (Grouped): 118	Abundances (Grouped): 119	Abundances (Grouped): 121	Quan Info	Found in Sample: [S98] F12: 114, Sample	Found in Sample: [S99] F12: 115, Sample	Found in Sample: [S100] F12: 116, Sample	Found in Sample: [S101] F12: 117, Sample	Found in Sample: [S102] F12: 118, Sample	Found in Sample: [S103] F12: 119, Sample	Found in Sample: [S104] F12: 121, Sample	Percolator PEP (by Search Engine): Sequest HT	XCorr (by Search Engine): Sequest HT	Sequence in Protein	Positions in Protein	Peptide Group Modifications in Protein	Quan Usage
FALSE	[K].FVYEKGK.[I]		1	0.882781	1	1	1	c38528_g1	c38528_g1 [64-70]	1	870.472	0														No Quan Labels	Low	Low	Low	Low	Low	Low	Not Found	1	0.42	K.FVYEKGK.I	[64-70]		Not Used
	Confidence	PSM Ambiguity	Annotated Sequence	Modifications	# Protein Groups	# Proteins	Master Protein Accessions	Protein Accessions	# Missed Cleavages	Charge	DeltaScore	DeltaCn	Rank	m/z [Da]	MH+ [Da]	Theo. MH+ [Da]	DeltaM [ppm]	Deltam/z [Da]	Activation Type	MS Order	Isolation Interference [%]	Average Reporter S/N	Ion Inject Time [ms]	RT [min]	First Scan	Spectrum File	Abundance: 113	Abundance: 114	Abundance: 115	Abundance: 116	Abundance: 117	Abundance: 118	Abundance: 119	XCorr	Percolator q-Value	Percolator PEP
	Low	Unambiguous	[K].FVYEKGK.[I]		1	1	c38528_g1	c38528_g1	1	2	0.1905	0	1	435.738	870.469	870.472	-2.95	-0.00129	HCD (High Energy Collision Dissociation)	MS2	0	89.1	50	52.0503	13239	SHUTSA.raw	111.3	88.4	116.5	98	89.5	100.4	108.8	0.42	0.9015	1
High	c35655_g1	0.222	0	1	1	1	1	1	494	54.2	6.64	0	1														Low	Low	Low	Low	Low	Low	Low
Checked	Annotated Sequence	Modifications in Master Proteins	Qvality PEP	Qvality q-value	# Protein Groups	# Proteins	# PSMs	Master Protein Accessions	Positions in Master Proteins	# Missed Cleavages	Theo. MH+ [Da]	# Razor Quan Results	Abundance Ratio: (114) / (113)	Abundance Ratio: (116) / (113)	Abundance Ratio: (117) / (113)	Abundance Ratio: (118) / (113)	Abundance Ratio: (119) / (113)	Abundances (Grouped): 113	Abundances (Grouped): 114	Abundances (Grouped): 115	Abundances (Grouped): 116	Abundances (Grouped): 117	Abundances (Grouped): 118	Abundances (Grouped): 119	Abundances (Grouped): 121	Quan Info	Found in Sample: [S98] F12: 114, Sample	Found in Sample: [S99] F12: 115, Sample	Found in Sample: [S100] F12: 116, Sample	Found in Sample: [S101] F12: 117, Sample	Found in Sample: [S102] F12: 118, Sample	Found in Sample: [S103] F12: 119, Sample	Found in Sample: [S104] F12: 121, Sample	Percolator PEP (by Search Engine): Sequest HT	XCorr (by Search Engine): Sequest HT	Sequence in Protein	Positions in Protein	Peptide Group Modifications in Protein	Quan Usage
FALSE	[R].LHQAAVR.[A]		1	0.882781	1	1	1	c35655_g1	c35655_g1 [449-455]	0	794.463	0														No Quan Labels	Low	Low	Low	Low	Low	Low	Not Found	1	0.62	R.LHQAAVR.A	[449-455]		Not Used
	Confidence	PSM Ambiguity	Annotated Sequence	Modifications	# Protein Groups	# Proteins	Master Protein Accessions	Protein Accessions	# Missed Cleavages	Charge	DeltaScore	DeltaCn	Rank	m/z [Da]	MH+ [Da]	Theo. MH+ [Da]	DeltaM [ppm]	Deltam/z [Da]	Activation Type	MS Order	Isolation Interference [%]	Average Reporter S/N	Ion Inject Time [ms]	RT [min]	First Scan	Spectrum File	Abundance: 113	Abundance: 114	Abundance: 115	Abundance: 116	Abundance: 117	Abundance: 118	Abundance: 119	XCorr	Percolator q-Value	Percolator PEP
	Low	Unambiguous	[R].LHQAAVR.[A]		1	1	c35655_g1	c35655_g1	0	2	0.0645	0	1	397.736	794.466	794.463	3.12	0.00124	HCD (High Energy Collision Dissociation)	MS2	71.6926	88.4	48.128	22.6194	5351	SHUTSA.raw	85.7	92.1	118.7	124.9	101.3	92.6	91.7	0.62	0.8974	1
High	c42256_g1	0.229	0	2	1	2	1	1	693	75.7	6.54	0	1														Low	Low	Low	Low	Low	Low	Low
Checked	Annotated Sequence	Modifications in Master Proteins	Qvality PEP	Qvality q-value	# Protein Groups	# Proteins	# PSMs	Master Protein Accessions	Positions in Master Proteins	# Missed Cleavages	Theo. MH+ [Da]	# Razor Quan Results	Abundance Ratio: (114) / (113)	Abundance Ratio: (116) / (113)	Abundance Ratio: (117) / (113)	Abundance Ratio: (118) / (113)	Abundance Ratio: (119) / (113)	Abundances (Grouped): 113	Abundances (Grouped): 114	Abundances (Grouped): 115	Abundances (Grouped): 116	Abundances (Grouped): 117	Abundances (Grouped): 118	Abundances (Grouped): 119	Abundances (Grouped): 121	Quan Info	Found in Sample: [S98] F12: 114, Sample	Found in Sample: [S99] F12: 115, Sample	Found in Sample: [S100] F12: 116, Sample	Found in Sample: [S101] F12: 117, Sample	Found in Sample: [S102] F12: 118, Sample	Found in Sample: [S103] F12: 119, Sample	Found in Sample: [S104] F12: 121, Sample	Percolator PEP (by Search Engine): Sequest HT	XCorr (by Search Engine): Sequest HT	Sequence in Protein	Positions in Protein	Peptide Group Modifications in Protein	Quan Usage
FALSE	[R].LRGRFSITPSR.[S]		1	0.926357	1	1	2	c42256_g1	c42256_g1 [43-53]	2	1289.74	0														No Quan Labels	Low	Low	Low	Low	Low	Low	Not Found	1	0.82	R.LRGRFSITPSR.S	[43-53]		Not Used
	Confidence	PSM Ambiguity	Annotated Sequence	Modifications	# Protein Groups	# Proteins	Master Protein Accessions	Protein Accessions	# Missed Cleavages	Charge	DeltaScore	DeltaCn	Rank	m/z [Da]	MH+ [Da]	Theo. MH+ [Da]	DeltaM [ppm]	Deltam/z [Da]	Activation Type	MS Order	Isolation Interference [%]	Average Reporter S/N	Ion Inject Time [ms]	RT [min]	First Scan	Spectrum File	Abundance: 113	Abundance: 114	Abundance: 115	Abundance: 116	Abundance: 117	Abundance: 118	Abundance: 119	XCorr	Percolator q-Value	Percolator PEP
	Low	Rejected	[R].LRGRFSITPSR.[S]		1	1	c42256_g1	c42256_g1	2	3		0.012	2	430.582	1289.73	1289.74	-8.91	-0.00383	HCD (High Energy Collision Dissociation)	MS2	30.9774	6.3	50	45.2623	11554	SHUTSA.raw	11	5.8	9.8	5.4	5.4	6.9	6.1	0.82	0.9301	1
	Low	Unambiguous	[R].LRGRFSITPSR.[S]		1	1	c42256_g1	c42256_g1	2	3	0.1148	0	1	430.584	1289.74	1289.74	-3.87	-0.00167	HCD (High Energy Collision Dissociation)	MS2		7.2	50	7.5006	1583	SHUTSA.raw	14.1	9.5	12.4	5.5	3.4	6.9	5.6	0.61	0.9525	1
High	c60078_g1	0.232	0	2	1	2	1	1	376	42.7	9.64	0	1														Low	Low	Low	Low	Low	Low	Low
Checked	Annotated Sequence	Modifications in Master Proteins	Qvality PEP	Qvality q-value	# Protein Groups	# Proteins	# PSMs	Master Protein Accessions	Positions in Master Proteins	# Missed Cleavages	Theo. MH+ [Da]	# Razor Quan Results	Abundance Ratio: (114) / (113)	Abundance Ratio: (116) / (113)	Abundance Ratio: (117) / (113)	Abundance Ratio: (118) / (113)	Abundance Ratio: (119) / (113)	Abundances (Grouped): 113	Abundances (Grouped): 114	Abundances (Grouped): 115	Abundances (Grouped): 116	Abundances (Grouped): 117	Abundances (Grouped): 118	Abundances (Grouped): 119	Abundances (Grouped): 121	Quan Info	Found in Sample: [S98] F12: 114, Sample	Found in Sample: [S99] F12: 115, Sample	Found in Sample: [S100] F12: 116, Sample	Found in Sample: [S101] F12: 117, Sample	Found in Sample: [S102] F12: 118, Sample	Found in Sample: [S103] F12: 119, Sample	Found in Sample: [S104] F12: 121, Sample	Percolator PEP (by Search Engine): Sequest HT	XCorr (by Search Engine): Sequest HT	Sequence in Protein	Positions in Protein	Peptide Group Modifications in Protein	Quan Usage
FALSE	[R].HKLFVKFR.[D]		1	0.896548	1	1	2	c60078_g1	c60078_g1 [278-285]	2	1074.66	0														No Quan Labels	Low	Low	Low	Low	Low	Low	Not Found	1	1.04	R.HKLFVKFR.D	[278-285]		Not Used
	Confidence	PSM Ambiguity	Annotated Sequence	Modifications	# Protein Groups	# Proteins	Master Protein Accessions	Protein Accessions	# Missed Cleavages	Charge	DeltaScore	DeltaCn	Rank	m/z [Da]	MH+ [Da]	Theo. MH+ [Da]	DeltaM [ppm]	Deltam/z [Da]	Activation Type	MS Order	Isolation Interference [%]	Average Reporter S/N	Ion Inject Time [ms]	RT [min]	First Scan	Spectrum File	Abundance: 113	Abundance: 114	Abundance: 115	Abundance: 116	Abundance: 117	Abundance: 118	Abundance: 119	XCorr	Percolator q-Value	Percolator PEP
	Low	Unambiguous	[R].HKLFVKFR.[D]		1	1	c60078_g1	c60078_g1	2	2	0.125	0	1	537.833	1074.66	1074.66	2.44	0.00131	HCD (High Energy Collision Dissociation)	MS2	48.9172	24.2	50	22.3513	5260	SHUTSA.raw	29.4	17.8	28.6	18.1	47.3	36.6	15.5	1.04	0.9039	1
	Low	Unambiguous	[R].HKLFVKFR.[D]		1	1	c60078_g1	c60078_g1	2	2	0.3592	0	1	537.837	1074.67	1074.66	8.8	0.00473	HCD (High Energy Collision Dissociation)	MS2	66.324	20.8	50	21.8634	5109	SHUTSA.raw	18.4	17	19.7	15.4	61.9	23	10.8	1.03	0.9106	1
High	c192190_g1	0.235	0	5	1	2	1	1	155	17.6	8.22	0	1														Low	Low	Low	Low	Low	Low	Low
Checked	Annotated Sequence	Modifications in Master Proteins	Qvality PEP	Qvality q-value	# Protein Groups	# Proteins	# PSMs	Master Protein Accessions	Positions in Master Proteins	# Missed Cleavages	Theo. MH+ [Da]	# Razor Quan Results	Abundance Ratio: (114) / (113)	Abundance Ratio: (116) / (113)	Abundance Ratio: (117) / (113)	Abundance Ratio: (118) / (113)	Abundance Ratio: (119) / (113)	Abundances (Grouped): 113	Abundances (Grouped): 114	Abundances (Grouped): 115	Abundances (Grouped): 116	Abundances (Grouped): 117	Abundances (Grouped): 118	Abundances (Grouped): 119	Abundances (Grouped): 121	Quan Info	Found in Sample: [S98] F12: 114, Sample	Found in Sample: [S99] F12: 115, Sample	Found in Sample: [S100] F12: 116, Sample	Found in Sample: [S101] F12: 117, Sample	Found in Sample: [S102] F12: 118, Sample	Found in Sample: [S103] F12: 119, Sample	Found in Sample: [S104] F12: 121, Sample	Percolator PEP (by Search Engine): Sequest HT	XCorr (by Search Engine): Sequest HT	Sequence in Protein	Positions in Protein	Peptide Group Modifications in Protein	Quan Usage
FALSE	[K].IKDVSADK.[E]		1	0.867617	1	1	2	c192190_g1	c192190_g1 [64-71]	1	875.483	0														No Quan Labels	Low	Low	Low	Low	Low	Low	Not Found	1	0.8	K.IKDVSADK.E	[64-71]		Not Used
	Confidence	PSM Ambiguity	Annotated Sequence	Modifications	# Protein Groups	# Proteins	Master Protein Accessions	Protein Accessions	# Missed Cleavages	Charge	DeltaScore	DeltaCn	Rank	m/z [Da]	MH+ [Da]	Theo. MH+ [Da]	DeltaM [ppm]	Deltam/z [Da]	Activation Type	MS Order	Isolation Interference [%]	Average Reporter S/N	Ion Inject Time [ms]	RT [min]	First Scan	Spectrum File	Abundance: 113	Abundance: 114	Abundance: 115	Abundance: 116	Abundance: 117	Abundance: 118	Abundance: 119	XCorr	Percolator q-Value	Percolator PEP
	Low	Selected	[K].IKDVSADK.[E]		1	1	c192190_g1	c192190_g1	1	2	0.025	0	1	438.247	875.486	875.483	2.99	0.00131	HCD (High Energy Collision Dissociation)	MS2	61.6815	26.3	50	47.0891	11985	SHUTSA.raw	35.5	35.6	30.3	35.5	24.8	23.3	25.4	0.8	0.8974	1
	Low	Unambiguous	[K].IKDVSADK.[E]		1	1	c192190_g1	c192190_g1	1	2	0.087	0	1	438.245	875.483	875.483	-0.5	-0.00022	HCD (High Energy Collision Dissociation)	MS2	27.2803	47.9	50	36.3649	9271	SHUTSA.raw	61.9	45.2	67	64.3	60.9	45.1	38.5	0.69	0.8974	1
High	c15607_g1	0.239	0	2	1	1	1	1	456	52.4	6.8	0	1														Low	Low	Low	Low	Low	Low	Low
Checked	Annotated Sequence	Modifications in Master Proteins	Qvality PEP	Qvality q-value	# Protein Groups	# Proteins	# PSMs	Master Protein Accessions	Positions in Master Proteins	# Missed Cleavages	Theo. MH+ [Da]	# Razor Quan Results	Abundance Ratio: (114) / (113)	Abundance Ratio: (116) / (113)	Abundance Ratio: (117) / (113)	Abundance Ratio: (118) / (113)	Abundance Ratio: (119) / (113)	Abundances (Grouped): 113	Abundances (Grouped): 114	Abundances (Grouped): 115	Abundances (Grouped): 116	Abundances (Grouped): 117	Abundances (Grouped): 118	Abundances (Grouped): 119	Abundances (Grouped): 121	Quan Info	Found in Sample: [S98] F12: 114, Sample	Found in Sample: [S99] F12: 115, Sample	Found in Sample: [S100] F12: 116, Sample	Found in Sample: [S101] F12: 117, Sample	Found in Sample: [S102] F12: 118, Sample	Found in Sample: [S103] F12: 119, Sample	Found in Sample: [S104] F12: 121, Sample	Percolator PEP (by Search Engine): Sequest HT	XCorr (by Search Engine): Sequest HT	Sequence in Protein	Positions in Protein	Peptide Group Modifications in Protein	Quan Usage
FALSE	[R].IDLAKEHSR.[F]		1	0.903594	1	1	1	c15607_g1	c15607_g1 [435-443]	1	1068.58	0														No Quan Labels	Low	Low	Low	Low	Low	Low	Not Found	1	0.77	R.IDLAKEHSR.F	[435-443]		Not Used
	Confidence	PSM Ambiguity	Annotated Sequence	Modifications	# Protein Groups	# Proteins	Master Protein Accessions	Protein Accessions	# Missed Cleavages	Charge	DeltaScore	DeltaCn	Rank	m/z [Da]	MH+ [Da]	Theo. MH+ [Da]	DeltaM [ppm]	Deltam/z [Da]	Activation Type	MS Order	Isolation Interference [%]	Average Reporter S/N	Ion Inject Time [ms]	RT [min]	First Scan	Spectrum File	Abundance: 113	Abundance: 114	Abundance: 115	Abundance: 116	Abundance: 117	Abundance: 118	Abundance: 119	XCorr	Percolator q-Value	Percolator PEP
	Low	Unambiguous	[R].IDLAKEHSR.[F]		1	1	c15607_g1	c15607_g1	1	2	0.1299	0	1	534.79	1068.57	1068.58	-6.16	-0.00329	HCD (High Energy Collision Dissociation)	MS2	0	12.8	50	53.4399	13569	SHUTSA.raw	35	11.1	20.1	15.1	7.7	7.5	6	0.77	0.9076	1
High	c33091_g1	0.242	0	14	1	1	1	1	50	5.9	11.05	0	1														Low	Low	Low	Low	Low	Low	Low
Checked	Annotated Sequence	Modifications in Master Proteins	Qvality PEP	Qvality q-value	# Protein Groups	# Proteins	# PSMs	Master Protein Accessions	Positions in Master Proteins	# Missed Cleavages	Theo. MH+ [Da]	# Razor Quan Results	Abundance Ratio: (114) / (113)	Abundance Ratio: (116) / (113)	Abundance Ratio: (117) / (113)	Abundance Ratio: (118) / (113)	Abundance Ratio: (119) / (113)	Abundances (Grouped): 113	Abundances (Grouped): 114	Abundances (Grouped): 115	Abundances (Grouped): 116	Abundances (Grouped): 117	Abundances (Grouped): 118	Abundances (Grouped): 119	Abundances (Grouped): 121	Quan Info	Found in Sample: [S98] F12: 114, Sample	Found in Sample: [S99] F12: 115, Sample	Found in Sample: [S100] F12: 116, Sample	Found in Sample: [S101] F12: 117, Sample	Found in Sample: [S102] F12: 118, Sample	Found in Sample: [S103] F12: 119, Sample	Found in Sample: [S104] F12: 121, Sample	Percolator PEP (by Search Engine): Sequest HT	XCorr (by Search Engine): Sequest HT	Sequence in Protein	Positions in Protein	Peptide Group Modifications in Protein	Quan Usage
FALSE	[K].FVTNLKK.[F]		1	0.944118	1	1	1	c33091_g1	c33091_g1 [41-47]	1	849.519	0														No Quan Labels	Low	Low	Low	Low	Low	Low	Not Found	1	0.53	K.FVTNLKK.F	[41-47]		Not Used
	Confidence	PSM Ambiguity	Annotated Sequence	Modifications	# Protein Groups	# Proteins	Master Protein Accessions	Protein Accessions	# Missed Cleavages	Charge	DeltaScore	DeltaCn	Rank	m/z [Da]	MH+ [Da]	Theo. MH+ [Da]	DeltaM [ppm]	Deltam/z [Da]	Activation Type	MS Order	Isolation Interference [%]	Average Reporter S/N	Ion Inject Time [ms]	RT [min]	First Scan	Spectrum File	Abundance: 113	Abundance: 114	Abundance: 115	Abundance: 116	Abundance: 117	Abundance: 118	Abundance: 119	XCorr	Percolator q-Value	Percolator PEP
	Low	Selected	[K].FVTNLKK.[F]		1	1	c33091_g1	c33091_g1	1	2	0	0	1	425.262	849.517	849.519	-2.94	-0.00125	HCD (High Energy Collision Dissociation)	MS2	0	21.6	50	36.4631	9298	SHUTSA.raw	45.2	18.3	44.4	15.4	13.9	17.7	17.7	0.53	0.9536	1
High	c168125_g1	0.172	0	9	1	1	1	1	109	11.3	4.37	0	1	0.844	0.811	0.733	0.747	3.209	1.868	86.8	73.3	70.4	63.7	64.9	278.7	162.2	Low	Low	Low	Low	Low	Low	Low
Checked	Annotated Sequence	Modifications in Master Proteins	Qvality PEP	Qvality q-value	# Protein Groups	# Proteins	# PSMs	Master Protein Accessions	Positions in Master Proteins	# Missed Cleavages	Theo. MH+ [Da]	# Razor Quan Results	Abundance Ratio: (114) / (113)	Abundance Ratio: (116) / (113)	Abundance Ratio: (117) / (113)	Abundance Ratio: (118) / (113)	Abundance Ratio: (119) / (113)	Abundances (Grouped): 113	Abundances (Grouped): 114	Abundances (Grouped): 115	Abundances (Grouped): 116	Abundances (Grouped): 117	Abundances (Grouped): 118	Abundances (Grouped): 119	Abundances (Grouped): 121	Quan Info	Found in Sample: [S98] F12: 114, Sample	Found in Sample: [S99] F12: 115, Sample	Found in Sample: [S100] F12: 116, Sample	Found in Sample: [S101] F12: 117, Sample	Found in Sample: [S102] F12: 118, Sample	Found in Sample: [S103] F12: 119, Sample	Found in Sample: [S104] F12: 121, Sample	Percolator PEP (by Search Engine): Sequest HT	XCorr (by Search Engine): Sequest HT	Sequence in Protein	Positions in Protein	Peptide Group Modifications in Protein	Quan Usage
FALSE	[R].LPLVALVAPK.[M]		1	0.892361	1	1	1	c168125_g1	c168125_g1 [13-22]	0	1324.89	0	0.844	0.733	0.747	3.209	1.868	86.8	73.3	70.4	63.7	64.9	278.7	162.2			Low	Low	Low	Low	Low	Low	Not Found	1	0.33	R.LPLVALVAPK.M	[13-22]		Used
	Confidence	PSM Ambiguity	Annotated Sequence	Modifications	# Protein Groups	# Proteins	Master Protein Accessions	Protein Accessions	# Missed Cleavages	Charge	DeltaScore	DeltaCn	Rank	m/z [Da]	MH+ [Da]	Theo. MH+ [Da]	DeltaM [ppm]	Deltam/z [Da]	Activation Type	MS Order	Isolation Interference [%]	Average Reporter S/N	Ion Inject Time [ms]	RT [min]	First Scan	Spectrum File	Abundance: 113	Abundance: 114	Abundance: 115	Abundance: 116	Abundance: 117	Abundance: 118	Abundance: 119	XCorr	Percolator q-Value	Percolator PEP
	Low	Unambiguous	[R].LPLVALVAPk.[M]	K10(iTRAQ8plex)	1	1	c168125_g1	c168125_g1	0	3	0.1212	0	1	442.303	1324.9	1324.89	6.52	0.00288	HCD (High Energy Collision Dissociation)	MS2	25.0517	30.4	50	19.1777	4257	SHUTSA.raw	29.9	22.5	27.2	16.4	16.1	81.9	49	0.33	0.9039	1
High	c71420_g1	0.246	0	0	1	3	1	1	1292	145.7	6.29	0	1														Low	Low	Low	Low	Low	Low	Low
Checked	Annotated Sequence	Modifications in Master Proteins	Qvality PEP	Qvality q-value	# Protein Groups	# Proteins	# PSMs	Master Protein Accessions	Positions in Master Proteins	# Missed Cleavages	Theo. MH+ [Da]	# Razor Quan Results	Abundance Ratio: (114) / (113)	Abundance Ratio: (116) / (113)	Abundance Ratio: (117) / (113)	Abundance Ratio: (118) / (113)	Abundance Ratio: (119) / (113)	Abundances (Grouped): 113	Abundances (Grouped): 114	Abundances (Grouped): 115	Abundances (Grouped): 116	Abundances (Grouped): 117	Abundances (Grouped): 118	Abundances (Grouped): 119	Abundances (Grouped): 121	Quan Info	Found in Sample: [S98] F12: 114, Sample	Found in Sample: [S99] F12: 115, Sample	Found in Sample: [S100] F12: 116, Sample	Found in Sample: [S101] F12: 117, Sample	Found in Sample: [S102] F12: 118, Sample	Found in Sample: [S103] F12: 119, Sample	Found in Sample: [S104] F12: 121, Sample	Percolator PEP (by Search Engine): Sequest HT	XCorr (by Search Engine): Sequest HT	Sequence in Protein	Positions in Protein	Peptide Group Modifications in Protein	Quan Usage
FALSE	[K].FKLGTK.[T]		1	0.844476	1	1	3	c71420_g1	c71420_g1 [673-678]	1	693.429	0														No Quan Labels	Low	Low	Low	Low	Low	Low	Not Found	1	0.85	K.FKLGTK.T	[673-678]		Not Used
	Confidence	PSM Ambiguity	Annotated Sequence	Modifications	# Protein Groups	# Proteins	Master Protein Accessions	Protein Accessions	# Missed Cleavages	Charge	DeltaScore	DeltaCn	Rank	m/z [Da]	MH+ [Da]	Theo. MH+ [Da]	DeltaM [ppm]	Deltam/z [Da]	Activation Type	MS Order	Isolation Interference [%]	Average Reporter S/N	Ion Inject Time [ms]	RT [min]	First Scan	Spectrum File	Abundance: 113	Abundance: 114	Abundance: 115	Abundance: 116	Abundance: 117	Abundance: 118	Abundance: 119	XCorr	Percolator q-Value	Percolator PEP
	Low	Selected	[K].FKLGTK.[T]		1	1	c71420_g1	c71420_g1	1	2	0	0	1	347.22	693.433	693.429	4.81	0.00167	HCD (High Energy Collision Dissociation)	MS2	28.1166	10.2	22.747	23.8705	5829	SHUTSA.raw	17.7	13.4	12.3	6	9	15.1	7.8	0.75	0.8856	1
	Low	Selected	[K].FKLGTK.[T]		1	1	c71420_g1	c71420_g1	1	2	0.0118	0	1	347.22	693.433	693.429	5.43	0.00188	HCD (High Energy Collision Dissociation)	MS2	33.4169	21.7	24.528	23.3595	5658	SHUTSA.raw	35.5	27.5	24	22.4	15.9	23.3	24.8	0.85	0.8856	1
	Low	Rejected	[K].FKLGTK.[T]		1	1	c71420_g1	c71420_g1	1	2		0.0122	2	347.221	693.435	693.429	7.9	0.00274	HCD (High Energy Collision Dissociation)	MS2	23.2739	10.4	25.34	23.7018	5781	SHUTSA.raw	22.1	14	11.8	7.9	6.6	10.7	10	0.81	0.9536	1
High	c80515_g1	0.182	0	2	1	3	1	1	340	37.8	8.21	0	1	0.499	0.55	0.629	0.669	0.487	0.433	187.5	93.6	103.1	118	125.4	91.4	81.1	Low	Low	Low	Low	Low	Low	Low
Checked	Annotated Sequence	Modifications in Master Proteins	Qvality PEP	Qvality q-value	# Protein Groups	# Proteins	# PSMs	Master Protein Accessions	Positions in Master Proteins	# Missed Cleavages	Theo. MH+ [Da]	# Razor Quan Results	Abundance Ratio: (114) / (113)	Abundance Ratio: (116) / (113)	Abundance Ratio: (117) / (113)	Abundance Ratio: (118) / (113)	Abundance Ratio: (119) / (113)	Abundances (Grouped): 113	Abundances (Grouped): 114	Abundances (Grouped): 115	Abundances (Grouped): 116	Abundances (Grouped): 117	Abundances (Grouped): 118	Abundances (Grouped): 119	Abundances (Grouped): 121	Quan Info	Found in Sample: [S98] F12: 114, Sample	Found in Sample: [S99] F12: 115, Sample	Found in Sample: [S100] F12: 116, Sample	Found in Sample: [S101] F12: 117, Sample	Found in Sample: [S102] F12: 118, Sample	Found in Sample: [S103] F12: 119, Sample	Found in Sample: [S104] F12: 121, Sample	Percolator PEP (by Search Engine): Sequest HT	XCorr (by Search Engine): Sequest HT	Sequence in Protein	Positions in Protein	Peptide Group Modifications in Protein	Quan Usage
FALSE	[K].VAVVGIER.[K]		1	0.882781	1	3	3	c80515_g1	c80515_g1 [93-100]	0	1146.71	0	0.499	0.629	0.669	0.487	0.433	187.5	93.6	103.1	118	125.4	91.4	81.1			Low	Low	Low	Low	Low	Low	Not Found	1	1.33	K.VAVVGIER.K	[93-100]		Used
	Confidence	PSM Ambiguity	Annotated Sequence	Modifications	# Protein Groups	# Proteins	Master Protein Accessions	Protein Accessions	# Missed Cleavages	Charge	DeltaScore	DeltaCn	Rank	m/z [Da]	MH+ [Da]	Theo. MH+ [Da]	DeltaM [ppm]	Deltam/z [Da]	Activation Type	MS Order	Isolation Interference [%]	Average Reporter S/N	Ion Inject Time [ms]	RT [min]	First Scan	Spectrum File	Abundance: 113	Abundance: 114	Abundance: 115	Abundance: 116	Abundance: 117	Abundance: 118	Abundance: 119	XCorr	Percolator q-Value	Percolator PEP
	Low	Unambiguous	[K].vAVVGIER.[K]	N-Term(iTRAQ8plex)	1	3	c80515_g1	c80515_g4; c187364_g1; c80515_g1	0	2	0.0602	0	1	573.86	1146.71	1146.71	-2.15	-0.00123	HCD (High Energy Collision Dissociation)	MS2	32.4905	13	50	21.7761	5077	SHUTSA.raw	27.4	12.2	16.9	12.9	13.2	11.4	10.4	1.33	0.9015	1
	Low	Rejected	[K].vAVVGIER.[K]	N-Term(iTRAQ8plex)	1	3	c80515_g1	c80515_g4; c187364_g1; c80515_g1	0	2		0	2	573.861	1146.71	1146.71	-0.34	-0.00019	HCD (High Energy Collision Dissociation)	MS2	0	12.2	50	21.583	5006	SHUTSA.raw	33.5	13.3	13.1	10.9	10.8	7.3	8.6	1.03	0.9552	1
	Low	Selected	[K].vAVVGIER.[K]	N-Term(iTRAQ8plex)	1	3	c80515_g1	c80515_g4; c187364_g1; c80515_g1	0	2	0.0256	0	1	573.858	1146.71	1146.71	-5.34	-0.00306	HCD (High Energy Collision Dissociation)	MS2	0	18.1	50	25.2152	6192	SHUTSA.raw	33	18.3	27.8	15.1	15.3	18.3	16.9	0.78	0.9552	1
High	c53470_g1	0.142	0	1	1	1	1	1	552	61.3	6.86	0	1														Low	Low	Low	Low	Low	Low	Low
Checked	Annotated Sequence	Modifications in Master Proteins	Qvality PEP	Qvality q-value	# Protein Groups	# Proteins	# PSMs	Master Protein Accessions	Positions in Master Proteins	# Missed Cleavages	Theo. MH+ [Da]	# Razor Quan Results	Abundance Ratio: (114) / (113)	Abundance Ratio: (116) / (113)	Abundance Ratio: (117) / (113)	Abundance Ratio: (118) / (113)	Abundance Ratio: (119) / (113)	Abundances (Grouped): 113	Abundances (Grouped): 114	Abundances (Grouped): 115	Abundances (Grouped): 116	Abundances (Grouped): 117	Abundances (Grouped): 118	Abundances (Grouped): 119	Abundances (Grouped): 121	Quan Info	Found in Sample: [S98] F12: 114, Sample	Found in Sample: [S99] F12: 115, Sample	Found in Sample: [S100] F12: 116, Sample	Found in Sample: [S101] F12: 117, Sample	Found in Sample: [S102] F12: 118, Sample	Found in Sample: [S103] F12: 119, Sample	Found in Sample: [S104] F12: 121, Sample	Percolator PEP (by Search Engine): Sequest HT	XCorr (by Search Engine): Sequest HT	Sequence in Protein	Positions in Protein	Peptide Group Modifications in Protein	Quan Usage
FALSE	[R].LDLPLSK.[V]		1	0.863498	1	1	1	c53470_g1	c53470_g1 [224-230]	0	785.477	0														No Quan Labels	Low	Low	Low	Low	Low	Low	Not Found	1	0.57	R.LDLPLSK.V	[224-230]		Not Used
	Confidence	PSM Ambiguity	Annotated Sequence	Modifications	# Protein Groups	# Proteins	Master Protein Accessions	Protein Accessions	# Missed Cleavages	Charge	DeltaScore	DeltaCn	Rank	m/z [Da]	MH+ [Da]	Theo. MH+ [Da]	DeltaM [ppm]	Deltam/z [Da]	Activation Type	MS Order	Isolation Interference [%]	Average Reporter S/N	Ion Inject Time [ms]	RT [min]	First Scan	Spectrum File	Abundance: 113	Abundance: 114	Abundance: 115	Abundance: 116	Abundance: 117	Abundance: 118	Abundance: 119	XCorr	Percolator q-Value	Percolator PEP
	Low	Unambiguous	[R].LDLPLSK.[V]		1	1	c53470_g1	c53470_g1	0	2	0.1754	0	1	393.239	785.47	785.477	-8.24	-0.00323	HCD (High Energy Collision Dissociation)	MS2	32.4472	104.4	22.846	39.4138	10074	SHUTSA.raw	148.4	134.5	114.1	121.4	104.8	110.7	101.4	0.57	0.8974	1
High	c162221_g1	0.143	0	1	1	1	1	1	805	91.1	5.43	0	1	1.146	0.925	0.663	0.682	1.251	0.744	124.8	143	115.5	82.7	85.1	156.1	92.8	Low	Low	Low	Low	Low	Low	Low
Checked	Annotated Sequence	Modifications in Master Proteins	Qvality PEP	Qvality q-value	# Protein Groups	# Proteins	# PSMs	Master Protein Accessions	Positions in Master Proteins	# Missed Cleavages	Theo. MH+ [Da]	# Razor Quan Results	Abundance Ratio: (114) / (113)	Abundance Ratio: (116) / (113)	Abundance Ratio: (117) / (113)	Abundance Ratio: (118) / (113)	Abundance Ratio: (119) / (113)	Abundances (Grouped): 113	Abundances (Grouped): 114	Abundances (Grouped): 115	Abundances (Grouped): 116	Abundances (Grouped): 117	Abundances (Grouped): 118	Abundances (Grouped): 119	Abundances (Grouped): 121	Quan Info	Found in Sample: [S98] F12: 114, Sample	Found in Sample: [S99] F12: 115, Sample	Found in Sample: [S100] F12: 116, Sample	Found in Sample: [S101] F12: 117, Sample	Found in Sample: [S102] F12: 118, Sample	Found in Sample: [S103] F12: 119, Sample	Found in Sample: [S104] F12: 121, Sample	Percolator PEP (by Search Engine): Sequest HT	XCorr (by Search Engine): Sequest HT	Sequence in Protein	Positions in Protein	Peptide Group Modifications in Protein	Quan Usage
FALSE	[K].DKGPSKASK.[E]		1	0.844476	1	1	1	c162221_g1	c162221_g1 [762-770]	2	1221.71	0	1.146	0.663	0.682	1.251	0.744	124.8	143	115.5	82.7	85.1	156.1	92.8			Low	Low	Low	Low	Low	Low	Not Found	1	0.45	K.DKGPSKASK.E	[762-770]		Used
	Confidence	PSM Ambiguity	Annotated Sequence	Modifications	# Protein Groups	# Proteins	Master Protein Accessions	Protein Accessions	# Missed Cleavages	Charge	DeltaScore	DeltaCn	Rank	m/z [Da]	MH+ [Da]	Theo. MH+ [Da]	DeltaM [ppm]	Deltam/z [Da]	Activation Type	MS Order	Isolation Interference [%]	Average Reporter S/N	Ion Inject Time [ms]	RT [min]	First Scan	Spectrum File	Abundance: 113	Abundance: 114	Abundance: 115	Abundance: 116	Abundance: 117	Abundance: 118	Abundance: 119	XCorr	Percolator q-Value	Percolator PEP
	Low	Unambiguous	[K].dKGPSKASK.[E]	N-Term(iTRAQ8plex)	1	1	c162221_g1	c162221_g1	2	2	0.0667	0	1	611.36	1221.71	1221.71	2.45	0.0015	HCD (High Energy Collision Dissociation)	MS2	27.6101	17	50	33.0831	8363	SHUTSA.raw	23.6	24.1	24.5	11.7	11.6	25.2	15.4	0.45	0.8974	1
High	c119594_g1	0.147	0	5	2	3	2	1	375	41.4	6.77	0	2														Low	Low	Low	Low	Low	Low	Low
Checked	Annotated Sequence	Modifications in Master Proteins	Qvality PEP	Qvality q-value	# Protein Groups	# Proteins	# PSMs	Master Protein Accessions	Positions in Master Proteins	# Missed Cleavages	Theo. MH+ [Da]	# Razor Quan Results	Abundance Ratio: (114) / (113)	Abundance Ratio: (116) / (113)	Abundance Ratio: (117) / (113)	Abundance Ratio: (118) / (113)	Abundance Ratio: (119) / (113)	Abundances (Grouped): 113	Abundances (Grouped): 114	Abundances (Grouped): 115	Abundances (Grouped): 116	Abundances (Grouped): 117	Abundances (Grouped): 118	Abundances (Grouped): 119	Abundances (Grouped): 121	Quan Info	Found in Sample: [S98] F12: 114, Sample	Found in Sample: [S99] F12: 115, Sample	Found in Sample: [S100] F12: 116, Sample	Found in Sample: [S101] F12: 117, Sample	Found in Sample: [S102] F12: 118, Sample	Found in Sample: [S103] F12: 119, Sample	Found in Sample: [S104] F12: 121, Sample	Percolator PEP (by Search Engine): Sequest HT	XCorr (by Search Engine): Sequest HT	Sequence in Protein	Positions in Protein	Peptide Group Modifications in Protein	Quan Usage
FALSE	[R].ALDIRLVIKDGK.[E]		1	0.873348	1	1	1	c119594_g1	c119594_g1 [135-146]	2	1340.83	0														No Quan Labels	Low	Low	Low	Low	Low	Low	Not Found	1	0.72	R.ALDIRLVIKDGK.E	[135-146]		Not Used
	Confidence	PSM Ambiguity	Annotated Sequence	Modifications	# Protein Groups	# Proteins	Master Protein Accessions	Protein Accessions	# Missed Cleavages	Charge	DeltaScore	DeltaCn	Rank	m/z [Da]	MH+ [Da]	Theo. MH+ [Da]	DeltaM [ppm]	Deltam/z [Da]	Activation Type	MS Order	Isolation Interference [%]	Average Reporter S/N	Ion Inject Time [ms]	RT [min]	First Scan	Spectrum File	Abundance: 113	Abundance: 114	Abundance: 115	Abundance: 116	Abundance: 117	Abundance: 118	Abundance: 119	XCorr	Percolator q-Value	Percolator PEP
	Low	Unambiguous	[R].ALDIRLVIKDGK.[E]		1	1	c119594_g1	c119594_g1	2	2	0.2083	0	1	670.912	1340.82	1340.83	-7.22	-0.00484	HCD (High Energy Collision Dissociation)	MS2	29.4464	17.2	50	23.0244	5520	SHUTSA.raw	34.5	22	24.8	12.3	10.5	17.2	16.3	0.72	0.8974	1
FALSE	[K].LAAWAR.[S]		1	0.926357	1	1	2	c119594_g1	c119594_g1 [174-179]	0	687.394	0														No Quan Labels	Low	Low	Low	Low	Low	Low	Not Found	1	0.63	K.LAAWAR.S	[174-179]		Not Used
	Confidence	PSM Ambiguity	Annotated Sequence	Modifications	# Protein Groups	# Proteins	Master Protein Accessions	Protein Accessions	# Missed Cleavages	Charge	DeltaScore	DeltaCn	Rank	m/z [Da]	MH+ [Da]	Theo. MH+ [Da]	DeltaM [ppm]	Deltam/z [Da]	Activation Type	MS Order	Isolation Interference [%]	Average Reporter S/N	Ion Inject Time [ms]	RT [min]	First Scan	Spectrum File	Abundance: 113	Abundance: 114	Abundance: 115	Abundance: 116	Abundance: 117	Abundance: 118	Abundance: 119	XCorr	Percolator q-Value	Percolator PEP
	Low	Unambiguous	[K].LAAWAR.[S]		1	1	c119594_g1	c119594_g1	0	2	0.2642	0	1	344.197	687.387	687.394	-9.07	-0.00312	HCD (High Energy Collision Dissociation)	MS2	64.8208	41.6	50	21.2809	4888	SHUTSA.raw	148.9	26.1	55.6	23.4	26	27	25.6	0.53	0.9301	1
	Low	Unambiguous	[K].LAAWAR.[S]		1	1	c119594_g1	c119594_g1	0	2	0.2063	0	1	344.197	687.387	687.394	-9.42	-0.00324	HCD (High Energy Collision Dissociation)	MS2	60.1829	53.6	50	21.5732	5001	SHUTSA.raw	201.4	36.3	79.4	34.4	23.1	23.1	30.8	0.63	0.9308	1
High	c76063_g2	0.148	0	1	1	3	1	1	984	112.2	5.36	0	1														Low	Low	Low	Low	Low	Low	Low
Checked	Annotated Sequence	Modifications in Master Proteins	Qvality PEP	Qvality q-value	# Protein Groups	# Proteins	# PSMs	Master Protein Accessions	Positions in Master Proteins	# Missed Cleavages	Theo. MH+ [Da]	# Razor Quan Results	Abundance Ratio: (114) / (113)	Abundance Ratio: (116) / (113)	Abundance Ratio: (117) / (113)	Abundance Ratio: (118) / (113)	Abundance Ratio: (119) / (113)	Abundances (Grouped): 113	Abundances (Grouped): 114	Abundances (Grouped): 115	Abundances (Grouped): 116	Abundances (Grouped): 117	Abundances (Grouped): 118	Abundances (Grouped): 119	Abundances (Grouped): 121	Quan Info	Found in Sample: [S98] F12: 114, Sample	Found in Sample: [S99] F12: 115, Sample	Found in Sample: [S100] F12: 116, Sample	Found in Sample: [S101] F12: 117, Sample	Found in Sample: [S102] F12: 118, Sample	Found in Sample: [S103] F12: 119, Sample	Found in Sample: [S104] F12: 121, Sample	Percolator PEP (by Search Engine): Sequest HT	XCorr (by Search Engine): Sequest HT	Sequence in Protein	Positions in Protein	Peptide Group Modifications in Protein	Quan Usage
FALSE	[K].TGLLQFSIIDK.[E]		1	0.882781	1	1	3	c76063_g2	c76063_g2 [189-199]	0	1234.7	0														No Quan Labels	Low	Low	Low	Low	Low	Low	Not Found	1	0.66	K.TGLLQFSIIDK.E	[189-199]		Not Used
	Confidence	PSM Ambiguity	Annotated Sequence	Modifications	# Protein Groups	# Proteins	Master Protein Accessions	Protein Accessions	# Missed Cleavages	Charge	DeltaScore	DeltaCn	Rank	m/z [Da]	MH+ [Da]	Theo. MH+ [Da]	DeltaM [ppm]	Deltam/z [Da]	Activation Type	MS Order	Isolation Interference [%]	Average Reporter S/N	Ion Inject Time [ms]	RT [min]	First Scan	Spectrum File	Abundance: 113	Abundance: 114	Abundance: 115	Abundance: 116	Abundance: 117	Abundance: 118	Abundance: 119	XCorr	Percolator q-Value	Percolator PEP
	Low	Rejected	[K].TGLLQFSIIDK.[E]		1	1	c76063_g2	c76063_g2	0	2	0.0408	0	1	617.861	1234.71	1234.7	8.39	0.00518	HCD (High Energy Collision Dissociation)	MS2		8.3	50	68.7723	17203	SHUTSA.raw	13.7	10.7	11	7.7	6.6	9.9	6.5	0.49	0.9015	1
	Low	Unambiguous	[K].TGLLQFSIIDK.[E]		1	1	c76063_g2	c76063_g2	0	2	0.1515	0	1	617.858	1234.71	1234.7	4.44	0.00274	HCD (High Energy Collision Dissociation)	MS2	34.7103	4.6	50	69.8053	17511	SHUTSA.raw	5.7	4.3	5.3	5	5.6	6.1	4.9	0.66	0.9039	1
	Low	Rejected	[K].TGLLQFSIIDK.[E]		1	1	c76063_g2	c76063_g2	0	2		0.0426	3	617.861	1234.71	1234.7	8.69	0.00536	HCD (High Energy Collision Dissociation)	MS2	50.4714	6.1	50	70.4941	17728	SHUTSA.raw	8.8	5.9	8.3	6.8	5.6	6.3	7	0.45	0.9301	1
High	c22868_g1	0.15	0	10	1	1	1	1	67	7.4	11.22	0	1														Low	Low	Low	Low	Low	Low	Low
Checked	Annotated Sequence	Modifications in Master Proteins	Qvality PEP	Qvality q-value	# Protein Groups	# Proteins	# PSMs	Master Protein Accessions	Positions in Master Proteins	# Missed Cleavages	Theo. MH+ [Da]	# Razor Quan Results	Abundance Ratio: (114) / (113)	Abundance Ratio: (116) / (113)	Abundance Ratio: (117) / (113)	Abundance Ratio: (118) / (113)	Abundance Ratio: (119) / (113)	Abundances (Grouped): 113	Abundances (Grouped): 114	Abundances (Grouped): 115	Abundances (Grouped): 116	Abundances (Grouped): 117	Abundances (Grouped): 118	Abundances (Grouped): 119	Abundances (Grouped): 121	Quan Info	Found in Sample: [S98] F12: 114, Sample	Found in Sample: [S99] F12: 115, Sample	Found in Sample: [S100] F12: 116, Sample	Found in Sample: [S101] F12: 117, Sample	Found in Sample: [S102] F12: 118, Sample	Found in Sample: [S103] F12: 119, Sample	Found in Sample: [S104] F12: 121, Sample	Percolator PEP (by Search Engine): Sequest HT	XCorr (by Search Engine): Sequest HT	Sequence in Protein	Positions in Protein	Peptide Group Modifications in Protein	Quan Usage
FALSE	[-].FSGKGVR.[R]		1	0.901167	1	1	1	c22868_g1	c22868_g1 [1-7]	1	792.436	0														No Quan Labels	Low	Low	Low	Low	Low	Low	Not Found	1	0.56	-.FSGKGVR.R	[1-7]		Not Used
	Confidence	PSM Ambiguity	Annotated Sequence	Modifications	# Protein Groups	# Proteins	Master Protein Accessions	Protein Accessions	# Missed Cleavages	Charge	DeltaScore	DeltaCn	Rank	m/z [Da]	MH+ [Da]	Theo. MH+ [Da]	DeltaM [ppm]	Deltam/z [Da]	Activation Type	MS Order	Isolation Interference [%]	Average Reporter S/N	Ion Inject Time [ms]	RT [min]	First Scan	Spectrum File	Abundance: 113	Abundance: 114	Abundance: 115	Abundance: 116	Abundance: 117	Abundance: 118	Abundance: 119	XCorr	Percolator q-Value	Percolator PEP
	Low	Selected	[-].fSGKGVR.[R]	N-Term(Prot)(Acetyl)	1	1	c22868_g1	c22868_g1	1	2	0.0357	0	1	396.72	792.432	792.436	-4.93	-0.00195	HCD (High Energy Collision Dissociation)	MS2	51.1733	176.5	50	22.77	5413	SHUTSA.raw	155.5	184.2	231.1	288.7	186.7	160.9	204.5	0.56	0.9041	1
High	c55023_g1	0.154	0	1	1	1	1	1	950	105	5.3	0	1														Low	Low	Low	Low	Low	Low	Low
Checked	Annotated Sequence	Modifications in Master Proteins	Qvality PEP	Qvality q-value	# Protein Groups	# Proteins	# PSMs	Master Protein Accessions	Positions in Master Proteins	# Missed Cleavages	Theo. MH+ [Da]	# Razor Quan Results	Abundance Ratio: (114) / (113)	Abundance Ratio: (116) / (113)	Abundance Ratio: (117) / (113)	Abundance Ratio: (118) / (113)	Abundance Ratio: (119) / (113)	Abundances (Grouped): 113	Abundances (Grouped): 114	Abundances (Grouped): 115	Abundances (Grouped): 116	Abundances (Grouped): 117	Abundances (Grouped): 118	Abundances (Grouped): 119	Abundances (Grouped): 121	Quan Info	Found in Sample: [S98] F12: 114, Sample	Found in Sample: [S99] F12: 115, Sample	Found in Sample: [S100] F12: 116, Sample	Found in Sample: [S101] F12: 117, Sample	Found in Sample: [S102] F12: 118, Sample	Found in Sample: [S103] F12: 119, Sample	Found in Sample: [S104] F12: 121, Sample	Percolator PEP (by Search Engine): Sequest HT	XCorr (by Search Engine): Sequest HT	Sequence in Protein	Positions in Protein	Peptide Group Modifications in Protein	Quan Usage
FALSE	[K].LLETAWLLQKPK.[L]		1	0.88822	1	1	1	c55023_g1	c55023_g1 [234-245]	0	2048.27	0														No Quan Values	Low	Low	Low	Low	Low	Low	Not Found	1	0.28	K.LLETAWLLQKPK.L	[234-245]		Not Used
	Confidence	PSM Ambiguity	Annotated Sequence	Modifications	# Protein Groups	# Proteins	Master Protein Accessions	Protein Accessions	# Missed Cleavages	Charge	DeltaScore	DeltaCn	Rank	m/z [Da]	MH+ [Da]	Theo. MH+ [Da]	DeltaM [ppm]	Deltam/z [Da]	Activation Type	MS Order	Isolation Interference [%]	Average Reporter S/N	Ion Inject Time [ms]	RT [min]	First Scan	Spectrum File	Abundance: 113	Abundance: 114	Abundance: 115	Abundance: 116	Abundance: 117	Abundance: 118	Abundance: 119	XCorr	Percolator q-Value	Percolator PEP
	Low	Unambiguous	[K].LLETAWLLQkPk.[L]	K10(iTRAQ8plex); K12(iTRAQ8plex)	1	1	c55023_g1	c55023_g1	0	2	0.5357	0	1	1024.65	2048.29	2048.27	6.9	0.00707	HCD (High Energy Collision Dissociation)	MS2	38.3684	5.4	50	69.8081	17513	SHUTSA.raw	3.4	8.4	5.5	7.8	5	6.9	6.3	0.28	0.9039	1
High	c58645_g1	0.16	0	1	2	5	2	1	760	85.2	6.57	0	2														Low	Low	Low	Low	Low	Low	Low
Checked	Annotated Sequence	Modifications in Master Proteins	Qvality PEP	Qvality q-value	# Protein Groups	# Proteins	# PSMs	Master Protein Accessions	Positions in Master Proteins	# Missed Cleavages	Theo. MH+ [Da]	# Razor Quan Results	Abundance Ratio: (114) / (113)	Abundance Ratio: (116) / (113)	Abundance Ratio: (117) / (113)	Abundance Ratio: (118) / (113)	Abundance Ratio: (119) / (113)	Abundances (Grouped): 113	Abundances (Grouped): 114	Abundances (Grouped): 115	Abundances (Grouped): 116	Abundances (Grouped): 117	Abundances (Grouped): 118	Abundances (Grouped): 119	Abundances (Grouped): 121	Quan Info	Found in Sample: [S98] F12: 114, Sample	Found in Sample: [S99] F12: 115, Sample	Found in Sample: [S100] F12: 116, Sample	Found in Sample: [S101] F12: 117, Sample	Found in Sample: [S102] F12: 118, Sample	Found in Sample: [S103] F12: 119, Sample	Found in Sample: [S104] F12: 121, Sample	Percolator PEP (by Search Engine): Sequest HT	XCorr (by Search Engine): Sequest HT	Sequence in Protein	Positions in Protein	Peptide Group Modifications in Protein	Quan Usage
FALSE	[R].TSKASVALAAA.[-]		1	0.844476	1	1	4	c58645_g1	c58645_g1 [750-760]	1	989.563	0														No Quan Labels	Low	Low	Low	Low	Low	Low	Low	1	0.47	R.TSKASVALAAA.-	[750-760]		Not Used
	Confidence	PSM Ambiguity	Annotated Sequence	Modifications	# Protein Groups	# Proteins	Master Protein Accessions	Protein Accessions	# Missed Cleavages	Charge	DeltaScore	DeltaCn	Rank	m/z [Da]	MH+ [Da]	Theo. MH+ [Da]	DeltaM [ppm]	Deltam/z [Da]	Activation Type	MS Order	Isolation Interference [%]	Average Reporter S/N	Ion Inject Time [ms]	RT [min]	First Scan	Spectrum File	Abundance: 113	Abundance: 114	Abundance: 115	Abundance: 116	Abundance: 117	Abundance: 118	Abundance: 119	XCorr	Percolator q-Value	Percolator PEP
	Low	Selected	[R].TSKASVALAAA.[-]		1	1	c58645_g1	c58645_g1	1	2	0.0263	0	1	495.286	989.565	989.563	2.12	0.00105	HCD (High Energy Collision Dissociation)	MS2	0	11.9	50	8.2651	1772	SHUTSA.raw	25.1	10.9	11.7	9.1	9.2	10.7	14	0.38	0.8856	1
	Low	Unambiguous	[R].TSKASVALAAA.[-]		1	1	c58645_g1	c58645_g1	1	2	0.2	0	1	495.282	989.556	989.563	-6.33	-0.00313	HCD (High Energy Collision Dissociation)	MS2	33.4931	15.6	50	7.9708	1695	SHUTSA.raw	22.7	12.9	19.6	13	12.5	15.2	21	0.4	0.8974	1
	Low	Selected	[R].TSKASVALAAA.[-]		1	1	c58645_g1	c58645_g1	1	2		0.0303	2	495.284	989.56	989.563	-2.69	-0.00133	HCD (High Energy Collision Dissociation)	MS2	0	9.2	50	7.6387	1616	SHUTSA.raw	12.1	6.7	10.8	8.3	9.5	9.8	12.1	0.32	0.8974	1
	Low	Unambiguous	[R].TSKASVALAAA.[-]		1	1	c58645_g1	c58645_g1	1	2	0.1489	0	1	495.284	989.561	989.563	-1.46	-0.00072	HCD (High Energy Collision Dissociation)	MS2	31.3188	16.1	50	41.0155	10494	SHUTSA.raw	16.5	10.4	17.9	28.2	24.6	13.2	18.2	0.47	0.9272	1
FALSE	[K].ASVALAAA.[-]		1	0.921339	1	1	1	c58645_g1	c58645_g1 [753-760]	0	673.388	0														No Quan Labels	Low	Low	Low	Low	Low	Low	Not Found	1	0.44	K.ASVALAAA.-	[753-760]		Not Used
	Confidence	PSM Ambiguity	Annotated Sequence	Modifications	# Protein Groups	# Proteins	Master Protein Accessions	Protein Accessions	# Missed Cleavages	Charge	DeltaScore	DeltaCn	Rank	m/z [Da]	MH+ [Da]	Theo. MH+ [Da]	DeltaM [ppm]	Deltam/z [Da]	Activation Type	MS Order	Isolation Interference [%]	Average Reporter S/N	Ion Inject Time [ms]	RT [min]	First Scan	Spectrum File	Abundance: 113	Abundance: 114	Abundance: 115	Abundance: 116	Abundance: 117	Abundance: 118	Abundance: 119	XCorr	Percolator q-Value	Percolator PEP
	Low	Selected	[K].ASVALAAA.[-]		1	1	c58645_g1	c58645_g1	0	2		0.0222	2	337.195	673.383	673.388	-7.33	-0.00247	HCD (High Energy Collision Dissociation)	MS2	68.9553	86.2	5.401	40.2207	10292	SHUTSA.raw	78.1	169	243.5	55.4	52.7	41.2	49.6	0.44	0.9187	1
High	c76627_g2	0.162	0	7	1	1	1	1	354	40.1	9.57	0	1														Low	Low	Low	Low	Low	Low	Low
Checked	Annotated Sequence	Modifications in Master Proteins	Qvality PEP	Qvality q-value	# Protein Groups	# Proteins	# PSMs	Master Protein Accessions	Positions in Master Proteins	# Missed Cleavages	Theo. MH+ [Da]	# Razor Quan Results	Abundance Ratio: (114) / (113)	Abundance Ratio: (116) / (113)	Abundance Ratio: (117) / (113)	Abundance Ratio: (118) / (113)	Abundance Ratio: (119) / (113)	Abundances (Grouped): 113	Abundances (Grouped): 114	Abundances (Grouped): 115	Abundances (Grouped): 116	Abundances (Grouped): 117	Abundances (Grouped): 118	Abundances (Grouped): 119	Abundances (Grouped): 121	Quan Info	Found in Sample: [S98] F12: 114, Sample	Found in Sample: [S99] F12: 115, Sample	Found in Sample: [S100] F12: 116, Sample	Found in Sample: [S101] F12: 117, Sample	Found in Sample: [S102] F12: 118, Sample	Found in Sample: [S103] F12: 119, Sample	Found in Sample: [S104] F12: 121, Sample	Percolator PEP (by Search Engine): Sequest HT	XCorr (by Search Engine): Sequest HT	Sequence in Protein	Positions in Protein	Peptide Group Modifications in Protein	Quan Usage
FALSE	[R].IAAILLLLNLLAKKPHGIRWLAIK.[I]		1	0.918718	1	1	1	c76627_g2	c76627_g2 [7-30]	2	2678.73	0														No Quan Labels	Low	Low	Low	Low	Low	Low	Not Found	1	0.15	R.IAAILLLLNLLAKKPHGIRWLAIK.I	[7-30]		Not Used
	Confidence	PSM Ambiguity	Annotated Sequence	Modifications	# Protein Groups	# Proteins	Master Protein Accessions	Protein Accessions	# Missed Cleavages	Charge	DeltaScore	DeltaCn	Rank	m/z [Da]	MH+ [Da]	Theo. MH+ [Da]	DeltaM [ppm]	Deltam/z [Da]	Activation Type	MS Order	Isolation Interference [%]	Average Reporter S/N	Ion Inject Time [ms]	RT [min]	First Scan	Spectrum File	Abundance: 113	Abundance: 114	Abundance: 115	Abundance: 116	Abundance: 117	Abundance: 118	Abundance: 119	XCorr	Percolator q-Value	Percolator PEP
	Low	Unambiguous	[R].IAAILLLLNLLAKKPHGIRWLAIK.[I]		1	1	c76627_g2	c76627_g2	2	3	0.5333	0	1	893.577	2678.72	2678.73	-6.19	-0.00553	HCD (High Energy Collision Dissociation)	MS2	16.717	49.6	50	66.6854	16604	SHUTSA.raw	39.5	68.4	38	43.9	26	139	41.9	0.15	0.9106	1
High	c188644_g1	0.163	0	3	1	3	1	1	202	22.1	7.87	0	1	0.233	0.209	0.339	0.288	0.372	0.261	296.1	69	61.8	100.5	85.2	110.2	77.2	Low	Low	Low	Low	Low	Low	Low
Checked	Annotated Sequence	Modifications in Master Proteins	Qvality PEP	Qvality q-value	# Protein Groups	# Proteins	# PSMs	Master Protein Accessions	Positions in Master Proteins	# Missed Cleavages	Theo. MH+ [Da]	# Razor Quan Results	Abundance Ratio: (114) / (113)	Abundance Ratio: (116) / (113)	Abundance Ratio: (117) / (113)	Abundance Ratio: (118) / (113)	Abundance Ratio: (119) / (113)	Abundances (Grouped): 113	Abundances (Grouped): 114	Abundances (Grouped): 115	Abundances (Grouped): 116	Abundances (Grouped): 117	Abundances (Grouped): 118	Abundances (Grouped): 119	Abundances (Grouped): 121	Quan Info	Found in Sample: [S98] F12: 114, Sample	Found in Sample: [S99] F12: 115, Sample	Found in Sample: [S100] F12: 116, Sample	Found in Sample: [S101] F12: 117, Sample	Found in Sample: [S102] F12: 118, Sample	Found in Sample: [S103] F12: 119, Sample	Found in Sample: [S104] F12: 121, Sample	Percolator PEP (by Search Engine): Sequest HT	XCorr (by Search Engine): Sequest HT	Sequence in Protein	Positions in Protein	Peptide Group Modifications in Protein	Quan Usage
FALSE	[-].GGLGPPR.[V]		1	0.844476	1	1	3	c188644_g1	c188644_g1 [1-7]	0	957.578	1	0.233	0.339	0.288	0.372	0.261	296.1	69	61.8	100.5	85.2	110.2	77.2			Low	Low	Low	Low	Low	Low	Not Found	1	0.57	-.GGLGPPR.V	[1-7]		Used
	Confidence	PSM Ambiguity	Annotated Sequence	Modifications	# Protein Groups	# Proteins	Master Protein Accessions	Protein Accessions	# Missed Cleavages	Charge	DeltaScore	DeltaCn	Rank	m/z [Da]	MH+ [Da]	Theo. MH+ [Da]	DeltaM [ppm]	Deltam/z [Da]	Activation Type	MS Order	Isolation Interference [%]	Average Reporter S/N	Ion Inject Time [ms]	RT [min]	First Scan	Spectrum File	Abundance: 113	Abundance: 114	Abundance: 115	Abundance: 116	Abundance: 117	Abundance: 118	Abundance: 119	XCorr	Percolator q-Value	Percolator PEP
	Low	Unambiguous	[-].gGLGPPR.[V]	N-Term(iTRAQ8plex)	1	1	c188644_g1	c188644_g1	0	2	0.125	0	1	479.29	957.574	957.578	-4.97	-0.00238	HCD (High Energy Collision Dissociation)	MS2	30.2054	14.5	28.63	20.5632	4640	SHUTSA.raw	30.1	18	15.6	9.4	10.8	21	11.3	0.32	0.8974	1
	Low	Rejected	[-].gGLGPPR.[V]	N-Term(iTRAQ8plex)	1	1	c188644_g1	c188644_g1	0	2		0.05	3	479.29	957.572	957.578	-6.76	-0.00323	HCD (High Energy Collision Dissociation)	MS2	19.5061	15.1	10.416	61.9044	15560	SHUTSA.raw	53.5	6.2	16.6	9.7	9.2	14.1	11.6	0.57	0.9307	1
	Low	Unambiguous	[-].gGLGPPR.[V]	N-Term(iTRAQ8plex)	1	1	c188644_g1	c188644_g1	0	2	0.075	0	1	479.29	957.572	957.578	-6.37	-0.00305	HCD (High Energy Collision Dissociation)	MS2	25.6163	41.7	50	16.7361	3668	SHUTSA.raw	149.3	24.2	22.3	40	28.3	38.9	30.4	0.4	0.9552	1
High	c118836_g1	0.167	0	2	1	25	1	1	294	32.7	7.8	0	1														Low	Low	Low	Low	Low	Low	Low
Checked	Annotated Sequence	Modifications in Master Proteins	Qvality PEP	Qvality q-value	# Protein Groups	# Proteins	# PSMs	Master Protein Accessions	Positions in Master Proteins	# Missed Cleavages	Theo. MH+ [Da]	# Razor Quan Results	Abundance Ratio: (114) / (113)	Abundance Ratio: (116) / (113)	Abundance Ratio: (117) / (113)	Abundance Ratio: (118) / (113)	Abundance Ratio: (119) / (113)	Abundances (Grouped): 113	Abundances (Grouped): 114	Abundances (Grouped): 115	Abundances (Grouped): 116	Abundances (Grouped): 117	Abundances (Grouped): 118	Abundances (Grouped): 119	Abundances (Grouped): 121	Quan Info	Found in Sample: [S98] F12: 114, Sample	Found in Sample: [S99] F12: 115, Sample	Found in Sample: [S100] F12: 116, Sample	Found in Sample: [S101] F12: 117, Sample	Found in Sample: [S102] F12: 118, Sample	Found in Sample: [S103] F12: 119, Sample	Found in Sample: [S104] F12: 121, Sample	Percolator PEP (by Search Engine): Sequest HT	XCorr (by Search Engine): Sequest HT	Sequence in Protein	Positions in Protein	Peptide Group Modifications in Protein	Quan Usage
FALSE	[R].KAPAHK.[E]		1	0.846029	1	1	25	c118836_g1	c118836_g1 [248-253]	1	651.394	0														No Quan Labels	Low	Low	Low	Low	Low	Low	Low	1	0.22	R.KAPAHK.E	[248-253]		Not Used
	Confidence	PSM Ambiguity	Annotated Sequence	Modifications	# Protein Groups	# Proteins	Master Protein Accessions	Protein Accessions	# Missed Cleavages	Charge	DeltaScore	DeltaCn	Rank	m/z [Da]	MH+ [Da]	Theo. MH+ [Da]	DeltaM [ppm]	Deltam/z [Da]	Activation Type	MS Order	Isolation Interference [%]	Average Reporter S/N	Ion Inject Time [ms]	RT [min]	First Scan	Spectrum File	Abundance: 113	Abundance: 114	Abundance: 115	Abundance: 116	Abundance: 117	Abundance: 118	Abundance: 119	XCorr	Percolator q-Value	Percolator PEP
	Low	Unambiguous	[R].KAPAHK.[E]		1	1	c118836_g1	c118836_g1	1	2	1	0	1	326.199	651.391	651.394	-4.6	-0.0015	HCD (High Energy Collision Dissociation)	MS2		61.8	2.699	52.69	13391	SHUTSA.raw	57.6	62	61.2	80.4	73.2	64	93.1	0.06	0.8974	1
	Low	Unambiguous	[R].KAPAHK.[E]		1	1	c118836_g1	c118836_g1	1	2	0.0526	0	1	326.199	651.39	651.394	-5.16	-0.00168	HCD (High Energy Collision Dissociation)	MS2	94.7056	83	3.144	29.6719	7443	SHUTSA.raw	68.2	75.7	82	103.9	96.4	94.7	138.9	0.19	0.8974	1
	Low	Rejected	[R].KAPAHK.[E]		1	1	c118836_g1	c118836_g1	1	2		0	3	326.2	651.392	651.394	-2.45	-0.0008	HCD (High Energy Collision Dissociation)	MS2	91.3993	87.8	3.217	58.1445	14672	SHUTSA.raw	80.8	81.9	91.2	111.4	117.3	84.4	132.2	0.02	0.8974	1
	Low	Unambiguous	[R].KAPAHK.[E]		1	1	c118836_g1	c118836_g1	1	2	0.3333	0	1	326.2	651.393	651.394	-1.23	-0.0004	HCD (High Energy Collision Dissociation)	MS2	90.23	88	4.363	44.5523	11383	SHUTSA.raw	71.7	92	90.6	111.9	108.7	92.6	136.4	0.03	0.8974	1
	Low	Rejected	[R].KAPAHK.[E]		1	1	c118836_g1	c118836_g1	1	2		0	2	326.199	651.391	651.394	-3.76	-0.00122	HCD (High Energy Collision Dissociation)	MS2	89.5202	73.4	3.642	50.8634	12953	SHUTSA.raw	58.7	76.6	73.8	89.4	87	78.4	118.6	0.04	0.8974	1
	Low	Unambiguous	[R].KAPAHK.[E]		1	1	c118836_g1	c118836_g1	1	2	0.4091	0	1	326.201	651.394	651.394	1.21	0.00039	HCD (High Energy Collision Dissociation)	MS2	88.8083	81.2	3.206	48.5023	12357	SHUTSA.raw	68.1	82	76	102.7	100.8	90.2	125.1	0.22	0.8974	1
	Low	Unambiguous	[R].KAPAHK.[E]		1	1	c118836_g1	c118836_g1	1	2	0.3333	0	1	326.199	651.39	651.394	-5.82	-0.0019	HCD (High Energy Collision Dissociation)	MS2	94.279	55.2	4.272	7.6787	1626	SHUTSA.raw	18.3	24.8	24.1	28.9	28.9	140	167	0.06	0.8974	1
	Low	Rejected	[R].KAPAHK.[E]		1	1	c118836_g1	c118836_g1	1	2		0	2	326.198	651.389	651.394	-6.85	-0.00223	HCD (High Energy Collision Dissociation)	MS2	92.0079	110.8	2.809	6.0432	1235	SHUTSA.raw	74.5	90.7	91.4	115.4	100.7	176.5	228.1	0.05	0.8974	1
	Low	Unambiguous	[R].KAPAHK.[E]		1	1	c118836_g1	c118836_g1	1	2	1	0	1	326.2	651.393	651.394	-1.7	-0.00055	HCD (High Energy Collision Dissociation)	MS2	87.7737	94.5	4.154	25.959	6401	SHUTSA.raw	72	90	88.7	119.5	110.5	110.5	162.4	0.05	0.9187	1
	Low	Unambiguous	[R].KAPAHK.[E]		1	1	c118836_g1	c118836_g1	1	2	0.3333	0	1	326.199	651.391	651.394	-4.13	-0.00135	HCD (High Energy Collision Dissociation)	MS2	89.484	93.3	4.301	31.75	8012	SHUTSA.raw	76.4	82.8	95.6	116.6	112.7	104.4	154.6	0.03	0.9301	1
	Low	Unambiguous	[R].KAPAHK.[E]		1	1	c118836_g1	c118836_g1	1	2	0.2	0	1	326.199	651.391	651.394	-4.04	-0.00132	HCD (High Energy Collision Dissociation)	MS2	91.1793	96.7	3.804	50.0181	12749	SHUTSA.raw	88.4	99.7	89.9	119.1	125.2	97.9	150.7	0.05	0.9301	1
	Low	Unambiguous	[R].KAPAHK.[E]		1	1	c118836_g1	c118836_g1	1	2	1	0	1	326.199	651.392	651.394	-3.01	-0.00098	HCD (High Energy Collision Dissociation)	MS2	92.1145	77.6	3.071	62.0487	15592	SHUTSA.raw	66.3	77.2	75.3	107.2	96.1	81	115.2	0.02	0.9301	1
	Low	Unambiguous	[R].KAPAHK.[E]		1	1	c118836_g1	c118836_g1	1	2	0.6667	0	1	326.2	651.393	651.394	-1.7	-0.00055	HCD (High Energy Collision Dissociation)	MS2	92.2567	103.6	3.107	55.975	14147	SHUTSA.raw	86	103.6	109.1	136.9	125.8	100.2	164.1	0.09	0.9307	1
	Low	Unambiguous	[R].KAPAHK.[E]		1	1	c118836_g1	c118836_g1	1	2	0.25	0	1	326.199	651.39	651.394	-5.45	-0.00177	HCD (High Energy Collision Dissociation)	MS2	94.8375	99.1	4.266	33.1403	8379	SHUTSA.raw	74.7	104.6	97	120.8	113.2	110.7	167.6	0.04	0.9348	1
	Low	Unambiguous	[R].KAPAHK.[E]		1	1	c118836_g1	c118836_g1	1	2	0.6	0	1	326.199	651.392	651.394	-3.1	-0.00101	HCD (High Energy Collision Dissociation)	MS2	92.6427	143.7	8.236	39.1991	10019	SHUTSA.raw	122.8	137.8	134.5	177.6	167.5	175	227.7	0.1	0.9389	1
	Low	Unambiguous	[R].KAPAHK.[E]		1	1	c118836_g1	c118836_g1	1	2	0.1	0	1	326.198	651.389	651.394	-7.13	-0.00232	HCD (High Energy Collision Dissociation)	MS2	88.3042	103.1	7.813	42.473	10864	SHUTSA.raw	88.1	101.2	100.3	116.3	123.2	117.3	174	0.1	0.9389	1
	Low	Unambiguous	[R].KAPAHK.[E]		1	1	c118836_g1	c118836_g1	1	2	0.2	0	1	326.199	651.392	651.394	-3.2	-0.00104	HCD (High Energy Collision Dissociation)	MS2	90.5033	79.2	3.021	60.9746	15336	SHUTSA.raw	72.3	85.5	79.1	101.3	90.7	82.4	119	0.05	0.9443	1
	Low	Unambiguous	[R].KAPAHK.[E]		1	1	c118836_g1	c118836_g1	1	2	0.5714	0	1	326.199	651.39	651.394	-5.73	-0.00187	HCD (High Energy Collision Dissociation)	MS2	93.3794	106.1	4.207	29.8501	7493	SHUTSA.raw	86.3	100	107.7	126	126.9	119.5	178.5	0.07	0.9456	1
	Low	Unambiguous	[R].KAPAHK.[E]		1	1	c118836_g1	c118836_g1	1	2	1	0	1	326.199	651.391	651.394	-4.79	-0.00156	HCD (High Energy Collision Dissociation)	MS2	94.0103	49	4.022	7.8603	1668	SHUTSA.raw	19	22.2	24.3	23.7	31.2	118.1	144.4	0.03	0.9461	1
	Low	Unambiguous	[R].KAPAHK.[E]		1	1	c118836_g1	c118836_g1	1	2	0.2	0	1	326.198	651.389	651.394	-7.23	-0.00235	HCD (High Energy Collision Dissociation)	MS2	93.9415	68.5	4.162	7.2458	1519	SHUTSA.raw	28.7	33.1	30.3	42.8	37.8	165.7	200.3	0.05	0.9461	1
	Low	Unambiguous	[R].KAPAHK.[E]		1	1	c118836_g1	c118836_g1	1	2	0.6667	0	1	326.199	651.39	651.394	-5.16	-0.00168	HCD (High Energy Collision Dissociation)	MS2	88.5516	91.1	4.472	37.6417	9620	SHUTSA.raw	77.8	87.8	86.6	104	108.2	112.7	149.2	0.09	0.9508	1
	Low	Unambiguous	[R].KAPAHK.[E]		1	1	c118836_g1	c118836_g1	1	2	0.1667	0	1	326.199	651.391	651.394	-4.7	-0.00153	HCD (High Energy Collision Dissociation)	MS2	95.1526	105.5	3.397	54.8403	13888	SHUTSA.raw	91.2	110.8	108.8	136	122.4	111.9	160.2	0.06	0.9515	1
	Low	Rejected	[R].KAPAHK.[E]		1	1	c118836_g1	c118836_g1	1	2		0	3	326.198	651.389	651.394	-6.76	-0.0022	HCD (High Energy Collision Dissociation)	MS2	91.238	75.1	3.128	45.0611	11507	SHUTSA.raw	57.8	73	70.9	95.4	93.7	80.8	124.2	0.14	0.9525	1
	Low	Rejected	[R].KAPAHK.[E]		1	1	c118836_g1	c118836_g1	1	2		0	2	326.199	651.39	651.394	-4.88	-0.00159	HCD (High Energy Collision Dissociation)	MS2	93.4981	64.2	4.767	8.2462	1767	SHUTSA.raw	21.6	28.3	31.4	35.8	40.5	155.1	189.8	0.03	0.9536	1
	Low	Unambiguous	[R].KAPAHK.[E]		1	1	c118836_g1	c118836_g1	1	2	0.2381	0	1	326.2	651.393	651.394	-1.04	-0.00034	HCD (High Energy Collision Dissociation)	MS2	25.1409	46.7	19.262	61.6643	15497	SHUTSA.raw	18.6	49.2	29.8	66.2	64	45.8	81.2	0.21	0.9552	1
High	c17347_g1	0.178	0	2	1	1	1	1	389	40.4	5.29	0	1														Low	Low	Low	Low	Low	Low	Low
Checked	Annotated Sequence	Modifications in Master Proteins	Qvality PEP	Qvality q-value	# Protein Groups	# Proteins	# PSMs	Master Protein Accessions	Positions in Master Proteins	# Missed Cleavages	Theo. MH+ [Da]	# Razor Quan Results	Abundance Ratio: (114) / (113)	Abundance Ratio: (116) / (113)	Abundance Ratio: (117) / (113)	Abundance Ratio: (118) / (113)	Abundance Ratio: (119) / (113)	Abundances (Grouped): 113	Abundances (Grouped): 114	Abundances (Grouped): 115	Abundances (Grouped): 116	Abundances (Grouped): 117	Abundances (Grouped): 118	Abundances (Grouped): 119	Abundances (Grouped): 121	Quan Info	Found in Sample: [S98] F12: 114, Sample	Found in Sample: [S99] F12: 115, Sample	Found in Sample: [S100] F12: 116, Sample	Found in Sample: [S101] F12: 117, Sample	Found in Sample: [S102] F12: 118, Sample	Found in Sample: [S103] F12: 119, Sample	Found in Sample: [S104] F12: 121, Sample	Percolator PEP (by Search Engine): Sequest HT	XCorr (by Search Engine): Sequest HT	Sequence in Protein	Positions in Protein	Peptide Group Modifications in Protein	Quan Usage
FALSE	[R].GFDGHLLAR.[F]		1	0.844476	1	1	1	c17347_g1	c17347_g1 [279-287]	0	985.521	0														No Quan Labels	Low	Low	Low	Low	Low	Low	Not Found	1	0.58	R.GFDGHLLAR.F	[279-287]		Not Used
	Confidence	PSM Ambiguity	Annotated Sequence	Modifications	# Protein Groups	# Proteins	Master Protein Accessions	Protein Accessions	# Missed Cleavages	Charge	DeltaScore	DeltaCn	Rank	m/z [Da]	MH+ [Da]	Theo. MH+ [Da]	DeltaM [ppm]	Deltam/z [Da]	Activation Type	MS Order	Isolation Interference [%]	Average Reporter S/N	Ion Inject Time [ms]	RT [min]	First Scan	Spectrum File	Abundance: 113	Abundance: 114	Abundance: 115	Abundance: 116	Abundance: 117	Abundance: 118	Abundance: 119	XCorr	Percolator q-Value	Percolator PEP
	Low	Unambiguous	[R].GFDGHLLAR.[F]		1	1	c17347_g1	c17347_g1	0	2	0.0862	0	1	493.268	985.528	985.521	6.65	0.00328	HCD (High Energy Collision Dissociation)	MS2	0	27.2	50	32.8286	8301	SHUTSA.raw	38	25.2	48.5	22.4	14.2	36	33.3	0.58	0.8856	1
High	c78899_g2	0.184	0	1	1	2	1	1	470	51.8	6.37	0	1	2.019	1.421	0.537	0.484	1.302	0.63	108.2	218.5	153.8	58.1	52.4	140.9	68.2	Low	Low	Low	Low	Low	Low	Low
Checked	Annotated Sequence	Modifications in Master Proteins	Qvality PEP	Qvality q-value	# Protein Groups	# Proteins	# PSMs	Master Protein Accessions	Positions in Master Proteins	# Missed Cleavages	Theo. MH+ [Da]	# Razor Quan Results	Abundance Ratio: (114) / (113)	Abundance Ratio: (116) / (113)	Abundance Ratio: (117) / (113)	Abundance Ratio: (118) / (113)	Abundance Ratio: (119) / (113)	Abundances (Grouped): 113	Abundances (Grouped): 114	Abundances (Grouped): 115	Abundances (Grouped): 116	Abundances (Grouped): 117	Abundances (Grouped): 118	Abundances (Grouped): 119	Abundances (Grouped): 121	Quan Info	Found in Sample: [S98] F12: 114, Sample	Found in Sample: [S99] F12: 115, Sample	Found in Sample: [S100] F12: 116, Sample	Found in Sample: [S101] F12: 117, Sample	Found in Sample: [S102] F12: 118, Sample	Found in Sample: [S103] F12: 119, Sample	Found in Sample: [S104] F12: 121, Sample	Percolator PEP (by Search Engine): Sequest HT	XCorr (by Search Engine): Sequest HT	Sequence in Protein	Positions in Protein	Peptide Group Modifications in Protein	Quan Usage
FALSE	[K].LMAATK.[E]		1	0.855853	1	1	2	c78899_g2	c78899_g2 [145-150]	0	954.56	0	2.019	0.537	0.484	1.302	0.63	108.2	218.5	153.8	58.1	52.4	140.9	68.2			Low	Low	Low	Low	Low	Low	Not Found	1	1.21	K.LMAATK.E	[145-150]		Used
	Confidence	PSM Ambiguity	Annotated Sequence	Modifications	# Protein Groups	# Proteins	Master Protein Accessions	Protein Accessions	# Missed Cleavages	Charge	DeltaScore	DeltaCn	Rank	m/z [Da]	MH+ [Da]	Theo. MH+ [Da]	DeltaM [ppm]	Deltam/z [Da]	Activation Type	MS Order	Isolation Interference [%]	Average Reporter S/N	Ion Inject Time [ms]	RT [min]	First Scan	Spectrum File	Abundance: 113	Abundance: 114	Abundance: 115	Abundance: 116	Abundance: 117	Abundance: 118	Abundance: 119	XCorr	Percolator q-Value	Percolator PEP
	Low	Rejected	[K].lmAATK.[E]	N-Term(iTRAQ8plex); M2(Oxidation)	1	1	c78899_g2	c78899_g2	0	2		0.0169	3	477.786	954.565	954.56	5.97	0.00285	HCD (High Energy Collision Dissociation)	MS2	11.438	37.9	50	20.6716	4672	SHUTSA.raw	31	79.2	78.2	24.5	16	54.3	19.7	1.16	0.8974	1
	Low	Unambiguous	[K].lmAATK.[E]	N-Term(iTRAQ8plex); M2(Oxidation)	1	1	c78899_g2	c78899_g2	0	2	0.0661	0	1	477.785	954.562	954.56	2.45	0.00117	HCD (High Energy Collision Dissociation)	MS2	0	72.7	50	19.8433	4426	SHUTSA.raw	85.4	153.7	136.2	34.3	29.8	94.9	47.2	1.21	0.944	1
High	c26318_g1	0.138	0	3	1	1	1	1	201	22.4	9.7	0	1														Low	Low	Low	Low	Low	Low	Low
Checked	Annotated Sequence	Modifications in Master Proteins	Qvality PEP	Qvality q-value	# Protein Groups	# Proteins	# PSMs	Master Protein Accessions	Positions in Master Proteins	# Missed Cleavages	Theo. MH+ [Da]	# Razor Quan Results	Abundance Ratio: (114) / (113)	Abundance Ratio: (116) / (113)	Abundance Ratio: (117) / (113)	Abundance Ratio: (118) / (113)	Abundance Ratio: (119) / (113)	Abundances (Grouped): 113	Abundances (Grouped): 114	Abundances (Grouped): 115	Abundances (Grouped): 116	Abundances (Grouped): 117	Abundances (Grouped): 118	Abundances (Grouped): 119	Abundances (Grouped): 121	Quan Info	Found in Sample: [S98] F12: 114, Sample	Found in Sample: [S99] F12: 115, Sample	Found in Sample: [S100] F12: 116, Sample	Found in Sample: [S101] F12: 117, Sample	Found in Sample: [S102] F12: 118, Sample	Found in Sample: [S103] F12: 119, Sample	Found in Sample: [S104] F12: 121, Sample	Percolator PEP (by Search Engine): Sequest HT	XCorr (by Search Engine): Sequest HT	Sequence in Protein	Positions in Protein	Peptide Group Modifications in Protein	Quan Usage
FALSE	[K].EELFSRR.[K]		1	0.88822	1	1	1	c26318_g1	c26318_g1 [153-159]	1	936.49	0														No Quan Labels	Low	Low	Low	Low	Low	Low	Not Found	1	0.44	K.EELFSRR.K	[153-159]		Not Used
	Confidence	PSM Ambiguity	Annotated Sequence	Modifications	# Protein Groups	# Proteins	Master Protein Accessions	Protein Accessions	# Missed Cleavages	Charge	DeltaScore	DeltaCn	Rank	m/z [Da]	MH+ [Da]	Theo. MH+ [Da]	DeltaM [ppm]	Deltam/z [Da]	Activation Type	MS Order	Isolation Interference [%]	Average Reporter S/N	Ion Inject Time [ms]	RT [min]	First Scan	Spectrum File	Abundance: 113	Abundance: 114	Abundance: 115	Abundance: 116	Abundance: 117	Abundance: 118	Abundance: 119	XCorr	Percolator q-Value	Percolator PEP
	Low	Unambiguous	[K].EELFSRR.[K]		1	1	c26318_g1	c26318_g1	1	2	0.0909	0	1	468.75	936.493	936.49	3.95	0.00185	HCD (High Energy Collision Dissociation)	MS2	47.9194	111.2	50	36.3972	9280	SHUTSA.raw	379.7	81.1	186.1	68.2	55.2	39.2	80.1	0.44	0.9039	1
High	c104077_g1	0.085	0	4	1	6	1	1	259	29.7	9.29	0	1														Low	Low	Low	Low	Low	Low	Low
Checked	Annotated Sequence	Modifications in Master Proteins	Qvality PEP	Qvality q-value	# Protein Groups	# Proteins	# PSMs	Master Protein Accessions	Positions in Master Proteins	# Missed Cleavages	Theo. MH+ [Da]	# Razor Quan Results	Abundance Ratio: (114) / (113)	Abundance Ratio: (116) / (113)	Abundance Ratio: (117) / (113)	Abundance Ratio: (118) / (113)	Abundance Ratio: (119) / (113)	Abundances (Grouped): 113	Abundances (Grouped): 114	Abundances (Grouped): 115	Abundances (Grouped): 116	Abundances (Grouped): 117	Abundances (Grouped): 118	Abundances (Grouped): 119	Abundances (Grouped): 121	Quan Info	Found in Sample: [S98] F12: 114, Sample	Found in Sample: [S99] F12: 115, Sample	Found in Sample: [S100] F12: 116, Sample	Found in Sample: [S101] F12: 117, Sample	Found in Sample: [S102] F12: 118, Sample	Found in Sample: [S103] F12: 119, Sample	Found in Sample: [S104] F12: 121, Sample	Percolator PEP (by Search Engine): Sequest HT	XCorr (by Search Engine): Sequest HT	Sequence in Protein	Positions in Protein	Peptide Group Modifications in Protein	Quan Usage
FALSE	[K].LLGLLGYYRR.[Y]		1	0.844476	1	1	6	c104077_g1	c104077_g1 [177-186]	1	1223.73	0														No Quan Labels	Low	Low	Low	Low	Low	Low	Not Found	1	0.56	K.LLGLLGYYRR.Y	[177-186]		Not Used
	Confidence	PSM Ambiguity	Annotated Sequence	Modifications	# Protein Groups	# Proteins	Master Protein Accessions	Protein Accessions	# Missed Cleavages	Charge	DeltaScore	DeltaCn	Rank	m/z [Da]	MH+ [Da]	Theo. MH+ [Da]	DeltaM [ppm]	Deltam/z [Da]	Activation Type	MS Order	Isolation Interference [%]	Average Reporter S/N	Ion Inject Time [ms]	RT [min]	First Scan	Spectrum File	Abundance: 113	Abundance: 114	Abundance: 115	Abundance: 116	Abundance: 117	Abundance: 118	Abundance: 119	XCorr	Percolator q-Value	Percolator PEP
	Low	Unambiguous	[K].LLGLLGYYRR.[Y]		1	1	c104077_g1	c104077_g1	1	2	0.1071	0	1	612.367	1223.73	1223.73	0.58	0.00035	HCD (High Energy Collision Dissociation)	MS2	25.7773	5.5	50	53.4384	13568	SHUTSA.raw	9.3	6.3	11.6		4.3	7.4	4.9	0.56	0.8856	1
	Low	Unambiguous	[K].LLGLLGYYRR.[Y]		1	1	c104077_g1	c104077_g1	1	2	0.1111	0	1	612.365	1223.72	1223.73	-2.02	-0.00123	HCD (High Energy Collision Dissociation)	MS2	33.1157	8.9	50	57.7335	14573	SHUTSA.raw	14.5	7.9	17.9	7.2	5.6	10	8.2	0.45	0.8974	1
	Low	Unambiguous	[K].LLGLLGYYRR.[Y]		1	1	c104077_g1	c104077_g1	1	2	0.1489	0	1	612.365	1223.72	1223.73	-2.12	-0.00129	HCD (High Energy Collision Dissociation)	MS2	0	8.2	50	56.7645	14338	SHUTSA.raw	11.4	7.4	17.3	6.6	5.9	10.2	6.5	0.47	0.8974	1
	Low	Unambiguous	[K].LLGLLGYYRR.[Y]		1	1	c104077_g1	c104077_g1	1	2	0.1739	0	1	612.366	1223.73	1223.73	-0.62	-0.00038	HCD (High Energy Collision Dissociation)	MS2	30.0019	9.1	50	49.6926	12666	SHUTSA.raw	13	5.8	22.3	5.4	9.8	10.7	5.5	0.46	0.8974	1
	Low	Rejected	[K].LLGLLGYYRR.[Y]		1	1	c104077_g1	c104077_g1	1	2		0	2	612.364	1223.72	1223.73	-4.21	-0.00258	HCD (High Energy Collision Dissociation)	MS2	0	4.2	50	50.606	12887	SHUTSA.raw	8	4	8.9	3.1	2.8	6.7		0.44	0.91	1
	Low	Rejected	[K].LLGLLGYYRR.[Y]		1	1	c104077_g1	c104077_g1	1	2		0.0435	2	612.365	1223.72	1223.73	-2.91	-0.00178	HCD (High Energy Collision Dissociation)	MS2	30.3109	6.6	50	56.5571	14289	SHUTSA.raw	10.1	5.4	16.5	3	4.4	8.4	4.8	0.44	0.9389	1
High	c71428_g1	0.083	0	3	1	1	1	1	309	34.1	10.1	0	1														Low	Low	Low	Low	Low	Low	Low
Checked	Annotated Sequence	Modifications in Master Proteins	Qvality PEP	Qvality q-value	# Protein Groups	# Proteins	# PSMs	Master Protein Accessions	Positions in Master Proteins	# Missed Cleavages	Theo. MH+ [Da]	# Razor Quan Results	Abundance Ratio: (114) / (113)	Abundance Ratio: (116) / (113)	Abundance Ratio: (117) / (113)	Abundance Ratio: (118) / (113)	Abundance Ratio: (119) / (113)	Abundances (Grouped): 113	Abundances (Grouped): 114	Abundances (Grouped): 115	Abundances (Grouped): 116	Abundances (Grouped): 117	Abundances (Grouped): 118	Abundances (Grouped): 119	Abundances (Grouped): 121	Quan Info	Found in Sample: [S98] F12: 114, Sample	Found in Sample: [S99] F12: 115, Sample	Found in Sample: [S100] F12: 116, Sample	Found in Sample: [S101] F12: 117, Sample	Found in Sample: [S102] F12: 118, Sample	Found in Sample: [S103] F12: 119, Sample	Found in Sample: [S104] F12: 121, Sample	Percolator PEP (by Search Engine): Sequest HT	XCorr (by Search Engine): Sequest HT	Sequence in Protein	Positions in Protein	Peptide Group Modifications in Protein	Quan Usage
FALSE	[K].LKSSKLNIGK.[A]		1	0.921339	1	1	1	c71428_g1	c71428_g1 [86-95]	2	1087.68	0														No Quan Labels	Low	Low	Low	Low	Low	Low	Not Found	1	0.63	K.LKSSKLNIGK.A	[86-95]		Not Used
	Confidence	PSM Ambiguity	Annotated Sequence	Modifications	# Protein Groups	# Proteins	Master Protein Accessions	Protein Accessions	# Missed Cleavages	Charge	DeltaScore	DeltaCn	Rank	m/z [Da]	MH+ [Da]	Theo. MH+ [Da]	DeltaM [ppm]	Deltam/z [Da]	Activation Type	MS Order	Isolation Interference [%]	Average Reporter S/N	Ion Inject Time [ms]	RT [min]	First Scan	Spectrum File	Abundance: 113	Abundance: 114	Abundance: 115	Abundance: 116	Abundance: 117	Abundance: 118	Abundance: 119	XCorr	Percolator q-Value	Percolator PEP
	Low	Unambiguous	[K].LKSSKLNIGK.[A]		1	1	c71428_g1	c71428_g1	2	2	0.1746	0	1	544.342	1087.68	1087.68	-6.82	-0.00371	HCD (High Energy Collision Dissociation)	MS2	0	18.5	50	24.538	6008	SHUTSA.raw	47.2	17.3	40.6	10.5	12.3	9.5	10.3	0.63	0.9182	1
High	c107377_g1	0.121	0	13	1	2	1	1	47	6	11.03	0	1														Low	Low	Low	Low	Low	Low	Low
Checked	Annotated Sequence	Modifications in Master Proteins	Qvality PEP	Qvality q-value	# Protein Groups	# Proteins	# PSMs	Master Protein Accessions	Positions in Master Proteins	# Missed Cleavages	Theo. MH+ [Da]	# Razor Quan Results	Abundance Ratio: (114) / (113)	Abundance Ratio: (116) / (113)	Abundance Ratio: (117) / (113)	Abundance Ratio: (118) / (113)	Abundance Ratio: (119) / (113)	Abundances (Grouped): 113	Abundances (Grouped): 114	Abundances (Grouped): 115	Abundances (Grouped): 116	Abundances (Grouped): 117	Abundances (Grouped): 118	Abundances (Grouped): 119	Abundances (Grouped): 121	Quan Info	Found in Sample: [S98] F12: 114, Sample	Found in Sample: [S99] F12: 115, Sample	Found in Sample: [S100] F12: 116, Sample	Found in Sample: [S101] F12: 117, Sample	Found in Sample: [S102] F12: 118, Sample	Found in Sample: [S103] F12: 119, Sample	Found in Sample: [S104] F12: 121, Sample	Percolator PEP (by Search Engine): Sequest HT	XCorr (by Search Engine): Sequest HT	Sequence in Protein	Positions in Protein	Peptide Group Modifications in Protein	Quan Usage
FALSE	[R].QKKHTK.[K]		1	0.844476	1	1	2	c107377_g1	c107377_g1 [33-38]	2	769.468	0														No Quan Labels	Low	Low	Low	Low	Low	Low	Not Found	1	0.7	R.QKKHTK.K	[33-38]		Not Used
	Confidence	PSM Ambiguity	Annotated Sequence	Modifications	# Protein Groups	# Proteins	Master Protein Accessions	Protein Accessions	# Missed Cleavages	Charge	DeltaScore	DeltaCn	Rank	m/z [Da]	MH+ [Da]	Theo. MH+ [Da]	DeltaM [ppm]	Deltam/z [Da]	Activation Type	MS Order	Isolation Interference [%]	Average Reporter S/N	Ion Inject Time [ms]	RT [min]	First Scan	Spectrum File	Abundance: 113	Abundance: 114	Abundance: 115	Abundance: 116	Abundance: 117	Abundance: 118	Abundance: 119	XCorr	Percolator q-Value	Percolator PEP
	Low	Selected	[R].QKKHTK.[K]		1	1	c107377_g1	c107377_g1	2	2	0.0286	0	1	385.241	769.474	769.468	7.83	0.00301	HCD (High Energy Collision Dissociation)	MS2	0	13	50	33.3281	8431	SHUTSA.raw	35.8	15.4	14.6	9.5	9.3	11.1	8.4	0.7	0.8856	1
	Low	Rejected	[R].QKKHTK.[K]		1	1	c107377_g1	c107377_g1	2	2		0.0408	3	385.241	769.474	769.468	8.47	0.00326	HCD (High Energy Collision Dissociation)	MS2	18.2874	11.6	30.558	32.9599	8334	SHUTSA.raw	29.2	15.8	11.7	10.2	9.8	8.3	7.4	0.47	0.8974	1
High	c76531_g1	0.123	0	1	1	1	1	1	1001	112.1	6.76	0	1														Low	Low	Low	Low	Low	Low	Low
Checked	Annotated Sequence	Modifications in Master Proteins	Qvality PEP	Qvality q-value	# Protein Groups	# Proteins	# PSMs	Master Protein Accessions	Positions in Master Proteins	# Missed Cleavages	Theo. MH+ [Da]	# Razor Quan Results	Abundance Ratio: (114) / (113)	Abundance Ratio: (116) / (113)	Abundance Ratio: (117) / (113)	Abundance Ratio: (118) / (113)	Abundance Ratio: (119) / (113)	Abundances (Grouped): 113	Abundances (Grouped): 114	Abundances (Grouped): 115	Abundances (Grouped): 116	Abundances (Grouped): 117	Abundances (Grouped): 118	Abundances (Grouped): 119	Abundances (Grouped): 121	Quan Info	Found in Sample: [S98] F12: 114, Sample	Found in Sample: [S99] F12: 115, Sample	Found in Sample: [S100] F12: 116, Sample	Found in Sample: [S101] F12: 117, Sample	Found in Sample: [S102] F12: 118, Sample	Found in Sample: [S103] F12: 119, Sample	Found in Sample: [S104] F12: 121, Sample	Percolator PEP (by Search Engine): Sequest HT	XCorr (by Search Engine): Sequest HT	Sequence in Protein	Positions in Protein	Peptide Group Modifications in Protein	Quan Usage
FALSE	[R].GLALHKMIR.[L]		1	0.877039	1	4	1	c76531_g1	c76531_g1 [490-498]	1	1038.62	0														No Quan Labels	Low	Low	Low	Low	Low	Low	Not Found	1	0.7	R.GLALHKMIR.L	[490-498]		Not Used
	Confidence	PSM Ambiguity	Annotated Sequence	Modifications	# Protein Groups	# Proteins	Master Protein Accessions	Protein Accessions	# Missed Cleavages	Charge	DeltaScore	DeltaCn	Rank	m/z [Da]	MH+ [Da]	Theo. MH+ [Da]	DeltaM [ppm]	Deltam/z [Da]	Activation Type	MS Order	Isolation Interference [%]	Average Reporter S/N	Ion Inject Time [ms]	RT [min]	First Scan	Spectrum File	Abundance: 113	Abundance: 114	Abundance: 115	Abundance: 116	Abundance: 117	Abundance: 118	Abundance: 119	XCorr	Percolator q-Value	Percolator PEP
	Low	Unambiguous	[R].GLALHKMIR.[L]		1	4	c76531_g1	c33824_g1; c55567_g1; c76531_g1; c74775_g1	1	2	0.2429	0	1	519.818	1038.63	1038.62	5.16	0.00268	HCD (High Energy Collision Dissociation)	MS2	25.9826	17.6	50	22.7856	5419	SHUTSA.raw	30.3	19.6	23.2	19.9	13.8	19.9	14.2	0.7	0.8974	1
High	c74619_g1	0.124	0	1	1	2	1	1	1182	131.8	6.65	0	1														Low	Low	Low	Low	Low	Low	Low
Checked	Annotated Sequence	Modifications in Master Proteins	Qvality PEP	Qvality q-value	# Protein Groups	# Proteins	# PSMs	Master Protein Accessions	Positions in Master Proteins	# Missed Cleavages	Theo. MH+ [Da]	# Razor Quan Results	Abundance Ratio: (114) / (113)	Abundance Ratio: (116) / (113)	Abundance Ratio: (117) / (113)	Abundance Ratio: (118) / (113)	Abundance Ratio: (119) / (113)	Abundances (Grouped): 113	Abundances (Grouped): 114	Abundances (Grouped): 115	Abundances (Grouped): 116	Abundances (Grouped): 117	Abundances (Grouped): 118	Abundances (Grouped): 119	Abundances (Grouped): 121	Quan Info	Found in Sample: [S98] F12: 114, Sample	Found in Sample: [S99] F12: 115, Sample	Found in Sample: [S100] F12: 116, Sample	Found in Sample: [S101] F12: 117, Sample	Found in Sample: [S102] F12: 118, Sample	Found in Sample: [S103] F12: 119, Sample	Found in Sample: [S104] F12: 121, Sample	Percolator PEP (by Search Engine): Sequest HT	XCorr (by Search Engine): Sequest HT	Sequence in Protein	Positions in Protein	Peptide Group Modifications in Protein	Quan Usage
FALSE	[K].VQATKLISSK.[I]		1	0.844476	1	1	2	c74619_g1	c74619_g1 [1076-1085]	1	1074.65	0														No Quan Labels	Low	Low	Low	Low	Low	Low	Not Found	1	0.91	K.VQATKLISSK.I	[1076-1085]		Not Used
	Confidence	PSM Ambiguity	Annotated Sequence	Modifications	# Protein Groups	# Proteins	Master Protein Accessions	Protein Accessions	# Missed Cleavages	Charge	DeltaScore	DeltaCn	Rank	m/z [Da]	MH+ [Da]	Theo. MH+ [Da]	DeltaM [ppm]	Deltam/z [Da]	Activation Type	MS Order	Isolation Interference [%]	Average Reporter S/N	Ion Inject Time [ms]	RT [min]	First Scan	Spectrum File	Abundance: 113	Abundance: 114	Abundance: 115	Abundance: 116	Abundance: 117	Abundance: 118	Abundance: 119	XCorr	Percolator q-Value	Percolator PEP
	Low	Unambiguous	[K].VQATKLISSK.[I]		1	1	c74619_g1	c74619_g1	1	2	0.2088	0	1	537.833	1074.66	1074.65	6.06	0.00326	HCD (High Energy Collision Dissociation)	MS2	12.7476	34.9	50	25.206	6185	SHUTSA.raw	33.6	36.2	48.7	29.7	22.7	51.5	56.4	0.91	0.8974	1
	Low	Unambiguous	[K].VQATKLISSK.[I]		1	1	c74619_g1	c74619_g1	1	2	0.1477	0	1	537.833	1074.66	1074.65	6.63	0.00356	HCD (High Energy Collision Dissociation)	MS2	33.4166	39.2	50	24.8173	6077	SHUTSA.raw	39.5	42.3	46.4	35.6	25	51.9	72.9	0.88	0.8974	1
High	c29373_g1	0.125	0	15	1	1	1	1	47	5.4	11.72	0	1	0.969	0.782	0.585	0.637	0.977	0.759	140.1	135.8	109.6	82	89.3	136.9	106.3	Low	Low	Low	Low	Low	Low	Low
Checked	Annotated Sequence	Modifications in Master Proteins	Qvality PEP	Qvality q-value	# Protein Groups	# Proteins	# PSMs	Master Protein Accessions	Positions in Master Proteins	# Missed Cleavages	Theo. MH+ [Da]	# Razor Quan Results	Abundance Ratio: (114) / (113)	Abundance Ratio: (116) / (113)	Abundance Ratio: (117) / (113)	Abundance Ratio: (118) / (113)	Abundance Ratio: (119) / (113)	Abundances (Grouped): 113	Abundances (Grouped): 114	Abundances (Grouped): 115	Abundances (Grouped): 116	Abundances (Grouped): 117	Abundances (Grouped): 118	Abundances (Grouped): 119	Abundances (Grouped): 121	Quan Info	Found in Sample: [S98] F12: 114, Sample	Found in Sample: [S99] F12: 115, Sample	Found in Sample: [S100] F12: 116, Sample	Found in Sample: [S101] F12: 117, Sample	Found in Sample: [S102] F12: 118, Sample	Found in Sample: [S103] F12: 119, Sample	Found in Sample: [S104] F12: 121, Sample	Percolator PEP (by Search Engine): Sequest HT	XCorr (by Search Engine): Sequest HT	Sequence in Protein	Positions in Protein	Peptide Group Modifications in Protein	Quan Usage
FALSE	[-].MCARGFR.[R]		1	0.88822	1	1	1	c29373_g1	c29373_g1 [1-7]	1	1201.62	1	0.969	0.585	0.637	0.977	0.759	140.1	135.8	109.6	82	89.3	136.9	106.3			Low	Low	Low	Low	Low	Low	Not Found	1	0.68	-.MCARGFR.R	[1-7]		Used
	Confidence	PSM Ambiguity	Annotated Sequence	Modifications	# Protein Groups	# Proteins	Master Protein Accessions	Protein Accessions	# Missed Cleavages	Charge	DeltaScore	DeltaCn	Rank	m/z [Da]	MH+ [Da]	Theo. MH+ [Da]	DeltaM [ppm]	Deltam/z [Da]	Activation Type	MS Order	Isolation Interference [%]	Average Reporter S/N	Ion Inject Time [ms]	RT [min]	First Scan	Spectrum File	Abundance: 113	Abundance: 114	Abundance: 115	Abundance: 116	Abundance: 117	Abundance: 118	Abundance: 119	XCorr	Percolator q-Value	Percolator PEP
	Low	Selected	[-].mcARGFR.[R]	N-Term(iTRAQ8plex); C2(Carbamidomethyl)	1	1	c29373_g1	c29373_g1	1	2	0.0294	0	1	601.314	1201.62	1201.62	-2.92	-0.00175	HCD (High Energy Collision Dissociation)	MS2		23.6	50	35.2363	8967	SHUTSA.raw	36.8	31.8	32.3	16.1	16.9	30.7	24.5	0.68	0.9039	1
High	c68686_g1	0.126	0	2	1	1	1	1	471	54.2	4.88	0	1														Low	Low	Low	Low	Low	Low	Low
Checked	Annotated Sequence	Modifications in Master Proteins	Qvality PEP	Qvality q-value	# Protein Groups	# Proteins	# PSMs	Master Protein Accessions	Positions in Master Proteins	# Missed Cleavages	Theo. MH+ [Da]	# Razor Quan Results	Abundance Ratio: (114) / (113)	Abundance Ratio: (116) / (113)	Abundance Ratio: (117) / (113)	Abundance Ratio: (118) / (113)	Abundance Ratio: (119) / (113)	Abundances (Grouped): 113	Abundances (Grouped): 114	Abundances (Grouped): 115	Abundances (Grouped): 116	Abundances (Grouped): 117	Abundances (Grouped): 118	Abundances (Grouped): 119	Abundances (Grouped): 121	Quan Info	Found in Sample: [S98] F12: 114, Sample	Found in Sample: [S99] F12: 115, Sample	Found in Sample: [S100] F12: 116, Sample	Found in Sample: [S101] F12: 117, Sample	Found in Sample: [S102] F12: 118, Sample	Found in Sample: [S103] F12: 119, Sample	Found in Sample: [S104] F12: 121, Sample	Percolator PEP (by Search Engine): Sequest HT	XCorr (by Search Engine): Sequest HT	Sequence in Protein	Positions in Protein	Peptide Group Modifications in Protein	Quan Usage
FALSE	[R].VLMKLSNGK.[R]		1	0.916114	1	1	1	c68686_g1	c68686_g1 [389-397]	1	989.581	0														No Quan Labels	Low	Low	Low	Low	Low	Low	Low	1	0.34	R.VLMKLSNGK.R	[389-397]		Not Used
	Confidence	PSM Ambiguity	Annotated Sequence	Modifications	# Protein Groups	# Proteins	Master Protein Accessions	Protein Accessions	# Missed Cleavages	Charge	DeltaScore	DeltaCn	Rank	m/z [Da]	MH+ [Da]	Theo. MH+ [Da]	DeltaM [ppm]	Deltam/z [Da]	Activation Type	MS Order	Isolation Interference [%]	Average Reporter S/N	Ion Inject Time [ms]	RT [min]	First Scan	Spectrum File	Abundance: 113	Abundance: 114	Abundance: 115	Abundance: 116	Abundance: 117	Abundance: 118	Abundance: 119	XCorr	Percolator q-Value	Percolator PEP
	Low	Selected	[R].VLMKLSNGK.[R]		1	1	c68686_g1	c68686_g1	1	2	0	0	1	495.294	989.581	989.581	0.07	4e-05	HCD (High Energy Collision Dissociation)	MS2	0	5.6	50	8.9191	1929	SHUTSA.raw	10	4.7	5.1	3.1	3.6	6.5	6	0.34	0.9106	1
High	c123113_g1	0.127	0	13	1	1	1	1	69	7.8	10.4	0	1														Low	Low	Low	Low	Low	Low	Low
Checked	Annotated Sequence	Modifications in Master Proteins	Qvality PEP	Qvality q-value	# Protein Groups	# Proteins	# PSMs	Master Protein Accessions	Positions in Master Proteins	# Missed Cleavages	Theo. MH+ [Da]	# Razor Quan Results	Abundance Ratio: (114) / (113)	Abundance Ratio: (116) / (113)	Abundance Ratio: (117) / (113)	Abundance Ratio: (118) / (113)	Abundance Ratio: (119) / (113)	Abundances (Grouped): 113	Abundances (Grouped): 114	Abundances (Grouped): 115	Abundances (Grouped): 116	Abundances (Grouped): 117	Abundances (Grouped): 118	Abundances (Grouped): 119	Abundances (Grouped): 121	Quan Info	Found in Sample: [S98] F12: 114, Sample	Found in Sample: [S99] F12: 115, Sample	Found in Sample: [S100] F12: 116, Sample	Found in Sample: [S101] F12: 117, Sample	Found in Sample: [S102] F12: 118, Sample	Found in Sample: [S103] F12: 119, Sample	Found in Sample: [S104] F12: 121, Sample	Percolator PEP (by Search Engine): Sequest HT	XCorr (by Search Engine): Sequest HT	Sequence in Protein	Positions in Protein	Peptide Group Modifications in Protein	Quan Usage
FALSE	[R].TLQLSLVSK.[M]		1	0.855509	1	1	1	c123113_g1	c123113_g1 [28-36]	0	1292.81	0														No Quan Values	Low	Low	Low	Low	Low	Low	Not Found	1	0.39	R.TLQLSLVSK.M	[28-36]		Not Used
	Confidence	PSM Ambiguity	Annotated Sequence	Modifications	# Protein Groups	# Proteins	Master Protein Accessions	Protein Accessions	# Missed Cleavages	Charge	DeltaScore	DeltaCn	Rank	m/z [Da]	MH+ [Da]	Theo. MH+ [Da]	DeltaM [ppm]	Deltam/z [Da]	Activation Type	MS Order	Isolation Interference [%]	Average Reporter S/N	Ion Inject Time [ms]	RT [min]	First Scan	Spectrum File	Abundance: 113	Abundance: 114	Abundance: 115	Abundance: 116	Abundance: 117	Abundance: 118	Abundance: 119	XCorr	Percolator q-Value	Percolator PEP
	Low	Unambiguous	[R].TLQLSLVSk.[M]	K9(iTRAQ8plex)	1	1	c123113_g1	c123113_g1	0	2	0.1026	0	1	646.913	1292.82	1292.81	7.31	0.00472	HCD (High Energy Collision Dissociation)	MS2	0	4.9	50	17.0988	3747	SHUTSA.raw	8.3	4.9	7.2	4.1	3.7	7.3	3.5	0.39	0.8974	1
High	c56943_g2	0.129	0	3	1	1	1	1	280	31.8	6.61	0	1														Low	Low	Low	Low	Low	Low	Low
Checked	Annotated Sequence	Modifications in Master Proteins	Qvality PEP	Qvality q-value	# Protein Groups	# Proteins	# PSMs	Master Protein Accessions	Positions in Master Proteins	# Missed Cleavages	Theo. MH+ [Da]	# Razor Quan Results	Abundance Ratio: (114) / (113)	Abundance Ratio: (116) / (113)	Abundance Ratio: (117) / (113)	Abundance Ratio: (118) / (113)	Abundance Ratio: (119) / (113)	Abundances (Grouped): 113	Abundances (Grouped): 114	Abundances (Grouped): 115	Abundances (Grouped): 116	Abundances (Grouped): 117	Abundances (Grouped): 118	Abundances (Grouped): 119	Abundances (Grouped): 121	Quan Info	Found in Sample: [S98] F12: 114, Sample	Found in Sample: [S99] F12: 115, Sample	Found in Sample: [S100] F12: 116, Sample	Found in Sample: [S101] F12: 117, Sample	Found in Sample: [S102] F12: 118, Sample	Found in Sample: [S103] F12: 119, Sample	Found in Sample: [S104] F12: 121, Sample	Percolator PEP (by Search Engine): Sequest HT	XCorr (by Search Engine): Sequest HT	Sequence in Protein	Positions in Protein	Peptide Group Modifications in Protein	Quan Usage
FALSE	[R].LMVDPSTSK.[C]		1	0.926357	1	1	1	c56943_g2	c56943_g2 [60-68]	0	977.497	0														No Quan Labels	Low	Low	Low	Low	Low	Low	Not Found	1	0.42	R.LMVDPSTSK.C	[60-68]		Not Used
	Confidence	PSM Ambiguity	Annotated Sequence	Modifications	# Protein Groups	# Proteins	Master Protein Accessions	Protein Accessions	# Missed Cleavages	Charge	DeltaScore	DeltaCn	Rank	m/z [Da]	MH+ [Da]	Theo. MH+ [Da]	DeltaM [ppm]	Deltam/z [Da]	Activation Type	MS Order	Isolation Interference [%]	Average Reporter S/N	Ion Inject Time [ms]	RT [min]	First Scan	Spectrum File	Abundance: 113	Abundance: 114	Abundance: 115	Abundance: 116	Abundance: 117	Abundance: 118	Abundance: 119	XCorr	Percolator q-Value	Percolator PEP
	Low	Unambiguous	[R].LMVDPSTSK.[C]		1	1	c56943_g2	c56943_g2	0	2	0.1429	0	1	489.249	977.492	977.497	-5.71	-0.00279	HCD (High Energy Collision Dissociation)	MS2	59.4974	221.9	50	23.2592	5614	SHUTSA.raw	366.8	354.1	164.8	366.5	193.1	135	194.9	0.42	0.9301	1
High	c129899_g1	0.132	0	7	1	1	1	1	92	10.7	10.52	0	1														Low	Low	Low	Low	Low	Low	Low
Checked	Annotated Sequence	Modifications in Master Proteins	Qvality PEP	Qvality q-value	# Protein Groups	# Proteins	# PSMs	Master Protein Accessions	Positions in Master Proteins	# Missed Cleavages	Theo. MH+ [Da]	# Razor Quan Results	Abundance Ratio: (114) / (113)	Abundance Ratio: (116) / (113)	Abundance Ratio: (117) / (113)	Abundance Ratio: (118) / (113)	Abundance Ratio: (119) / (113)	Abundances (Grouped): 113	Abundances (Grouped): 114	Abundances (Grouped): 115	Abundances (Grouped): 116	Abundances (Grouped): 117	Abundances (Grouped): 118	Abundances (Grouped): 119	Abundances (Grouped): 121	Quan Info	Found in Sample: [S98] F12: 114, Sample	Found in Sample: [S99] F12: 115, Sample	Found in Sample: [S100] F12: 116, Sample	Found in Sample: [S101] F12: 117, Sample	Found in Sample: [S102] F12: 118, Sample	Found in Sample: [S103] F12: 119, Sample	Found in Sample: [S104] F12: 121, Sample	Percolator PEP (by Search Engine): Sequest HT	XCorr (by Search Engine): Sequest HT	Sequence in Protein	Positions in Protein	Peptide Group Modifications in Protein	Quan Usage
FALSE	[K].KRITQK.[H]		1	0.891176	1	1	1	c129899_g1	c129899_g1 [31-36]	2	773.499	0														No Quan Labels	Low	Low	Low	Low	Low	Low	Not Found	1	0.48	K.KRITQK.H	[31-36]		Not Used
	Confidence	PSM Ambiguity	Annotated Sequence	Modifications	# Protein Groups	# Proteins	Master Protein Accessions	Protein Accessions	# Missed Cleavages	Charge	DeltaScore	DeltaCn	Rank	m/z [Da]	MH+ [Da]	Theo. MH+ [Da]	DeltaM [ppm]	Deltam/z [Da]	Activation Type	MS Order	Isolation Interference [%]	Average Reporter S/N	Ion Inject Time [ms]	RT [min]	First Scan	Spectrum File	Abundance: 113	Abundance: 114	Abundance: 115	Abundance: 116	Abundance: 117	Abundance: 118	Abundance: 119	XCorr	Percolator q-Value	Percolator PEP
	Low	Selected	[K].KRITQK.[H]		1	1	c129899_g1	c129899_g1	2	2	0.0208	0	1	387.25	773.493	773.499	-7.9	-0.00305	HCD (High Energy Collision Dissociation)	MS2	20.3672	3.7	15.201	48.4189	12332	SHUTSA.raw	6.1	4.7	6.4	2.9	2.4	2.9	4	0.48	0.9039	1
High	c19972_g1	0.134	0	4	1	2	1	1	193	21.7	10.07	0	1														Low	Low	Low	Low	Low	Low	Low
Checked	Annotated Sequence	Modifications in Master Proteins	Qvality PEP	Qvality q-value	# Protein Groups	# Proteins	# PSMs	Master Protein Accessions	Positions in Master Proteins	# Missed Cleavages	Theo. MH+ [Da]	# Razor Quan Results	Abundance Ratio: (114) / (113)	Abundance Ratio: (116) / (113)	Abundance Ratio: (117) / (113)	Abundance Ratio: (118) / (113)	Abundance Ratio: (119) / (113)	Abundances (Grouped): 113	Abundances (Grouped): 114	Abundances (Grouped): 115	Abundances (Grouped): 116	Abundances (Grouped): 117	Abundances (Grouped): 118	Abundances (Grouped): 119	Abundances (Grouped): 121	Quan Info	Found in Sample: [S98] F12: 114, Sample	Found in Sample: [S99] F12: 115, Sample	Found in Sample: [S100] F12: 116, Sample	Found in Sample: [S101] F12: 117, Sample	Found in Sample: [S102] F12: 118, Sample	Found in Sample: [S103] F12: 119, Sample	Found in Sample: [S104] F12: 121, Sample	Percolator PEP (by Search Engine): Sequest HT	XCorr (by Search Engine): Sequest HT	Sequence in Protein	Positions in Protein	Peptide Group Modifications in Protein	Quan Usage
FALSE	[K].LGKLVGKK.[S]		1	0.844476	1	1	2	c19972_g1	c19972_g1 [120-127]	2	842.582	0														No Quan Labels	Low	Low	Low	Low	Low	Low	Not Found	1	0.22	K.LGKLVGKK.S	[120-127]		Not Used
	Confidence	PSM Ambiguity	Annotated Sequence	Modifications	# Protein Groups	# Proteins	Master Protein Accessions	Protein Accessions	# Missed Cleavages	Charge	DeltaScore	DeltaCn	Rank	m/z [Da]	MH+ [Da]	Theo. MH+ [Da]	DeltaM [ppm]	Deltam/z [Da]	Activation Type	MS Order	Isolation Interference [%]	Average Reporter S/N	Ion Inject Time [ms]	RT [min]	First Scan	Spectrum File	Abundance: 113	Abundance: 114	Abundance: 115	Abundance: 116	Abundance: 117	Abundance: 118	Abundance: 119	XCorr	Percolator q-Value	Percolator PEP
	Low	Selected	[K].LGKLVGKK.[S]		1	1	c19972_g1	c19972_g1	2	2	0	0	1	421.797	842.587	842.582	5.8	0.00244	HCD (High Energy Collision Dissociation)	MS2	0	28.2	50	47.1281	11997	SHUTSA.raw	27.2	21.2	22.2	35.9	30.4	42.2	46.7	0.2	0.8856	1
	Low	Rejected	[K].LGKLVGKK.[S]		1	1	c19972_g1	c19972_g1	2	2		0	2	421.798	842.588	842.582	7.39	0.00311	HCD (High Energy Collision Dissociation)	MS2	0	29.7	43.793	48.6151	12385	SHUTSA.raw	29.8	19.9	22.9	44.4	31.4	39.8	49.3	0.22	0.9301	1
High	c142880_g1	0.136	0	4	1	2	1	1	287	31.5	6.3	0	1														Low	Low	Low	Low	Low	Low	Low
Checked	Annotated Sequence	Modifications in Master Proteins	Qvality PEP	Qvality q-value	# Protein Groups	# Proteins	# PSMs	Master Protein Accessions	Positions in Master Proteins	# Missed Cleavages	Theo. MH+ [Da]	# Razor Quan Results	Abundance Ratio: (114) / (113)	Abundance Ratio: (116) / (113)	Abundance Ratio: (117) / (113)	Abundance Ratio: (118) / (113)	Abundance Ratio: (119) / (113)	Abundances (Grouped): 113	Abundances (Grouped): 114	Abundances (Grouped): 115	Abundances (Grouped): 116	Abundances (Grouped): 117	Abundances (Grouped): 118	Abundances (Grouped): 119	Abundances (Grouped): 121	Quan Info	Found in Sample: [S98] F12: 114, Sample	Found in Sample: [S99] F12: 115, Sample	Found in Sample: [S100] F12: 116, Sample	Found in Sample: [S101] F12: 117, Sample	Found in Sample: [S102] F12: 118, Sample	Found in Sample: [S103] F12: 119, Sample	Found in Sample: [S104] F12: 121, Sample	Percolator PEP (by Search Engine): Sequest HT	XCorr (by Search Engine): Sequest HT	Sequence in Protein	Positions in Protein	Peptide Group Modifications in Protein	Quan Usage
FALSE	[R].DLIIYALGIGSR.[D]		1	0.882781	1	1	2	c142880_g1	c142880_g1 [17-28]	0	1290.74	0														No Quan Labels	Low	Low	Low	Low	Low	Low	Not Found	1	1.05	R.DLIIYALGIGSR.D	[17-28]		Not Used
	Confidence	PSM Ambiguity	Annotated Sequence	Modifications	# Protein Groups	# Proteins	Master Protein Accessions	Protein Accessions	# Missed Cleavages	Charge	DeltaScore	DeltaCn	Rank	m/z [Da]	MH+ [Da]	Theo. MH+ [Da]	DeltaM [ppm]	Deltam/z [Da]	Activation Type	MS Order	Isolation Interference [%]	Average Reporter S/N	Ion Inject Time [ms]	RT [min]	First Scan	Spectrum File	Abundance: 113	Abundance: 114	Abundance: 115	Abundance: 116	Abundance: 117	Abundance: 118	Abundance: 119	XCorr	Percolator q-Value	Percolator PEP
	Low	Unambiguous	[R].DLIIYALGIGSR.[D]		1	1	c142880_g1	c142880_g1	0	3	0.1758	0	1	430.919	1290.74	1290.74	-0.4	-0.00017	HCD (High Energy Collision Dissociation)	MS2	44.1818	8.1	50	47.2032	12017	SHUTSA.raw	15.2	9.6	15	4.9	5.8	8	6.1	0.91	0.9015	1
	Low	Unambiguous	[R].DLIIYALGIGSR.[D]		1	1	c142880_g1	c142880_g1	0	3	0.0571	0	1	430.917	1290.74	1290.74	-4.02	-0.00173	HCD (High Energy Collision Dissociation)	MS2		11	50	48.6222	12388	SHUTSA.raw	21.2	11.8	19.3	8.9	7.5	10	9.1	1.05	0.9343	1
High	c138014_g1	0.113	0	15	1	1	1	1	92	10.7	4.32	0	1														Low	Low	Low	Low	Low	Low	Low
Checked	Annotated Sequence	Modifications in Master Proteins	Qvality PEP	Qvality q-value	# Protein Groups	# Proteins	# PSMs	Master Protein Accessions	Positions in Master Proteins	# Missed Cleavages	Theo. MH+ [Da]	# Razor Quan Results	Abundance Ratio: (114) / (113)	Abundance Ratio: (116) / (113)	Abundance Ratio: (117) / (113)	Abundance Ratio: (118) / (113)	Abundance Ratio: (119) / (113)	Abundances (Grouped): 113	Abundances (Grouped): 114	Abundances (Grouped): 115	Abundances (Grouped): 116	Abundances (Grouped): 117	Abundances (Grouped): 118	Abundances (Grouped): 119	Abundances (Grouped): 121	Quan Info	Found in Sample: [S98] F12: 114, Sample	Found in Sample: [S99] F12: 115, Sample	Found in Sample: [S100] F12: 116, Sample	Found in Sample: [S101] F12: 117, Sample	Found in Sample: [S102] F12: 118, Sample	Found in Sample: [S103] F12: 119, Sample	Found in Sample: [S104] F12: 121, Sample	Percolator PEP (by Search Engine): Sequest HT	XCorr (by Search Engine): Sequest HT	Sequence in Protein	Positions in Protein	Peptide Group Modifications in Protein	Quan Usage
FALSE	[K].AVAKLGAIAELSAK.[D]		1	0.855853	1	1	1	c138014_g1	c138014_g1 [51-64]	1	1341.81	0														No Quan Labels	Low	Low	Low	Low	Low	Low	Not Found	1	0.91	K.AVAKLGAIAELSAK.D	[51-64]		Not Used
	Confidence	PSM Ambiguity	Annotated Sequence	Modifications	# Protein Groups	# Proteins	Master Protein Accessions	Protein Accessions	# Missed Cleavages	Charge	DeltaScore	DeltaCn	Rank	m/z [Da]	MH+ [Da]	Theo. MH+ [Da]	DeltaM [ppm]	Deltam/z [Da]	Activation Type	MS Order	Isolation Interference [%]	Average Reporter S/N	Ion Inject Time [ms]	RT [min]	First Scan	Spectrum File	Abundance: 113	Abundance: 114	Abundance: 115	Abundance: 116	Abundance: 117	Abundance: 118	Abundance: 119	XCorr	Percolator q-Value	Percolator PEP
	Low	Unambiguous	[K].AVAKLGAIAELSAK.[D]		1	1	c138014_g1	c138014_g1	1	2	0.0769	0	1	671.414	1341.82	1341.81	7.79	0.00523	HCD (High Energy Collision Dissociation)	MS2	47.8011	29.2	50	5.3617	1079	SHUTSA.raw	57.8	22.3	47.4	39.5	26.9	19.2	20.2	0.91	0.8974	1
High	c124883_g1	0.112	0	7	1	1	1	1	95	10.4	8.92	0	1														Low	Low	Low	Low	Low	Low	Low
Checked	Annotated Sequence	Modifications in Master Proteins	Qvality PEP	Qvality q-value	# Protein Groups	# Proteins	# PSMs	Master Protein Accessions	Positions in Master Proteins	# Missed Cleavages	Theo. MH+ [Da]	# Razor Quan Results	Abundance Ratio: (114) / (113)	Abundance Ratio: (116) / (113)	Abundance Ratio: (117) / (113)	Abundance Ratio: (118) / (113)	Abundance Ratio: (119) / (113)	Abundances (Grouped): 113	Abundances (Grouped): 114	Abundances (Grouped): 115	Abundances (Grouped): 116	Abundances (Grouped): 117	Abundances (Grouped): 118	Abundances (Grouped): 119	Abundances (Grouped): 121	Quan Info	Found in Sample: [S98] F12: 114, Sample	Found in Sample: [S99] F12: 115, Sample	Found in Sample: [S100] F12: 116, Sample	Found in Sample: [S101] F12: 117, Sample	Found in Sample: [S102] F12: 118, Sample	Found in Sample: [S103] F12: 119, Sample	Found in Sample: [S104] F12: 121, Sample	Percolator PEP (by Search Engine): Sequest HT	XCorr (by Search Engine): Sequest HT	Sequence in Protein	Positions in Protein	Peptide Group Modifications in Protein	Quan Usage
FALSE	[-].LALQGFR.[A]		1	0.899187	1	1	1	c124883_g1	c124883_g1 [1-7]	0	804.473	0														No Quan Labels	Low	Low	Low	Low	Low	Low	Not Found	1	0.66	-.LALQGFR.A	[1-7]		Not Used
	Confidence	PSM Ambiguity	Annotated Sequence	Modifications	# Protein Groups	# Proteins	Master Protein Accessions	Protein Accessions	# Missed Cleavages	Charge	DeltaScore	DeltaCn	Rank	m/z [Da]	MH+ [Da]	Theo. MH+ [Da]	DeltaM [ppm]	Deltam/z [Da]	Activation Type	MS Order	Isolation Interference [%]	Average Reporter S/N	Ion Inject Time [ms]	RT [min]	First Scan	Spectrum File	Abundance: 113	Abundance: 114	Abundance: 115	Abundance: 116	Abundance: 117	Abundance: 118	Abundance: 119	XCorr	Percolator q-Value	Percolator PEP
	Low	Selected	[-].LALQGFR.[A]		1	1	c124883_g1	c124883_g1	0	2	0.0455	0	1	402.737	804.467	804.473	-6.76	-0.00272	HCD (High Energy Collision Dissociation)	MS2		37.4	50	23.0616	5535	SHUTSA.raw	80.3	47.9	57.8	28.4	22.2	37.7	25.1	0.66	0.9041	1
High	c28630_g1	0.096	0	3	1	1	1	1	188	23	10.67	0	1														Low	Low	Low	Low	Low	Low	Low
Checked	Annotated Sequence	Modifications in Master Proteins	Qvality PEP	Qvality q-value	# Protein Groups	# Proteins	# PSMs	Master Protein Accessions	Positions in Master Proteins	# Missed Cleavages	Theo. MH+ [Da]	# Razor Quan Results	Abundance Ratio: (114) / (113)	Abundance Ratio: (116) / (113)	Abundance Ratio: (117) / (113)	Abundance Ratio: (118) / (113)	Abundance Ratio: (119) / (113)	Abundances (Grouped): 113	Abundances (Grouped): 114	Abundances (Grouped): 115	Abundances (Grouped): 116	Abundances (Grouped): 117	Abundances (Grouped): 118	Abundances (Grouped): 119	Abundances (Grouped): 121	Quan Info	Found in Sample: [S98] F12: 114, Sample	Found in Sample: [S99] F12: 115, Sample	Found in Sample: [S100] F12: 116, Sample	Found in Sample: [S101] F12: 117, Sample	Found in Sample: [S102] F12: 118, Sample	Found in Sample: [S103] F12: 119, Sample	Found in Sample: [S104] F12: 121, Sample	Percolator PEP (by Search Engine): Sequest HT	XCorr (by Search Engine): Sequest HT	Sequence in Protein	Positions in Protein	Peptide Group Modifications in Protein	Quan Usage
FALSE	[K].KAAKFK.[E]		1	0.921339	1	1	1	c28630_g1	c28630_g1 [11-16]	2	692.445	0														No Quan Labels	Low	Low	Low	Low	Low	Low	Not Found	1	0.24	K.KAAKFK.E	[11-16]		Not Used
	Confidence	PSM Ambiguity	Annotated Sequence	Modifications	# Protein Groups	# Proteins	Master Protein Accessions	Protein Accessions	# Missed Cleavages	Charge	DeltaScore	DeltaCn	Rank	m/z [Da]	MH+ [Da]	Theo. MH+ [Da]	DeltaM [ppm]	Deltam/z [Da]	Activation Type	MS Order	Isolation Interference [%]	Average Reporter S/N	Ion Inject Time [ms]	RT [min]	First Scan	Spectrum File	Abundance: 113	Abundance: 114	Abundance: 115	Abundance: 116	Abundance: 117	Abundance: 118	Abundance: 119	XCorr	Percolator q-Value	Percolator PEP
	Low	Unambiguous	[K].KAAKFK.[E]		1	1	c28630_g1	c28630_g1	2	2	0.125	0	1	346.729	692.451	692.445	8.27	0.00286	HCD (High Energy Collision Dissociation)	MS2	52.1706	11.4	50	20.1873	4521	SHUTSA.raw	23	16.2	13.1	8.5	5.4	13.5	11.3	0.24	0.9272	1
High	c156971_g1	0.119	0	10	1	1	1	1	70	7.5	10.52	0	1														Low	Low	Low	Low	Low	Low	Low
Checked	Annotated Sequence	Modifications in Master Proteins	Qvality PEP	Qvality q-value	# Protein Groups	# Proteins	# PSMs	Master Protein Accessions	Positions in Master Proteins	# Missed Cleavages	Theo. MH+ [Da]	# Razor Quan Results	Abundance Ratio: (114) / (113)	Abundance Ratio: (116) / (113)	Abundance Ratio: (117) / (113)	Abundance Ratio: (118) / (113)	Abundance Ratio: (119) / (113)	Abundances (Grouped): 113	Abundances (Grouped): 114	Abundances (Grouped): 115	Abundances (Grouped): 116	Abundances (Grouped): 117	Abundances (Grouped): 118	Abundances (Grouped): 119	Abundances (Grouped): 121	Quan Info	Found in Sample: [S98] F12: 114, Sample	Found in Sample: [S99] F12: 115, Sample	Found in Sample: [S100] F12: 116, Sample	Found in Sample: [S101] F12: 117, Sample	Found in Sample: [S102] F12: 118, Sample	Found in Sample: [S103] F12: 119, Sample	Found in Sample: [S104] F12: 121, Sample	Percolator PEP (by Search Engine): Sequest HT	XCorr (by Search Engine): Sequest HT	Sequence in Protein	Positions in Protein	Peptide Group Modifications in Protein	Quan Usage
FALSE	[R].TAPAFWR.[R]		1	0.936562	1	1	1	c156971_g1	c156971_g1 [2-8]	0	848.441	0														No Quan Labels	Low	Low	Low	Low	Low	Low	Not Found	1	0.64	R.TAPAFWR.R	[2-8]		Not Used
	Confidence	PSM Ambiguity	Annotated Sequence	Modifications	# Protein Groups	# Proteins	Master Protein Accessions	Protein Accessions	# Missed Cleavages	Charge	DeltaScore	DeltaCn	Rank	m/z [Da]	MH+ [Da]	Theo. MH+ [Da]	DeltaM [ppm]	Deltam/z [Da]	Activation Type	MS Order	Isolation Interference [%]	Average Reporter S/N	Ion Inject Time [ms]	RT [min]	First Scan	Spectrum File	Abundance: 113	Abundance: 114	Abundance: 115	Abundance: 116	Abundance: 117	Abundance: 118	Abundance: 119	XCorr	Percolator q-Value	Percolator PEP
	Low	Unambiguous	[R].TAPAFWR.[R]		1	1	c156971_g1	c156971_g1	0	2	0.0781	0	1	424.722	848.437	848.441	-5.13	-0.00218	HCD (High Energy Collision Dissociation)	MS2	18.153	25.1	50	21.4166	4940	SHUTSA.raw	50.8	28.4	44.5	20.6	12.6	22.8	20.8	0.64	0.9461	1
High	c21372_g1	0.097	0	2	1	37	1	1	470	51.7	7.77	0	1														Low	Low	Low	Low	Low	Low	Low
Checked	Annotated Sequence	Modifications in Master Proteins	Qvality PEP	Qvality q-value	# Protein Groups	# Proteins	# PSMs	Master Protein Accessions	Positions in Master Proteins	# Missed Cleavages	Theo. MH+ [Da]	# Razor Quan Results	Abundance Ratio: (114) / (113)	Abundance Ratio: (116) / (113)	Abundance Ratio: (117) / (113)	Abundance Ratio: (118) / (113)	Abundance Ratio: (119) / (113)	Abundances (Grouped): 113	Abundances (Grouped): 114	Abundances (Grouped): 115	Abundances (Grouped): 116	Abundances (Grouped): 117	Abundances (Grouped): 118	Abundances (Grouped): 119	Abundances (Grouped): 121	Quan Info	Found in Sample: [S98] F12: 114, Sample	Found in Sample: [S99] F12: 115, Sample	Found in Sample: [S100] F12: 116, Sample	Found in Sample: [S101] F12: 117, Sample	Found in Sample: [S102] F12: 118, Sample	Found in Sample: [S103] F12: 119, Sample	Found in Sample: [S104] F12: 121, Sample	Percolator PEP (by Search Engine): Sequest HT	XCorr (by Search Engine): Sequest HT	Sequence in Protein	Positions in Protein	Peptide Group Modifications in Protein	Quan Usage
FALSE	[R].VQMSSKLAKK.[I]		1	0.846029	1	1	37	c21372_g1	c21372_g1 [416-425]	2	2032.27	0														No Quan Values	Low	Low	Low	Low	Low	Low	Not Found	1	0.37	R.VQMSSKLAKK.I	[416-425]		Not Used
	Confidence	PSM Ambiguity	Annotated Sequence	Modifications	# Protein Groups	# Proteins	Master Protein Accessions	Protein Accessions	# Missed Cleavages	Charge	DeltaScore	DeltaCn	Rank	m/z [Da]	MH+ [Da]	Theo. MH+ [Da]	DeltaM [ppm]	Deltam/z [Da]	Activation Type	MS Order	Isolation Interference [%]	Average Reporter S/N	Ion Inject Time [ms]	RT [min]	First Scan	Spectrum File	Abundance: 113	Abundance: 114	Abundance: 115	Abundance: 116	Abundance: 117	Abundance: 118	Abundance: 119	XCorr	Percolator q-Value	Percolator PEP
	Low	Selected	[R].vQMSSkLAkK.[I]	N-Term(iTRAQ8plex); K6(iTRAQ8plex); K9(iTRAQ8plex)	1	1	c21372_g1	c21372_g1	2	2	0	0	1	1016.64	2032.27	2032.27	-0.17	-0.00018	HCD (High Energy Collision Dissociation)	MS2	7.43877	41.6	50	72.1653	18250	SHUTSA.raw	47.1	44.4	54.5	48.2	41.1	46.4	50.9	0.35	0.8974	1
	Low	Rejected	[R].vQMSSkLAkK.[I]	N-Term(iTRAQ8plex); K6(iTRAQ8plex); K9(iTRAQ8plex)	1	1	c21372_g1	c21372_g1	2	2		0.04	3	1016.64	2032.27	2032.27	-1.86	-0.00189	HCD (High Energy Collision Dissociation)	MS2	36.0334	24.5	48.154	70.2911	17664	SHUTSA.raw	28.2	24.4	31.1	31.8	20.4	26.5	33.8	0.24	0.8974	1
	Low	Rejected	[R].vQMSSKLAkk.[I]	N-Term(iTRAQ8plex); K9(iTRAQ8plex); K10(iTRAQ8plex)	1	1	c21372_g1	c21372_g1	2	2		0	2	1016.64	2032.27	2032.27	-2.04	-0.00207	HCD (High Energy Collision Dissociation)	MS2	5.96493	17.7	50	72.6806	18415	SHUTSA.raw	19.2	17.5	23.1	21.8	15.3	24.8	20.3	0.25	0.8974	1
	Low	Rejected	[R].vQMSSKLAkk.[I]	N-Term(iTRAQ8plex); K9(iTRAQ8plex); K10(iTRAQ8plex)	1	1	c21372_g1	c21372_g1	2	2		0	2	1016.64	2032.27	2032.27	-1.56	-0.00158	HCD (High Energy Collision Dissociation)	MS2	7.87934	24.3	42.87	70.7986	17819	SHUTSA.raw	22	25.3	32.1	33.6	26.1	27.2	28.3	0.25	0.8974	1
	Low	Rejected	[R].vQMSSkLAkK.[I]	N-Term(iTRAQ8plex); K6(iTRAQ8plex); K9(iTRAQ8plex)	1	1	c21372_g1	c21372_g1	2	2		0	2	1016.64	2032.27	2032.27	-0.84	-0.00085	HCD (High Energy Collision Dissociation)	MS2	11.3402	21.4	50	70.9665	17871	SHUTSA.raw	22.8	22.2	28.4	25	21.4	21.1	30	0.25	0.8974	1
	Low	Rejected	[R].vQMSSkLAkK.[I]	N-Term(iTRAQ8plex); K6(iTRAQ8plex); K9(iTRAQ8plex)	1	1	c21372_g1	c21372_g1	2	2		0	2	1016.64	2032.27	2032.27	-1.92	-0.00195	HCD (High Energy Collision Dissociation)	MS2	0	35.5	50	71.4821	18034	SHUTSA.raw	37	38.2	43.3	46.9	34.3	38.4	46	0.29	0.8974	1
	Low	Rejected	[R].vQMSSkLAkK.[I]	N-Term(iTRAQ8plex); K6(iTRAQ8plex); K9(iTRAQ8plex)	1	1	c21372_g1	c21372_g1	2	2		0	2	1016.64	2032.27	2032.27	-0.59	-0.0006	HCD (High Energy Collision Dissociation)	MS2	0	20	50	71.3125	17982	SHUTSA.raw	24.1	19.2	22.9	24.4	18.4	24.5	26.9	0.36	0.8974	1
	Low	Rejected	[R].vQMSSkLAkK.[I]	N-Term(iTRAQ8plex); K6(iTRAQ8plex); K9(iTRAQ8plex)	1	1	c21372_g1	c21372_g1	2	2		0	2	1016.64	2032.27	2032.27	-1.38	-0.0014	HCD (High Energy Collision Dissociation)	MS2	6.05039	26.3	50	71.6518	18091	SHUTSA.raw	28.4	28.3	30.8	27.8	30.3	31.2	33.5	0.25	0.8974	1
	Low	Rejected	[R].vQMSSKLAkk.[I]	N-Term(iTRAQ8plex); K9(iTRAQ8plex); K10(iTRAQ8plex)	1	1	c21372_g1	c21372_g1	2	2		0	2	1016.64	2032.26	2032.27	-3.36	-0.00341	HCD (High Energy Collision Dissociation)	MS2	0	37	50	69.6036	17451	SHUTSA.raw	41.5	39.1	50.6	38.8	33.4	41.6	50.9	0.22	0.8974	1
	Low	Rejected	[R].vQMSSkLAkK.[I]	N-Term(iTRAQ8plex); K6(iTRAQ8plex); K9(iTRAQ8plex)	1	1	c21372_g1	c21372_g1	2	2		0	2	1016.64	2032.27	2032.27	-0.96	-0.00097	HCD (High Energy Collision Dissociation)	MS2	0	10.1	50	67.3704	16793	SHUTSA.raw	13.9	7.3	12.8	12.8	7.7	14.8	11.7	0.27	0.8974	1
	Low	Rejected	[R].vQMSSKLAkk.[I]	N-Term(iTRAQ8plex); K9(iTRAQ8plex); K10(iTRAQ8plex)	1	1	c21372_g1	c21372_g1	2	2		0	2	1016.64	2032.27	2032.27	-0.96	-0.00097	HCD (High Energy Collision Dissociation)	MS2	0	10.1	50	67.3704	16793	SHUTSA.raw	13.9	7.3	12.8	12.8	7.7	14.8	11.7	0.27	0.8974	1
	Low	Rejected	[R].vQMSSKLAkk.[I]	N-Term(iTRAQ8plex); K9(iTRAQ8plex); K10(iTRAQ8plex)	1	1	c21372_g1	c21372_g1	2	2		0	2	1016.64	2032.27	2032.27	-1.26	-0.00128	HCD (High Energy Collision Dissociation)	MS2	0	13.6	50	73.9088	18755	SHUTSA.raw	11.9	13.6	19	20.8	12.1	15.6	15.9	0.25	0.8974	1
	Low	Selected	[R].vQMSSkLAkK.[I]	N-Term(iTRAQ8plex); K6(iTRAQ8plex); K9(iTRAQ8plex)	1	1	c21372_g1	c21372_g1	2	2	0	0	1	1016.64	2032.27	2032.27	-1.14	-0.00115	HCD (High Energy Collision Dissociation)	MS2	4.15681	24.6	50	69.0838	17298	SHUTSA.raw	26.8	25.1	25.9	34.6	27.8	24.1	32.3	0.3	0.8974	1
	Low	Rejected	[R].vQMSSKLAkk.[I]	N-Term(iTRAQ8plex); K9(iTRAQ8plex); K10(iTRAQ8plex)	1	1	c21372_g1	c21372_g1	2	2		0	2	1016.64	2032.27	2032.27	0.79	0.0008	HCD (High Energy Collision Dissociation)	MS2	0	19.7	50	68.5725	17147	SHUTSA.raw	19.5	21.1	25.8	24.7	15.9	24.5	26.3	0.25	0.8974	1
	Low	Rejected	[R].vQMSSkLAkK.[I]	N-Term(iTRAQ8plex); K6(iTRAQ8plex); K9(iTRAQ8plex)	1	1	c21372_g1	c21372_g1	2	2		0.04	4	1016.64	2032.27	2032.27	-2.64	-0.00268	HCD (High Energy Collision Dissociation)	MS2	0	23	50	68.7426	17194	SHUTSA.raw	26.8	23.8	28.8	28.7	21.5	25.6	28.9	0.24	0.8974	1
	Low	Rejected	[R].vQMSSKLAkk.[I]	N-Term(iTRAQ8plex); K9(iTRAQ8plex); K10(iTRAQ8plex)	1	1	c21372_g1	c21372_g1	2	2		0	2	1016.64	2032.27	2032.27	-2.64	-0.00268	HCD (High Energy Collision Dissociation)	MS2	0	23	50	68.7426	17194	SHUTSA.raw	26.8	23.8	28.8	28.7	21.5	25.6	28.9	0.25	0.8974	1
	Low	Selected	[R].vQMSSKLAkk.[I]	N-Term(iTRAQ8plex); K9(iTRAQ8plex); K10(iTRAQ8plex)	1	1	c21372_g1	c21372_g1	2	2	0	0	1	1016.64	2032.27	2032.27	-1.5	-0.00152	HCD (High Energy Collision Dissociation)	MS2	0	26	50	67.8145	16928	SHUTSA.raw	29.8	23.4	33.1	30	27.7	28.7	35.1	0.25	0.8974	1
	Low	Rejected	[R].vQMSSkLAkK.[I]	N-Term(iTRAQ8plex); K6(iTRAQ8plex); K9(iTRAQ8plex)	1	1	c21372_g1	c21372_g1	2	2		0	2	1016.64	2032.27	2032.27	-1.44	-0.00146	HCD (High Energy Collision Dissociation)	MS2	10.3167	41.6	50	74.443	18918	SHUTSA.raw	43.8	48.6	52.1	47.8	39.6	48.7	52.5	0.25	0.8974	1
	Low	Rejected	[R].vQMSSkLAkK.[I]	N-Term(iTRAQ8plex); K6(iTRAQ8plex); K9(iTRAQ8plex)	1	1	c21372_g1	c21372_g1	2	2		0.04	4	1016.64	2032.27	2032.27	-1.5	-0.00152	HCD (High Energy Collision Dissociation)	MS2	0	26	50	67.8145	16928	SHUTSA.raw	29.8	23.4	33.1	30	27.7	28.7	35.1	0.24	0.8974	1
	Low	Selected	[R].vQMSSkLAkK.[I]	N-Term(iTRAQ8plex); K6(iTRAQ8plex); K9(iTRAQ8plex)	1	1	c21372_g1	c21372_g1	2	2	0	0	1	1016.64	2032.27	2032.27	-3.06	-0.00311	HCD (High Energy Collision Dissociation)	MS2	4.14289	31.2	50	69.2554	17346	SHUTSA.raw	30.2	37.7	40.5	39.7	28.7	33.3	39.7	0.36	0.8974	1
	Low	Rejected	[R].vQMSSkLAkK.[I]	N-Term(iTRAQ8plex); K6(iTRAQ8plex); K9(iTRAQ8plex)	1	1	c21372_g1	c21372_g1	2	2		0	4	1016.64	2032.27	2032.27	-1.26	-0.00128	HCD (High Energy Collision Dissociation)	MS2	0	13.6	50	73.9088	18755	SHUTSA.raw	11.9	13.6	19	20.8	12.1	15.6	15.9	0.25	0.9015	1
	Low	Selected	[R].vQMSSkLAkK.[I]	N-Term(iTRAQ8plex); K6(iTRAQ8plex); K9(iTRAQ8plex)	1	1	c21372_g1	c21372_g1	2	2	0	0	1	1016.64	2032.27	2032.27	-1.56	-0.00158	HCD (High Energy Collision Dissociation)	MS2	5.11646	24.6	50	69.7751	17500	SHUTSA.raw	25.8	23.7	36.1	27.4	26.7	28.8	28.4	0.36	0.9033	1
	Low	Rejected	[R].vQMSSkLAkK.[I]	N-Term(iTRAQ8plex); K6(iTRAQ8plex); K9(iTRAQ8plex)	1	1	c21372_g1	c21372_g1	2	2		0	2	1016.64	2032.27	2032.27	-1.56	-0.00158	HCD (High Energy Collision Dissociation)	MS2	7.87934	24.3	42.87	70.7986	17819	SHUTSA.raw	22	25.3	32.1	33.6	26.1	27.2	28.3	0.25	0.9039	1
	Low	Rejected	[R].vQMSSkLAkK.[I]	N-Term(iTRAQ8plex); K6(iTRAQ8plex); K9(iTRAQ8plex)	1	1	c21372_g1	c21372_g1	2	2		0.04	3	1016.64	2032.27	2032.27	0.79	0.0008	HCD (High Energy Collision Dissociation)	MS2	0	19.7	50	68.5725	17147	SHUTSA.raw	19.5	21.1	25.8	24.7	15.9	24.5	26.3	0.24	0.9039	1
	Low	Selected	[R].vQMSSKLAkk.[I]	N-Term(iTRAQ8plex); K9(iTRAQ8plex); K10(iTRAQ8plex)	1	1	c21372_g1	c21372_g1	2	2	0	0	1	1016.64	2032.27	2032.27	-1.98	-0.00201	HCD (High Energy Collision Dissociation)	MS2	42.9867	11.6	50	67.1949	16745	SHUTSA.raw	12.4	16.4	12.9	13.7	12.2	12.5	13.1	0.25	0.9039	1
	Low	Rejected	[R].vQMSSKLAkk.[I]	N-Term(iTRAQ8plex); K9(iTRAQ8plex); K10(iTRAQ8plex)	1	1	c21372_g1	c21372_g1	2	2		0	2	1016.64	2032.27	2032.27	-1.86	-0.00189	HCD (High Energy Collision Dissociation)	MS2	36.0334	24.5	48.154	70.2911	17664	SHUTSA.raw	28.2	24.4	31.1	31.8	20.4	26.5	33.8	0.25	0.9039	1
	Low	Rejected	[R].vQMSSkLAkK.[I]	N-Term(iTRAQ8plex); K6(iTRAQ8plex); K9(iTRAQ8plex)	1	1	c21372_g1	c21372_g1	2	2		0.04	3	1016.64	2032.27	2032.27	-2.04	-0.00207	HCD (High Energy Collision Dissociation)	MS2	5.96493	17.7	50	72.6806	18415	SHUTSA.raw	19.2	17.5	23.1	21.8	15.3	24.8	20.3	0.24	0.9041	1
	Low	Selected	[R].vQMSSkLAkK.[I]	N-Term(iTRAQ8plex); K6(iTRAQ8plex); K9(iTRAQ8plex)	1	1	c21372_g1	c21372_g1	2	2	0	0	1	1016.64	2032.27	2032.27	-0.9	-0.00091	HCD (High Energy Collision Dissociation)	MS2	13.5678	39.1	50	69.9495	17556	SHUTSA.raw	39.5	39.1	53.4	49.6	43.1	43.5	44.9	0.36	0.9041	1
	Low	Rejected	[R].vQMSSKLAkk.[I]	N-Term(iTRAQ8plex); K9(iTRAQ8plex); K10(iTRAQ8plex)	1	1	c21372_g1	c21372_g1	2	2		0	2	1016.64	2032.27	2032.27	-0.84	-0.00085	HCD (High Energy Collision Dissociation)	MS2	11.3402	21.4	50	70.9665	17871	SHUTSA.raw	22.8	22.2	28.4	25	21.4	21.1	30	0.25	0.9078	1
	Low	Selected	[R].vQMSSkLAkK.[I]	N-Term(iTRAQ8plex); K6(iTRAQ8plex); K9(iTRAQ8plex)	1	1	c21372_g1	c21372_g1	2	2	0	0	1	1016.64	2032.27	2032.27	0.55	0.00056	HCD (High Energy Collision Dissociation)	MS2	8.5118	29.9	50	68.9133	17246	SHUTSA.raw	30.3	35.8	34.9	36.1	30	31.3	40.5	0.29	0.9096	1
	Low	Selected	[R].vQMSSkLAkK.[I]	N-Term(iTRAQ8plex); K6(iTRAQ8plex); K9(iTRAQ8plex)	1	1	c21372_g1	c21372_g1	2	2	0	0	1	1016.64	2032.26	2032.27	-3.42	-0.00347	HCD (High Energy Collision Dissociation)	MS2	14.2002	26	50	69.4316	17398	SHUTSA.raw	33.9	29.8	34.5	34.3	22.5	22	30.7	0.3	0.9096	1
	Low	Selected	[R].vQMSSkLAkK.[I]	N-Term(iTRAQ8plex); K6(iTRAQ8plex); K9(iTRAQ8plex)	1	1	c21372_g1	c21372_g1	2	2	0	0	1	1016.64	2032.27	2032.27	0.19	0.00019	HCD (High Energy Collision Dissociation)	MS2		36.5	50	70.4588	17715	SHUTSA.raw	36.8	34.8	47.3	48.1	38.1	39.8	47.2	0.37	0.9146	1
	Low	Rejected	[R].vQMSSkLAkK.[I]	N-Term(iTRAQ8plex); K6(iTRAQ8plex); K9(iTRAQ8plex)	1	1	c21372_g1	c21372_g1	2	2		0	2	1016.64	2032.26	2032.27	-3.36	-0.00341	HCD (High Energy Collision Dissociation)	MS2	0	37	50	69.6036	17451	SHUTSA.raw	41.5	39.1	50.6	38.8	33.4	41.6	50.9	0.22	0.9187	1
	Low	Rejected	[R].vQMSSkLAkK.[I]	N-Term(iTRAQ8plex); K6(iTRAQ8plex); K9(iTRAQ8plex)	1	1	c21372_g1	c21372_g1	2	2		0.04	4	1016.64	2032.27	2032.27	-1.98	-0.00201	HCD (High Energy Collision Dissociation)	MS2	42.9867	11.6	50	67.1949	16745	SHUTSA.raw	12.4	16.4	12.9	13.7	12.2	12.5	13.1	0.24	0.9272	1
	Low	Selected	[R].vQMSSkLAkK.[I]	N-Term(iTRAQ8plex); K6(iTRAQ8plex); K9(iTRAQ8plex)	1	1	c21372_g1	c21372_g1	2	2	0	0	1	1016.64	2032.27	2032.27	-0.41	-0.00042	HCD (High Energy Collision Dissociation)	MS2	5.6853	28.9	50	70.1188	17611	SHUTSA.raw	35.7	31.8	39.4	31.2	27	30.6	35.7	0.35	0.9272	1
	Low	Rejected	[R].vQMSSKLAkk.[I]	N-Term(iTRAQ8plex); K9(iTRAQ8plex); K10(iTRAQ8plex)	1	1	c21372_g1	c21372_g1	2	2		0	2	1016.64	2032.27	2032.27	-1.44	-0.00146	HCD (High Energy Collision Dissociation)	MS2	10.3167	41.6	50	74.443	18918	SHUTSA.raw	43.8	48.6	52.1	47.8	39.6	48.7	52.5	0.25	0.9286	1
	Low	Rejected	[R].vQMSSKLAkk.[I]	N-Term(iTRAQ8plex); K9(iTRAQ8plex); K10(iTRAQ8plex)	1	1	c21372_g1	c21372_g1	2	2		0	2	1016.64	2032.27	2032.27	-1.38	-0.0014	HCD (High Energy Collision Dissociation)	MS2	6.05039	26.3	50	71.6518	18091	SHUTSA.raw	28.4	28.3	30.8	27.8	30.3	31.2	33.5	0.25	0.9301	1
High	c61474_g2	0.098	0	2	1	4	1	1	464	52.8	4.91	0	1														Low	Low	Low	Low	Low	Low	Low
Checked	Annotated Sequence	Modifications in Master Proteins	Qvality PEP	Qvality q-value	# Protein Groups	# Proteins	# PSMs	Master Protein Accessions	Positions in Master Proteins	# Missed Cleavages	Theo. MH+ [Da]	# Razor Quan Results	Abundance Ratio: (114) / (113)	Abundance Ratio: (116) / (113)	Abundance Ratio: (117) / (113)	Abundance Ratio: (118) / (113)	Abundance Ratio: (119) / (113)	Abundances (Grouped): 113	Abundances (Grouped): 114	Abundances (Grouped): 115	Abundances (Grouped): 116	Abundances (Grouped): 117	Abundances (Grouped): 118	Abundances (Grouped): 119	Abundances (Grouped): 121	Quan Info	Found in Sample: [S98] F12: 114, Sample	Found in Sample: [S99] F12: 115, Sample	Found in Sample: [S100] F12: 116, Sample	Found in Sample: [S101] F12: 117, Sample	Found in Sample: [S102] F12: 118, Sample	Found in Sample: [S103] F12: 119, Sample	Found in Sample: [S104] F12: 121, Sample	Percolator PEP (by Search Engine): Sequest HT	XCorr (by Search Engine): Sequest HT	Sequence in Protein	Positions in Protein	Peptide Group Modifications in Protein	Quan Usage
FALSE	[K].LTPVRALR.[A]		1	0.873348	1	1	4	c61474_g2	c61474_g2 [120-127]	1	925.594	0														No Quan Labels	Low	Low	Low	Low	Low	Low	Not Found	1	0.39	K.LTPVRALR.A	[120-127]		Not Used
	Confidence	PSM Ambiguity	Annotated Sequence	Modifications	# Protein Groups	# Proteins	Master Protein Accessions	Protein Accessions	# Missed Cleavages	Charge	DeltaScore	DeltaCn	Rank	m/z [Da]	MH+ [Da]	Theo. MH+ [Da]	DeltaM [ppm]	Deltam/z [Da]	Activation Type	MS Order	Isolation Interference [%]	Average Reporter S/N	Ion Inject Time [ms]	RT [min]	First Scan	Spectrum File	Abundance: 113	Abundance: 114	Abundance: 115	Abundance: 116	Abundance: 117	Abundance: 118	Abundance: 119	XCorr	Percolator q-Value	Percolator PEP
	Low	Rejected	[K].LTPVRALR.[A]		1	1	c61474_g2	c61474_g2	1	2		0.0357	2	463.303	925.598	925.594	4.36	0.00202	HCD (High Energy Collision Dissociation)	MS2	49.9763	125.2	31.886	30.505	7662	SHUTSA.raw	31.7	23.1	43.6	80	76	504.9	242.6	0.27	0.8974	1
	Low	Selected	[K].LTPVRALR.[A]		1	1	c61474_g2	c61474_g2	1	2	0.04	0	1	463.304	925.6	925.594	6.27	0.0029	HCD (High Energy Collision Dissociation)	MS2	21.28	168.7	50	29.5688	7415	SHUTSA.raw	29	23.7	58.4	101.7	99.1	719.7	318.3	0.25	0.8974	1
	Low	Rejected	[K].LTPVRALR.[A]		1	1	c61474_g2	c61474_g2	1	2		0	2	463.304	925.6	925.594	6.33	0.00293	HCD (High Energy Collision Dissociation)	MS2	15.3897	75.3	50	73.2734	18585	SHUTSA.raw	10.4	9.8	23	41.9	45.4	320	151.6	0.2	0.9015	1
	Low	Rejected	[K].LTPVRALR.[A]		1	1	c61474_g2	c61474_g2	1	2		0	2	463.303	925.598	925.594	4.62	0.00214	HCD (High Energy Collision Dissociation)	MS2	15.7159	121.4	36.85	54.9173	13906	SHUTSA.raw	20.1	12.5	36.1	74.4	74.8	527.4	226.1	0.39	0.9301	1
High	c142755_g1	0.101	0	2	1	2	1	1	472	52.5	8.19	0	1														Low	Low	Low	Low	Low	Low	Low
Checked	Annotated Sequence	Modifications in Master Proteins	Qvality PEP	Qvality q-value	# Protein Groups	# Proteins	# PSMs	Master Protein Accessions	Positions in Master Proteins	# Missed Cleavages	Theo. MH+ [Da]	# Razor Quan Results	Abundance Ratio: (114) / (113)	Abundance Ratio: (116) / (113)	Abundance Ratio: (117) / (113)	Abundance Ratio: (118) / (113)	Abundance Ratio: (119) / (113)	Abundances (Grouped): 113	Abundances (Grouped): 114	Abundances (Grouped): 115	Abundances (Grouped): 116	Abundances (Grouped): 117	Abundances (Grouped): 118	Abundances (Grouped): 119	Abundances (Grouped): 121	Quan Info	Found in Sample: [S98] F12: 114, Sample	Found in Sample: [S99] F12: 115, Sample	Found in Sample: [S100] F12: 116, Sample	Found in Sample: [S101] F12: 117, Sample	Found in Sample: [S102] F12: 118, Sample	Found in Sample: [S103] F12: 119, Sample	Found in Sample: [S104] F12: 121, Sample	Percolator PEP (by Search Engine): Sequest HT	XCorr (by Search Engine): Sequest HT	Sequence in Protein	Positions in Protein	Peptide Group Modifications in Protein	Quan Usage
FALSE	[R].NGVMNMNQWR.[N]		1	0.882781	1	1	2	c142755_g1	c142755_g1 [91-100]	0	1265.55	0														No Quan Labels	Low	Low	Low	Low	Low	Low	Not Found	1	0.42	R.NGVMNMNQWR.N	[91-100]		Not Used
	Confidence	PSM Ambiguity	Annotated Sequence	Modifications	# Protein Groups	# Proteins	Master Protein Accessions	Protein Accessions	# Missed Cleavages	Charge	DeltaScore	DeltaCn	Rank	m/z [Da]	MH+ [Da]	Theo. MH+ [Da]	DeltaM [ppm]	Deltam/z [Da]	Activation Type	MS Order	Isolation Interference [%]	Average Reporter S/N	Ion Inject Time [ms]	RT [min]	First Scan	Spectrum File	Abundance: 113	Abundance: 114	Abundance: 115	Abundance: 116	Abundance: 117	Abundance: 118	Abundance: 119	XCorr	Percolator q-Value	Percolator PEP
	Low	Unambiguous	[R].NGVmNMNQWR.[N]	M4(Oxidation)	1	1	c142755_g1	c142755_g1	0	2		0.0238	2	633.281	1265.55	1265.55	1.97	0.00125	HCD (High Energy Collision Dissociation)	MS2	39.9553	7.3	46.822	40.8244	10448	SHUTSA.raw	34.5	3.2	9.4	2.2	2.4	4.9	2.1	0.41	0.9015	1
	Low	Unambiguous	[R].NGVMNmNQWR.[N]	M6(Oxidation)	1	1	c142755_g1	c142755_g1	0	2	0.0238	0	1	633.281	1265.55	1265.55	1.97	0.00125	HCD (High Energy Collision Dissociation)	MS2	39.9553	7.3	46.822	40.8244	10448	SHUTSA.raw	34.5	3.2	9.4	2.2	2.4	4.9	2.1	0.42	0.9015	1
High	c77842_g2	0.101	0	3	1	1	1	1	288	32.3	6.81	0	1														Not Found	Not Found	Not Found	Not Found	Not Found	Not Found	Not Found
Checked	Annotated Sequence	Modifications in Master Proteins	Qvality PEP	Qvality q-value	# Protein Groups	# Proteins	# PSMs	Master Protein Accessions	Positions in Master Proteins	# Missed Cleavages	Theo. MH+ [Da]	# Razor Quan Results	Abundance Ratio: (114) / (113)	Abundance Ratio: (116) / (113)	Abundance Ratio: (117) / (113)	Abundance Ratio: (118) / (113)	Abundance Ratio: (119) / (113)	Abundances (Grouped): 113	Abundances (Grouped): 114	Abundances (Grouped): 115	Abundances (Grouped): 116	Abundances (Grouped): 117	Abundances (Grouped): 118	Abundances (Grouped): 119	Abundances (Grouped): 121	Quan Info	Found in Sample: [S98] F12: 114, Sample	Found in Sample: [S99] F12: 115, Sample	Found in Sample: [S100] F12: 116, Sample	Found in Sample: [S101] F12: 117, Sample	Found in Sample: [S102] F12: 118, Sample	Found in Sample: [S103] F12: 119, Sample	Found in Sample: [S104] F12: 121, Sample	Percolator PEP (by Search Engine): Sequest HT	XCorr (by Search Engine): Sequest HT	Sequence in Protein	Positions in Protein	Peptide Group Modifications in Protein	Quan Usage
FALSE	[R].MSIGKLSDK.[I]		1	0.900618	1	1	1	c77842_g2	c77842_g2 [36-44]	1	1891.14	0														No Quan Values	Not Found	Not Found	Not Found	Not Found	Not Found	Not Found	Not Found	1	0.25	R.MSIGKLSDK.I	[36-44]		Not Used
	Confidence	PSM Ambiguity	Annotated Sequence	Modifications	# Protein Groups	# Proteins	Master Protein Accessions	Protein Accessions	# Missed Cleavages	Charge	DeltaScore	DeltaCn	Rank	m/z [Da]	MH+ [Da]	Theo. MH+ [Da]	DeltaM [ppm]	Deltam/z [Da]	Activation Type	MS Order	Isolation Interference [%]	Average Reporter S/N	Ion Inject Time [ms]	RT [min]	First Scan	Spectrum File	Abundance: 113	Abundance: 114	Abundance: 115	Abundance: 116	Abundance: 117	Abundance: 118	Abundance: 119	XCorr	Percolator q-Value	Percolator PEP
	Low	Selected	[R].mSIGkLSDk.[I]	N-Term(iTRAQ8plex); K5(iTRAQ8plex); K9(iTRAQ8plex)	1	1	c77842_g2	c77842_g2	1	2	0	0	1	946.074	1891.14	1891.14	-1.8	-0.0017	HCD (High Energy Collision Dissociation)	MS2			50	47.1352	12000	SHUTSA.raw								0.25	0.9041	1
High	c52790_g1	0.103	0	4	1	1	1	1	478	52.8	8.05	0	1														Low	Low	Low	Low	Not Found	Low	Low
Checked	Annotated Sequence	Modifications in Master Proteins	Qvality PEP	Qvality q-value	# Protein Groups	# Proteins	# PSMs	Master Protein Accessions	Positions in Master Proteins	# Missed Cleavages	Theo. MH+ [Da]	# Razor Quan Results	Abundance Ratio: (114) / (113)	Abundance Ratio: (116) / (113)	Abundance Ratio: (117) / (113)	Abundance Ratio: (118) / (113)	Abundance Ratio: (119) / (113)	Abundances (Grouped): 113	Abundances (Grouped): 114	Abundances (Grouped): 115	Abundances (Grouped): 116	Abundances (Grouped): 117	Abundances (Grouped): 118	Abundances (Grouped): 119	Abundances (Grouped): 121	Quan Info	Found in Sample: [S98] F12: 114, Sample	Found in Sample: [S99] F12: 115, Sample	Found in Sample: [S100] F12: 116, Sample	Found in Sample: [S101] F12: 117, Sample	Found in Sample: [S102] F12: 118, Sample	Found in Sample: [S103] F12: 119, Sample	Found in Sample: [S104] F12: 121, Sample	Percolator PEP (by Search Engine): Sequest HT	XCorr (by Search Engine): Sequest HT	Sequence in Protein	Positions in Protein	Peptide Group Modifications in Protein	Quan Usage
FALSE	[K].SALLIGYQAITQTASRIAFGR.[L]		1	0.933368	1	1	1	c52790_g1	c52790_g1 [119-139]	1	2237.24	0														No Quan Labels	Low	Low	Low	Not Found	Low	Low	Not Found	1	0.65	K.SALLIGYQAITQTASRIAFGR.L	[119-139]		Not Used
	Confidence	PSM Ambiguity	Annotated Sequence	Modifications	# Protein Groups	# Proteins	Master Protein Accessions	Protein Accessions	# Missed Cleavages	Charge	DeltaScore	DeltaCn	Rank	m/z [Da]	MH+ [Da]	Theo. MH+ [Da]	DeltaM [ppm]	Deltam/z [Da]	Activation Type	MS Order	Isolation Interference [%]	Average Reporter S/N	Ion Inject Time [ms]	RT [min]	First Scan	Spectrum File	Abundance: 113	Abundance: 114	Abundance: 115	Abundance: 116	Abundance: 117	Abundance: 118	Abundance: 119	XCorr	Percolator q-Value	Percolator PEP
	Low	Unambiguous	[K].SALLIGYQAITQTASRIAFGR.[L]		1	1	c52790_g1	c52790_g1	1	3	0.0769	0	1	746.416	2237.23	2237.24	-2.86	-0.00213	HCD (High Energy Collision Dissociation)	MS2		4.7	50	38.113	9744	SHUTSA.raw	6.8	9.2	6.8	4		6.4	4	0.65	0.9389	1
High	c54063_g1	0.104	0	2	1	1	1	1	448	49.9	8.95	0	1														Low	Low	Low	Not Found	Low	Low	Low
Checked	Annotated Sequence	Modifications in Master Proteins	Qvality PEP	Qvality q-value	# Protein Groups	# Proteins	# PSMs	Master Protein Accessions	Positions in Master Proteins	# Missed Cleavages	Theo. MH+ [Da]	# Razor Quan Results	Abundance Ratio: (114) / (113)	Abundance Ratio: (116) / (113)	Abundance Ratio: (117) / (113)	Abundance Ratio: (118) / (113)	Abundance Ratio: (119) / (113)	Abundances (Grouped): 113	Abundances (Grouped): 114	Abundances (Grouped): 115	Abundances (Grouped): 116	Abundances (Grouped): 117	Abundances (Grouped): 118	Abundances (Grouped): 119	Abundances (Grouped): 121	Quan Info	Found in Sample: [S98] F12: 114, Sample	Found in Sample: [S99] F12: 115, Sample	Found in Sample: [S100] F12: 116, Sample	Found in Sample: [S101] F12: 117, Sample	Found in Sample: [S102] F12: 118, Sample	Found in Sample: [S103] F12: 119, Sample	Found in Sample: [S104] F12: 121, Sample	Percolator PEP (by Search Engine): Sequest HT	XCorr (by Search Engine): Sequest HT	Sequence in Protein	Positions in Protein	Peptide Group Modifications in Protein	Quan Usage
FALSE	[R].VAQMKPTR.[V]		1	0.936562	1	1	1	c54063_g1	c54063_g1 [177-184]	0	1234.72	0														No Quan Values	Low	Low	Not Found	Low	Low	Low	Not Found	1	0.45	R.VAQMKPTR.V	[177-184]		Not Used
	Confidence	PSM Ambiguity	Annotated Sequence	Modifications	# Protein Groups	# Proteins	Master Protein Accessions	Protein Accessions	# Missed Cleavages	Charge	DeltaScore	DeltaCn	Rank	m/z [Da]	MH+ [Da]	Theo. MH+ [Da]	DeltaM [ppm]	Deltam/z [Da]	Activation Type	MS Order	Isolation Interference [%]	Average Reporter S/N	Ion Inject Time [ms]	RT [min]	First Scan	Spectrum File	Abundance: 113	Abundance: 114	Abundance: 115	Abundance: 116	Abundance: 117	Abundance: 118	Abundance: 119	XCorr	Percolator q-Value	Percolator PEP
	Low	Unambiguous	[R].vAQMKPTR.[V]	N-Term(iTRAQ8plex)	1	1	c54063_g1	c54063_g1	0	2	0.0667	0	1	617.862	1234.72	1234.72	-6.83	-0.00422	HCD (High Energy Collision Dissociation)	MS2	31.4678	4.5	50	61.0348	15350	SHUTSA.raw	13.4	5.6	7.1		3.2	2.3	4.5	0.45	0.9461	1
High	c163874_g1	0.105	0	19	1	2	1	1	32	3.9	7.25	0	1														Low	Low	Low	Low	Low	Low	Low
Checked	Annotated Sequence	Modifications in Master Proteins	Qvality PEP	Qvality q-value	# Protein Groups	# Proteins	# PSMs	Master Protein Accessions	Positions in Master Proteins	# Missed Cleavages	Theo. MH+ [Da]	# Razor Quan Results	Abundance Ratio: (114) / (113)	Abundance Ratio: (116) / (113)	Abundance Ratio: (117) / (113)	Abundance Ratio: (118) / (113)	Abundance Ratio: (119) / (113)	Abundances (Grouped): 113	Abundances (Grouped): 114	Abundances (Grouped): 115	Abundances (Grouped): 116	Abundances (Grouped): 117	Abundances (Grouped): 118	Abundances (Grouped): 119	Abundances (Grouped): 121	Quan Info	Found in Sample: [S98] F12: 114, Sample	Found in Sample: [S99] F12: 115, Sample	Found in Sample: [S100] F12: 116, Sample	Found in Sample: [S101] F12: 117, Sample	Found in Sample: [S102] F12: 118, Sample	Found in Sample: [S103] F12: 119, Sample	Found in Sample: [S104] F12: 121, Sample	Percolator PEP (by Search Engine): Sequest HT	XCorr (by Search Engine): Sequest HT	Sequence in Protein	Positions in Protein	Peptide Group Modifications in Protein	Quan Usage
FALSE	[K].GFIRDP.[-]		1	0.855853	1	1	2	c163874_g1	c163874_g1 [27-32]	1	704.373	0														No Quan Labels	Low	Low	Low	Low	Low	Low	Not Found	1	0.74	K.GFIRDP.-	[27-32]		Not Used
	Confidence	PSM Ambiguity	Annotated Sequence	Modifications	# Protein Groups	# Proteins	Master Protein Accessions	Protein Accessions	# Missed Cleavages	Charge	DeltaScore	DeltaCn	Rank	m/z [Da]	MH+ [Da]	Theo. MH+ [Da]	DeltaM [ppm]	Deltam/z [Da]	Activation Type	MS Order	Isolation Interference [%]	Average Reporter S/N	Ion Inject Time [ms]	RT [min]	First Scan	Spectrum File	Abundance: 113	Abundance: 114	Abundance: 115	Abundance: 116	Abundance: 117	Abundance: 118	Abundance: 119	XCorr	Percolator q-Value	Percolator PEP
	Low	Unambiguous	[K].GFIRDP.[-]		1	1	c163874_g1	c163874_g1	1	2	0.0676	0	1	352.691	704.375	704.373	3.04	0.00107	HCD (High Energy Collision Dissociation)	MS2	56.3127	24	12.336	34.9576	8881	SHUTSA.raw	49.8	20.8	27.6	33.5	13.5	33.7	12.9	0.74	0.8974	1
	Low	Unambiguous	[K].GFIRDP.[-]		1	1	c163874_g1	c163874_g1	1	2	0.0615	0	1	352.693	704.379	704.373	9.54	0.00336	HCD (High Energy Collision Dissociation)	MS2	81.2271	24.3	13.675	35.1293	8933	SHUTSA.raw	44.3	27.4	37.4	34.5	11.9	27.6	11.5	0.65	0.8974	1
High	c35274_g1	0.11	0	3	1	2	1	1	224	24.5	7.11	0	1														Low	Low	Low	Low	Low	Low	Low
Checked	Annotated Sequence	Modifications in Master Proteins	Qvality PEP	Qvality q-value	# Protein Groups	# Proteins	# PSMs	Master Protein Accessions	Positions in Master Proteins	# Missed Cleavages	Theo. MH+ [Da]	# Razor Quan Results	Abundance Ratio: (114) / (113)	Abundance Ratio: (116) / (113)	Abundance Ratio: (117) / (113)	Abundance Ratio: (118) / (113)	Abundance Ratio: (119) / (113)	Abundances (Grouped): 113	Abundances (Grouped): 114	Abundances (Grouped): 115	Abundances (Grouped): 116	Abundances (Grouped): 117	Abundances (Grouped): 118	Abundances (Grouped): 119	Abundances (Grouped): 121	Quan Info	Found in Sample: [S98] F12: 114, Sample	Found in Sample: [S99] F12: 115, Sample	Found in Sample: [S100] F12: 116, Sample	Found in Sample: [S101] F12: 117, Sample	Found in Sample: [S102] F12: 118, Sample	Found in Sample: [S103] F12: 119, Sample	Found in Sample: [S104] F12: 121, Sample	Percolator PEP (by Search Engine): Sequest HT	XCorr (by Search Engine): Sequest HT	Sequence in Protein	Positions in Protein	Peptide Group Modifications in Protein	Quan Usage
FALSE	[K].TGMFSGK.[K]		1	0.846029	1	1	2	c35274_g1	c35274_g1 [199-205]	0	727.344	0														No Quan Labels	Low	Low	Low	Low	Low	Low	Not Found	1	0.49	K.TGMFSGK.K	[199-205]		Not Used
	Confidence	PSM Ambiguity	Annotated Sequence	Modifications	# Protein Groups	# Proteins	Master Protein Accessions	Protein Accessions	# Missed Cleavages	Charge	DeltaScore	DeltaCn	Rank	m/z [Da]	MH+ [Da]	Theo. MH+ [Da]	DeltaM [ppm]	Deltam/z [Da]	Activation Type	MS Order	Isolation Interference [%]	Average Reporter S/N	Ion Inject Time [ms]	RT [min]	First Scan	Spectrum File	Abundance: 113	Abundance: 114	Abundance: 115	Abundance: 116	Abundance: 117	Abundance: 118	Abundance: 119	XCorr	Percolator q-Value	Percolator PEP
	Low	Unambiguous	[K].TGMFSGK.[K]		1	1	c35274_g1	c35274_g1	0	2	0.0612	0	1	364.176	727.345	727.344	1.27	0.00046	HCD (High Energy Collision Dissociation)	MS2	25.4724	91.5	15.754	21.1441	4841	SHUTSA.raw	72	117.5	288.6	82	47.4	58.7	66	0.49	0.8974	1
	Low	Unambiguous	[K].TGMFSGK.[K]		1	1	c35274_g1	c35274_g1	0	2	0.1081	0	1	364.176	727.344	727.344	0.1	4e-05	HCD (High Energy Collision Dissociation)	MS2	37.1657	100.7	17.017	23.2324	5602	SHUTSA.raw	87.2	132	298.5	81.1	63.9	67.7	74.9	0.37	0.8974	1
High	c52678_g1	0.11	0	2	1	1	1	1	335	37.5	6.7	0	1														Low	Low	Low	Low	Low	Low	Not Found
Checked	Annotated Sequence	Modifications in Master Proteins	Qvality PEP	Qvality q-value	# Protein Groups	# Proteins	# PSMs	Master Protein Accessions	Positions in Master Proteins	# Missed Cleavages	Theo. MH+ [Da]	# Razor Quan Results	Abundance Ratio: (114) / (113)	Abundance Ratio: (116) / (113)	Abundance Ratio: (117) / (113)	Abundance Ratio: (118) / (113)	Abundance Ratio: (119) / (113)	Abundances (Grouped): 113	Abundances (Grouped): 114	Abundances (Grouped): 115	Abundances (Grouped): 116	Abundances (Grouped): 117	Abundances (Grouped): 118	Abundances (Grouped): 119	Abundances (Grouped): 121	Quan Info	Found in Sample: [S98] F12: 114, Sample	Found in Sample: [S99] F12: 115, Sample	Found in Sample: [S100] F12: 116, Sample	Found in Sample: [S101] F12: 117, Sample	Found in Sample: [S102] F12: 118, Sample	Found in Sample: [S103] F12: 119, Sample	Found in Sample: [S104] F12: 121, Sample	Percolator PEP (by Search Engine): Sequest HT	XCorr (by Search Engine): Sequest HT	Sequence in Protein	Positions in Protein	Peptide Group Modifications in Protein	Quan Usage
FALSE	[K].KDEKENIK.[R]		1	0.882781	1	1	1	c52678_g1	c52678_g1 [30-37]	2	1003.54	0														No Quan Labels	Low	Low	Low	Low	Low	Not Found	Not Found	1	0.5	K.KDEKENIK.R	[30-37]		Not Used
	Confidence	PSM Ambiguity	Annotated Sequence	Modifications	# Protein Groups	# Proteins	Master Protein Accessions	Protein Accessions	# Missed Cleavages	Charge	DeltaScore	DeltaCn	Rank	m/z [Da]	MH+ [Da]	Theo. MH+ [Da]	DeltaM [ppm]	Deltam/z [Da]	Activation Type	MS Order	Isolation Interference [%]	Average Reporter S/N	Ion Inject Time [ms]	RT [min]	First Scan	Spectrum File	Abundance: 113	Abundance: 114	Abundance: 115	Abundance: 116	Abundance: 117	Abundance: 118	Abundance: 119	XCorr	Percolator q-Value	Percolator PEP
	Low	Unambiguous	[K].KDEKENIK.[R]		1	1	c52678_g1	c52678_g1	2	2	0.22	0	1	502.276	1003.54	1003.54	2.01	0.00101	HCD (High Energy Collision Dissociation)	MS2	29.4904	2.7	50	8.6956	1877	SHUTSA.raw	7	2.5	3.7	2.5	3	2.9		0.5	0.9015	1
High	c88203_g1	0.044	0	33	1	1	1	1	39	4.3	10.29	0	1														Low	Low	Low	Low	Low	Low	Low
Checked	Annotated Sequence	Modifications in Master Proteins	Qvality PEP	Qvality q-value	# Protein Groups	# Proteins	# PSMs	Master Protein Accessions	Positions in Master Proteins	# Missed Cleavages	Theo. MH+ [Da]	# Razor Quan Results	Abundance Ratio: (114) / (113)	Abundance Ratio: (116) / (113)	Abundance Ratio: (117) / (113)	Abundance Ratio: (118) / (113)	Abundance Ratio: (119) / (113)	Abundances (Grouped): 113	Abundances (Grouped): 114	Abundances (Grouped): 115	Abundances (Grouped): 116	Abundances (Grouped): 117	Abundances (Grouped): 118	Abundances (Grouped): 119	Abundances (Grouped): 121	Quan Info	Found in Sample: [S98] F12: 114, Sample	Found in Sample: [S99] F12: 115, Sample	Found in Sample: [S100] F12: 116, Sample	Found in Sample: [S101] F12: 117, Sample	Found in Sample: [S102] F12: 118, Sample	Found in Sample: [S103] F12: 119, Sample	Found in Sample: [S104] F12: 121, Sample	Percolator PEP (by Search Engine): Sequest HT	XCorr (by Search Engine): Sequest HT	Sequence in Protein	Positions in Protein	Peptide Group Modifications in Protein	Quan Usage
FALSE	[K].LASGLPGSNTRHR.[W]		1	0.846029	1	1	1	c88203_g1	c88203_g1 [12-24]	1	1365.73	0														No Quan Labels	Low	Low	Low	Low	Low	Low	Not Found	1	0.66	K.LASGLPGSNTRHR.W	[12-24]		Not Used
	Confidence	PSM Ambiguity	Annotated Sequence	Modifications	# Protein Groups	# Proteins	Master Protein Accessions	Protein Accessions	# Missed Cleavages	Charge	DeltaScore	DeltaCn	Rank	m/z [Da]	MH+ [Da]	Theo. MH+ [Da]	DeltaM [ppm]	Deltam/z [Da]	Activation Type	MS Order	Isolation Interference [%]	Average Reporter S/N	Ion Inject Time [ms]	RT [min]	First Scan	Spectrum File	Abundance: 113	Abundance: 114	Abundance: 115	Abundance: 116	Abundance: 117	Abundance: 118	Abundance: 119	XCorr	Percolator q-Value	Percolator PEP
	Low	Selected	[K].LASGLPGSNTRHR.[W]		1	1	c88203_g1	c88203_g1	1	2	0.0455	0	1	683.369	1365.73	1365.73	-3.15	-0.00215	HCD (High Energy Collision Dissociation)	MS2	34.0429	22.5	50	20.9962	4790	SHUTSA.raw	12.3	63	61.8	10.8	7.5	10.6	14	0.66	0.8974	1
High	c84945_g1	0.036	0	3	1	2	1	1	373	40.9	8.54	0	1														Low	Low	Low	Low	Low	Low	Low
Checked	Annotated Sequence	Modifications in Master Proteins	Qvality PEP	Qvality q-value	# Protein Groups	# Proteins	# PSMs	Master Protein Accessions	Positions in Master Proteins	# Missed Cleavages	Theo. MH+ [Da]	# Razor Quan Results	Abundance Ratio: (114) / (113)	Abundance Ratio: (116) / (113)	Abundance Ratio: (117) / (113)	Abundance Ratio: (118) / (113)	Abundance Ratio: (119) / (113)	Abundances (Grouped): 113	Abundances (Grouped): 114	Abundances (Grouped): 115	Abundances (Grouped): 116	Abundances (Grouped): 117	Abundances (Grouped): 118	Abundances (Grouped): 119	Abundances (Grouped): 121	Quan Info	Found in Sample: [S98] F12: 114, Sample	Found in Sample: [S99] F12: 115, Sample	Found in Sample: [S100] F12: 116, Sample	Found in Sample: [S101] F12: 117, Sample	Found in Sample: [S102] F12: 118, Sample	Found in Sample: [S103] F12: 119, Sample	Found in Sample: [S104] F12: 121, Sample	Percolator PEP (by Search Engine): Sequest HT	XCorr (by Search Engine): Sequest HT	Sequence in Protein	Positions in Protein	Peptide Group Modifications in Protein	Quan Usage
FALSE	[K].EIITARQQNAK.[M]		1	0.882781	1	1	2	c84945_g1	c84945_g1 [128-138]	1	1271.71	0														No Quan Labels	Low	Low	Low	Low	Low	Low	Not Found	1	0.99	K.EIITARQQNAK.M	[128-138]		Not Used
	Confidence	PSM Ambiguity	Annotated Sequence	Modifications	# Protein Groups	# Proteins	Master Protein Accessions	Protein Accessions	# Missed Cleavages	Charge	DeltaScore	DeltaCn	Rank	m/z [Da]	MH+ [Da]	Theo. MH+ [Da]	DeltaM [ppm]	Deltam/z [Da]	Activation Type	MS Order	Isolation Interference [%]	Average Reporter S/N	Ion Inject Time [ms]	RT [min]	First Scan	Spectrum File	Abundance: 113	Abundance: 114	Abundance: 115	Abundance: 116	Abundance: 117	Abundance: 118	Abundance: 119	XCorr	Percolator q-Value	Percolator PEP
	Low	Unambiguous	[K].EIITARQQNAK.[M]		1	1	c84945_g1	c84945_g1	1	2	0.2809	0	1	636.361	1271.71	1271.71	6.31	0.00401	HCD (High Energy Collision Dissociation)	MS2	27.8544	6.9	50	67.2574	16762	SHUTSA.raw	11.2	5.5	9.8	7.9	4.4	10.4	6.4	0.89	0.9015	1
	Low	Unambiguous	[K].EIITARQQNAK.[M]		1	1	c84945_g1	c84945_g1	1	2	0.3838	0	1	636.361	1271.72	1271.71	6.69	0.00426	HCD (High Energy Collision Dissociation)	MS2		3.3	50	66.8711	16655	SHUTSA.raw	4.3	3.1	4.2	3.4	2.8	5	3.7	0.99	0.9291	1
High	c61377_g1	0.024	0	2	1	1	1	1	608	67.3	5.48	0	1														Low	Low	Low	Low	Low	Low	Low
Checked	Annotated Sequence	Modifications in Master Proteins	Qvality PEP	Qvality q-value	# Protein Groups	# Proteins	# PSMs	Master Protein Accessions	Positions in Master Proteins	# Missed Cleavages	Theo. MH+ [Da]	# Razor Quan Results	Abundance Ratio: (114) / (113)	Abundance Ratio: (116) / (113)	Abundance Ratio: (117) / (113)	Abundance Ratio: (118) / (113)	Abundance Ratio: (119) / (113)	Abundances (Grouped): 113	Abundances (Grouped): 114	Abundances (Grouped): 115	Abundances (Grouped): 116	Abundances (Grouped): 117	Abundances (Grouped): 118	Abundances (Grouped): 119	Abundances (Grouped): 121	Quan Info	Found in Sample: [S98] F12: 114, Sample	Found in Sample: [S99] F12: 115, Sample	Found in Sample: [S100] F12: 116, Sample	Found in Sample: [S101] F12: 117, Sample	Found in Sample: [S102] F12: 118, Sample	Found in Sample: [S103] F12: 119, Sample	Found in Sample: [S104] F12: 121, Sample	Percolator PEP (by Search Engine): Sequest HT	XCorr (by Search Engine): Sequest HT	Sequence in Protein	Positions in Protein	Peptide Group Modifications in Protein	Quan Usage
FALSE	[K].IVEKLVERVLNK.[T]		1	0.921339	1	1	1	c61377_g1	c61377_g1 [153-164]	2	2048.31	0														No Quan Values	Low	Low	Low	Low	Low	Low	Not Found	1	0.24	K.IVEKLVERVLNK.T	[153-164]		Not Used
	Confidence	PSM Ambiguity	Annotated Sequence	Modifications	# Protein Groups	# Proteins	Master Protein Accessions	Protein Accessions	# Missed Cleavages	Charge	DeltaScore	DeltaCn	Rank	m/z [Da]	MH+ [Da]	Theo. MH+ [Da]	DeltaM [ppm]	Deltam/z [Da]	Activation Type	MS Order	Isolation Interference [%]	Average Reporter S/N	Ion Inject Time [ms]	RT [min]	First Scan	Spectrum File	Abundance: 113	Abundance: 114	Abundance: 115	Abundance: 116	Abundance: 117	Abundance: 118	Abundance: 119	XCorr	Percolator q-Value	Percolator PEP
	Low	Unambiguous	[K].iVEkLVERVLNK.[T]	N-Term(iTRAQ8plex); K4(iTRAQ8plex)	1	1	c61377_g1	c61377_g1	2	2	0.5	0	1	1024.65	2048.3	2048.31	-3.78	-0.00387	HCD (High Energy Collision Dissociation)	MS2	39.7372	4.8	50	70.594	17755	SHUTSA.raw	4.7	5.2	5.8	6.6	4.4	5.8	5.7	0.24	0.9272	1
High	c68400_g1	0.036	0	2	2	3	2	1	805	90.7	8.32	0	2														Low	Low	Low	Low	Low	Low	Low
Checked	Annotated Sequence	Modifications in Master Proteins	Qvality PEP	Qvality q-value	# Protein Groups	# Proteins	# PSMs	Master Protein Accessions	Positions in Master Proteins	# Missed Cleavages	Theo. MH+ [Da]	# Razor Quan Results	Abundance Ratio: (114) / (113)	Abundance Ratio: (116) / (113)	Abundance Ratio: (117) / (113)	Abundance Ratio: (118) / (113)	Abundance Ratio: (119) / (113)	Abundances (Grouped): 113	Abundances (Grouped): 114	Abundances (Grouped): 115	Abundances (Grouped): 116	Abundances (Grouped): 117	Abundances (Grouped): 118	Abundances (Grouped): 119	Abundances (Grouped): 121	Quan Info	Found in Sample: [S98] F12: 114, Sample	Found in Sample: [S99] F12: 115, Sample	Found in Sample: [S100] F12: 116, Sample	Found in Sample: [S101] F12: 117, Sample	Found in Sample: [S102] F12: 118, Sample	Found in Sample: [S103] F12: 119, Sample	Found in Sample: [S104] F12: 121, Sample	Percolator PEP (by Search Engine): Sequest HT	XCorr (by Search Engine): Sequest HT	Sequence in Protein	Positions in Protein	Peptide Group Modifications in Protein	Quan Usage
FALSE	[K].NLPSALR.[T]		1	0.926357	1	1	2	c68400_g1	c68400_g1 [165-171]	0	1074.66	0														No Quan Values	Low	Low	Low	Not Found	Low	Low	Not Found	1	0.53	K.NLPSALR.T	[165-171]		Not Used
	Confidence	PSM Ambiguity	Annotated Sequence	Modifications	# Protein Groups	# Proteins	Master Protein Accessions	Protein Accessions	# Missed Cleavages	Charge	DeltaScore	DeltaCn	Rank	m/z [Da]	MH+ [Da]	Theo. MH+ [Da]	DeltaM [ppm]	Deltam/z [Da]	Activation Type	MS Order	Isolation Interference [%]	Average Reporter S/N	Ion Inject Time [ms]	RT [min]	First Scan	Spectrum File	Abundance: 113	Abundance: 114	Abundance: 115	Abundance: 116	Abundance: 117	Abundance: 118	Abundance: 119	XCorr	Percolator q-Value	Percolator PEP
	Low	Rejected	[K].nLPSALR.[T]	N-Term(iTRAQ8plex)	1	1	c68400_g1	c68400_g1	0	2		0	4	537.835	1074.66	1074.66	4.54	0.00244	HCD (High Energy Collision Dissociation)	MS2	6.53271	7.6	18.501	32.0255	8090	SHUTSA.raw	18.3	8.9	12	5.2		10.4	5.8	0.53	0.9301	1
	Low	Rejected	[K].nLPSALR.[T]	N-Term(iTRAQ8plex)	1	1	c68400_g1	c68400_g1	0	2		0.02	4	537.835	1074.66	1074.66	4.32	0.00232	HCD (High Energy Collision Dissociation)	MS2	7.80965	1.4	4.52	31.3433	7896	SHUTSA.raw	3.2		2.4	2.5		3.2		0.49	0.9552	1
FALSE	[K].DSKIGSVDIKIR.[S]		1	0.933368	1	1	1	c68400_g1	c68400_g1 [404-415]	2	1330.77	0														No Quan Labels	Low	Low	Low	Low	Low	Low	Not Found	1	0.54	K.DSKIGSVDIKIR.S	[404-415]		Not Used
	Confidence	PSM Ambiguity	Annotated Sequence	Modifications	# Protein Groups	# Proteins	Master Protein Accessions	Protein Accessions	# Missed Cleavages	Charge	DeltaScore	DeltaCn	Rank	m/z [Da]	MH+ [Da]	Theo. MH+ [Da]	DeltaM [ppm]	Deltam/z [Da]	Activation Type	MS Order	Isolation Interference [%]	Average Reporter S/N	Ion Inject Time [ms]	RT [min]	First Scan	Spectrum File	Abundance: 113	Abundance: 114	Abundance: 115	Abundance: 116	Abundance: 117	Abundance: 118	Abundance: 119	XCorr	Percolator q-Value	Percolator PEP
	Low	Selected	[K].DSKIGSVDIKIR.[S]		1	1	c68400_g1	c68400_g1	2	3		0.0357	3	444.263	1330.77	1330.77	3.49	0.00155	HCD (High Energy Collision Dissociation)	MS2	0	7.1	50	43.8679	11211	SHUTSA.raw	6.6	4.7	6.6	11.6	9.6	10.9	6.8	0.54	0.9389	1
High	c183854_g1	0.022	0	1	1	2	1	1	927	102.8	7.06	0	1														Low	Low	Low	Low	Low	Low	Low
Checked	Annotated Sequence	Modifications in Master Proteins	Qvality PEP	Qvality q-value	# Protein Groups	# Proteins	# PSMs	Master Protein Accessions	Positions in Master Proteins	# Missed Cleavages	Theo. MH+ [Da]	# Razor Quan Results	Abundance Ratio: (114) / (113)	Abundance Ratio: (116) / (113)	Abundance Ratio: (117) / (113)	Abundance Ratio: (118) / (113)	Abundance Ratio: (119) / (113)	Abundances (Grouped): 113	Abundances (Grouped): 114	Abundances (Grouped): 115	Abundances (Grouped): 116	Abundances (Grouped): 117	Abundances (Grouped): 118	Abundances (Grouped): 119	Abundances (Grouped): 121	Quan Info	Found in Sample: [S98] F12: 114, Sample	Found in Sample: [S99] F12: 115, Sample	Found in Sample: [S100] F12: 116, Sample	Found in Sample: [S101] F12: 117, Sample	Found in Sample: [S102] F12: 118, Sample	Found in Sample: [S103] F12: 119, Sample	Found in Sample: [S104] F12: 121, Sample	Percolator PEP (by Search Engine): Sequest HT	XCorr (by Search Engine): Sequest HT	Sequence in Protein	Positions in Protein	Peptide Group Modifications in Protein	Quan Usage
FALSE	[K].VHLGVIR.[I]		1	0.859043	1	1	2	c183854_g1	c183854_g1 [366-372]	0	793.504	0														No Quan Labels	Low	Low	Low	Low	Low	Low	Low	1	0.3	K.VHLGVIR.I	[366-372]		Not Used
	Confidence	PSM Ambiguity	Annotated Sequence	Modifications	# Protein Groups	# Proteins	Master Protein Accessions	Protein Accessions	# Missed Cleavages	Charge	DeltaScore	DeltaCn	Rank	m/z [Da]	MH+ [Da]	Theo. MH+ [Da]	DeltaM [ppm]	Deltam/z [Da]	Activation Type	MS Order	Isolation Interference [%]	Average Reporter S/N	Ion Inject Time [ms]	RT [min]	First Scan	Spectrum File	Abundance: 113	Abundance: 114	Abundance: 115	Abundance: 116	Abundance: 117	Abundance: 118	Abundance: 119	XCorr	Percolator q-Value	Percolator PEP
	Low	Unambiguous	[K].VHLGVIR.[I]		1	1	c183854_g1	c183854_g1	0	2	0.4333	0	1	397.255	793.503	793.504	-1.72	-0.00068	HCD (High Energy Collision Dissociation)	MS2	0	180.6	36.072	31.719	8003	SHUTSA.raw	192.1	228.9	244.7	193	175.9	207.9	198.3	0.3	0.8974	1
	Low	Unambiguous	[K].VHLGVIR.[I]		1	1	c183854_g1	c183854_g1	0	2	0.4	0	1	397.254	793.501	793.504	-3.88	-0.00154	HCD (High Energy Collision Dissociation)	MS2	54.6169	151.2	26.369	37.5945	9607	SHUTSA.raw	154.3	189.2	198.1	155.1	148.4	188.5	176.3	0.25	0.9536	1
High	c53437_g1	0.098	0	8	2	8	2	1	303	33.4	5.07	0	2														Low	Low	Low	Low	Low	Low	Low
Checked	Annotated Sequence	Modifications in Master Proteins	Qvality PEP	Qvality q-value	# Protein Groups	# Proteins	# PSMs	Master Protein Accessions	Positions in Master Proteins	# Missed Cleavages	Theo. MH+ [Da]	# Razor Quan Results	Abundance Ratio: (114) / (113)	Abundance Ratio: (116) / (113)	Abundance Ratio: (117) / (113)	Abundance Ratio: (118) / (113)	Abundance Ratio: (119) / (113)	Abundances (Grouped): 113	Abundances (Grouped): 114	Abundances (Grouped): 115	Abundances (Grouped): 116	Abundances (Grouped): 117	Abundances (Grouped): 118	Abundances (Grouped): 119	Abundances (Grouped): 121	Quan Info	Found in Sample: [S98] F12: 114, Sample	Found in Sample: [S99] F12: 115, Sample	Found in Sample: [S100] F12: 116, Sample	Found in Sample: [S101] F12: 117, Sample	Found in Sample: [S102] F12: 118, Sample	Found in Sample: [S103] F12: 119, Sample	Found in Sample: [S104] F12: 121, Sample	Percolator PEP (by Search Engine): Sequest HT	XCorr (by Search Engine): Sequest HT	Sequence in Protein	Positions in Protein	Peptide Group Modifications in Protein	Quan Usage
FALSE	[R].IMNSFSVVPSPK.[V]		1	0.844476	1	1	1	c53437_g1	c53437_g1 [163-174]	0	1321.68	0														No Quan Labels	Low	Low	Low	Low	Low	Low	Not Found	1	0.57	R.IMNSFSVVPSPK.V	[163-174]		Not Used
	Confidence	PSM Ambiguity	Annotated Sequence	Modifications	# Protein Groups	# Proteins	Master Protein Accessions	Protein Accessions	# Missed Cleavages	Charge	DeltaScore	DeltaCn	Rank	m/z [Da]	MH+ [Da]	Theo. MH+ [Da]	DeltaM [ppm]	Deltam/z [Da]	Activation Type	MS Order	Isolation Interference [%]	Average Reporter S/N	Ion Inject Time [ms]	RT [min]	First Scan	Spectrum File	Abundance: 113	Abundance: 114	Abundance: 115	Abundance: 116	Abundance: 117	Abundance: 118	Abundance: 119	XCorr	Percolator q-Value	Percolator PEP
	Low	Unambiguous	[R].ImNSFSVVPSPK.[V]	M2(Oxidation)	1	1	c53437_g1	c53437_g1	0	3	0.1228	0	1	441.232	1321.68	1321.68	-0.05	-2e-05	HCD (High Energy Collision Dissociation)	MS2	31.8908	41.6	50	40.7542	10427	SHUTSA.raw	31.5	56.1	29	31.7	34	31.8	118.8	0.57	0.8974	1
FALSE	[R].KLAVNMVPFPR.[L]		1	0.844476	1	5	7	c53437_g1	c53437_g1 [252-262]	1	1271.73	0														No Quan Labels	Low	Low	Low	Low	Low	Low	Not Found	1	0.52	R.KLAVNMVPFPR.L	[252-262]		Not Used
	Confidence	PSM Ambiguity	Annotated Sequence	Modifications	# Protein Groups	# Proteins	Master Protein Accessions	Protein Accessions	# Missed Cleavages	Charge	DeltaScore	DeltaCn	Rank	m/z [Da]	MH+ [Da]	Theo. MH+ [Da]	DeltaM [ppm]	Deltam/z [Da]	Activation Type	MS Order	Isolation Interference [%]	Average Reporter S/N	Ion Inject Time [ms]	RT [min]	First Scan	Spectrum File	Abundance: 113	Abundance: 114	Abundance: 115	Abundance: 116	Abundance: 117	Abundance: 118	Abundance: 119	XCorr	Percolator q-Value	Percolator PEP
	Low	Selected	[R].KLAVNMVPFPR.[L]		1	5	c53437_g1	c65387_g1; c62105_g2; c73709_g2; c32367_g1; c53437_g1	1	2		0	2	636.366	1271.72	1271.73	-4.01	-0.00255	HCD (High Energy Collision Dissociation)	MS2	55.1704	3.5	50	31.5476	7954	SHUTSA.raw	7.1	5.2	4.5		4	7		0.5	0.8974	1
	Low	Selected	[R].KLAVNMVPFPR.[L]		1	5	c53437_g1	c65387_g1; c62105_g2; c73709_g2; c32367_g1; c53437_g1	1	2		0	2	636.362	1271.72	1271.73	-9.2	-0.00585	HCD (High Energy Collision Dissociation)	MS2	15.6928	3.6	50	72.3983	18320	SHUTSA.raw	3.6	3.7	4.8	4	4	4.8	4.1	0.46	0.8974	1
	Low	Selected	[R].KLAVNMVPFPR.[L]		1	5	c53437_g1	c65387_g1; c62105_g2; c73709_g2; c32367_g1; c53437_g1	1	2		0.0189	3	636.366	1271.73	1271.73	-3.34	-0.00213	HCD (High Energy Collision Dissociation)	MS2	30.5477	3.8	50	27.9516	6984	SHUTSA.raw	4.8	4.8	5	4.1	4.1	4.3	3.6	0.52	0.8974	1
	Low	Selected	[R].KLAVNMVPFPR.[L]		1	5	c53437_g1	c65387_g1; c62105_g2; c73709_g2; c32367_g1; c53437_g1	1	2	0.0217	0	1	636.363	1271.72	1271.73	-8.24	-0.00524	HCD (High Energy Collision Dissociation)	MS2	57.1038	10.3	50	71.0252	17889	SHUTSA.raw	11.8	12.4	11.8	10.2	8	13.6	14.4	0.46	0.8974	1
	Low	Selected	[R].KLAVNMVPFPR.[L]		1	5	c53437_g1	c65387_g1; c62105_g2; c73709_g2; c32367_g1; c53437_g1	1	2	0.0222	0	1	636.364	1271.72	1271.73	-7.37	-0.00469	HCD (High Energy Collision Dissociation)	MS2	34.501	6.2	50	71.2078	17949	SHUTSA.raw	8.1	4.6	6.8	8.7	8.2	6.6	6.4	0.45	0.8974	1
	Low	Selected	[R].KLAVNMVPFPR.[L]		1	5	c53437_g1	c65387_g1; c62105_g2; c73709_g2; c32367_g1; c53437_g1	1	2		0.0222	2	636.363	1271.72	1271.73	-7.57	-0.00481	HCD (High Energy Collision Dissociation)	MS2	45.599	1.4	50	71.7896	18133	SHUTSA.raw	3.1	3				2.8	2.4	0.44	0.8974	1
	Low	Selected	[R].KLAVNMVPFPR.[L]		1	5	c53437_g1	c65387_g1; c62105_g2; c73709_g2; c32367_g1; c53437_g1	1	2		0.0426	6	636.364	1271.72	1271.73	-6.51	-0.00414	HCD (High Energy Collision Dissociation)	MS2	16.8359	2.7	50	74.1122	18813	SHUTSA.raw	4.8	3.3	2.8		2.6	4.6	3.4	0.45	0.9187	1
High	c64565_g1	0.076	0	4	2	2	2	1	452	52.2	7.77	0	2														Low	Low	Low	Low	Low	Low	Low
Checked	Annotated Sequence	Modifications in Master Proteins	Qvality PEP	Qvality q-value	# Protein Groups	# Proteins	# PSMs	Master Protein Accessions	Positions in Master Proteins	# Missed Cleavages	Theo. MH+ [Da]	# Razor Quan Results	Abundance Ratio: (114) / (113)	Abundance Ratio: (116) / (113)	Abundance Ratio: (117) / (113)	Abundance Ratio: (118) / (113)	Abundance Ratio: (119) / (113)	Abundances (Grouped): 113	Abundances (Grouped): 114	Abundances (Grouped): 115	Abundances (Grouped): 116	Abundances (Grouped): 117	Abundances (Grouped): 118	Abundances (Grouped): 119	Abundances (Grouped): 121	Quan Info	Found in Sample: [S98] F12: 114, Sample	Found in Sample: [S99] F12: 115, Sample	Found in Sample: [S100] F12: 116, Sample	Found in Sample: [S101] F12: 117, Sample	Found in Sample: [S102] F12: 118, Sample	Found in Sample: [S103] F12: 119, Sample	Found in Sample: [S104] F12: 121, Sample	Percolator PEP (by Search Engine): Sequest HT	XCorr (by Search Engine): Sequest HT	Sequence in Protein	Positions in Protein	Peptide Group Modifications in Protein	Quan Usage
FALSE	[R].YISKPLLLDGYK.[F]		1	0.855853	1	1	1	c64565_g1	c64565_g1 [187-198]	0	2322.42	0														No Quan Values	Low	Low	Low	Low	Low	Low	Not Found	1	0.36	R.YISKPLLLDGYK.F	[187-198]		Not Used
	Confidence	PSM Ambiguity	Annotated Sequence	Modifications	# Protein Groups	# Proteins	Master Protein Accessions	Protein Accessions	# Missed Cleavages	Charge	DeltaScore	DeltaCn	Rank	m/z [Da]	MH+ [Da]	Theo. MH+ [Da]	DeltaM [ppm]	Deltam/z [Da]	Activation Type	MS Order	Isolation Interference [%]	Average Reporter S/N	Ion Inject Time [ms]	RT [min]	First Scan	Spectrum File	Abundance: 113	Abundance: 114	Abundance: 115	Abundance: 116	Abundance: 117	Abundance: 118	Abundance: 119	XCorr	Percolator q-Value	Percolator PEP
	Low	Selected	[R].yISkPLLLDGYk.[F]	N-Term(iTRAQ8plex); K4(iTRAQ8plex); K12(iTRAQ8plex)	1	1	c64565_g1	c64565_g1	0	2		0	4	1161.71	2322.41	2322.42	-3.88	-0.00451	HCD (High Energy Collision Dissociation)	MS2		6.9	50	70.7667	17809	SHUTSA.raw	8.2	7.4	7.1	8.5	8.1	7.2	9	0.36	0.8974	1
FALSE	[-].ASPAPPK.[S]		1	0.926357	1	1	1	c64565_g1	c64565_g1 [1-7]	0	667.377	0														No Quan Labels	Low	Low	Low	Low	Low	Low	Not Found	1	0.32	-.ASPAPPK.S	[1-7]		Not Used
	Confidence	PSM Ambiguity	Annotated Sequence	Modifications	# Protein Groups	# Proteins	Master Protein Accessions	Protein Accessions	# Missed Cleavages	Charge	DeltaScore	DeltaCn	Rank	m/z [Da]	MH+ [Da]	Theo. MH+ [Da]	DeltaM [ppm]	Deltam/z [Da]	Activation Type	MS Order	Isolation Interference [%]	Average Reporter S/N	Ion Inject Time [ms]	RT [min]	First Scan	Spectrum File	Abundance: 113	Abundance: 114	Abundance: 115	Abundance: 116	Abundance: 117	Abundance: 118	Abundance: 119	XCorr	Percolator q-Value	Percolator PEP
	Low	Rejected	[-].ASPAPPK.[S]		1	1	c64565_g1	c64565_g1	0	2		0.0303	3	334.195	667.382	667.377	7.25	0.00242	HCD (High Energy Collision Dissociation)	MS2	64.4668	17.6	9.041	55.8401	14117	SHUTSA.raw	70.4	7.5	13.6	23.5	4.1	18	3.8	0.32	0.9301	1
High	c133195_g1	0.119	0	45	2	8	2	1	47	5.4	9.88	0	2	1.102	1.069	1.477	1.277	1.182	1.246	95.8	105.5	102.4	141.4	122.3	113.2	119.4	Low	Low	Low	Low	Low	Low	Low
Checked	Annotated Sequence	Modifications in Master Proteins	Qvality PEP	Qvality q-value	# Protein Groups	# Proteins	# PSMs	Master Protein Accessions	Positions in Master Proteins	# Missed Cleavages	Theo. MH+ [Da]	# Razor Quan Results	Abundance Ratio: (114) / (113)	Abundance Ratio: (116) / (113)	Abundance Ratio: (117) / (113)	Abundance Ratio: (118) / (113)	Abundance Ratio: (119) / (113)	Abundances (Grouped): 113	Abundances (Grouped): 114	Abundances (Grouped): 115	Abundances (Grouped): 116	Abundances (Grouped): 117	Abundances (Grouped): 118	Abundances (Grouped): 119	Abundances (Grouped): 121	Quan Info	Found in Sample: [S98] F12: 114, Sample	Found in Sample: [S99] F12: 115, Sample	Found in Sample: [S100] F12: 116, Sample	Found in Sample: [S101] F12: 117, Sample	Found in Sample: [S102] F12: 118, Sample	Found in Sample: [S103] F12: 119, Sample	Found in Sample: [S104] F12: 121, Sample	Percolator PEP (by Search Engine): Sequest HT	XCorr (by Search Engine): Sequest HT	Sequence in Protein	Positions in Protein	Peptide Group Modifications in Protein	Quan Usage
FALSE	[K].LLLHLKPNDHIKFTRK.[C]		1	0.927739	1	1	7	c133195_g1	c133195_g1 [26-41]	2	2885.8	6	1.102	1.477	1.277	1.182	1.246	95.8	105.5	102.4	141.4	122.3	113.2	119.4			Low	Low	Low	Low	Low	Low	Not Found	1	0.11	K.LLLHLKPNDHIKFTRK.C	[26-41]		Used
	Confidence	PSM Ambiguity	Annotated Sequence	Modifications	# Protein Groups	# Proteins	Master Protein Accessions	Protein Accessions	# Missed Cleavages	Charge	DeltaScore	DeltaCn	Rank	m/z [Da]	MH+ [Da]	Theo. MH+ [Da]	DeltaM [ppm]	Deltam/z [Da]	Activation Type	MS Order	Isolation Interference [%]	Average Reporter S/N	Ion Inject Time [ms]	RT [min]	First Scan	Spectrum File	Abundance: 113	Abundance: 114	Abundance: 115	Abundance: 116	Abundance: 117	Abundance: 118	Abundance: 119	XCorr	Percolator q-Value	Percolator PEP
	Low	Rejected	[K].LLLHLkPNDHIkFTRk.[C]	K6(iTRAQ8plex); K12(iTRAQ8plex); K16(iTRAQ8plex)	1	1	c133195_g1	c133195_g1	2	2		0	6	1443.4	2885.8	2885.8	0.47	0.00068	HCD (High Energy Collision Dissociation)	MS2	0	53.5	50	70.6702	17778	SHUTSA.raw	61.7	52	66.6	66.5	44.3	69.5	67.6	0.11	0.9326	1
	Low	Selected	[K].LLLHLkPNDHIkFTRk.[C]	K6(iTRAQ8plex); K12(iTRAQ8plex); K16(iTRAQ8plex)	1	1	c133195_g1	c133195_g1	2	2		0	3	1443.41	2885.8	2885.8	2.67	0.00385	HCD (High Energy Collision Dissociation)	MS2	0	39.4	50	67.9436	16966	SHUTSA.raw	40.7	41.7	52.4	47.6	37	46.4	49.5	0.03	0.9376	1
	Low	Selected	[K].LLLHLkPNDHIkFTRk.[C]	K6(iTRAQ8plex); K12(iTRAQ8plex); K16(iTRAQ8plex)	1	1	c133195_g1	c133195_g1	2	2		0	6	1443.4	2885.8	2885.8	1.23	0.00177	HCD (High Energy Collision Dissociation)	MS2	0	52	50	72.2276	18269	SHUTSA.raw	55.5	55.6	70.2	60.7	55.1	58.8	60.2	0.03	0.9389	1
	Low	Selected	[K].LLLHLkPNDHIkFTRk.[C]	K6(iTRAQ8plex); K12(iTRAQ8plex); K16(iTRAQ8plex)	1	1	c133195_g1	c133195_g1	2	2		0	3	1443.41	2885.81	2885.8	4.61	0.00666	HCD (High Energy Collision Dissociation)	MS2	0	31.5	50	73.0905	18533	SHUTSA.raw	36.7	29.6	45.1	37.6	32.5	34.5	36.4	0.04	0.9443	1
	Low	Selected	[K].LLLHLkPNDHIkFTRk.[C]	K6(iTRAQ8plex); K12(iTRAQ8plex); K16(iTRAQ8plex)	1	1	c133195_g1	c133195_g1	2	2		0	2	1443.41	2885.81	2885.8	5.54	0.008	HCD (High Energy Collision Dissociation)	MS2	0	52.5	50	69.1305	17312	SHUTSA.raw	62.5	56	68.1	64.6	51.2	52.7	65	0.03	0.9443	1
	Low	Selected	[K].LLLHLkPNDHIkFTRk.[C]	K6(iTRAQ8plex); K12(iTRAQ8plex); K16(iTRAQ8plex)	1	1	c133195_g1	c133195_g1	2	2		0	6	1443.4	2885.8	2885.8	0.89	0.00129	HCD (High Energy Collision Dissociation)	MS2	0	66.5	50	69.9888	17569	SHUTSA.raw	68.9	73	82.4	87.4	68.4	73.5	78.7	0.03	0.9443	1
	Low	Selected	[K].LLLHLkPNDHIkFTRk.[C]	K6(iTRAQ8plex); K12(iTRAQ8plex); K16(iTRAQ8plex)	1	1	c133195_g1	c133195_g1	2	2		0	6	1443.4	2885.8	2885.8	1.82	0.00263	HCD (High Energy Collision Dissociation)	MS2	34.2746	45.1	50	68.1103	17016	SHUTSA.raw	49.9	52.7	58.8	49.2	44.9	51.1	53.8	0.03	0.9456	1
FALSE	[K].LVSQKLLLHLKPNDHIK.[F]		1	0.93603	1	1	1	c133195_g1	c133195_g1 [21-37]	1	2300.41	0														No Quan Values	Low	Low	Low	Low	Low	Low	Not Found	1	0.12	K.LVSQKLLLHLKPNDHIK.F	[21-37]		Not Used
	Confidence	PSM Ambiguity	Annotated Sequence	Modifications	# Protein Groups	# Proteins	Master Protein Accessions	Protein Accessions	# Missed Cleavages	Charge	DeltaScore	DeltaCn	Rank	m/z [Da]	MH+ [Da]	Theo. MH+ [Da]	DeltaM [ppm]	Deltam/z [Da]	Activation Type	MS Order	Isolation Interference [%]	Average Reporter S/N	Ion Inject Time [ms]	RT [min]	First Scan	Spectrum File	Abundance: 113	Abundance: 114	Abundance: 115	Abundance: 116	Abundance: 117	Abundance: 118	Abundance: 119	XCorr	Percolator q-Value	Percolator PEP
	Low	Selected	[K].LVSQKLLLHLKPNDHIk.[F]	K17(iTRAQ8plex)	1	1	c133195_g1	c133195_g1	1	2		0	6	1150.72	2300.43	2300.41	8.37	0.00962	HCD (High Energy Collision Dissociation)	MS2	47.5344	17.1	50	73.3486	18606	SHUTSA.raw	19.6	15.8	23.9	16.8	20	17.4	23.3	0.12	0.9443	1
High	c75576_g1	0.113	0	4	1	1	1	1	168	19.3	6.25	0	1														Low	Low	Low	Low	Low	Low	Low
Checked	Annotated Sequence	Modifications in Master Proteins	Qvality PEP	Qvality q-value	# Protein Groups	# Proteins	# PSMs	Master Protein Accessions	Positions in Master Proteins	# Missed Cleavages	Theo. MH+ [Da]	# Razor Quan Results	Abundance Ratio: (114) / (113)	Abundance Ratio: (116) / (113)	Abundance Ratio: (117) / (113)	Abundance Ratio: (118) / (113)	Abundance Ratio: (119) / (113)	Abundances (Grouped): 113	Abundances (Grouped): 114	Abundances (Grouped): 115	Abundances (Grouped): 116	Abundances (Grouped): 117	Abundances (Grouped): 118	Abundances (Grouped): 119	Abundances (Grouped): 121	Quan Info	Found in Sample: [S98] F12: 114, Sample	Found in Sample: [S99] F12: 115, Sample	Found in Sample: [S100] F12: 116, Sample	Found in Sample: [S101] F12: 117, Sample	Found in Sample: [S102] F12: 118, Sample	Found in Sample: [S103] F12: 119, Sample	Found in Sample: [S104] F12: 121, Sample	Percolator PEP (by Search Engine): Sequest HT	XCorr (by Search Engine): Sequest HT	Sequence in Protein	Positions in Protein	Peptide Group Modifications in Protein	Quan Usage
FALSE	[R].LKTAPR.[V]		1	0.933368	1	1	1	c75576_g1	c75576_g1 [46-51]	1	685.436	0														No Quan Labels	Low	Low	Low	Low	Low	Low	Not Found	1	0.58	R.LKTAPR.V	[46-51]		Not Used
	Confidence	PSM Ambiguity	Annotated Sequence	Modifications	# Protein Groups	# Proteins	Master Protein Accessions	Protein Accessions	# Missed Cleavages	Charge	DeltaScore	DeltaCn	Rank	m/z [Da]	MH+ [Da]	Theo. MH+ [Da]	DeltaM [ppm]	Deltam/z [Da]	Activation Type	MS Order	Isolation Interference [%]	Average Reporter S/N	Ion Inject Time [ms]	RT [min]	First Scan	Spectrum File	Abundance: 113	Abundance: 114	Abundance: 115	Abundance: 116	Abundance: 117	Abundance: 118	Abundance: 119	XCorr	Percolator q-Value	Percolator PEP
	Low	Unambiguous	[R].LKTAPR.[V]		1	1	c75576_g1	c75576_g1	1	2	0.3793	0	1	343.221	685.435	685.436	-0.18	-6e-05	HCD (High Energy Collision Dissociation)	MS2	39.279	63	50	36.1259	9215	SHUTSA.raw	61	27.1	182.3	62.4	43.8	66.6	60.9	0.58	0.9389	1
High	c19197_g1	0.084	0	2	1	1	1	1	371	40.2	9.36	0	1														Low	Low	Low	Low	Low	Low	Low
Checked	Annotated Sequence	Modifications in Master Proteins	Qvality PEP	Qvality q-value	# Protein Groups	# Proteins	# PSMs	Master Protein Accessions	Positions in Master Proteins	# Missed Cleavages	Theo. MH+ [Da]	# Razor Quan Results	Abundance Ratio: (114) / (113)	Abundance Ratio: (116) / (113)	Abundance Ratio: (117) / (113)	Abundance Ratio: (118) / (113)	Abundance Ratio: (119) / (113)	Abundances (Grouped): 113	Abundances (Grouped): 114	Abundances (Grouped): 115	Abundances (Grouped): 116	Abundances (Grouped): 117	Abundances (Grouped): 118	Abundances (Grouped): 119	Abundances (Grouped): 121	Quan Info	Found in Sample: [S98] F12: 114, Sample	Found in Sample: [S99] F12: 115, Sample	Found in Sample: [S100] F12: 116, Sample	Found in Sample: [S101] F12: 117, Sample	Found in Sample: [S102] F12: 118, Sample	Found in Sample: [S103] F12: 119, Sample	Found in Sample: [S104] F12: 121, Sample	Percolator PEP (by Search Engine): Sequest HT	XCorr (by Search Engine): Sequest HT	Sequence in Protein	Positions in Protein	Peptide Group Modifications in Protein	Quan Usage
FALSE	[K].ASKAAK.[EV]		1	0.944118	1	2	1	c19197_g1	c19197_g1 [364-369]	1	575.351	0														No Quan Labels	Low	Low	Low	Low	Low	Low	Not Found	1	0.39	K.ASKAAK.V	[364-369]		Not Used
	Confidence	PSM Ambiguity	Annotated Sequence	Modifications	# Protein Groups	# Proteins	Master Protein Accessions	Protein Accessions	# Missed Cleavages	Charge	DeltaScore	DeltaCn	Rank	m/z [Da]	MH+ [Da]	Theo. MH+ [Da]	DeltaM [ppm]	Deltam/z [Da]	Activation Type	MS Order	Isolation Interference [%]	Average Reporter S/N	Ion Inject Time [ms]	RT [min]	First Scan	Spectrum File	Abundance: 113	Abundance: 114	Abundance: 115	Abundance: 116	Abundance: 117	Abundance: 118	Abundance: 119	XCorr	Percolator q-Value	Percolator PEP
	Low	Unambiguous	[K].ASKAAK.[EV]		1	2	c19197_g1	c174735_g1; c19197_g1	1	2	0.1026	0	1	288.177	575.347	575.351	-7.13	-0.00205	HCD (High Energy Collision Dissociation)	MS2	14.544	13.7	50	21.9537	5142	SHUTSA.raw	19.9	7.7	12.6	26.2	24.9	11.2	7.2	0.39	0.9538	1
High	c27673_g1	0.083	0	2	1	1	1	1	492	53.1	6.68	0	1														Low	Low	Low	Low	Low	Low	Low
Checked	Annotated Sequence	Modifications in Master Proteins	Qvality PEP	Qvality q-value	# Protein Groups	# Proteins	# PSMs	Master Protein Accessions	Positions in Master Proteins	# Missed Cleavages	Theo. MH+ [Da]	# Razor Quan Results	Abundance Ratio: (114) / (113)	Abundance Ratio: (116) / (113)	Abundance Ratio: (117) / (113)	Abundance Ratio: (118) / (113)	Abundance Ratio: (119) / (113)	Abundances (Grouped): 113	Abundances (Grouped): 114	Abundances (Grouped): 115	Abundances (Grouped): 116	Abundances (Grouped): 117	Abundances (Grouped): 118	Abundances (Grouped): 119	Abundances (Grouped): 121	Quan Info	Found in Sample: [S98] F12: 114, Sample	Found in Sample: [S99] F12: 115, Sample	Found in Sample: [S100] F12: 116, Sample	Found in Sample: [S101] F12: 117, Sample	Found in Sample: [S102] F12: 118, Sample	Found in Sample: [S103] F12: 119, Sample	Found in Sample: [S104] F12: 121, Sample	Percolator PEP (by Search Engine): Sequest HT	XCorr (by Search Engine): Sequest HT	Sequence in Protein	Positions in Protein	Peptide Group Modifications in Protein	Quan Usage
FALSE	[R].LFGGATKK.[M]		1	0.882781	1	1	1	c27673_g1	c27673_g1 [350-357]	1	821.488	0														No Quan Labels	Low	Low	Low	Low	Low	Low	Not Found	1	0.38	R.LFGGATKK.M	[350-357]		Not Used
	Confidence	PSM Ambiguity	Annotated Sequence	Modifications	# Protein Groups	# Proteins	Master Protein Accessions	Protein Accessions	# Missed Cleavages	Charge	DeltaScore	DeltaCn	Rank	m/z [Da]	MH+ [Da]	Theo. MH+ [Da]	DeltaM [ppm]	Deltam/z [Da]	Activation Type	MS Order	Isolation Interference [%]	Average Reporter S/N	Ion Inject Time [ms]	RT [min]	First Scan	Spectrum File	Abundance: 113	Abundance: 114	Abundance: 115	Abundance: 116	Abundance: 117	Abundance: 118	Abundance: 119	XCorr	Percolator q-Value	Percolator PEP
	Low	Unambiguous	[R].LFGGATKK.[M]		1	1	c27673_g1	c27673_g1	1	2	0.0789	0	1	411.251	821.495	821.488	8.99	0.00369	HCD (High Energy Collision Dissociation)	MS2	0	38.5	50	39.4887	10095	SHUTSA.raw	99.9	28.3	83.6	24	15.2	27.9	29.1	0.38	0.9015	1
High	c187981_g1	0.086	0	1	1	1	1	1	484	53.8	6.43	0	1														Low	Low	Low	Not Found	Not Found	Low	Low
Checked	Annotated Sequence	Modifications in Master Proteins	Qvality PEP	Qvality q-value	# Protein Groups	# Proteins	# PSMs	Master Protein Accessions	Positions in Master Proteins	# Missed Cleavages	Theo. MH+ [Da]	# Razor Quan Results	Abundance Ratio: (114) / (113)	Abundance Ratio: (116) / (113)	Abundance Ratio: (117) / (113)	Abundance Ratio: (118) / (113)	Abundance Ratio: (119) / (113)	Abundances (Grouped): 113	Abundances (Grouped): 114	Abundances (Grouped): 115	Abundances (Grouped): 116	Abundances (Grouped): 117	Abundances (Grouped): 118	Abundances (Grouped): 119	Abundances (Grouped): 121	Quan Info	Found in Sample: [S98] F12: 114, Sample	Found in Sample: [S99] F12: 115, Sample	Found in Sample: [S100] F12: 116, Sample	Found in Sample: [S101] F12: 117, Sample	Found in Sample: [S102] F12: 118, Sample	Found in Sample: [S103] F12: 119, Sample	Found in Sample: [S104] F12: 121, Sample	Percolator PEP (by Search Engine): Sequest HT	XCorr (by Search Engine): Sequest HT	Sequence in Protein	Positions in Protein	Peptide Group Modifications in Protein	Quan Usage
FALSE	[R].AAFKGK.[TS]		1	0.923095	1	2	1	c187981_g1	c187981_g1 [272-277]	1	621.372	0														No Quan Labels	Low	Low	Not Found	Not Found	Low	Low	Not Found	1	0.18	R.AAFKGK.S	[272-277]		Not Used
	Confidence	PSM Ambiguity	Annotated Sequence	Modifications	# Protein Groups	# Proteins	Master Protein Accessions	Protein Accessions	# Missed Cleavages	Charge	DeltaScore	DeltaCn	Rank	m/z [Da]	MH+ [Da]	Theo. MH+ [Da]	DeltaM [ppm]	Deltam/z [Da]	Activation Type	MS Order	Isolation Interference [%]	Average Reporter S/N	Ion Inject Time [ms]	RT [min]	First Scan	Spectrum File	Abundance: 113	Abundance: 114	Abundance: 115	Abundance: 116	Abundance: 117	Abundance: 118	Abundance: 119	XCorr	Percolator q-Value	Percolator PEP
	Low	Unambiguous	[R].AAFKGK.[TS]		1	2	c187981_g1	c40612_g1; c187981_g1	1	2	0.7222	0	1	311.188	621.368	621.372	-6.38	-0.00198	HCD (High Energy Collision Dissociation)	MS2	12.3	3.3	7.825	28.113	7032	SHUTSA.raw	11.9	2.9	2.5			4.4	4.5	0.18	0.9291	1
High	c66559_g1	0.086	0	1	1	2	1	1	705	75.7	6.18	0	1														Low	Low	Low	Low	Low	Low	Low
Checked	Annotated Sequence	Modifications in Master Proteins	Qvality PEP	Qvality q-value	# Protein Groups	# Proteins	# PSMs	Master Protein Accessions	Positions in Master Proteins	# Missed Cleavages	Theo. MH+ [Da]	# Razor Quan Results	Abundance Ratio: (114) / (113)	Abundance Ratio: (116) / (113)	Abundance Ratio: (117) / (113)	Abundance Ratio: (118) / (113)	Abundance Ratio: (119) / (113)	Abundances (Grouped): 113	Abundances (Grouped): 114	Abundances (Grouped): 115	Abundances (Grouped): 116	Abundances (Grouped): 117	Abundances (Grouped): 118	Abundances (Grouped): 119	Abundances (Grouped): 121	Quan Info	Found in Sample: [S98] F12: 114, Sample	Found in Sample: [S99] F12: 115, Sample	Found in Sample: [S100] F12: 116, Sample	Found in Sample: [S101] F12: 117, Sample	Found in Sample: [S102] F12: 118, Sample	Found in Sample: [S103] F12: 119, Sample	Found in Sample: [S104] F12: 121, Sample	Percolator PEP (by Search Engine): Sequest HT	XCorr (by Search Engine): Sequest HT	Sequence in Protein	Positions in Protein	Peptide Group Modifications in Protein	Quan Usage
FALSE	[K].HAGLQR.[YG]		1	0.844476	1	2	4	c66559_g1	c66559_g1 [224-229]	0	681.379	0														No Quan Labels	Low	Low	Low	Low	Low	Low	Not Found	1	0.83	K.HAGLQR.G	[224-229]		Not Used
	Confidence	PSM Ambiguity	Annotated Sequence	Modifications	# Protein Groups	# Proteins	Master Protein Accessions	Protein Accessions	# Missed Cleavages	Charge	DeltaScore	DeltaCn	Rank	m/z [Da]	MH+ [Da]	Theo. MH+ [Da]	DeltaM [ppm]	Deltam/z [Da]	Activation Type	MS Order	Isolation Interference [%]	Average Reporter S/N	Ion Inject Time [ms]	RT [min]	First Scan	Spectrum File	Abundance: 113	Abundance: 114	Abundance: 115	Abundance: 116	Abundance: 117	Abundance: 118	Abundance: 119	XCorr	Percolator q-Value	Percolator PEP
	Low	Unambiguous	[K].HAGIQR.[YG]		1	1		c74284_g1	0	2		0	1	341.19	681.372	681.379	-9.68	-0.0033	HCD (High Energy Collision Dissociation)	MS2	58.0485	24.1	50	47.4851	12089	SHUTSA.raw	41	21.7	15.1	29.4	27.5	28.4	29.8	0.83	0.8974	1
	Low	Unambiguous	[K].HAGLQR.[YG]		1	1	c66559_g1	c66559_g1	0	2	0	0	1	341.19	681.372	681.379	-9.68	-0.0033	HCD (High Energy Collision Dissociation)	MS2	58.0485	24.1	50	47.4851	12089	SHUTSA.raw	41	21.7	15.1	29.4	27.5	28.4	29.8	0.83	0.8974	1
	Low	Rejected	[K].HAGLQR.[YG]		1	1	c66559_g1	c66559_g1	0	2		0	1	341.191	681.376	681.379	-5.03	-0.00171	HCD (High Energy Collision Dissociation)	MS2	47.4571	26.4	50	69.6883	17476	SHUTSA.raw	51.9	20.2	15.1	33.8	35.2	23.3	31.3	0.8	0.9503	1
	Low	Selected	[K].HAGIQR.[YG]		1	1		c74284_g1	0	2	0	0	1	341.191	681.376	681.379	-5.03	-0.00171	HCD (High Energy Collision Dissociation)	MS2	47.4571	26.4	50	69.6883	17476	SHUTSA.raw	51.9	20.2	15.1	33.8	35.2	23.3	31.3	0.8	0.9503	1
High	c76948_g3	0.087	0	4	1	8	1	1	223	25.3	9.31	0	1														Low	Low	Low	Low	Low	Low	Low
Checked	Annotated Sequence	Modifications in Master Proteins	Qvality PEP	Qvality q-value	# Protein Groups	# Proteins	# PSMs	Master Protein Accessions	Positions in Master Proteins	# Missed Cleavages	Theo. MH+ [Da]	# Razor Quan Results	Abundance Ratio: (114) / (113)	Abundance Ratio: (116) / (113)	Abundance Ratio: (117) / (113)	Abundance Ratio: (118) / (113)	Abundance Ratio: (119) / (113)	Abundances (Grouped): 113	Abundances (Grouped): 114	Abundances (Grouped): 115	Abundances (Grouped): 116	Abundances (Grouped): 117	Abundances (Grouped): 118	Abundances (Grouped): 119	Abundances (Grouped): 121	Quan Info	Found in Sample: [S98] F12: 114, Sample	Found in Sample: [S99] F12: 115, Sample	Found in Sample: [S100] F12: 116, Sample	Found in Sample: [S101] F12: 117, Sample	Found in Sample: [S102] F12: 118, Sample	Found in Sample: [S103] F12: 119, Sample	Found in Sample: [S104] F12: 121, Sample	Percolator PEP (by Search Engine): Sequest HT	XCorr (by Search Engine): Sequest HT	Sequence in Protein	Positions in Protein	Peptide Group Modifications in Protein	Quan Usage
FALSE	[K].TGKKPGPQR.[Y]		1	0.913143	1	1	8	c76948_g3	c76948_g3 [74-82]	1	968.564	0														No Quan Labels	Low	Low	Low	Low	Low	Low	Not Found	1	0.64	K.TGKKPGPQR.Y	[74-82]		Not Used
	Confidence	PSM Ambiguity	Annotated Sequence	Modifications	# Protein Groups	# Proteins	Master Protein Accessions	Protein Accessions	# Missed Cleavages	Charge	DeltaScore	DeltaCn	Rank	m/z [Da]	MH+ [Da]	Theo. MH+ [Da]	DeltaM [ppm]	Deltam/z [Da]	Activation Type	MS Order	Isolation Interference [%]	Average Reporter S/N	Ion Inject Time [ms]	RT [min]	First Scan	Spectrum File	Abundance: 113	Abundance: 114	Abundance: 115	Abundance: 116	Abundance: 117	Abundance: 118	Abundance: 119	XCorr	Percolator q-Value	Percolator PEP
	Low	Unambiguous	[K].TGKKPGPQR.[Y]		1	1	c76948_g3	c76948_g3	1	2	0.1628	0	1	484.783	968.558	968.564	-5.93	-0.00287	HCD (High Energy Collision Dissociation)	MS2	56.5312	43	12.825	42.253	10807	SHUTSA.raw	19.6	99.5	176.8	13	13.4	10.7	11.3	0.43	0.9096	1
	Low	Unambiguous	[K].TGKKPGPQR.[Y]		1	1	c76948_g3	c76948_g3	1	2	0.0862	0	1	484.785	968.562	968.564	-1.2	-0.00058	HCD (High Energy Collision Dissociation)	MS2	61.1692	35.2	18.893	21.7546	5069	SHUTSA.raw	44.2	72.1	118.5	16.1	11.5	11	8.5	0.58	0.9182	1
	Low	Selected	[K].TGKKPGPQR.[Y]		1	1	c76948_g3	c76948_g3	1	2	0.0492	0	1	484.782	968.556	968.564	-7.57	-0.00366	HCD (High Energy Collision Dissociation)	MS2	64.3301	73.5	8.703	51.8227	13184	SHUTSA.raw	29.6	180.9	288.6	28.3	25.5	16.1	19.4	0.61	0.9272	1
	Low	Selected	[K].TGKKPGPQR.[Y]		1	1	c76948_g3	c76948_g3	1	2	0.0192	0	1	484.782	968.557	968.564	-6.62	-0.00321	HCD (High Energy Collision Dissociation)	MS2	49.9894	41.8	10.537	46.3487	11800	SHUTSA.raw	21.7	99.2	160.3	17	15.7	9.7	10.4	0.52	0.9286	1
	Low	Selected	[K].TGKKPGPQR.[Y]		1	1	c76948_g3	c76948_g3	1	2	0.0492	0	1	484.782	968.557	968.564	-7.12	-0.00345	HCD (High Energy Collision Dissociation)	MS2	64.6869	51.4	33.131	21.4011	4934	SHUTSA.raw	79.8	100.4	158.9	18.8	19.1	17.4	17	0.61	0.9291	1
	Low	Selected	[K].TGKKPGPQR.[Y]		1	1	c76948_g3	c76948_g3	1	2	0	0	1	484.782	968.556	968.564	-7.75	-0.00376	HCD (High Energy Collision Dissociation)	MS2	54.8925	46.4	50	74.4852	18929	SHUTSA.raw	50.9	84.3	138.6	46.8	43		7.2	0.47	0.9301	1
	Low	Unambiguous	[K].TGKKPGPQR.[Y]		1	1	c76948_g3	c76948_g3	1	2	0.0938	0	1	484.782	968.556	968.564	-7.44	-0.0036	HCD (High Energy Collision Dissociation)	MS2	59.3542	35	50	18.8862	4187	SHUTSA.raw	28.7	75.3	118.1	16.1	14.4	14	13.5	0.64	0.9301	1
	Low	Rejected	[K].TGKKPGPQR.[Y]		1	1	c76948_g3	c76948_g3	1	2		0.0351	2	484.781	968.554	968.564	-9.71	-0.0047	HCD (High Energy Collision Dissociation)	MS2	58.3736	54.4	9.798	28.4468	7122	SHUTSA.raw	26.1	131.5	211.3	23.6	18.4	12.5	11.8	0.55	0.9301	1
High	c18438_g1	0.088	0	10	1	5	1	1	123	13.7	8.91	0	1														Low	Low	Low	Low	Low	Low	Low
Checked	Annotated Sequence	Modifications in Master Proteins	Qvality PEP	Qvality q-value	# Protein Groups	# Proteins	# PSMs	Master Protein Accessions	Positions in Master Proteins	# Missed Cleavages	Theo. MH+ [Da]	# Razor Quan Results	Abundance Ratio: (114) / (113)	Abundance Ratio: (116) / (113)	Abundance Ratio: (117) / (113)	Abundance Ratio: (118) / (113)	Abundance Ratio: (119) / (113)	Abundances (Grouped): 113	Abundances (Grouped): 114	Abundances (Grouped): 115	Abundances (Grouped): 116	Abundances (Grouped): 117	Abundances (Grouped): 118	Abundances (Grouped): 119	Abundances (Grouped): 121	Quan Info	Found in Sample: [S98] F12: 114, Sample	Found in Sample: [S99] F12: 115, Sample	Found in Sample: [S100] F12: 116, Sample	Found in Sample: [S101] F12: 117, Sample	Found in Sample: [S102] F12: 118, Sample	Found in Sample: [S103] F12: 119, Sample	Found in Sample: [S104] F12: 121, Sample	Percolator PEP (by Search Engine): Sequest HT	XCorr (by Search Engine): Sequest HT	Sequence in Protein	Positions in Protein	Peptide Group Modifications in Protein	Quan Usage
FALSE	[K].MAKPGSPSFKIR.[R]		1	0.844476	1	1	5	c18438_g1	c18438_g1 [109-120]	1	1334.72	0														No Quan Labels	Low	Low	Low	Low	Low	Low	Not Found	1	0.42	K.MAKPGSPSFKIR.R	[109-120]		Not Used
	Confidence	PSM Ambiguity	Annotated Sequence	Modifications	# Protein Groups	# Proteins	Master Protein Accessions	Protein Accessions	# Missed Cleavages	Charge	DeltaScore	DeltaCn	Rank	m/z [Da]	MH+ [Da]	Theo. MH+ [Da]	DeltaM [ppm]	Deltam/z [Da]	Activation Type	MS Order	Isolation Interference [%]	Average Reporter S/N	Ion Inject Time [ms]	RT [min]	First Scan	Spectrum File	Abundance: 113	Abundance: 114	Abundance: 115	Abundance: 116	Abundance: 117	Abundance: 118	Abundance: 119	XCorr	Percolator q-Value	Percolator PEP
	Low	Unambiguous	[K].mAKPGSPSFKIR.[R]	M1(Oxidation)	1	1	c18438_g1	c18438_g1	1	2	0.119	0	1	667.864	1334.72	1334.72	-3.12	-0.00208	HCD (High Energy Collision Dissociation)	MS2	37.3231	2.9	50	57.4356	14499	SHUTSA.raw		2.1	4.1	4.3	3.6	5.9	3.4	0.42	0.8856	1
	Low	Rejected	[K].mAKPGSPSFKIR.[R]	M1(Oxidation)	1	1	c18438_g1	c18438_g1	1	2		0.025	2	667.864	1334.72	1334.72	-2.57	-0.00172	HCD (High Energy Collision Dissociation)	MS2	40.3235	1	50	57.7321	14572	SHUTSA.raw				3.3	2.5	2.3		0.39	0.8974	1
	Low	Selected	[K].mAKPGSPSFKIR.[R]	M1(Oxidation)	1	1	c18438_g1	c18438_g1	1	2	0.05	0	1	667.863	1334.72	1334.72	-4.04	-0.00269	HCD (High Energy Collision Dissociation)	MS2		1	47.901	47.9863	12218	SHUTSA.raw	2.8		2.5				2.9	0.4	0.8974	1
	Low	Selected	[K].mAKPGSPSFKIR.[R]	M1(Oxidation)	1	1	c18438_g1	c18438_g1	1	2	0.0244	0	1	667.864	1334.72	1334.72	-3.03	-0.00202	HCD (High Energy Collision Dissociation)	MS2	34.8996	1.1	49.23	48.4215	12334	SHUTSA.raw	2.9				1.9	4.1		0.41	0.8974	1
	Low	Unambiguous	[K].mAKPGSPSFKIR.[R]	M1(Oxidation)	1	1	c18438_g1	c18438_g1	1	2	0.2439	0	1	667.863	1334.72	1334.72	-5.13	-0.00343	HCD (High Energy Collision Dissociation)	MS2	37.9001	1.6	43.401	56.8372	14356	SHUTSA.raw	3.1	2	4.4	3.1				0.41	0.9015	1
High	c115748_g1	0.09	0	16	1	1	1	1	74	8.2	9.35	0	1														Low	Low	Low	Low	Low	Low	Low
Checked	Annotated Sequence	Modifications in Master Proteins	Qvality PEP	Qvality q-value	# Protein Groups	# Proteins	# PSMs	Master Protein Accessions	Positions in Master Proteins	# Missed Cleavages	Theo. MH+ [Da]	# Razor Quan Results	Abundance Ratio: (114) / (113)	Abundance Ratio: (116) / (113)	Abundance Ratio: (117) / (113)	Abundance Ratio: (118) / (113)	Abundance Ratio: (119) / (113)	Abundances (Grouped): 113	Abundances (Grouped): 114	Abundances (Grouped): 115	Abundances (Grouped): 116	Abundances (Grouped): 117	Abundances (Grouped): 118	Abundances (Grouped): 119	Abundances (Grouped): 121	Quan Info	Found in Sample: [S98] F12: 114, Sample	Found in Sample: [S99] F12: 115, Sample	Found in Sample: [S100] F12: 116, Sample	Found in Sample: [S101] F12: 117, Sample	Found in Sample: [S102] F12: 118, Sample	Found in Sample: [S103] F12: 119, Sample	Found in Sample: [S104] F12: 121, Sample	Percolator PEP (by Search Engine): Sequest HT	XCorr (by Search Engine): Sequest HT	Sequence in Protein	Positions in Protein	Peptide Group Modifications in Protein	Quan Usage
FALSE	[K].FLGAVFSYLAKR.[I]		1	0.844476	1	1	1	c115748_g1	c115748_g1 [16-27]	1	1371.78	0														No Quan Labels	Low	Low	Low	Low	Low	Low	Not Found	1	0.59	K.FLGAVFSYLAKR.I	[16-27]		Not Used
	Confidence	PSM Ambiguity	Annotated Sequence	Modifications	# Protein Groups	# Proteins	Master Protein Accessions	Protein Accessions	# Missed Cleavages	Charge	DeltaScore	DeltaCn	Rank	m/z [Da]	MH+ [Da]	Theo. MH+ [Da]	DeltaM [ppm]	Deltam/z [Da]	Activation Type	MS Order	Isolation Interference [%]	Average Reporter S/N	Ion Inject Time [ms]	RT [min]	First Scan	Spectrum File	Abundance: 113	Abundance: 114	Abundance: 115	Abundance: 116	Abundance: 117	Abundance: 118	Abundance: 119	XCorr	Percolator q-Value	Percolator PEP
	Low	Unambiguous	[K].FLGAVFSYLAKR.[I]		1	1	c115748_g1	c115748_g1	1	2	0.0678	0	1	686.396	1371.78	1371.78	4.48	0.00307	HCD (High Energy Collision Dissociation)	MS2		21.8	50	26.8018	6655	SHUTSA.raw	15.1	7.1	43	43.3	49.6	10.3	6	0.59	0.8974	1
High	c45799_g1	0.091	0	4	2	2	2	1	450	50.6	9.09	0	2	0.998	0.631	0.703	0.465	0.747	0.636	154.4	154.2	97.4	108.5	71.8	115.4	98.2	Low	Low	Low	Low	Low	Low	Low
Checked	Annotated Sequence	Modifications in Master Proteins	Qvality PEP	Qvality q-value	# Protein Groups	# Proteins	# PSMs	Master Protein Accessions	Positions in Master Proteins	# Missed Cleavages	Theo. MH+ [Da]	# Razor Quan Results	Abundance Ratio: (114) / (113)	Abundance Ratio: (116) / (113)	Abundance Ratio: (117) / (113)	Abundance Ratio: (118) / (113)	Abundance Ratio: (119) / (113)	Abundances (Grouped): 113	Abundances (Grouped): 114	Abundances (Grouped): 115	Abundances (Grouped): 116	Abundances (Grouped): 117	Abundances (Grouped): 118	Abundances (Grouped): 119	Abundances (Grouped): 121	Quan Info	Found in Sample: [S98] F12: 114, Sample	Found in Sample: [S99] F12: 115, Sample	Found in Sample: [S100] F12: 116, Sample	Found in Sample: [S101] F12: 117, Sample	Found in Sample: [S102] F12: 118, Sample	Found in Sample: [S103] F12: 119, Sample	Found in Sample: [S104] F12: 121, Sample	Percolator PEP (by Search Engine): Sequest HT	XCorr (by Search Engine): Sequest HT	Sequence in Protein	Positions in Protein	Peptide Group Modifications in Protein	Quan Usage
FALSE	[R].DPPSVRVAWPK.[A]		1	0.863213	1	1	1	c45799_g1	c45799_g1 [6-16]	1	1555.89	0														No Quan Values	Low	Low	Low	Low	Low	Low	Not Found	1	0.44	R.DPPSVRVAWPK.A	[6-16]		Not Used
	Confidence	PSM Ambiguity	Annotated Sequence	Modifications	# Protein Groups	# Proteins	Master Protein Accessions	Protein Accessions	# Missed Cleavages	Charge	DeltaScore	DeltaCn	Rank	m/z [Da]	MH+ [Da]	Theo. MH+ [Da]	DeltaM [ppm]	Deltam/z [Da]	Activation Type	MS Order	Isolation Interference [%]	Average Reporter S/N	Ion Inject Time [ms]	RT [min]	First Scan	Spectrum File	Abundance: 113	Abundance: 114	Abundance: 115	Abundance: 116	Abundance: 117	Abundance: 118	Abundance: 119	XCorr	Percolator q-Value	Percolator PEP
	Low	Selected	[R].dPPSVRVAWPK.[A]	N-Term(iTRAQ8plex)	1	1	c45799_g1	c45799_g1	1	3		0.0222	2	519.302	1555.89	1555.89	0.95	0.00049	HCD (High Energy Collision Dissociation)	MS2		6.3	50	41.5888	10641	SHUTSA.raw	13.9	9	7.2	5.6	3.1	6.8	4.7	0.44	0.8974	1
FALSE	[R].FAAGAK.[W]		1	0.93027	1	1	1	c45799_g1	c45799_g1 [174-179]	0	868.519	0	0.998	0.703	0.465	0.747	0.636	154.4	154.2	97.4	108.5	71.8	115.4	98.2			Low	Low	Low	Low	Low	Low	Not Found	1	0.45	R.FAAGAK.W	[174-179]		Used
	Confidence	PSM Ambiguity	Annotated Sequence	Modifications	# Protein Groups	# Proteins	Master Protein Accessions	Protein Accessions	# Missed Cleavages	Charge	DeltaScore	DeltaCn	Rank	m/z [Da]	MH+ [Da]	Theo. MH+ [Da]	DeltaM [ppm]	Deltam/z [Da]	Activation Type	MS Order	Isolation Interference [%]	Average Reporter S/N	Ion Inject Time [ms]	RT [min]	First Scan	Spectrum File	Abundance: 113	Abundance: 114	Abundance: 115	Abundance: 116	Abundance: 117	Abundance: 118	Abundance: 119	XCorr	Percolator q-Value	Percolator PEP
	Low	Unambiguous	[R].FAAGAk.[W]	K6(iTRAQ8plex)	1	1	c45799_g1	c45799_g1	0	2	0.1333	0	1	434.765	868.524	868.519	4.93	0.00214	HCD (High Energy Collision Dissociation)	MS2	44.0667	21.7	40.305	25.9578	6400	SHUTSA.raw	37.3	33.2	26.4	19.6	12.5	23.8	20.8	0.45	0.9357	1
High	c187800_g1	0.092	0	2	1	2	1	1	529	59.4	8.79	0	1														Low	Low	Low	Low	Low	Low	Low
Checked	Annotated Sequence	Modifications in Master Proteins	Qvality PEP	Qvality q-value	# Protein Groups	# Proteins	# PSMs	Master Protein Accessions	Positions in Master Proteins	# Missed Cleavages	Theo. MH+ [Da]	# Razor Quan Results	Abundance Ratio: (114) / (113)	Abundance Ratio: (116) / (113)	Abundance Ratio: (117) / (113)	Abundance Ratio: (118) / (113)	Abundance Ratio: (119) / (113)	Abundances (Grouped): 113	Abundances (Grouped): 114	Abundances (Grouped): 115	Abundances (Grouped): 116	Abundances (Grouped): 117	Abundances (Grouped): 118	Abundances (Grouped): 119	Abundances (Grouped): 121	Quan Info	Found in Sample: [S98] F12: 114, Sample	Found in Sample: [S99] F12: 115, Sample	Found in Sample: [S100] F12: 116, Sample	Found in Sample: [S101] F12: 117, Sample	Found in Sample: [S102] F12: 118, Sample	Found in Sample: [S103] F12: 119, Sample	Found in Sample: [S104] F12: 121, Sample	Percolator PEP (by Search Engine): Sequest HT	XCorr (by Search Engine): Sequest HT	Sequence in Protein	Positions in Protein	Peptide Group Modifications in Protein	Quan Usage
FALSE	[K].EVALRMLKELR.[S]		1	0.855853	1	1	2	c187800_g1	c187800_g1 [15-25]	2	1357.8	0														No Quan Labels	Low	Low	Low	Low	Low	Low	Not Found	1	0.78	K.EVALRMLKELR.S	[15-25]		Not Used
	Confidence	PSM Ambiguity	Annotated Sequence	Modifications	# Protein Groups	# Proteins	Master Protein Accessions	Protein Accessions	# Missed Cleavages	Charge	DeltaScore	DeltaCn	Rank	m/z [Da]	MH+ [Da]	Theo. MH+ [Da]	DeltaM [ppm]	Deltam/z [Da]	Activation Type	MS Order	Isolation Interference [%]	Average Reporter S/N	Ion Inject Time [ms]	RT [min]	First Scan	Spectrum File	Abundance: 113	Abundance: 114	Abundance: 115	Abundance: 116	Abundance: 117	Abundance: 118	Abundance: 119	XCorr	Percolator q-Value	Percolator PEP
	Low	Unambiguous	[K].EVALRMLKELR.[S]		1	1	c187800_g1	c187800_g1	2	2	0.141	0	1	679.408	1357.81	1357.8	7.98	0.00542	HCD (High Energy Collision Dissociation)	MS2	52.5351	10.3	50	25.3306	6226	SHUTSA.raw	20.2	9.6	15.4	8.5	6.7	14.7	7.4	0.78	0.8974	1
	Low	Selected	[K].EVALRMLKELR.[S]		1	1	c187800_g1	c187800_g1	2	2	0.026	0	1	679.41	1357.81	1357.8	9.96	0.00676	HCD (High Energy Collision Dissociation)	MS2		5.9	50	26.2262	6476	SHUTSA.raw	11.7	6	4.6	7.9	4.5	7.7	4.9	0.77	0.8974	1
High	c42675_g1	0.093	0	1	1	2	1	1	481	52.5	7.24	0	1														Low	Low	Low	Low	Low	Low	Low
Checked	Annotated Sequence	Modifications in Master Proteins	Qvality PEP	Qvality q-value	# Protein Groups	# Proteins	# PSMs	Master Protein Accessions	Positions in Master Proteins	# Missed Cleavages	Theo. MH+ [Da]	# Razor Quan Results	Abundance Ratio: (114) / (113)	Abundance Ratio: (116) / (113)	Abundance Ratio: (117) / (113)	Abundance Ratio: (118) / (113)	Abundance Ratio: (119) / (113)	Abundances (Grouped): 113	Abundances (Grouped): 114	Abundances (Grouped): 115	Abundances (Grouped): 116	Abundances (Grouped): 117	Abundances (Grouped): 118	Abundances (Grouped): 119	Abundances (Grouped): 121	Quan Info	Found in Sample: [S98] F12: 114, Sample	Found in Sample: [S99] F12: 115, Sample	Found in Sample: [S100] F12: 116, Sample	Found in Sample: [S101] F12: 117, Sample	Found in Sample: [S102] F12: 118, Sample	Found in Sample: [S103] F12: 119, Sample	Found in Sample: [S104] F12: 121, Sample	Percolator PEP (by Search Engine): Sequest HT	XCorr (by Search Engine): Sequest HT	Sequence in Protein	Positions in Protein	Peptide Group Modifications in Protein	Quan Usage
FALSE	[K].LRPLNR.[T]		1	0.867617	1	1	2	c42675_g1	c42675_g1 [243-248]	0	768.484	0														No Quan Labels	Low	Low	Low	Low	Low	Low	Not Found	1	0.65	K.LRPLNR.T	[243-248]		Not Used
	Confidence	PSM Ambiguity	Annotated Sequence	Modifications	# Protein Groups	# Proteins	Master Protein Accessions	Protein Accessions	# Missed Cleavages	Charge	DeltaScore	DeltaCn	Rank	m/z [Da]	MH+ [Da]	Theo. MH+ [Da]	DeltaM [ppm]	Deltam/z [Da]	Activation Type	MS Order	Isolation Interference [%]	Average Reporter S/N	Ion Inject Time [ms]	RT [min]	First Scan	Spectrum File	Abundance: 113	Abundance: 114	Abundance: 115	Abundance: 116	Abundance: 117	Abundance: 118	Abundance: 119	XCorr	Percolator q-Value	Percolator PEP
	Low	Rejected	[K].LRPLNR.[T]		1	1	c42675_g1	c42675_g1	0	2		0.0455	2	384.744	768.481	768.484	-3.51	-0.00135	HCD (High Energy Collision Dissociation)	MS2	23.1198	1.8	11.737	37.7804	9657	SHUTSA.raw	8.4		2.3			3.4		0.42	0.8974	1
	Low	Selected	[K].LRPLNR.[T]		1	1	c42675_g1	c42675_g1	0	2	0.0462	0	1	384.745	768.482	768.484	-2.55	-0.00098	HCD (High Energy Collision Dissociation)	MS2	16.013	12.1	50	37.439	9569	SHUTSA.raw	35.4	11.6	12.8	6.9	11	11.3	7.9	0.65	0.8974	1
High	c100059_g1	0.082	0	7	1	1	1	1	116	13.2	10.1	0	1														Low	Low	Low	Low	Low	Low	Low
Checked	Annotated Sequence	Modifications in Master Proteins	Qvality PEP	Qvality q-value	# Protein Groups	# Proteins	# PSMs	Master Protein Accessions	Positions in Master Proteins	# Missed Cleavages	Theo. MH+ [Da]	# Razor Quan Results	Abundance Ratio: (114) / (113)	Abundance Ratio: (116) / (113)	Abundance Ratio: (117) / (113)	Abundance Ratio: (118) / (113)	Abundance Ratio: (119) / (113)	Abundances (Grouped): 113	Abundances (Grouped): 114	Abundances (Grouped): 115	Abundances (Grouped): 116	Abundances (Grouped): 117	Abundances (Grouped): 118	Abundances (Grouped): 119	Abundances (Grouped): 121	Quan Info	Found in Sample: [S98] F12: 114, Sample	Found in Sample: [S99] F12: 115, Sample	Found in Sample: [S100] F12: 116, Sample	Found in Sample: [S101] F12: 117, Sample	Found in Sample: [S102] F12: 118, Sample	Found in Sample: [S103] F12: 119, Sample	Found in Sample: [S104] F12: 121, Sample	Percolator PEP (by Search Engine): Sequest HT	XCorr (by Search Engine): Sequest HT	Sequence in Protein	Positions in Protein	Peptide Group Modifications in Protein	Quan Usage
FALSE	[R].AGGVFKAR.[T]		1	0.913143	1	1	1	c100059_g1	c100059_g1 [14-21]	1	805.468	0														No Quan Labels	Low	Low	Low	Low	Low	Low	Not Found	1	0.3	R.AGGVFKAR.T	[14-21]		Not Used
	Confidence	PSM Ambiguity	Annotated Sequence	Modifications	# Protein Groups	# Proteins	Master Protein Accessions	Protein Accessions	# Missed Cleavages	Charge	DeltaScore	DeltaCn	Rank	m/z [Da]	MH+ [Da]	Theo. MH+ [Da]	DeltaM [ppm]	Deltam/z [Da]	Activation Type	MS Order	Isolation Interference [%]	Average Reporter S/N	Ion Inject Time [ms]	RT [min]	First Scan	Spectrum File	Abundance: 113	Abundance: 114	Abundance: 115	Abundance: 116	Abundance: 117	Abundance: 118	Abundance: 119	XCorr	Percolator q-Value	Percolator PEP
	Low	Selected	[R].AGGVFKAR.[T]		1	1	c100059_g1	c100059_g1	1	2	0.0333	0	1	403.238	805.468	805.468	0.59	0.00024	HCD (High Energy Collision Dissociation)	MS2	15.1774	9.6	43.954	41.5803	10637	SHUTSA.raw	25.1	10	13.1	7.3	5.6	10.7	4.7	0.3	0.9101	1
High	c122451_g1	0.082	0	3	1	1	1	1	220	24.4	5.53	0	1														Low	Low	Low	Low	Low	Low	Low
Checked	Annotated Sequence	Modifications in Master Proteins	Qvality PEP	Qvality q-value	# Protein Groups	# Proteins	# PSMs	Master Protein Accessions	Positions in Master Proteins	# Missed Cleavages	Theo. MH+ [Da]	# Razor Quan Results	Abundance Ratio: (114) / (113)	Abundance Ratio: (116) / (113)	Abundance Ratio: (117) / (113)	Abundance Ratio: (118) / (113)	Abundance Ratio: (119) / (113)	Abundances (Grouped): 113	Abundances (Grouped): 114	Abundances (Grouped): 115	Abundances (Grouped): 116	Abundances (Grouped): 117	Abundances (Grouped): 118	Abundances (Grouped): 119	Abundances (Grouped): 121	Quan Info	Found in Sample: [S98] F12: 114, Sample	Found in Sample: [S99] F12: 115, Sample	Found in Sample: [S100] F12: 116, Sample	Found in Sample: [S101] F12: 117, Sample	Found in Sample: [S102] F12: 118, Sample	Found in Sample: [S103] F12: 119, Sample	Found in Sample: [S104] F12: 121, Sample	Percolator PEP (by Search Engine): Sequest HT	XCorr (by Search Engine): Sequest HT	Sequence in Protein	Positions in Protein	Peptide Group Modifications in Protein	Quan Usage
FALSE	[K].NIMKTK.[Q]		1	0.944118	1	1	1	c122451_g1	c122451_g1 [121-126]	1	1358.83	0														No Quan Values	Low	Low	Low	Low	Low	Low	Not Found	1	0.57	K.NIMKTK.Q	[121-126]		Not Used
	Confidence	PSM Ambiguity	Annotated Sequence	Modifications	# Protein Groups	# Proteins	Master Protein Accessions	Protein Accessions	# Missed Cleavages	Charge	DeltaScore	DeltaCn	Rank	m/z [Da]	MH+ [Da]	Theo. MH+ [Da]	DeltaM [ppm]	Deltam/z [Da]	Activation Type	MS Order	Isolation Interference [%]	Average Reporter S/N	Ion Inject Time [ms]	RT [min]	First Scan	Spectrum File	Abundance: 113	Abundance: 114	Abundance: 115	Abundance: 116	Abundance: 117	Abundance: 118	Abundance: 119	XCorr	Percolator q-Value	Percolator PEP
	Low	Unambiguous	[K].nImKTk.[Q]	N-Term(iTRAQ8plex); M3(Oxidation); K6(iTRAQ8plex)	1	1	c122451_g1	c122451_g1	1	2	0.0702	0	1	679.921	1358.84	1358.83	4.93	0.00335	HCD (High Energy Collision Dissociation)	MS2	24.8486	4.9	50	64.1108	16039	SHUTSA.raw	11.9	5.4	4.2	4.6	3.4	3.8	5.6	0.57	0.9536	1
High	c65261_g1	0.072	0	2	1	6	1	1	312	34.8	4.86	0	1														Low	Low	Low	Low	Low	Low	Low
Checked	Annotated Sequence	Modifications in Master Proteins	Qvality PEP	Qvality q-value	# Protein Groups	# Proteins	# PSMs	Master Protein Accessions	Positions in Master Proteins	# Missed Cleavages	Theo. MH+ [Da]	# Razor Quan Results	Abundance Ratio: (114) / (113)	Abundance Ratio: (116) / (113)	Abundance Ratio: (117) / (113)	Abundance Ratio: (118) / (113)	Abundance Ratio: (119) / (113)	Abundances (Grouped): 113	Abundances (Grouped): 114	Abundances (Grouped): 115	Abundances (Grouped): 116	Abundances (Grouped): 117	Abundances (Grouped): 118	Abundances (Grouped): 119	Abundances (Grouped): 121	Quan Info	Found in Sample: [S98] F12: 114, Sample	Found in Sample: [S99] F12: 115, Sample	Found in Sample: [S100] F12: 116, Sample	Found in Sample: [S101] F12: 117, Sample	Found in Sample: [S102] F12: 118, Sample	Found in Sample: [S103] F12: 119, Sample	Found in Sample: [S104] F12: 121, Sample	Percolator PEP (by Search Engine): Sequest HT	XCorr (by Search Engine): Sequest HT	Sequence in Protein	Positions in Protein	Peptide Group Modifications in Protein	Quan Usage
FALSE	[R].FGPFIGK.[I]		1	0.868645	1	1	6	c65261_g1	c65261_g1 [88-94]	0	765.429	0														No Quan Labels	Low	Low	Low	Low	Low	Low	Not Found	1	0.58	R.FGPFIGK.I	[88-94]		Not Used
	Confidence	PSM Ambiguity	Annotated Sequence	Modifications	# Protein Groups	# Proteins	Master Protein Accessions	Protein Accessions	# Missed Cleavages	Charge	DeltaScore	DeltaCn	Rank	m/z [Da]	MH+ [Da]	Theo. MH+ [Da]	DeltaM [ppm]	Deltam/z [Da]	Activation Type	MS Order	Isolation Interference [%]	Average Reporter S/N	Ion Inject Time [ms]	RT [min]	First Scan	Spectrum File	Abundance: 113	Abundance: 114	Abundance: 115	Abundance: 116	Abundance: 117	Abundance: 118	Abundance: 119	XCorr	Percolator q-Value	Percolator PEP
	Low	Unambiguous	[R].FGPFIGK.[I]		1	1	c65261_g1	c65261_g1	0	2	0.0541	0	1	383.215	765.423	765.429	-8.56	-0.00327	HCD (High Energy Collision Dissociation)	MS2	45.0404	15.2	50	8.8893	1922	SHUTSA.raw	60.7	10.3	9	10.3	13.4	8.5	9.1	0.37	0.8974	1
	Low	Unambiguous	[R].FGPFIGK.[I]		1	1	c65261_g1	c65261_g1	0	2	0.0682	0	1	383.215	765.423	765.429	-8.64	-0.00331	HCD (High Energy Collision Dissociation)	MS2	51.5794	13.7	20.371	20.6729	4673	SHUTSA.raw	32.7	11.6	11.2	16.8	12.9	16.7	8	0.44	0.9039	1
	Low	Unambiguous	[R].FGPFIGK.[I]		1	1	c65261_g1	c65261_g1	0	2	0.1304	0	1	383.215	765.423	765.429	-8.4	-0.00321	HCD (High Energy Collision Dissociation)	MS2	52.5686	15.5	25.377	19.4777	4333	SHUTSA.raw	27.4	6.8	12	22.4	22.5	23	9.9	0.46	0.9039	1
	Low	Selected	[R].FGPFIGK.[I]		1	1	c65261_g1	c65261_g1	0	2	0.0256	0	1	383.215	765.422	765.429	-9.51	-0.00364	HCD (High Energy Collision Dissociation)	MS2	53.273	14.5	22.401	7.9778	1698	SHUTSA.raw	51.1	6.7	12.2	12.6	15.8	11.2	6.4	0.39	0.9301	1
	Low	Unambiguous	[R].FGPFIGK.[I]		1	1	c65261_g1	c65261_g1	0	2	0.1034	0	1	383.215	765.422	765.429	-9.75	-0.00373	HCD (High Energy Collision Dissociation)	MS2	24.8633	21.9	42.26	20.3299	4570	SHUTSA.raw	47.3	16.9	14.3	32.1	24.5	27.4	12.4	0.58	0.9525	1
	Low	Selected	[R].FGPFIGK.[I]		1	1	c65261_g1	c65261_g1	0	2	0.0444	0	1	383.215	765.422	765.429	-9.99	-0.00382	HCD (High Energy Collision Dissociation)	MS2	38.0403	13.3	33.242	72.6648	18409	SHUTSA.raw	24.6	2.5	11.1	22.8	25.2	14.6	5.4	0.45	0.9552	1
High	c87201_g1	0.117	0	3	1	1	1	1	267	29.6	8.37	0	1	0.302	0.879	0.664	0.311	0.295	0.271	215	64.9	188.9	142.7	66.8	63.4	58.3	Low	Low	Low	Low	Low	Low	Low
Checked	Annotated Sequence	Modifications in Master Proteins	Qvality PEP	Qvality q-value	# Protein Groups	# Proteins	# PSMs	Master Protein Accessions	Positions in Master Proteins	# Missed Cleavages	Theo. MH+ [Da]	# Razor Quan Results	Abundance Ratio: (114) / (113)	Abundance Ratio: (116) / (113)	Abundance Ratio: (117) / (113)	Abundance Ratio: (118) / (113)	Abundance Ratio: (119) / (113)	Abundances (Grouped): 113	Abundances (Grouped): 114	Abundances (Grouped): 115	Abundances (Grouped): 116	Abundances (Grouped): 117	Abundances (Grouped): 118	Abundances (Grouped): 119	Abundances (Grouped): 121	Quan Info	Found in Sample: [S98] F12: 114, Sample	Found in Sample: [S99] F12: 115, Sample	Found in Sample: [S100] F12: 116, Sample	Found in Sample: [S101] F12: 117, Sample	Found in Sample: [S102] F12: 118, Sample	Found in Sample: [S103] F12: 119, Sample	Found in Sample: [S104] F12: 121, Sample	Percolator PEP (by Search Engine): Sequest HT	XCorr (by Search Engine): Sequest HT	Sequence in Protein	Positions in Protein	Peptide Group Modifications in Protein	Quan Usage
FALSE	[R].ETAETSK.[G]		1	0.944118	1	1	1	c87201_g1	c87201_g1 [223-229]	0	1069.57	1	0.302	0.664	0.311	0.295	0.271	215	64.9	188.9	142.7	66.8	63.4	58.3			Low	Low	Low	Low	Low	Low	Not Found	1	0.76	R.ETAETSK.G	[223-229]		Used
	Confidence	PSM Ambiguity	Annotated Sequence	Modifications	# Protein Groups	# Proteins	Master Protein Accessions	Protein Accessions	# Missed Cleavages	Charge	DeltaScore	DeltaCn	Rank	m/z [Da]	MH+ [Da]	Theo. MH+ [Da]	DeltaM [ppm]	Deltam/z [Da]	Activation Type	MS Order	Isolation Interference [%]	Average Reporter S/N	Ion Inject Time [ms]	RT [min]	First Scan	Spectrum File	Abundance: 113	Abundance: 114	Abundance: 115	Abundance: 116	Abundance: 117	Abundance: 118	Abundance: 119	XCorr	Percolator q-Value	Percolator PEP
	Low	Selected	[R].eTAETSK.[G]	N-Term(iTRAQ8plex)	1	1	c87201_g1	c87201_g1	0	2	0.0132	0	1	535.289	1069.57	1069.57	1.89	0.00101	HCD (High Energy Collision Dissociation)	MS2	38.5381	12.4	50	48.4412	12343	SHUTSA.raw	28.6	7.7	28.2	14.2	6.4	7.2	6.8	0.76	0.9536	1
High	c68564_g2	0.073	0	2	1	4	1	1	484	52.8	8.07	0	1														Low	Low	Low	Low	Low	Low	Low
Checked	Annotated Sequence	Modifications in Master Proteins	Qvality PEP	Qvality q-value	# Protein Groups	# Proteins	# PSMs	Master Protein Accessions	Positions in Master Proteins	# Missed Cleavages	Theo. MH+ [Da]	# Razor Quan Results	Abundance Ratio: (114) / (113)	Abundance Ratio: (116) / (113)	Abundance Ratio: (117) / (113)	Abundance Ratio: (118) / (113)	Abundance Ratio: (119) / (113)	Abundances (Grouped): 113	Abundances (Grouped): 114	Abundances (Grouped): 115	Abundances (Grouped): 116	Abundances (Grouped): 117	Abundances (Grouped): 118	Abundances (Grouped): 119	Abundances (Grouped): 121	Quan Info	Found in Sample: [S98] F12: 114, Sample	Found in Sample: [S99] F12: 115, Sample	Found in Sample: [S100] F12: 116, Sample	Found in Sample: [S101] F12: 117, Sample	Found in Sample: [S102] F12: 118, Sample	Found in Sample: [S103] F12: 119, Sample	Found in Sample: [S104] F12: 121, Sample	Percolator PEP (by Search Engine): Sequest HT	XCorr (by Search Engine): Sequest HT	Sequence in Protein	Positions in Protein	Peptide Group Modifications in Protein	Quan Usage
FALSE	[K].GTKVIGAK.[S]		1	0.855853	1	1	4	c68564_g2	c68564_g2 [51-58]	1	773.488	0														No Quan Labels	Low	Low	Low	Low	Low	Low	Not Found	1	0.38	K.GTKVIGAK.S	[51-58]		Not Used
	Confidence	PSM Ambiguity	Annotated Sequence	Modifications	# Protein Groups	# Proteins	Master Protein Accessions	Protein Accessions	# Missed Cleavages	Charge	DeltaScore	DeltaCn	Rank	m/z [Da]	MH+ [Da]	Theo. MH+ [Da]	DeltaM [ppm]	Deltam/z [Da]	Activation Type	MS Order	Isolation Interference [%]	Average Reporter S/N	Ion Inject Time [ms]	RT [min]	First Scan	Spectrum File	Abundance: 113	Abundance: 114	Abundance: 115	Abundance: 116	Abundance: 117	Abundance: 118	Abundance: 119	XCorr	Percolator q-Value	Percolator PEP
	Low	Rejected	[K].GTKVIGAK.[S]		1	1	c68564_g2	c68564_g2	1	2		0.05	3	387.251	773.495	773.488	9.07	0.00351	HCD (High Energy Collision Dissociation)	MS2	23.1741	10.9	50	52.6275	13374	SHUTSA.raw	15.2	13.8	22.3	11.2	10.1	7.9	6.8	0.38	0.8974	1
	Low	Selected	[K].GTKVIGAK.[S]		1	1	c68564_g2	c68564_g2	1	2	0	0	1	387.25	773.493	773.488	7.1	0.00275	HCD (High Energy Collision Dissociation)	MS2	22.6424	8.1	50	68.5654	17144	SHUTSA.raw	11.6	6.4	14.6	10	7.9	8.2	6.3	0.26	0.8974	1
	Low	Rejected	[K].GTKVIGAK.[S]		1	1	c68564_g2	c68564_g2	1	2		0.0303	5	387.25	773.493	773.488	6.47	0.0025	HCD (High Energy Collision Dissociation)	MS2	0	7.9	50	41.5778	10635	SHUTSA.raw	8.9	7.4	17.8	7.9	7.6	7.5	6.3	0.32	0.9187	1
	Low	Selected	[K].GTKVIGAK.[S]		1	1	c68564_g2	c68564_g2	1	2	0	0	1	387.251	773.494	773.488	7.89	0.00305	HCD (High Energy Collision Dissociation)	MS2	0	5.2	50	70.7581	17805	SHUTSA.raw	8.2	7.7	10.2	4.8	4.3	3.8	2.6	0.28	0.9272	1
High	c102999_g1	0.075	0	13	1	1	1	1	88	10.3	5.24	0	1														Low	Low	Low	Low	Low	Low	Low
Checked	Annotated Sequence	Modifications in Master Proteins	Qvality PEP	Qvality q-value	# Protein Groups	# Proteins	# PSMs	Master Protein Accessions	Positions in Master Proteins	# Missed Cleavages	Theo. MH+ [Da]	# Razor Quan Results	Abundance Ratio: (114) / (113)	Abundance Ratio: (116) / (113)	Abundance Ratio: (117) / (113)	Abundance Ratio: (118) / (113)	Abundance Ratio: (119) / (113)	Abundances (Grouped): 113	Abundances (Grouped): 114	Abundances (Grouped): 115	Abundances (Grouped): 116	Abundances (Grouped): 117	Abundances (Grouped): 118	Abundances (Grouped): 119	Abundances (Grouped): 121	Quan Info	Found in Sample: [S98] F12: 114, Sample	Found in Sample: [S99] F12: 115, Sample	Found in Sample: [S100] F12: 116, Sample	Found in Sample: [S101] F12: 117, Sample	Found in Sample: [S102] F12: 118, Sample	Found in Sample: [S103] F12: 119, Sample	Found in Sample: [S104] F12: 121, Sample	Percolator PEP (by Search Engine): Sequest HT	XCorr (by Search Engine): Sequest HT	Sequence in Protein	Positions in Protein	Peptide Group Modifications in Protein	Quan Usage
FALSE	[R].TKGVLAVQGMK.[-]		1	0.855853	1	1	1	c102999_g1	c102999_g1 [78-88]	1	1131.66	0														No Quan Labels	Low	Low	Low	Low	Low	Low	Not Found	1	0.5	R.TKGVLAVQGMK.-	[78-88]		Not Used
	Confidence	PSM Ambiguity	Annotated Sequence	Modifications	# Protein Groups	# Proteins	Master Protein Accessions	Protein Accessions	# Missed Cleavages	Charge	DeltaScore	DeltaCn	Rank	m/z [Da]	MH+ [Da]	Theo. MH+ [Da]	DeltaM [ppm]	Deltam/z [Da]	Activation Type	MS Order	Isolation Interference [%]	Average Reporter S/N	Ion Inject Time [ms]	RT [min]	First Scan	Spectrum File	Abundance: 113	Abundance: 114	Abundance: 115	Abundance: 116	Abundance: 117	Abundance: 118	Abundance: 119	XCorr	Percolator q-Value	Percolator PEP
	Low	Unambiguous	[R].TKGVLAVQGMK.[-]		1	1	c102999_g1	c102999_g1	1	2	0.16	0	1	566.334	1131.66	1131.66	5.29	0.00299	HCD (High Energy Collision Dissociation)	MS2	16.5168	14.2	50	35.8033	9124	SHUTSA.raw	29.3	17.7	13.4	11.4	7.1	18.2	16.5	0.5	0.8974	1
High	c182983_g1	0.075	0	2	1	2	1	1	365	41.1	4.41	0	1														Low	Low	Low	Low	Low	Low	Low
Checked	Annotated Sequence	Modifications in Master Proteins	Qvality PEP	Qvality q-value	# Protein Groups	# Proteins	# PSMs	Master Protein Accessions	Positions in Master Proteins	# Missed Cleavages	Theo. MH+ [Da]	# Razor Quan Results	Abundance Ratio: (114) / (113)	Abundance Ratio: (116) / (113)	Abundance Ratio: (117) / (113)	Abundance Ratio: (118) / (113)	Abundance Ratio: (119) / (113)	Abundances (Grouped): 113	Abundances (Grouped): 114	Abundances (Grouped): 115	Abundances (Grouped): 116	Abundances (Grouped): 117	Abundances (Grouped): 118	Abundances (Grouped): 119	Abundances (Grouped): 121	Quan Info	Found in Sample: [S98] F12: 114, Sample	Found in Sample: [S99] F12: 115, Sample	Found in Sample: [S100] F12: 116, Sample	Found in Sample: [S101] F12: 117, Sample	Found in Sample: [S102] F12: 118, Sample	Found in Sample: [S103] F12: 119, Sample	Found in Sample: [S104] F12: 121, Sample	Percolator PEP (by Search Engine): Sequest HT	XCorr (by Search Engine): Sequest HT	Sequence in Protein	Positions in Protein	Peptide Group Modifications in Protein	Quan Usage
FALSE	[R].SKAYATFDK.[H]		1	0.846029	1	1	2	c182983_g1	c182983_g1 [223-231]	1	1334.73	0														No Quan Values	Low	Low	Low	Low	Low	Low	Not Found	1	0.43	R.SKAYATFDK.H	[223-231]		Not Used
	Confidence	PSM Ambiguity	Annotated Sequence	Modifications	# Protein Groups	# Proteins	Master Protein Accessions	Protein Accessions	# Missed Cleavages	Charge	DeltaScore	DeltaCn	Rank	m/z [Da]	MH+ [Da]	Theo. MH+ [Da]	DeltaM [ppm]	Deltam/z [Da]	Activation Type	MS Order	Isolation Interference [%]	Average Reporter S/N	Ion Inject Time [ms]	RT [min]	First Scan	Spectrum File	Abundance: 113	Abundance: 114	Abundance: 115	Abundance: 116	Abundance: 117	Abundance: 118	Abundance: 119	XCorr	Percolator q-Value	Percolator PEP
	Low	Unambiguous	[R].SKAYATFDk.[H]	K9(iTRAQ8plex)	1	1	c182983_g1	c182983_g1	1	2	0.1026	0	1	667.865	1334.72	1334.73	-3.01	-0.00201	HCD (High Energy Collision Dissociation)	MS2	40.1928	1	50	57.9312	14621	SHUTSA.raw	2.6		3.7		1.8			0.39	0.8974	1
	Low	Unambiguous	[R].SKAYATFDk.[H]	K9(iTRAQ8plex)	1	1	c182983_g1	c182983_g1	1	2	0.1628	0	1	667.865	1334.72	1334.73	-2.46	-0.00164	HCD (High Energy Collision Dissociation)	MS2		2.7	50	57.2226	14446	SHUTSA.raw	4.8	2.5	4.4	2.3	1.9	2.4	3.1	0.43	0.9015	1
High	c182866_g1	0.075	0	7	1	2	1	1	101	11.4	4.98	0	1														Low	Low	Low	Low	Low	Low	Low
Checked	Annotated Sequence	Modifications in Master Proteins	Qvality PEP	Qvality q-value	# Protein Groups	# Proteins	# PSMs	Master Protein Accessions	Positions in Master Proteins	# Missed Cleavages	Theo. MH+ [Da]	# Razor Quan Results	Abundance Ratio: (114) / (113)	Abundance Ratio: (116) / (113)	Abundance Ratio: (117) / (113)	Abundance Ratio: (118) / (113)	Abundance Ratio: (119) / (113)	Abundances (Grouped): 113	Abundances (Grouped): 114	Abundances (Grouped): 115	Abundances (Grouped): 116	Abundances (Grouped): 117	Abundances (Grouped): 118	Abundances (Grouped): 119	Abundances (Grouped): 121	Quan Info	Found in Sample: [S98] F12: 114, Sample	Found in Sample: [S99] F12: 115, Sample	Found in Sample: [S100] F12: 116, Sample	Found in Sample: [S101] F12: 117, Sample	Found in Sample: [S102] F12: 118, Sample	Found in Sample: [S103] F12: 119, Sample	Found in Sample: [S104] F12: 121, Sample	Percolator PEP (by Search Engine): Sequest HT	XCorr (by Search Engine): Sequest HT	Sequence in Protein	Positions in Protein	Peptide Group Modifications in Protein	Quan Usage
FALSE	[R].IELMLER.[L]		1	0.844476	1	1	2	c182866_g1	c182866_g1 [51-57]	0	919.492	0														No Quan Labels	Low	Low	Low	Low	Low	Low	Not Found	1	0.57	R.IELMLER.L	[51-57]		Not Used
	Confidence	PSM Ambiguity	Annotated Sequence	Modifications	# Protein Groups	# Proteins	Master Protein Accessions	Protein Accessions	# Missed Cleavages	Charge	DeltaScore	DeltaCn	Rank	m/z [Da]	MH+ [Da]	Theo. MH+ [Da]	DeltaM [ppm]	Deltam/z [Da]	Activation Type	MS Order	Isolation Interference [%]	Average Reporter S/N	Ion Inject Time [ms]	RT [min]	First Scan	Spectrum File	Abundance: 113	Abundance: 114	Abundance: 115	Abundance: 116	Abundance: 117	Abundance: 118	Abundance: 119	XCorr	Percolator q-Value	Percolator PEP
	Low	Selected	[R].IELmLER.[L]	M4(Oxidation)	1	1	c182866_g1	c182866_g1	0	2	0	0	1	460.25	919.493	919.492	0.95	0.00044	HCD (High Energy Collision Dissociation)	MS2	45.6611	41.4	50	10.9888	2367	SHUTSA.raw	71	41.6	185.9	12.9	6.9	7	5.6	0.53	0.8856	1
	Low	Selected	[R].IELmLER.[L]	M4(Oxidation)	1	1	c182866_g1	c182866_g1	0	2	0	0	1	460.25	919.492	919.492	0.68	0.00031	HCD (High Energy Collision Dissociation)	MS2	26.6897	36	50	13.4944	2931	SHUTSA.raw	56.7	35.4	161.3	12.7	4.5	10.3	7.4	0.57	0.8974	1
High	c10674_g1	0.072	0	2	1	1	1	1	484	54.1	5.4	0	1														Low	Low	Low	Low	Low	Low	Low
Checked	Annotated Sequence	Modifications in Master Proteins	Qvality PEP	Qvality q-value	# Protein Groups	# Proteins	# PSMs	Master Protein Accessions	Positions in Master Proteins	# Missed Cleavages	Theo. MH+ [Da]	# Razor Quan Results	Abundance Ratio: (114) / (113)	Abundance Ratio: (116) / (113)	Abundance Ratio: (117) / (113)	Abundance Ratio: (118) / (113)	Abundance Ratio: (119) / (113)	Abundances (Grouped): 113	Abundances (Grouped): 114	Abundances (Grouped): 115	Abundances (Grouped): 116	Abundances (Grouped): 117	Abundances (Grouped): 118	Abundances (Grouped): 119	Abundances (Grouped): 121	Quan Info	Found in Sample: [S98] F12: 114, Sample	Found in Sample: [S99] F12: 115, Sample	Found in Sample: [S100] F12: 116, Sample	Found in Sample: [S101] F12: 117, Sample	Found in Sample: [S102] F12: 118, Sample	Found in Sample: [S103] F12: 119, Sample	Found in Sample: [S104] F12: 121, Sample	Percolator PEP (by Search Engine): Sequest HT	XCorr (by Search Engine): Sequest HT	Sequence in Protein	Positions in Protein	Peptide Group Modifications in Protein	Quan Usage
FALSE	[R].LAPDGQPSK.[R]		1	0.901167	1	1	1	c10674_g1	c10674_g1 [272-280]	0	912.479	0														No Quan Labels	Low	Low	Low	Low	Low	Low	Not Found	1	0.59	R.LAPDGQPSK.R	[272-280]		Not Used
	Confidence	PSM Ambiguity	Annotated Sequence	Modifications	# Protein Groups	# Proteins	Master Protein Accessions	Protein Accessions	# Missed Cleavages	Charge	DeltaScore	DeltaCn	Rank	m/z [Da]	MH+ [Da]	Theo. MH+ [Da]	DeltaM [ppm]	Deltam/z [Da]	Activation Type	MS Order	Isolation Interference [%]	Average Reporter S/N	Ion Inject Time [ms]	RT [min]	First Scan	Spectrum File	Abundance: 113	Abundance: 114	Abundance: 115	Abundance: 116	Abundance: 117	Abundance: 118	Abundance: 119	XCorr	Percolator q-Value	Percolator PEP
	Low	Selected	[R].LAPDGQPSK.[R]		1	1	c10674_g1	c10674_g1	0	2	0.0339	0	1	456.744	912.48	912.479	2.05	0.00094	HCD (High Energy Collision Dissociation)	MS2	58.2898	22.9	50	27.2782	6785	SHUTSA.raw	38.1	36.7	24	10.7	23.5	21.4	28.9	0.59	0.9041	1
High	c162723_g1	0.076	0	7	1	8	1	1	164	18	9.89	0	1														Low	Low	Low	Low	Low	Low	Low
Checked	Annotated Sequence	Modifications in Master Proteins	Qvality PEP	Qvality q-value	# Protein Groups	# Proteins	# PSMs	Master Protein Accessions	Positions in Master Proteins	# Missed Cleavages	Theo. MH+ [Da]	# Razor Quan Results	Abundance Ratio: (114) / (113)	Abundance Ratio: (116) / (113)	Abundance Ratio: (117) / (113)	Abundance Ratio: (118) / (113)	Abundance Ratio: (119) / (113)	Abundances (Grouped): 113	Abundances (Grouped): 114	Abundances (Grouped): 115	Abundances (Grouped): 116	Abundances (Grouped): 117	Abundances (Grouped): 118	Abundances (Grouped): 119	Abundances (Grouped): 121	Quan Info	Found in Sample: [S98] F12: 114, Sample	Found in Sample: [S99] F12: 115, Sample	Found in Sample: [S100] F12: 116, Sample	Found in Sample: [S101] F12: 117, Sample	Found in Sample: [S102] F12: 118, Sample	Found in Sample: [S103] F12: 119, Sample	Found in Sample: [S104] F12: 121, Sample	Percolator PEP (by Search Engine): Sequest HT	XCorr (by Search Engine): Sequest HT	Sequence in Protein	Positions in Protein	Peptide Group Modifications in Protein	Quan Usage
FALSE	[R].SGLGVLLSSRER.[G]		1	0.844476	1	1	8	c162723_g1	c162723_g1 [102-113]	1	1273.72	0														No Quan Labels	Low	Low	Low	Low	Low	Low	Not Found	1	0.72	R.SGLGVLLSSRER.G	[102-113]		Not Used
	Confidence	PSM Ambiguity	Annotated Sequence	Modifications	# Protein Groups	# Proteins	Master Protein Accessions	Protein Accessions	# Missed Cleavages	Charge	DeltaScore	DeltaCn	Rank	m/z [Da]	MH+ [Da]	Theo. MH+ [Da]	DeltaM [ppm]	Deltam/z [Da]	Activation Type	MS Order	Isolation Interference [%]	Average Reporter S/N	Ion Inject Time [ms]	RT [min]	First Scan	Spectrum File	Abundance: 113	Abundance: 114	Abundance: 115	Abundance: 116	Abundance: 117	Abundance: 118	Abundance: 119	XCorr	Percolator q-Value	Percolator PEP
	Low	Rejected	[R].SGLGVLLSSRER.[G]		1	1	c162723_g1	c162723_g1	1	2	0.0317	0	1	637.37	1273.73	1273.72	8.87	0.00565	HCD (High Energy Collision Dissociation)	MS2	26.008	1.5	50	72.2204	18266	SHUTSA.raw	2		4.1			2.4	3.2	0.63	0.8856	1
	Low	Rejected	[R].SGLGVLLSSRER.[G]		1	1	c162723_g1	c162723_g1	1	2		0	2	637.37	1273.73	1273.72	8.39	0.00534	HCD (High Energy Collision Dissociation)	MS2	40.6476	4.4	50	62.5469	15710	SHUTSA.raw	4	2.9	4.8	3.5	2.5	11.6	5.8	0.71	0.8856	1
	Low	Rejected	[R].SGLGVLLSSRER.[G]		1	1	c162723_g1	c162723_g1	1	2		0.0462	2	637.368	1273.73	1273.72	5.8	0.00369	HCD (High Energy Collision Dissociation)	MS2	0	2	50	46.3887	11814	SHUTSA.raw	2.3	2.9	4.1			3.6	2.9	0.62	0.8974	1
	Low	Selected	[R].SGLGVLLSSRER.[G]		1	1	c162723_g1	c162723_g1	1	2	0	0	1	637.37	1273.73	1273.72	8.87	0.00565	HCD (High Energy Collision Dissociation)	MS2	26.6491	1.4	50	65.0705	16255	SHUTSA.raw	3.7	2.8	2.5	2.3				0.67	0.8974	1
	Low	Rejected	[R].SGLGVLLSSRER.[G]		1	1	c162723_g1	c162723_g1	1	2		0	2	637.37	1273.73	1273.72	8.58	0.00546	HCD (High Energy Collision Dissociation)	MS2	0	10.6	50	21.3315	4910	SHUTSA.raw	14.4	21.8	15.5	8.1	10.4	7.6	7.4	0.54	0.9015	1
	Low	Selected	[R].SGLGVLLSSRER.[G]		1	1	c162723_g1	c162723_g1	1	2	0.0278	0	1	637.37	1273.73	1273.72	8.48	0.0054	HCD (High Energy Collision Dissociation)	MS2	26.6266	4.1	50	37.9918	9712	SHUTSA.raw	8	4.4	7.1	3.2	3.2	3.8	3.1	0.72	0.9041	1
	Low	Selected	[R].SGLGVLLSSRER.[G]		1	1	c162723_g1	c162723_g1	1	2	0.0299	0	1	637.37	1273.73	1273.72	8.39	0.00534	HCD (High Energy Collision Dissociation)	MS2	21.6035	2.4	50	64.8783	16214	SHUTSA.raw	3.1		4.1	3		5.5	3.4	0.67	0.9101	1
	Low	Rejected	[R].SGLGVLLSSRER.[G]		1	1	c162723_g1	c162723_g1	1	2	0.0143	0	1	637.37	1273.73	1273.72	8.2	0.00522	HCD (High Energy Collision Dissociation)	MS2	20.2592	4.9	50	38.1622	9757	SHUTSA.raw	6.3	4.3	5.9	4.5	4.5	8.4	5.3	0.7	0.9301	1
High	c69360_g1	0.077	0	8	1	1	1	1	102	11.6	7.68	0	1														Low	Low	Low	Low	Low	Low	Low
Checked	Annotated Sequence	Modifications in Master Proteins	Qvality PEP	Qvality q-value	# Protein Groups	# Proteins	# PSMs	Master Protein Accessions	Positions in Master Proteins	# Missed Cleavages	Theo. MH+ [Da]	# Razor Quan Results	Abundance Ratio: (114) / (113)	Abundance Ratio: (116) / (113)	Abundance Ratio: (117) / (113)	Abundance Ratio: (118) / (113)	Abundance Ratio: (119) / (113)	Abundances (Grouped): 113	Abundances (Grouped): 114	Abundances (Grouped): 115	Abundances (Grouped): 116	Abundances (Grouped): 117	Abundances (Grouped): 118	Abundances (Grouped): 119	Abundances (Grouped): 121	Quan Info	Found in Sample: [S98] F12: 114, Sample	Found in Sample: [S99] F12: 115, Sample	Found in Sample: [S100] F12: 116, Sample	Found in Sample: [S101] F12: 117, Sample	Found in Sample: [S102] F12: 118, Sample	Found in Sample: [S103] F12: 119, Sample	Found in Sample: [S104] F12: 121, Sample	Percolator PEP (by Search Engine): Sequest HT	XCorr (by Search Engine): Sequest HT	Sequence in Protein	Positions in Protein	Peptide Group Modifications in Protein	Quan Usage
FALSE	[K].LGELNQAK.[D]		1	0.921339	1	1	1	c69360_g1	c69360_g1 [37-44]	0	872.484	0														No Quan Labels	Low	Low	Low	Low	Low	Low	Not Found	1	0.55	K.LGELNQAK.D	[37-44]		Not Used
	Confidence	PSM Ambiguity	Annotated Sequence	Modifications	# Protein Groups	# Proteins	Master Protein Accessions	Protein Accessions	# Missed Cleavages	Charge	DeltaScore	DeltaCn	Rank	m/z [Da]	MH+ [Da]	Theo. MH+ [Da]	DeltaM [ppm]	Deltam/z [Da]	Activation Type	MS Order	Isolation Interference [%]	Average Reporter S/N	Ion Inject Time [ms]	RT [min]	First Scan	Spectrum File	Abundance: 113	Abundance: 114	Abundance: 115	Abundance: 116	Abundance: 117	Abundance: 118	Abundance: 119	XCorr	Percolator q-Value	Percolator PEP
	Low	Unambiguous	[K].LGELNQAK.[D]		1	1	c69360_g1	c69360_g1	0	2	0.1091	0	1	436.743	872.479	872.484	-5.01	-0.00219	HCD (High Energy Collision Dissociation)	MS2	33.4657	23.6	50	73.6132	18681	SHUTSA.raw	25.6	31.5	31	25.6	22	28.9	24.1	0.55	0.9187	1
High	c52485_g1	0.077	0	3	1	1	1	1	462	51.6	5.83	0	1														Low	Not Found	Not Found	Not Found	Not Found	Not Found	Not Found
Checked	Annotated Sequence	Modifications in Master Proteins	Qvality PEP	Qvality q-value	# Protein Groups	# Proteins	# PSMs	Master Protein Accessions	Positions in Master Proteins	# Missed Cleavages	Theo. MH+ [Da]	# Razor Quan Results	Abundance Ratio: (114) / (113)	Abundance Ratio: (116) / (113)	Abundance Ratio: (117) / (113)	Abundance Ratio: (118) / (113)	Abundance Ratio: (119) / (113)	Abundances (Grouped): 113	Abundances (Grouped): 114	Abundances (Grouped): 115	Abundances (Grouped): 116	Abundances (Grouped): 117	Abundances (Grouped): 118	Abundances (Grouped): 119	Abundances (Grouped): 121	Quan Info	Found in Sample: [S98] F12: 114, Sample	Found in Sample: [S99] F12: 115, Sample	Found in Sample: [S100] F12: 116, Sample	Found in Sample: [S101] F12: 117, Sample	Found in Sample: [S102] F12: 118, Sample	Found in Sample: [S103] F12: 119, Sample	Found in Sample: [S104] F12: 121, Sample	Percolator PEP (by Search Engine): Sequest HT	XCorr (by Search Engine): Sequest HT	Sequence in Protein	Positions in Protein	Peptide Group Modifications in Protein	Quan Usage
FALSE	[K].ASMSILQLLLAK.[G]		1	0.911537	1	1	1	c52485_g1	c52485_g1 [267-278]	0	1303.77	0														No Quan Labels	Not Found	Not Found	Not Found	Not Found	Not Found	Not Found	Not Found	1	0.52	K.ASMSILQLLLAK.G	[267-278]		Not Used
	Confidence	PSM Ambiguity	Annotated Sequence	Modifications	# Protein Groups	# Proteins	Master Protein Accessions	Protein Accessions	# Missed Cleavages	Charge	DeltaScore	DeltaCn	Rank	m/z [Da]	MH+ [Da]	Theo. MH+ [Da]	DeltaM [ppm]	Deltam/z [Da]	Activation Type	MS Order	Isolation Interference [%]	Average Reporter S/N	Ion Inject Time [ms]	RT [min]	First Scan	Spectrum File	Abundance: 113	Abundance: 114	Abundance: 115	Abundance: 116	Abundance: 117	Abundance: 118	Abundance: 119	XCorr	Percolator q-Value	Percolator PEP
	Low	Selected	[K].ASmSILQLLLAK.[G]	M3(Oxidation)	1	1	c52485_g1	c52485_g1	0	2	0.0385	0	1	652.386	1303.76	1303.77	-0.34	-0.00022	HCD (High Energy Collision Dissociation)	MS2	25.3287	0.6	50	71.1992	17946	SHUTSA.raw	5							0.52	0.9096	1
High	c81697_g1	0.078	0	4	1	1	1	1	213	22.8	8.07	0	1														Low	Low	Low	Low	Low	Low	Low
Checked	Annotated Sequence	Modifications in Master Proteins	Qvality PEP	Qvality q-value	# Protein Groups	# Proteins	# PSMs	Master Protein Accessions	Positions in Master Proteins	# Missed Cleavages	Theo. MH+ [Da]	# Razor Quan Results	Abundance Ratio: (114) / (113)	Abundance Ratio: (116) / (113)	Abundance Ratio: (117) / (113)	Abundance Ratio: (118) / (113)	Abundance Ratio: (119) / (113)	Abundances (Grouped): 113	Abundances (Grouped): 114	Abundances (Grouped): 115	Abundances (Grouped): 116	Abundances (Grouped): 117	Abundances (Grouped): 118	Abundances (Grouped): 119	Abundances (Grouped): 121	Quan Info	Found in Sample: [S98] F12: 114, Sample	Found in Sample: [S99] F12: 115, Sample	Found in Sample: [S100] F12: 116, Sample	Found in Sample: [S101] F12: 117, Sample	Found in Sample: [S102] F12: 118, Sample	Found in Sample: [S103] F12: 119, Sample	Found in Sample: [S104] F12: 121, Sample	Percolator PEP (by Search Engine): Sequest HT	XCorr (by Search Engine): Sequest HT	Sequence in Protein	Positions in Protein	Peptide Group Modifications in Protein	Quan Usage
FALSE	[K].HLTGFFKR.[G]		1	0.913967	1	1	1	c81697_g1	c81697_g1 [121-128]	1	1005.56	0														No Quan Labels	Low	Low	Low	Low	Low	Low	Not Found	1	0.44	K.HLTGFFKR.G	[121-128]		Not Used
	Confidence	PSM Ambiguity	Annotated Sequence	Modifications	# Protein Groups	# Proteins	Master Protein Accessions	Protein Accessions	# Missed Cleavages	Charge	DeltaScore	DeltaCn	Rank	m/z [Da]	MH+ [Da]	Theo. MH+ [Da]	DeltaM [ppm]	Deltam/z [Da]	Activation Type	MS Order	Isolation Interference [%]	Average Reporter S/N	Ion Inject Time [ms]	RT [min]	First Scan	Spectrum File	Abundance: 113	Abundance: 114	Abundance: 115	Abundance: 116	Abundance: 117	Abundance: 118	Abundance: 119	XCorr	Percolator q-Value	Percolator PEP
	Low	Selected	[K].HLTGFFKR.[G]		1	1	c81697_g1	c81697_g1	1	2	0	0	1	503.284	1005.56	1005.56	-2.38	-0.00119	HCD (High Energy Collision Dissociation)	MS2		15.7	50	26.2623	6492	SHUTSA.raw	35.3	19.3	19.2	13.7	8.6	14.9	14.6	0.44	0.9101	1
High	c190852_g1	0.078	0	6	1	1	1	1	135	15.8	7.46	0	1														Low	Low	Low	Low	Low	Low	Low
Checked	Annotated Sequence	Modifications in Master Proteins	Qvality PEP	Qvality q-value	# Protein Groups	# Proteins	# PSMs	Master Protein Accessions	Positions in Master Proteins	# Missed Cleavages	Theo. MH+ [Da]	# Razor Quan Results	Abundance Ratio: (114) / (113)	Abundance Ratio: (116) / (113)	Abundance Ratio: (117) / (113)	Abundance Ratio: (118) / (113)	Abundance Ratio: (119) / (113)	Abundances (Grouped): 113	Abundances (Grouped): 114	Abundances (Grouped): 115	Abundances (Grouped): 116	Abundances (Grouped): 117	Abundances (Grouped): 118	Abundances (Grouped): 119	Abundances (Grouped): 121	Quan Info	Found in Sample: [S98] F12: 114, Sample	Found in Sample: [S99] F12: 115, Sample	Found in Sample: [S100] F12: 116, Sample	Found in Sample: [S101] F12: 117, Sample	Found in Sample: [S102] F12: 118, Sample	Found in Sample: [S103] F12: 119, Sample	Found in Sample: [S104] F12: 121, Sample	Percolator PEP (by Search Engine): Sequest HT	XCorr (by Search Engine): Sequest HT	Sequence in Protein	Positions in Protein	Peptide Group Modifications in Protein	Quan Usage
FALSE	[K].WSFPAGSR.[R]		1	0.844476	1	1	1	c190852_g1	c190852_g1 [56-63]	0	907.442	0														No Quan Labels	Low	Low	Low	Low	Low	Low	Not Found	1	0.47	K.WSFPAGSR.R	[56-63]		Not Used
	Confidence	PSM Ambiguity	Annotated Sequence	Modifications	# Protein Groups	# Proteins	Master Protein Accessions	Protein Accessions	# Missed Cleavages	Charge	DeltaScore	DeltaCn	Rank	m/z [Da]	MH+ [Da]	Theo. MH+ [Da]	DeltaM [ppm]	Deltam/z [Da]	Activation Type	MS Order	Isolation Interference [%]	Average Reporter S/N	Ion Inject Time [ms]	RT [min]	First Scan	Spectrum File	Abundance: 113	Abundance: 114	Abundance: 115	Abundance: 116	Abundance: 117	Abundance: 118	Abundance: 119	XCorr	Percolator q-Value	Percolator PEP
	Low	Unambiguous	[K].WSFPAGSR.[R]		1	1	c190852_g1	c190852_g1	0	2	0.2766	0	1	454.227	907.448	907.442	6.04	0.00274	HCD (High Energy Collision Dissociation)	MS2	37.7424	88.9	50	33.4706	8471	SHUTSA.raw	103.8	36.7	30.9	42.6	421.5	41.6	34.1	0.47	0.8974	1
High	c143138_g1	0.079	0	2	1	1	1	1	343	39.1	9.83	0	1														Low	Low	Low	Low	Low	Low	Low
Checked	Annotated Sequence	Modifications in Master Proteins	Qvality PEP	Qvality q-value	# Protein Groups	# Proteins	# PSMs	Master Protein Accessions	Positions in Master Proteins	# Missed Cleavages	Theo. MH+ [Da]	# Razor Quan Results	Abundance Ratio: (114) / (113)	Abundance Ratio: (116) / (113)	Abundance Ratio: (117) / (113)	Abundance Ratio: (118) / (113)	Abundance Ratio: (119) / (113)	Abundances (Grouped): 113	Abundances (Grouped): 114	Abundances (Grouped): 115	Abundances (Grouped): 116	Abundances (Grouped): 117	Abundances (Grouped): 118	Abundances (Grouped): 119	Abundances (Grouped): 121	Quan Info	Found in Sample: [S98] F12: 114, Sample	Found in Sample: [S99] F12: 115, Sample	Found in Sample: [S100] F12: 116, Sample	Found in Sample: [S101] F12: 117, Sample	Found in Sample: [S102] F12: 118, Sample	Found in Sample: [S103] F12: 119, Sample	Found in Sample: [S104] F12: 121, Sample	Percolator PEP (by Search Engine): Sequest HT	XCorr (by Search Engine): Sequest HT	Sequence in Protein	Positions in Protein	Peptide Group Modifications in Protein	Quan Usage
FALSE	[K].KVRLATK.[A]		1	0.926466	1	1	1	c143138_g1	c143138_g1 [319-325]	2	815.546	0														No Quan Labels	Low	Low	Low	Low	Low	Low	Not Found	1	0.52	K.KVRLATK.A	[319-325]		Not Used
	Confidence	PSM Ambiguity	Annotated Sequence	Modifications	# Protein Groups	# Proteins	Master Protein Accessions	Protein Accessions	# Missed Cleavages	Charge	DeltaScore	DeltaCn	Rank	m/z [Da]	MH+ [Da]	Theo. MH+ [Da]	DeltaM [ppm]	Deltam/z [Da]	Activation Type	MS Order	Isolation Interference [%]	Average Reporter S/N	Ion Inject Time [ms]	RT [min]	First Scan	Spectrum File	Abundance: 113	Abundance: 114	Abundance: 115	Abundance: 116	Abundance: 117	Abundance: 118	Abundance: 119	XCorr	Percolator q-Value	Percolator PEP
	Low	Unambiguous	[K].KVRLATK.[A]		1	1	c143138_g1	c143138_g1	2	2	0.0962	0	1	408.273	815.539	815.546	-8.26	-0.00337	HCD (High Energy Collision Dissociation)	MS2	0	40.3	50	48.5571	12370	SHUTSA.raw	64.6	35.8	51.9	51	40.4	35.9	42.4	0.52	0.9309	1
High	c31841_g1	0.08	0	2	1	1	1	1	528	57.3	6.35	0	1														Low	Low	Low	Low	Low	Low	Low
Checked	Annotated Sequence	Modifications in Master Proteins	Qvality PEP	Qvality q-value	# Protein Groups	# Proteins	# PSMs	Master Protein Accessions	Positions in Master Proteins	# Missed Cleavages	Theo. MH+ [Da]	# Razor Quan Results	Abundance Ratio: (114) / (113)	Abundance Ratio: (116) / (113)	Abundance Ratio: (117) / (113)	Abundance Ratio: (118) / (113)	Abundance Ratio: (119) / (113)	Abundances (Grouped): 113	Abundances (Grouped): 114	Abundances (Grouped): 115	Abundances (Grouped): 116	Abundances (Grouped): 117	Abundances (Grouped): 118	Abundances (Grouped): 119	Abundances (Grouped): 121	Quan Info	Found in Sample: [S98] F12: 114, Sample	Found in Sample: [S99] F12: 115, Sample	Found in Sample: [S100] F12: 116, Sample	Found in Sample: [S101] F12: 117, Sample	Found in Sample: [S102] F12: 118, Sample	Found in Sample: [S103] F12: 119, Sample	Found in Sample: [S104] F12: 121, Sample	Percolator PEP (by Search Engine): Sequest HT	XCorr (by Search Engine): Sequest HT	Sequence in Protein	Positions in Protein	Peptide Group Modifications in Protein	Quan Usage
FALSE	[R].MLLHVGSGR.[S]		1	0.88822	1	1	1	c31841_g1	c31841_g1 [275-283]	0	985.525	0														No Quan Labels	Low	Low	Low	Low	Low	Low	Low	1	0.45	R.MLLHVGSGR.S	[275-283]		Not Used
	Confidence	PSM Ambiguity	Annotated Sequence	Modifications	# Protein Groups	# Proteins	Master Protein Accessions	Protein Accessions	# Missed Cleavages	Charge	DeltaScore	DeltaCn	Rank	m/z [Da]	MH+ [Da]	Theo. MH+ [Da]	DeltaM [ppm]	Deltam/z [Da]	Activation Type	MS Order	Isolation Interference [%]	Average Reporter S/N	Ion Inject Time [ms]	RT [min]	First Scan	Spectrum File	Abundance: 113	Abundance: 114	Abundance: 115	Abundance: 116	Abundance: 117	Abundance: 118	Abundance: 119	XCorr	Percolator q-Value	Percolator PEP
	Low	Unambiguous	[R].mLLHVGSGR.[S]	M1(Oxidation)	1	1	c31841_g1	c31841_g1	0	2	0.1111	0	1	493.264	985.522	985.525	-3.21	-0.00158	HCD (High Energy Collision Dissociation)	MS2	65.0729	91	50	9.0536	1960	SHUTSA.raw	344	86	47.2	67.6	53.6	57.1	68.4	0.45	0.9039	1
High	c122306_g1	0.094	0	3	1	1	1	1	295	34.2	5.21	0	1														Low	Low	Low	Low	Low	Low	Low
Checked	Annotated Sequence	Modifications in Master Proteins	Qvality PEP	Qvality q-value	# Protein Groups	# Proteins	# PSMs	Master Protein Accessions	Positions in Master Proteins	# Missed Cleavages	Theo. MH+ [Da]	# Razor Quan Results	Abundance Ratio: (114) / (113)	Abundance Ratio: (116) / (113)	Abundance Ratio: (117) / (113)	Abundance Ratio: (118) / (113)	Abundance Ratio: (119) / (113)	Abundances (Grouped): 113	Abundances (Grouped): 114	Abundances (Grouped): 115	Abundances (Grouped): 116	Abundances (Grouped): 117	Abundances (Grouped): 118	Abundances (Grouped): 119	Abundances (Grouped): 121	Quan Info	Found in Sample: [S98] F12: 114, Sample	Found in Sample: [S99] F12: 115, Sample	Found in Sample: [S100] F12: 116, Sample	Found in Sample: [S101] F12: 117, Sample	Found in Sample: [S102] F12: 118, Sample	Found in Sample: [S103] F12: 119, Sample	Found in Sample: [S104] F12: 121, Sample	Percolator PEP (by Search Engine): Sequest HT	XCorr (by Search Engine): Sequest HT	Sequence in Protein	Positions in Protein	Peptide Group Modifications in Protein	Quan Usage
FALSE	[R].LSNGDNQR.[M]		1	0.936562	1	1	1	c122306_g1	c122306_g1 [66-73]	0	903.428	0														No Quan Labels	Low	Low	Low	Low	Low	Low	Not Found	1	0.51	R.LSNGDNQR.M	[66-73]		Not Used
	Confidence	PSM Ambiguity	Annotated Sequence	Modifications	# Protein Groups	# Proteins	Master Protein Accessions	Protein Accessions	# Missed Cleavages	Charge	DeltaScore	DeltaCn	Rank	m/z [Da]	MH+ [Da]	Theo. MH+ [Da]	DeltaM [ppm]	Deltam/z [Da]	Activation Type	MS Order	Isolation Interference [%]	Average Reporter S/N	Ion Inject Time [ms]	RT [min]	First Scan	Spectrum File	Abundance: 113	Abundance: 114	Abundance: 115	Abundance: 116	Abundance: 117	Abundance: 118	Abundance: 119	XCorr	Percolator q-Value	Percolator PEP
	Low	Selected	[R].LSNGDNQR.[M]		1	1	c122306_g1	c122306_g1	0	2	0.0196	0	1	452.218	903.429	903.428	0.97	0.00044	HCD (High Energy Collision Dissociation)	MS2	0	52.5	50	36.7822	9385	SHUTSA.raw	62	65.2	94.5	50.1	51.1	47.7	49.5	0.51	0.9461	1
High	c67838_g1	0.094	0	2	1	2	1	1	310	36.2	8.94	0	1														Low	Low	Low	Low	Low	Low	Low
Checked	Annotated Sequence	Modifications in Master Proteins	Qvality PEP	Qvality q-value	# Protein Groups	# Proteins	# PSMs	Master Protein Accessions	Positions in Master Proteins	# Missed Cleavages	Theo. MH+ [Da]	# Razor Quan Results	Abundance Ratio: (114) / (113)	Abundance Ratio: (116) / (113)	Abundance Ratio: (117) / (113)	Abundance Ratio: (118) / (113)	Abundance Ratio: (119) / (113)	Abundances (Grouped): 113	Abundances (Grouped): 114	Abundances (Grouped): 115	Abundances (Grouped): 116	Abundances (Grouped): 117	Abundances (Grouped): 118	Abundances (Grouped): 119	Abundances (Grouped): 121	Quan Info	Found in Sample: [S98] F12: 114, Sample	Found in Sample: [S99] F12: 115, Sample	Found in Sample: [S100] F12: 116, Sample	Found in Sample: [S101] F12: 117, Sample	Found in Sample: [S102] F12: 118, Sample	Found in Sample: [S103] F12: 119, Sample	Found in Sample: [S104] F12: 121, Sample	Percolator PEP (by Search Engine): Sequest HT	XCorr (by Search Engine): Sequest HT	Sequence in Protein	Positions in Protein	Peptide Group Modifications in Protein	Quan Usage
FALSE	[R].LAKKYR.[H]		1	0.933368	1	1	2	c67838_g1	c67838_g1 [90-95]	2	778.493	0														No Quan Labels	Low	Low	Low	Low	Low	Low	Not Found	1	0.83	R.LAKKYR.H	[90-95]		Not Used
	Confidence	PSM Ambiguity	Annotated Sequence	Modifications	# Protein Groups	# Proteins	Master Protein Accessions	Protein Accessions	# Missed Cleavages	Charge	DeltaScore	DeltaCn	Rank	m/z [Da]	MH+ [Da]	Theo. MH+ [Da]	DeltaM [ppm]	Deltam/z [Da]	Activation Type	MS Order	Isolation Interference [%]	Average Reporter S/N	Ion Inject Time [ms]	RT [min]	First Scan	Spectrum File	Abundance: 113	Abundance: 114	Abundance: 115	Abundance: 116	Abundance: 117	Abundance: 118	Abundance: 119	XCorr	Percolator q-Value	Percolator PEP
	Low	Unambiguous	[R].LAKKYR.[H]		1	1	c67838_g1	c67838_g1	2	2	0.2778	0	1	389.752	778.498	778.493	5.34	0.00208	HCD (High Energy Collision Dissociation)	MS2		21.1	50	52.0475	13237	SHUTSA.raw	42.5	28.1	27.3	24.4	15.2	16.5	14.6	0.54	0.9389	1
	Low	Rejected	[R].LAKKYR.[H]		1	1	c67838_g1	c67838_g1	2	2		0.0235	3	389.75	778.493	778.493	-0.77	-0.0003	HCD (High Energy Collision Dissociation)	MS2	60.1506	24.6	50	20.9948	4789	SHUTSA.raw	63.6	25.7	26.7	19.8	13.5	23	24.8	0.83	0.9536	1
High	c192492_g1	0.074	0	8	1	1	1	1	78	9	10.23	0	1														Low	Low	Low	Low	Low	Low	Low
Checked	Annotated Sequence	Modifications in Master Proteins	Qvality PEP	Qvality q-value	# Protein Groups	# Proteins	# PSMs	Master Protein Accessions	Positions in Master Proteins	# Missed Cleavages	Theo. MH+ [Da]	# Razor Quan Results	Abundance Ratio: (114) / (113)	Abundance Ratio: (116) / (113)	Abundance Ratio: (117) / (113)	Abundance Ratio: (118) / (113)	Abundance Ratio: (119) / (113)	Abundances (Grouped): 113	Abundances (Grouped): 114	Abundances (Grouped): 115	Abundances (Grouped): 116	Abundances (Grouped): 117	Abundances (Grouped): 118	Abundances (Grouped): 119	Abundances (Grouped): 121	Quan Info	Found in Sample: [S98] F12: 114, Sample	Found in Sample: [S99] F12: 115, Sample	Found in Sample: [S100] F12: 116, Sample	Found in Sample: [S101] F12: 117, Sample	Found in Sample: [S102] F12: 118, Sample	Found in Sample: [S103] F12: 119, Sample	Found in Sample: [S104] F12: 121, Sample	Percolator PEP (by Search Engine): Sequest HT	XCorr (by Search Engine): Sequest HT	Sequence in Protein	Positions in Protein	Peptide Group Modifications in Protein	Quan Usage
FALSE	[R].GHENKP.[-]		1	0.939969	1	1	1	c192492_g1	c192492_g1 [73-78]	0	681.331	0														No Quan Labels	Low	Low	Low	Low	Low	Low	Low	1	0.23	R.GHENKP.-	[73-78]		Not Used
	Confidence	PSM Ambiguity	Annotated Sequence	Modifications	# Protein Groups	# Proteins	Master Protein Accessions	Protein Accessions	# Missed Cleavages	Charge	DeltaScore	DeltaCn	Rank	m/z [Da]	MH+ [Da]	Theo. MH+ [Da]	DeltaM [ppm]	Deltam/z [Da]	Activation Type	MS Order	Isolation Interference [%]	Average Reporter S/N	Ion Inject Time [ms]	RT [min]	First Scan	Spectrum File	Abundance: 113	Abundance: 114	Abundance: 115	Abundance: 116	Abundance: 117	Abundance: 118	Abundance: 119	XCorr	Percolator q-Value	Percolator PEP
	Low	Unambiguous	[R].GHENKP.[-]		1	1	c192492_g1	c192492_g1	0	2	0.3478	0	1	341.168	681.329	681.331	-3.13	-0.00107	HCD (High Energy Collision Dissociation)	MS2	24.3765	8.2	50	17.0681	3739	SHUTSA.raw	11.1	5.9	9.6	8.8	9	8.7	10.2	0.23	0.9525	1
High	c25585_g1	0.071	0	1	1	1	1	1	832	91.6	9.61	0	1														Low	Low	Low	Low	Not Found	Low	Low
Checked	Annotated Sequence	Modifications in Master Proteins	Qvality PEP	Qvality q-value	# Protein Groups	# Proteins	# PSMs	Master Protein Accessions	Positions in Master Proteins	# Missed Cleavages	Theo. MH+ [Da]	# Razor Quan Results	Abundance Ratio: (114) / (113)	Abundance Ratio: (116) / (113)	Abundance Ratio: (117) / (113)	Abundance Ratio: (118) / (113)	Abundance Ratio: (119) / (113)	Abundances (Grouped): 113	Abundances (Grouped): 114	Abundances (Grouped): 115	Abundances (Grouped): 116	Abundances (Grouped): 117	Abundances (Grouped): 118	Abundances (Grouped): 119	Abundances (Grouped): 121	Quan Info	Found in Sample: [S98] F12: 114, Sample	Found in Sample: [S99] F12: 115, Sample	Found in Sample: [S100] F12: 116, Sample	Found in Sample: [S101] F12: 117, Sample	Found in Sample: [S102] F12: 118, Sample	Found in Sample: [S103] F12: 119, Sample	Found in Sample: [S104] F12: 121, Sample	Percolator PEP (by Search Engine): Sequest HT	XCorr (by Search Engine): Sequest HT	Sequence in Protein	Positions in Protein	Peptide Group Modifications in Protein	Quan Usage
FALSE	[R].SFARVSTSTSPR.[D]		1	0.931207	1	1	1	c25585_g1	c25585_g1 [193-204]	1	1295.67	0														No Quan Labels	Low	Low	Low	Not Found	Low	Low	Not Found	1	0.55	R.SFARVSTSTSPR.D	[193-204]		Not Used
	Confidence	PSM Ambiguity	Annotated Sequence	Modifications	# Protein Groups	# Proteins	Master Protein Accessions	Protein Accessions	# Missed Cleavages	Charge	DeltaScore	DeltaCn	Rank	m/z [Da]	MH+ [Da]	Theo. MH+ [Da]	DeltaM [ppm]	Deltam/z [Da]	Activation Type	MS Order	Isolation Interference [%]	Average Reporter S/N	Ion Inject Time [ms]	RT [min]	First Scan	Spectrum File	Abundance: 113	Abundance: 114	Abundance: 115	Abundance: 116	Abundance: 117	Abundance: 118	Abundance: 119	XCorr	Percolator q-Value	Percolator PEP
	Low	Unambiguous	[R].SFARVSTSTSPR.[D]		1	1	c25585_g1	c25585_g1	1	2	0.0727	0	1	648.338	1295.67	1295.67	-0.96	-0.00062	HCD (High Energy Collision Dissociation)	MS2	23.3697	150.5	50	40.1029	10260	SHUTSA.raw	1125.8	42	24.6	3.2		4.5	4.1	0.55	0.9362	1
High	c70911_g1	0.043	0	2	1	1	1	1	352	39.9	8.02	0	1														Low	Low	Low	Low	Low	Low	Low
Checked	Annotated Sequence	Modifications in Master Proteins	Qvality PEP	Qvality q-value	# Protein Groups	# Proteins	# PSMs	Master Protein Accessions	Positions in Master Proteins	# Missed Cleavages	Theo. MH+ [Da]	# Razor Quan Results	Abundance Ratio: (114) / (113)	Abundance Ratio: (116) / (113)	Abundance Ratio: (117) / (113)	Abundance Ratio: (118) / (113)	Abundance Ratio: (119) / (113)	Abundances (Grouped): 113	Abundances (Grouped): 114	Abundances (Grouped): 115	Abundances (Grouped): 116	Abundances (Grouped): 117	Abundances (Grouped): 118	Abundances (Grouped): 119	Abundances (Grouped): 121	Quan Info	Found in Sample: [S98] F12: 114, Sample	Found in Sample: [S99] F12: 115, Sample	Found in Sample: [S100] F12: 116, Sample	Found in Sample: [S101] F12: 117, Sample	Found in Sample: [S102] F12: 118, Sample	Found in Sample: [S103] F12: 119, Sample	Found in Sample: [S104] F12: 121, Sample	Percolator PEP (by Search Engine): Sequest HT	XCorr (by Search Engine): Sequest HT	Sequence in Protein	Positions in Protein	Peptide Group Modifications in Protein	Quan Usage
FALSE	[R].DGVLRGMK.[E]		1	0.859043	1	1	1	c70911_g1	c70911_g1 [78-85]	1	875.477	0														No Quan Labels	Low	Low	Low	Low	Low	Low	Not Found	1	0.56	R.DGVLRGMK.E	[78-85]		Not Used
	Confidence	PSM Ambiguity	Annotated Sequence	Modifications	# Protein Groups	# Proteins	Master Protein Accessions	Protein Accessions	# Missed Cleavages	Charge	DeltaScore	DeltaCn	Rank	m/z [Da]	MH+ [Da]	Theo. MH+ [Da]	DeltaM [ppm]	Deltam/z [Da]	Activation Type	MS Order	Isolation Interference [%]	Average Reporter S/N	Ion Inject Time [ms]	RT [min]	First Scan	Spectrum File	Abundance: 113	Abundance: 114	Abundance: 115	Abundance: 116	Abundance: 117	Abundance: 118	Abundance: 119	XCorr	Percolator q-Value	Percolator PEP
	Low	Unambiguous	[R].DGVLRGMK.[E]		1	1	c70911_g1	c70911_g1	1	2	0.1071	0	1	438.245	875.483	875.477	6.88	0.00301	HCD (High Energy Collision Dissociation)	MS2	30.119	36.3	50	34.9868	8891	SHUTSA.raw	67.2	45.5	44.3	39.1	27	35.3	32	0.56	0.8974	1
High	c79299_g1	0.044	0	3	1	2	1	1	241	28.5	6	0	1														Low	Low	Low	Low	Low	Low	Low
Checked	Annotated Sequence	Modifications in Master Proteins	Qvality PEP	Qvality q-value	# Protein Groups	# Proteins	# PSMs	Master Protein Accessions	Positions in Master Proteins	# Missed Cleavages	Theo. MH+ [Da]	# Razor Quan Results	Abundance Ratio: (114) / (113)	Abundance Ratio: (116) / (113)	Abundance Ratio: (117) / (113)	Abundance Ratio: (118) / (113)	Abundance Ratio: (119) / (113)	Abundances (Grouped): 113	Abundances (Grouped): 114	Abundances (Grouped): 115	Abundances (Grouped): 116	Abundances (Grouped): 117	Abundances (Grouped): 118	Abundances (Grouped): 119	Abundances (Grouped): 121	Quan Info	Found in Sample: [S98] F12: 114, Sample	Found in Sample: [S99] F12: 115, Sample	Found in Sample: [S100] F12: 116, Sample	Found in Sample: [S101] F12: 117, Sample	Found in Sample: [S102] F12: 118, Sample	Found in Sample: [S103] F12: 119, Sample	Found in Sample: [S104] F12: 121, Sample	Percolator PEP (by Search Engine): Sequest HT	XCorr (by Search Engine): Sequest HT	Sequence in Protein	Positions in Protein	Peptide Group Modifications in Protein	Quan Usage
FALSE	[R].LKAMESLK.[E]		1	0.921339	1	1	2	c79299_g1	c79299_g1 [128-135]	1	1223.73	0														No Quan Values	Low	Low	Low	Low	Low	Low	Not Found	1	0.44	R.LKAMESLK.E	[128-135]		Not Used
	Confidence	PSM Ambiguity	Annotated Sequence	Modifications	# Protein Groups	# Proteins	Master Protein Accessions	Protein Accessions	# Missed Cleavages	Charge	DeltaScore	DeltaCn	Rank	m/z [Da]	MH+ [Da]	Theo. MH+ [Da]	DeltaM [ppm]	Deltam/z [Da]	Activation Type	MS Order	Isolation Interference [%]	Average Reporter S/N	Ion Inject Time [ms]	RT [min]	First Scan	Spectrum File	Abundance: 113	Abundance: 114	Abundance: 115	Abundance: 116	Abundance: 117	Abundance: 118	Abundance: 119	XCorr	Percolator q-Value	Percolator PEP
	Low	Unambiguous	[R].LKAMESLk.[E]	K8(iTRAQ8plex)	1	1	c79299_g1	c79299_g1	1	2	0.0682	0	1	612.367	1223.73	1223.73	-6.21	-0.0038	HCD (High Energy Collision Dissociation)	MS2	17.0634	8.4	50	46.5022	11839	SHUTSA.raw	10.3	8.7	17.5	6.3	7.2	11.6	5.5	0.44	0.9187	1
	Low	Rejected	[R].LKAMESLk.[E]	K8(iTRAQ8plex)	1	1	c79299_g1	c79299_g1	1	2		0	2	612.367	1223.73	1223.73	-6.31	-0.00386	HCD (High Energy Collision Dissociation)	MS2	16.5034	5.2	50	61.0363	15351	SHUTSA.raw	7.4	5.2	10	4.8	4.9	9.1		0.39	0.9301	1
High	c94231_g1	0.05	0	1	1	3	1	1	559	62.8	6.68	0	1														Low	Low	Low	Low	Low	Low	Low
Checked	Annotated Sequence	Modifications in Master Proteins	Qvality PEP	Qvality q-value	# Protein Groups	# Proteins	# PSMs	Master Protein Accessions	Positions in Master Proteins	# Missed Cleavages	Theo. MH+ [Da]	# Razor Quan Results	Abundance Ratio: (114) / (113)	Abundance Ratio: (116) / (113)	Abundance Ratio: (117) / (113)	Abundance Ratio: (118) / (113)	Abundance Ratio: (119) / (113)	Abundances (Grouped): 113	Abundances (Grouped): 114	Abundances (Grouped): 115	Abundances (Grouped): 116	Abundances (Grouped): 117	Abundances (Grouped): 118	Abundances (Grouped): 119	Abundances (Grouped): 121	Quan Info	Found in Sample: [S98] F12: 114, Sample	Found in Sample: [S99] F12: 115, Sample	Found in Sample: [S100] F12: 116, Sample	Found in Sample: [S101] F12: 117, Sample	Found in Sample: [S102] F12: 118, Sample	Found in Sample: [S103] F12: 119, Sample	Found in Sample: [S104] F12: 121, Sample	Percolator PEP (by Search Engine): Sequest HT	XCorr (by Search Engine): Sequest HT	Sequence in Protein	Positions in Protein	Peptide Group Modifications in Protein	Quan Usage
FALSE	[R].RTRQLQR.[Q]		1	0.844476	1	1	3	c94231_g1	c94231_g1 [369-375]	2	957.57	0														No Quan Labels	Low	Low	Low	Low	Low	Low	Not Found	1	0.63	R.RTRQLQR.Q	[369-375]		Not Used
	Confidence	PSM Ambiguity	Annotated Sequence	Modifications	# Protein Groups	# Proteins	Master Protein Accessions	Protein Accessions	# Missed Cleavages	Charge	DeltaScore	DeltaCn	Rank	m/z [Da]	MH+ [Da]	Theo. MH+ [Da]	DeltaM [ppm]	Deltam/z [Da]	Activation Type	MS Order	Isolation Interference [%]	Average Reporter S/N	Ion Inject Time [ms]	RT [min]	First Scan	Spectrum File	Abundance: 113	Abundance: 114	Abundance: 115	Abundance: 116	Abundance: 117	Abundance: 118	Abundance: 119	XCorr	Percolator q-Value	Percolator PEP
	Low	Rejected	[R].RTRQLQR.[Q]		1	1	c94231_g1	c94231_g1	2	2		0	3	479.289	957.571	957.57	1.13	0.00054	HCD (High Energy Collision Dissociation)	MS2	18.3236	15.9	10.925	27.0726	6729	SHUTSA.raw	56.1	9.9	12.3	11.6	7	15.5	14.6	0.53	0.8856	1
	Low	Unambiguous	[R].RTRQLQR.[Q]		1	1	c94231_g1	c94231_g1	2	2	0.1587	0	1	479.288	957.569	957.57	-1.29	-0.00062	HCD (High Energy Collision Dissociation)	MS2	34.194	21.5	15.696	25.5442	6281	SHUTSA.raw	72.5	14.1	20.3	18.8	10.6	20.6	15.3	0.63	0.8974	1
	Low	Rejected	[R].RTRQLQR.[Q]		1	1	c94231_g1	c94231_g1	2	2		0.0233	2	479.289	957.57	957.57	-0.27	-0.00013	HCD (High Energy Collision Dissociation)	MS2	14.8363	12.7	15.178	46.3596	11803	SHUTSA.raw	35.2	14.1	12.5	7.5	7.4	15	10	0.42	0.8974	1
High	c197286_g1	0.05	0	15	1	1	1	1	80	8.3	7.88	0	1														Low	Low	Low	Low	Low	Low	Low
Checked	Annotated Sequence	Modifications in Master Proteins	Qvality PEP	Qvality q-value	# Protein Groups	# Proteins	# PSMs	Master Protein Accessions	Positions in Master Proteins	# Missed Cleavages	Theo. MH+ [Da]	# Razor Quan Results	Abundance Ratio: (114) / (113)	Abundance Ratio: (116) / (113)	Abundance Ratio: (117) / (113)	Abundance Ratio: (118) / (113)	Abundance Ratio: (119) / (113)	Abundances (Grouped): 113	Abundances (Grouped): 114	Abundances (Grouped): 115	Abundances (Grouped): 116	Abundances (Grouped): 117	Abundances (Grouped): 118	Abundances (Grouped): 119	Abundances (Grouped): 121	Quan Info	Found in Sample: [S98] F12: 114, Sample	Found in Sample: [S99] F12: 115, Sample	Found in Sample: [S100] F12: 116, Sample	Found in Sample: [S101] F12: 117, Sample	Found in Sample: [S102] F12: 118, Sample	Found in Sample: [S103] F12: 119, Sample	Found in Sample: [S104] F12: 121, Sample	Percolator PEP (by Search Engine): Sequest HT	XCorr (by Search Engine): Sequest HT	Sequence in Protein	Positions in Protein	Peptide Group Modifications in Protein	Quan Usage
FALSE	[R].DLSLGLATLALF.[-]		1	0.844476	1	1	1	c197286_g1	c197286_g1 [69-80]	0	1233.71	0														No Quan Labels	Low	Low	Low	Low	Low	Low	Not Found	1	0.62	R.DLSLGLATLALF.-	[69-80]		Not Used
	Confidence	PSM Ambiguity	Annotated Sequence	Modifications	# Protein Groups	# Proteins	Master Protein Accessions	Protein Accessions	# Missed Cleavages	Charge	DeltaScore	DeltaCn	Rank	m/z [Da]	MH+ [Da]	Theo. MH+ [Da]	DeltaM [ppm]	Deltam/z [Da]	Activation Type	MS Order	Isolation Interference [%]	Average Reporter S/N	Ion Inject Time [ms]	RT [min]	First Scan	Spectrum File	Abundance: 113	Abundance: 114	Abundance: 115	Abundance: 116	Abundance: 117	Abundance: 118	Abundance: 119	XCorr	Percolator q-Value	Percolator PEP
	Low	Unambiguous	[R].DLSLGLATLALF.[-]		1	1	c197286_g1	c197286_g1	0	2	0.3065	0	1	617.359	1233.71	1233.71	1.38	0.00085	HCD (High Energy Collision Dissociation)	MS2	0	16.7	41.014	40.9511	10477	SHUTSA.raw	9.2	6.5	8.4	34	33	28.2	14.5	0.62	0.8856	1
High	c73476_g1	0.051	0	4	1	1	1	1	434	48.6	8.31	0	1														Not Found	Not Found	Low	Not Found	Low	Not Found	Low
Checked	Annotated Sequence	Modifications in Master Proteins	Qvality PEP	Qvality q-value	# Protein Groups	# Proteins	# PSMs	Master Protein Accessions	Positions in Master Proteins	# Missed Cleavages	Theo. MH+ [Da]	# Razor Quan Results	Abundance Ratio: (114) / (113)	Abundance Ratio: (116) / (113)	Abundance Ratio: (117) / (113)	Abundance Ratio: (118) / (113)	Abundance Ratio: (119) / (113)	Abundances (Grouped): 113	Abundances (Grouped): 114	Abundances (Grouped): 115	Abundances (Grouped): 116	Abundances (Grouped): 117	Abundances (Grouped): 118	Abundances (Grouped): 119	Abundances (Grouped): 121	Quan Info	Found in Sample: [S98] F12: 114, Sample	Found in Sample: [S99] F12: 115, Sample	Found in Sample: [S100] F12: 116, Sample	Found in Sample: [S101] F12: 117, Sample	Found in Sample: [S102] F12: 118, Sample	Found in Sample: [S103] F12: 119, Sample	Found in Sample: [S104] F12: 121, Sample	Percolator PEP (by Search Engine): Sequest HT	XCorr (by Search Engine): Sequest HT	Sequence in Protein	Positions in Protein	Peptide Group Modifications in Protein	Quan Usage
FALSE	[R].LLPYTVQSLANSVILK.[Y]		1	0.926466	1	1	1	c73476_g1	c73476_g1 [114-129]	0	2063.24	0														No Quan Values	Not Found	Low	Not Found	Low	Not Found	Low	Not Found	1	0.31	R.LLPYTVQSLANSVILK.Y	[114-129]		Not Used
	Confidence	PSM Ambiguity	Annotated Sequence	Modifications	# Protein Groups	# Proteins	Master Protein Accessions	Protein Accessions	# Missed Cleavages	Charge	DeltaScore	DeltaCn	Rank	m/z [Da]	MH+ [Da]	Theo. MH+ [Da]	DeltaM [ppm]	Deltam/z [Da]	Activation Type	MS Order	Isolation Interference [%]	Average Reporter S/N	Ion Inject Time [ms]	RT [min]	First Scan	Spectrum File	Abundance: 113	Abundance: 114	Abundance: 115	Abundance: 116	Abundance: 117	Abundance: 118	Abundance: 119	XCorr	Percolator q-Value	Percolator PEP
	Low	Unambiguous	[R].LLPYTVQSLANSVILk.[Y]	K16(iTRAQ8plex)	1	1	c73476_g1	c73476_g1	0	2	0.1935	0	1	1032.13	2063.25	2063.24	5.67	0.00585	HCD (High Energy Collision Dissociation)	MS2	0	0.9	50	74.5525	18953	SHUTSA.raw			2.7		2		2.6	0.31	0.9309	1
High	c34229_g1	0.051	0	10	1	1	1	1	69	7.8	9.35	0	1														Low	Low	Low	Low	Low	Low	Low
Checked	Annotated Sequence	Modifications in Master Proteins	Qvality PEP	Qvality q-value	# Protein Groups	# Proteins	# PSMs	Master Protein Accessions	Positions in Master Proteins	# Missed Cleavages	Theo. MH+ [Da]	# Razor Quan Results	Abundance Ratio: (114) / (113)	Abundance Ratio: (116) / (113)	Abundance Ratio: (117) / (113)	Abundance Ratio: (118) / (113)	Abundance Ratio: (119) / (113)	Abundances (Grouped): 113	Abundances (Grouped): 114	Abundances (Grouped): 115	Abundances (Grouped): 116	Abundances (Grouped): 117	Abundances (Grouped): 118	Abundances (Grouped): 119	Abundances (Grouped): 121	Quan Info	Found in Sample: [S98] F12: 114, Sample	Found in Sample: [S99] F12: 115, Sample	Found in Sample: [S100] F12: 116, Sample	Found in Sample: [S101] F12: 117, Sample	Found in Sample: [S102] F12: 118, Sample	Found in Sample: [S103] F12: 119, Sample	Found in Sample: [S104] F12: 121, Sample	Percolator PEP (by Search Engine): Sequest HT	XCorr (by Search Engine): Sequest HT	Sequence in Protein	Positions in Protein	Peptide Group Modifications in Protein	Quan Usage
FALSE	[R].FSFLETK.[E]		1	0.855853	1	1	1	c34229_g1	c34229_g1 [41-47]	0	871.456	0														No Quan Labels	Low	Low	Low	Low	Low	Low	Not Found	1	0.5	R.FSFLETK.E	[41-47]		Not Used
	Confidence	PSM Ambiguity	Annotated Sequence	Modifications	# Protein Groups	# Proteins	Master Protein Accessions	Protein Accessions	# Missed Cleavages	Charge	DeltaScore	DeltaCn	Rank	m/z [Da]	MH+ [Da]	Theo. MH+ [Da]	DeltaM [ppm]	Deltam/z [Da]	Activation Type	MS Order	Isolation Interference [%]	Average Reporter S/N	Ion Inject Time [ms]	RT [min]	First Scan	Spectrum File	Abundance: 113	Abundance: 114	Abundance: 115	Abundance: 116	Abundance: 117	Abundance: 118	Abundance: 119	XCorr	Percolator q-Value	Percolator PEP
	Low	Selected	[R].FSFLETK.[E]		1	1	c34229_g1	c34229_g1	0	2	0.04	0	1	436.234	871.462	871.456	6.5	0.00283	HCD (High Energy Collision Dissociation)	MS2	48.4627	137.4	50	42.6233	10901	SHUTSA.raw	142.8	143.8	146.7	173.9	151.8	151.4	189.1	0.5	0.8974	1
High	c118694_g1	0.051	0	8	1	3	1	1	100	11	5.19	0	1														Low	Low	Low	Low	Low	Low	Low
Checked	Annotated Sequence	Modifications in Master Proteins	Qvality PEP	Qvality q-value	# Protein Groups	# Proteins	# PSMs	Master Protein Accessions	Positions in Master Proteins	# Missed Cleavages	Theo. MH+ [Da]	# Razor Quan Results	Abundance Ratio: (114) / (113)	Abundance Ratio: (116) / (113)	Abundance Ratio: (117) / (113)	Abundance Ratio: (118) / (113)	Abundance Ratio: (119) / (113)	Abundances (Grouped): 113	Abundances (Grouped): 114	Abundances (Grouped): 115	Abundances (Grouped): 116	Abundances (Grouped): 117	Abundances (Grouped): 118	Abundances (Grouped): 119	Abundances (Grouped): 121	Quan Info	Found in Sample: [S98] F12: 114, Sample	Found in Sample: [S99] F12: 115, Sample	Found in Sample: [S100] F12: 116, Sample	Found in Sample: [S101] F12: 117, Sample	Found in Sample: [S102] F12: 118, Sample	Found in Sample: [S103] F12: 119, Sample	Found in Sample: [S104] F12: 121, Sample	Percolator PEP (by Search Engine): Sequest HT	XCorr (by Search Engine): Sequest HT	Sequence in Protein	Positions in Protein	Peptide Group Modifications in Protein	Quan Usage
FALSE	[R].LARMLSIR.[E]		1	0.844476	1	1	3	c118694_g1	c118694_g1 [48-55]	1	975.577	0														No Quan Labels	Low	Low	Low	Low	Low	Low	Not Found	1	0.49	R.LARMLSIR.E	[48-55]		Not Used
	Confidence	PSM Ambiguity	Annotated Sequence	Modifications	# Protein Groups	# Proteins	Master Protein Accessions	Protein Accessions	# Missed Cleavages	Charge	DeltaScore	DeltaCn	Rank	m/z [Da]	MH+ [Da]	Theo. MH+ [Da]	DeltaM [ppm]	Deltam/z [Da]	Activation Type	MS Order	Isolation Interference [%]	Average Reporter S/N	Ion Inject Time [ms]	RT [min]	First Scan	Spectrum File	Abundance: 113	Abundance: 114	Abundance: 115	Abundance: 116	Abundance: 117	Abundance: 118	Abundance: 119	XCorr	Percolator q-Value	Percolator PEP
	Low	Rejected	[R].LARmLSIR.[E]	M4(Oxidation)	1	1	c118694_g1	c118694_g1	1	2		0.0222	3	488.294	975.581	975.577	4.48	0.00218	HCD (High Energy Collision Dissociation)	MS2	86.2593	137.6	50	28.5383	7144	SHUTSA.raw	827.1	98.4	47.3	30.4	24.9	31.1	41.9	0.44	0.8856	1
	Low	Selected	[R].LARmLSIR.[E]	M4(Oxidation)	1	1	c118694_g1	c118694_g1	1	2	0.0408	0	1	488.294	975.581	975.577	4.23	0.00206	HCD (High Energy Collision Dissociation)	MS2	61.2732	111.9	34.429	27.6944	6904	SHUTSA.raw	666.8	82.1	31.6	20.8	21.3	28.6	44	0.49	0.8974	1
	Low	Selected	[R].LARmLSIR.[E]	M4(Oxidation)	1	1	c118694_g1	c118694_g1	1	2	0.0313	0	1	488.294	975.581	975.577	4.79	0.00234	HCD (High Energy Collision Dissociation)	MS2	39.1695	32.6	50	6.9592	1454	SHUTSA.raw	185.7	19	14.5	14.8	11.4	9	6.4	0.32	0.8974	1
High	c76326_g3	0.052	0	1	1	2	1	1	592	67.1	4.82	0	1														Low	Low	Low	Low	Low	Low	Low
Checked	Annotated Sequence	Modifications in Master Proteins	Qvality PEP	Qvality q-value	# Protein Groups	# Proteins	# PSMs	Master Protein Accessions	Positions in Master Proteins	# Missed Cleavages	Theo. MH+ [Da]	# Razor Quan Results	Abundance Ratio: (114) / (113)	Abundance Ratio: (116) / (113)	Abundance Ratio: (117) / (113)	Abundance Ratio: (118) / (113)	Abundance Ratio: (119) / (113)	Abundances (Grouped): 113	Abundances (Grouped): 114	Abundances (Grouped): 115	Abundances (Grouped): 116	Abundances (Grouped): 117	Abundances (Grouped): 118	Abundances (Grouped): 119	Abundances (Grouped): 121	Quan Info	Found in Sample: [S98] F12: 114, Sample	Found in Sample: [S99] F12: 115, Sample	Found in Sample: [S100] F12: 116, Sample	Found in Sample: [S101] F12: 117, Sample	Found in Sample: [S102] F12: 118, Sample	Found in Sample: [S103] F12: 119, Sample	Found in Sample: [S104] F12: 121, Sample	Percolator PEP (by Search Engine): Sequest HT	XCorr (by Search Engine): Sequest HT	Sequence in Protein	Positions in Protein	Peptide Group Modifications in Protein	Quan Usage
FALSE	[K].FTKSSESK.[G]		1	0.891176	1	1	2	c76326_g3	c76326_g3 [210-217]	1	913.463	0														No Quan Labels	Low	Low	Low	Low	Low	Low	Not Found	1	0.88	K.FTKSSESK.G	[210-217]		Not Used
	Confidence	PSM Ambiguity	Annotated Sequence	Modifications	# Protein Groups	# Proteins	Master Protein Accessions	Protein Accessions	# Missed Cleavages	Charge	DeltaScore	DeltaCn	Rank	m/z [Da]	MH+ [Da]	Theo. MH+ [Da]	DeltaM [ppm]	Deltam/z [Da]	Activation Type	MS Order	Isolation Interference [%]	Average Reporter S/N	Ion Inject Time [ms]	RT [min]	First Scan	Spectrum File	Abundance: 113	Abundance: 114	Abundance: 115	Abundance: 116	Abundance: 117	Abundance: 118	Abundance: 119	XCorr	Percolator q-Value	Percolator PEP
	Low	Unambiguous	[K].FTKSSESK.[G]		1	1	c76326_g3	c76326_g3	1	2	0.381	0	1	457.237	913.466	913.463	3.91	0.00179	HCD (High Energy Collision Dissociation)	MS2	42.4209	15.3	17.262	31.7783	8019	SHUTSA.raw	9.5	9.5	8.9	14.2	15.8	44.1	20.6	0.84	0.9039	1
	Low	Unambiguous	[K].FTKSSESK.[G]		1	1	c76326_g3	c76326_g3	1	2	0.3977	0	1	457.235	913.463	913.463	0.57	0.00026	HCD (High Energy Collision Dissociation)	MS2	34.0289	35	50	31.9466	8068	SHUTSA.raw	25.1	29.7	22.1	36.3	35.9	90.4	40.2	0.88	0.9272	1
High	c33353_g1	0.052	0	1	1	1	1	1	1187	131.3	6.16	0	1														Low	Low	Low	Low	Low	Low	Low
Checked	Annotated Sequence	Modifications in Master Proteins	Qvality PEP	Qvality q-value	# Protein Groups	# Proteins	# PSMs	Master Protein Accessions	Positions in Master Proteins	# Missed Cleavages	Theo. MH+ [Da]	# Razor Quan Results	Abundance Ratio: (114) / (113)	Abundance Ratio: (116) / (113)	Abundance Ratio: (117) / (113)	Abundance Ratio: (118) / (113)	Abundance Ratio: (119) / (113)	Abundances (Grouped): 113	Abundances (Grouped): 114	Abundances (Grouped): 115	Abundances (Grouped): 116	Abundances (Grouped): 117	Abundances (Grouped): 118	Abundances (Grouped): 119	Abundances (Grouped): 121	Quan Info	Found in Sample: [S98] F12: 114, Sample	Found in Sample: [S99] F12: 115, Sample	Found in Sample: [S100] F12: 116, Sample	Found in Sample: [S101] F12: 117, Sample	Found in Sample: [S102] F12: 118, Sample	Found in Sample: [S103] F12: 119, Sample	Found in Sample: [S104] F12: 121, Sample	Percolator PEP (by Search Engine): Sequest HT	XCorr (by Search Engine): Sequest HT	Sequence in Protein	Positions in Protein	Peptide Group Modifications in Protein	Quan Usage
FALSE	[K].AAMSTGK.[Q]		1	0.846029	1	1	1	c33353_g1	c33353_g1 [946-952]	0	985.529	0														No Quan Values	Low	Low	Low	Low	Low	Low	Not Found	1	0.78	K.AAMSTGK.Q	[946-952]		Not Used
	Confidence	PSM Ambiguity	Annotated Sequence	Modifications	# Protein Groups	# Proteins	Master Protein Accessions	Protein Accessions	# Missed Cleavages	Charge	DeltaScore	DeltaCn	Rank	m/z [Da]	MH+ [Da]	Theo. MH+ [Da]	DeltaM [ppm]	Deltam/z [Da]	Activation Type	MS Order	Isolation Interference [%]	Average Reporter S/N	Ion Inject Time [ms]	RT [min]	First Scan	Spectrum File	Abundance: 113	Abundance: 114	Abundance: 115	Abundance: 116	Abundance: 117	Abundance: 118	Abundance: 119	XCorr	Percolator q-Value	Percolator PEP
	Low	Unambiguous	[K].aAmSTGK.[Q]	N-Term(iTRAQ8plex); M3(Oxidation)	1	1	c33353_g1	c33353_g1	0	2	0.2051	0	1	493.268	985.529	985.529	-0.11	-5e-05	HCD (High Energy Collision Dissociation)	MS2	51.5068	21.7	50	33.3717	8443	SHUTSA.raw	26.3	19.8	25.8	23.7	18.9	30.3	29.1	0.78	0.8974	1
High	c69769_g1	0.052	0	1	1	2	1	1	1123	127.9	7.31	0	1														Low	Low	Low	Low	Low	Low	Low
Checked	Annotated Sequence	Modifications in Master Proteins	Qvality PEP	Qvality q-value	# Protein Groups	# Proteins	# PSMs	Master Protein Accessions	Positions in Master Proteins	# Missed Cleavages	Theo. MH+ [Da]	# Razor Quan Results	Abundance Ratio: (114) / (113)	Abundance Ratio: (116) / (113)	Abundance Ratio: (117) / (113)	Abundance Ratio: (118) / (113)	Abundance Ratio: (119) / (113)	Abundances (Grouped): 113	Abundances (Grouped): 114	Abundances (Grouped): 115	Abundances (Grouped): 116	Abundances (Grouped): 117	Abundances (Grouped): 118	Abundances (Grouped): 119	Abundances (Grouped): 121	Quan Info	Found in Sample: [S98] F12: 114, Sample	Found in Sample: [S99] F12: 115, Sample	Found in Sample: [S100] F12: 116, Sample	Found in Sample: [S101] F12: 117, Sample	Found in Sample: [S102] F12: 118, Sample	Found in Sample: [S103] F12: 119, Sample	Found in Sample: [S104] F12: 121, Sample	Percolator PEP (by Search Engine): Sequest HT	XCorr (by Search Engine): Sequest HT	Sequence in Protein	Positions in Protein	Peptide Group Modifications in Protein	Quan Usage
FALSE	[R].KVVLDALTTK.[G]		1	0.926357	1	1	2	c69769_g1	c69769_g1 [500-509]	1	1087.67	0														No Quan Labels	Low	Low	Low	Low	Low	Low	Not Found	1	0.6	R.KVVLDALTTK.G	[500-509]		Not Used
	Confidence	PSM Ambiguity	Annotated Sequence	Modifications	# Protein Groups	# Proteins	Master Protein Accessions	Protein Accessions	# Missed Cleavages	Charge	DeltaScore	DeltaCn	Rank	m/z [Da]	MH+ [Da]	Theo. MH+ [Da]	DeltaM [ppm]	Deltam/z [Da]	Activation Type	MS Order	Isolation Interference [%]	Average Reporter S/N	Ion Inject Time [ms]	RT [min]	First Scan	Spectrum File	Abundance: 113	Abundance: 114	Abundance: 115	Abundance: 116	Abundance: 117	Abundance: 118	Abundance: 119	XCorr	Percolator q-Value	Percolator PEP
	Low	Selected	[R].KVVLDALTTK.[G]		1	1	c69769_g1	c69769_g1	1	2	0.0167	0	1	544.337	1087.67	1087.67	-4.91	-0.00267	HCD (High Energy Collision Dissociation)	MS2	36.6568	25.2	50	25.2166	6193	SHUTSA.raw	65.5	22.3	57.8	14	12.1	16.3	13.3	0.6	0.9301	1
	Low	Unambiguous	[R].KVVLDALTTK.[G]		1	1	c69769_g1	c69769_g1	1	2	0.2542	0	1	544.34	1087.67	1087.67	-0.08	-5e-05	HCD (High Energy Collision Dissociation)	MS2	27.7546	23.8	50	25.6333	6306	SHUTSA.raw	58.6	25.9	45.2	13.6	18.2	16.6	12.6	0.59	0.9301	1
High	c42128_g1	0.057	0	2	2	4	2	1	660	73.5	9.11	0	2														Low	Low	Low	Low	Low	Low	Low
Checked	Annotated Sequence	Modifications in Master Proteins	Qvality PEP	Qvality q-value	# Protein Groups	# Proteins	# PSMs	Master Protein Accessions	Positions in Master Proteins	# Missed Cleavages	Theo. MH+ [Da]	# Razor Quan Results	Abundance Ratio: (114) / (113)	Abundance Ratio: (116) / (113)	Abundance Ratio: (117) / (113)	Abundance Ratio: (118) / (113)	Abundance Ratio: (119) / (113)	Abundances (Grouped): 113	Abundances (Grouped): 114	Abundances (Grouped): 115	Abundances (Grouped): 116	Abundances (Grouped): 117	Abundances (Grouped): 118	Abundances (Grouped): 119	Abundances (Grouped): 121	Quan Info	Found in Sample: [S98] F12: 114, Sample	Found in Sample: [S99] F12: 115, Sample	Found in Sample: [S100] F12: 116, Sample	Found in Sample: [S101] F12: 117, Sample	Found in Sample: [S102] F12: 118, Sample	Found in Sample: [S103] F12: 119, Sample	Found in Sample: [S104] F12: 121, Sample	Percolator PEP (by Search Engine): Sequest HT	XCorr (by Search Engine): Sequest HT	Sequence in Protein	Positions in Protein	Peptide Group Modifications in Protein	Quan Usage
FALSE	[K].LPKENTASK.[Q]		1	0.855853	1	1	3	c42128_g1	c42128_g1 [210-218]	1	987.547	0														No Quan Labels	Low	Low	Low	Low	Low	Low	Not Found	1	0.66	K.LPKENTASK.Q	[210-218]		Not Used
	Confidence	PSM Ambiguity	Annotated Sequence	Modifications	# Protein Groups	# Proteins	Master Protein Accessions	Protein Accessions	# Missed Cleavages	Charge	DeltaScore	DeltaCn	Rank	m/z [Da]	MH+ [Da]	Theo. MH+ [Da]	DeltaM [ppm]	Deltam/z [Da]	Activation Type	MS Order	Isolation Interference [%]	Average Reporter S/N	Ion Inject Time [ms]	RT [min]	First Scan	Spectrum File	Abundance: 113	Abundance: 114	Abundance: 115	Abundance: 116	Abundance: 117	Abundance: 118	Abundance: 119	XCorr	Percolator q-Value	Percolator PEP
	Low	Selected	[K].LPKENTASK.[Q]		1	1	c42128_g1	c42128_g1	1	2		0	2	494.277	987.547	987.547	0.36	0.00018	HCD (High Energy Collision Dissociation)	MS2	32.7575	21.8	50	37.4614	9576	SHUTSA.raw	36.1	17.2	32.7	17.7	9.1	30.6	31.1	0.66	0.8974	1
	Low	Selected	[K].LPKENTASK.[Q]		1	1	c42128_g1	c42128_g1	1	2		0.0238	2	494.277	987.547	987.547	0.23	0.00012	HCD (High Energy Collision Dissociation)	MS2	34.8553	6	50	21.3524	4918	SHUTSA.raw	8.5	3.2	6.6	4.7	4.3	10.2	10.7	0.41	0.8974	1
	Low	Selected	[K].LPKENTASK.[Q]		1	1	c42128_g1	c42128_g1	1	2		0.0169	2	494.276	987.544	987.547	-2.73	-0.00135	HCD (High Energy Collision Dissociation)	MS2	36.5813	13.5	50	60.497	15225	SHUTSA.raw	18.3	13.5	18.3	11.1	9.5	16.6	20.7	0.58	0.9536	1
FALSE	[R].VPKKAR.[R]		1	0.873348	1	1	1	c42128_g1	c42128_g1 [506-511]	2	698.467	0														No Quan Labels	Low	Low	Low	Low	Low	Low	Not Found	1	0.19	R.VPKKAR.R	[506-511]		Not Used
	Confidence	PSM Ambiguity	Annotated Sequence	Modifications	# Protein Groups	# Proteins	Master Protein Accessions	Protein Accessions	# Missed Cleavages	Charge	DeltaScore	DeltaCn	Rank	m/z [Da]	MH+ [Da]	Theo. MH+ [Da]	DeltaM [ppm]	Deltam/z [Da]	Activation Type	MS Order	Isolation Interference [%]	Average Reporter S/N	Ion Inject Time [ms]	RT [min]	First Scan	Spectrum File	Abundance: 113	Abundance: 114	Abundance: 115	Abundance: 116	Abundance: 117	Abundance: 118	Abundance: 119	XCorr	Percolator q-Value	Percolator PEP
	Low	Unambiguous	[R].VPKKAR.[R]		1	1	c42128_g1	c42128_g1	2	2	0.0526	0	1	349.74	698.472	698.467	6.79	0.00237	HCD (High Energy Collision Dissociation)	MS2	58.4729	205.6	28.155	33.7905	8558	SHUTSA.raw	235.1	216.7	353.5	189	183.8	228.1	238.6	0.19	0.8974	1
High	c190182_g1	0.052	0	6	1	1	1	1	297	33.4	8.31	0	1														Low	Low	Low	Low	Low	Low	Low
Checked	Annotated Sequence	Modifications in Master Proteins	Qvality PEP	Qvality q-value	# Protein Groups	# Proteins	# PSMs	Master Protein Accessions	Positions in Master Proteins	# Missed Cleavages	Theo. MH+ [Da]	# Razor Quan Results	Abundance Ratio: (114) / (113)	Abundance Ratio: (116) / (113)	Abundance Ratio: (117) / (113)	Abundance Ratio: (118) / (113)	Abundance Ratio: (119) / (113)	Abundances (Grouped): 113	Abundances (Grouped): 114	Abundances (Grouped): 115	Abundances (Grouped): 116	Abundances (Grouped): 117	Abundances (Grouped): 118	Abundances (Grouped): 119	Abundances (Grouped): 121	Quan Info	Found in Sample: [S98] F12: 114, Sample	Found in Sample: [S99] F12: 115, Sample	Found in Sample: [S100] F12: 116, Sample	Found in Sample: [S101] F12: 117, Sample	Found in Sample: [S102] F12: 118, Sample	Found in Sample: [S103] F12: 119, Sample	Found in Sample: [S104] F12: 121, Sample	Percolator PEP (by Search Engine): Sequest HT	XCorr (by Search Engine): Sequest HT	Sequence in Protein	Positions in Protein	Peptide Group Modifications in Protein	Quan Usage
FALSE	[R].IRSLALKQVMGISLADLK.[E]		1	0.936562	1	1	1	c190182_g1	c190182_g1 [68-85]	2	2564.58	0														No Quan Values	Low	Low	Low	Low	Low	Low	Not Found	1	0.33	R.IRSLALKQVMGISLADLK.E	[68-85]		Not Used
	Confidence	PSM Ambiguity	Annotated Sequence	Modifications	# Protein Groups	# Proteins	Master Protein Accessions	Protein Accessions	# Missed Cleavages	Charge	DeltaScore	DeltaCn	Rank	m/z [Da]	MH+ [Da]	Theo. MH+ [Da]	DeltaM [ppm]	Deltam/z [Da]	Activation Type	MS Order	Isolation Interference [%]	Average Reporter S/N	Ion Inject Time [ms]	RT [min]	First Scan	Spectrum File	Abundance: 113	Abundance: 114	Abundance: 115	Abundance: 116	Abundance: 117	Abundance: 118	Abundance: 119	XCorr	Percolator q-Value	Percolator PEP
	Low	Unambiguous	[R].IRSLALkQVMGISLADLk.[E]	K7(iTRAQ8plex); K18(iTRAQ8plex)	1	1	c190182_g1	c190182_g1	2	2	0.3333	0	1	1282.8	2564.59	2564.58	2.96	0.0038	HCD (High Energy Collision Dissociation)	MS2	0	4.8	50	72.5791	18379	SHUTSA.raw	4.7	4.8	5	7.3	3.9	7.6	5.3	0.33	0.9461	1
High	c45980_g1	0.057	0	3	1	1	1	1	333	37.3	10.68	0	1	1.151	1.199	0.504	0.349	0.902	0.716	137.4	158.2	164.8	69.3	47.9	123.9	98.4	Low	Low	Low	Low	Low	Low	Low
Checked	Annotated Sequence	Modifications in Master Proteins	Qvality PEP	Qvality q-value	# Protein Groups	# Proteins	# PSMs	Master Protein Accessions	Positions in Master Proteins	# Missed Cleavages	Theo. MH+ [Da]	# Razor Quan Results	Abundance Ratio: (114) / (113)	Abundance Ratio: (116) / (113)	Abundance Ratio: (117) / (113)	Abundance Ratio: (118) / (113)	Abundance Ratio: (119) / (113)	Abundances (Grouped): 113	Abundances (Grouped): 114	Abundances (Grouped): 115	Abundances (Grouped): 116	Abundances (Grouped): 117	Abundances (Grouped): 118	Abundances (Grouped): 119	Abundances (Grouped): 121	Quan Info	Found in Sample: [S98] F12: 114, Sample	Found in Sample: [S99] F12: 115, Sample	Found in Sample: [S100] F12: 116, Sample	Found in Sample: [S101] F12: 117, Sample	Found in Sample: [S102] F12: 118, Sample	Found in Sample: [S103] F12: 119, Sample	Found in Sample: [S104] F12: 121, Sample	Percolator PEP (by Search Engine): Sequest HT	XCorr (by Search Engine): Sequest HT	Sequence in Protein	Positions in Protein	Peptide Group Modifications in Protein	Quan Usage
FALSE	[K].AGPMIRVGK.[R]		1	0.88822	1	1	1	c45980_g1	c45980_g1 [154-162]	1	1248.74	1	1.151	0.504	0.349	0.902	0.716	137.4	158.2	164.8	69.3	47.9	123.9	98.4			Low	Low	Low	Low	Low	Low	Not Found	1	0.76	K.AGPMIRVGK.R	[154-162]		Used
	Confidence	PSM Ambiguity	Annotated Sequence	Modifications	# Protein Groups	# Proteins	Master Protein Accessions	Protein Accessions	# Missed Cleavages	Charge	DeltaScore	DeltaCn	Rank	m/z [Da]	MH+ [Da]	Theo. MH+ [Da]	DeltaM [ppm]	Deltam/z [Da]	Activation Type	MS Order	Isolation Interference [%]	Average Reporter S/N	Ion Inject Time [ms]	RT [min]	First Scan	Spectrum File	Abundance: 113	Abundance: 114	Abundance: 115	Abundance: 116	Abundance: 117	Abundance: 118	Abundance: 119	XCorr	Percolator q-Value	Percolator PEP
	Low	Selected	[K].aGPmIRVGK.[R]	N-Term(iTRAQ8plex); M4(Oxidation)	1	1	c45980_g1	c45980_g1	1	2	0.0132	0	1	624.871	1248.74	1248.74	-3.55	-0.00222	HCD (High Energy Collision Dissociation)	MS2	11.7293	12.9	50	31.8211	8030	SHUTSA.raw	19.1	19.6	25.7	7.2	4.8	14.7	12	0.76	0.9039	1
High	c84981_g1	0.065	0	7	1	1	1	1	91	10.2	8.07	0	1														Low	Low	Low	Low	Low	Low	Low
Checked	Annotated Sequence	Modifications in Master Proteins	Qvality PEP	Qvality q-value	# Protein Groups	# Proteins	# PSMs	Master Protein Accessions	Positions in Master Proteins	# Missed Cleavages	Theo. MH+ [Da]	# Razor Quan Results	Abundance Ratio: (114) / (113)	Abundance Ratio: (116) / (113)	Abundance Ratio: (117) / (113)	Abundance Ratio: (118) / (113)	Abundance Ratio: (119) / (113)	Abundances (Grouped): 113	Abundances (Grouped): 114	Abundances (Grouped): 115	Abundances (Grouped): 116	Abundances (Grouped): 117	Abundances (Grouped): 118	Abundances (Grouped): 119	Abundances (Grouped): 121	Quan Info	Found in Sample: [S98] F12: 114, Sample	Found in Sample: [S99] F12: 115, Sample	Found in Sample: [S100] F12: 116, Sample	Found in Sample: [S101] F12: 117, Sample	Found in Sample: [S102] F12: 118, Sample	Found in Sample: [S103] F12: 119, Sample	Found in Sample: [S104] F12: 121, Sample	Percolator PEP (by Search Engine): Sequest HT	XCorr (by Search Engine): Sequest HT	Sequence in Protein	Positions in Protein	Peptide Group Modifications in Protein	Quan Usage
FALSE	[K].HKMQRR.[E]		1	0.921339	1	1	1	c84981_g1	c84981_g1 [9-14]	2	871.468	0														No Quan Labels	Low	Low	Low	Low	Low	Low	Not Found	1	0.37	K.HKMQRR.E	[9-14]		Not Used
	Confidence	PSM Ambiguity	Annotated Sequence	Modifications	# Protein Groups	# Proteins	Master Protein Accessions	Protein Accessions	# Missed Cleavages	Charge	DeltaScore	DeltaCn	Rank	m/z [Da]	MH+ [Da]	Theo. MH+ [Da]	DeltaM [ppm]	Deltam/z [Da]	Activation Type	MS Order	Isolation Interference [%]	Average Reporter S/N	Ion Inject Time [ms]	RT [min]	First Scan	Spectrum File	Abundance: 113	Abundance: 114	Abundance: 115	Abundance: 116	Abundance: 117	Abundance: 118	Abundance: 119	XCorr	Percolator q-Value	Percolator PEP
	Low	Unambiguous	[K].HKmQRR.[E]	M3(Oxidation)	1	1	c84981_g1	c84981_g1	2	2	0.0541	0	1	436.234	871.461	871.468	-7.53	-0.00328	HCD (High Energy Collision Dissociation)	MS2	30.6195	31.4	50	71.2801	17971	SHUTSA.raw	45.6	34.6	38.2	37	30.6	32.5	32.9	0.37	0.9272	1
High	c42237_g1	0.066	0	1	1	3	1	1	571	63.1	8.46	0	1														Low	Low	Low	Low	Low	Low	Low
[truncated: 13,280 more rows]

## Sheet: iTRAQ batch B (SHVTS-B)
Protein FDR Confidence: Combined	Accession	Exp. q-value: Combined	Sum PEP Score	Coverage [%]	# Peptides	# PSMs	# Unique Peptides	# Protein Groups	# AAs	MW [kDa]	calc. pI	Score Sequest HT: Sequest HT	# Peptides (by Search Engine): Sequest HT	Abundance Ratio: (114) / (113)	Abundance Ratio: (115) / (113)	Abundance Ratio: (116) / (113)	Abundance Ratio: (117) / (113)	Abundance Ratio: (118) / (113)	Abundance Ratio: (119) / (113)	Abundances (Grouped): 113	Abundances (Grouped): 114	Abundances (Grouped): 115	Abundances (Grouped): 116	Abundances (Grouped): 117	Abundances (Grouped): 118	Abundances (Grouped): 119	Found in Sample: 113	Found in Sample: 114	Found in Sample: 115	Found in Sample 116	Found in Sample: 117	Found in Sample: 118	Found in Sample: 119
[truncated: 24,384 more rows]
